# Supplementary material for: Fungi-sensitized individuals have unique profiles where Alt a 1 dominates promoting response to grass, ragweed and cat allergens
Source: Front Allergy. 2024 Aug 23;5:1438393. doi: 10.3389/falgy.2024.1438393 (PMC11388980; doi:10.3389/falgy.2024.1438393)
Supplement: Supplementary file 1 [file Table1.xlsx]

## Sheet: fungi-chains
index,number
Alt a 1,186							Alt a 1 - Sec c_flour	0.149298	5
Alt a 1 - Phl p 2,20							Alt a 1 - Amb a - Amb a 1 - Cry j 1 - Fel d 1	0.149298	5
Alt a 1 - Fel d 1,20							Alt a 1 - Cyn d - Cyn d 1 - Lol p 1 - Phl p 1	0.149298	5
Alt a 1 - Amb a 1,13							Alt a 1 - Amb a - Amb a 1 - Fel d 1	0.209018	7
Alt a 1 - Amb a - Amb a 1,13							Cla h 8	0.209018	7
Alt a 1 - Lol p 1 - Phl p 1,11							Alt a 1 - Pop n - Sec c_flour	0.238877	8
Alt a 1 - Der f 2 - Der p 2,9							Alt a 1 - Der f 2 - Der p 2	0.268737	9
Alt a 1 - Amb a - Amb a 1 - Cry j 1,9							Alt a 1 - Amb a - Amb a 1 - Cry j	0.268737	9
Alt a 1 - Pop n - Sec c_flour,8							Alt a 1 - Lol p 1 - Phl p 1	0.328456	11
Alt a 1 - Amb a - Amb a 1 - Fel d 1,7							Alt a 1 - Amb a 1	0.388176	13
Cla h 8,7							Alt a 1 - Amb a - Amb a 1	0.388176	13
Alt a 1 - Sec c_flour,5							Alt a 1 - Phl p 2	0.597193	20
Alt a 1 - Amb a - Amb a 1 - Cry j 1 - Fel d 1,5							Alt a 1 - Fel d 1	0.597193	20
Alt a 1 - Cyn d - Cyn d 1 - Lol p 1 - Phl p 1,5							Alt a 1	5.5539	186
Alt a 1 - Amb a 1 - Fel d 1,4
Mala s 11,4
Alt a 1 - Can f_Fd1 - Fel d 1,4
Alt a 1 - Amb a - Amb a 1 - Phl p 2,4
Alt a 1 - Pha v,4
Mala s 5,4
Alt a 1 - Ves v 5,3
Alt a 1 - Fel d 1 - Phl p 2,3
Mala s 6,3
Alt a 1 - Lol p 1 - Phl p 1 - Phl p 2,3
Alt a 1 - Pha v - Pop n,3
Alt a 1 - Art v 1,3
Alt a 1 - Myt e,3
Aca s - Ach d - Alt a 1 - Ani s 3 - Ara h 6 - Ara h 9 - Arg r 1 - Art v 3 - Bla g 9 - Blo t 10 - Can s 3 - Chi spp. - Cra c 6 - Der f 2 - Der p 10 - Der p 2 - Der p 20 - Fel d 2 - Hom g - Jug r 3 - Lit s - Loc m - Lol spp. - Mala s 5 - Myt e - Ory c 3 - Ost e - Pan b - Pec spp. - Pen m 1 - Pen m 2 - Per a - Per a 7 - Phl p 2 - Rat n - Rud spp. - Sol spp. - Ten m - Tyr p - Vit v 1 - Zea m 14,3
Alt a 1 - Der p 23,3
Alt a 1 - Amb a - Amb a 1 - Art v - Art v 1 - Cry j 1,3
Alt a 1 - Amb a 1 - Cry j 1,3
Alt a 1 - Asp f 3 - Phl p 2,3
Alt a 1 - Bet v 1 - Fel d 1,2
Alt a 1 - Cyn d 1 - Lol p 1 - Ost e - Phl p 1,2
Alt a 1 - Asp f 3 - Can f_Fd1 - Der f 2 - Der p 1 - Der p 2 - Fel d 1 - Lep d 2 - Phl p 2 - Ves v 5,2
Alt a 1 - Art v - Art v 1,2
Alt a 1 - Can f_Fd1 - Fel d 1 - Lol p 1 - Phl p 1,2
Alt a 1 - Jug r 1 - Par j 2,2
Alt a 1 - Amb a 1 - Phl p 2,2
Alt a 1 - Amb a - Amb a 4 - Art v - Art v 1 - Can f 1 - Can f 6 - Can f_Fd1 - Cyn d - Cyn d 1 - Equ c 1 - Fag e 2 - Fel d 1 - Fel d 4 - Fel d 7 - Lol p 1 - Pan b - Pas n - Phl p 1 - Phl p 2 - Phl p 5.0101 - Phl p 6 - Pis v 4_RUO - Pla l - Sec c_pollen,2
Act d 2 - Alt a 1 - Phl p 2,2
Alt a 1 - Phl p 2 - Ves v - Ves v 5,2
Fel d 1 - Mala s 5,2
Alt a 1 - Amb a 1 - Vac m,2
Alt a 1 - Pha v - Pop n - Sec c_flour,2
Alt a 1 - Rat n,2
Alt a 1 - Amb a - Amb a 1 - Cry j 1 - Cyn d - Cyn d 1 - Fel d 1 - Lol p 1 - Phl p 1 - Phl p 2 - Phl p 5.0101 - Phl p 6 - Sec c_pollen,2
Alt a 1 - Cry j 1,2
Alt a 1 - Amb a - Amb a 1 - Amb a 4 - Art v 1 - Bet v 2 - Cuc m 2 - Equ c 3 - Fel d 1 - Hev b 8 - Jug r_pollen - Mer a 1 - Phl p 12 - Pho d 2 - Phod s 1 - Raj c,2
Act d 1 - Alt a 1 - Amb a 1 - Bet v 1 - Cla h 8 - Cor a 1.0103 - Cyn d - Cyn d 1 - Fag s 1 - Fel d 1 - Lol p 1 - Mal d 1 - Ost e - Pas n - Phl p 1 - Phl p 2 - Phl p 5.0101 - Phl p 6 - Pis v 4_RUO - Pop n - Sec c_flour - Sec c_pollen,2
Alt a 1 - Fel d 1 - Mes a 1_RUO,2
Asp f 6,2
Alt a 1 - Can f_Fd1 - Fel d 1 - Phl p 2,2
Aca s - Alt a 1 - Amb a - Amb a 1 - Art v - Art v 1 - Can f 1 - Can f 4 - Der f 1 - Der f 2 - Der p 1 - Der p 2 - Fel d 1 - Fel d 7 - Gly d 2 - Mala s 6 - Phl p 2,2
Alt a 1 - Amb a - Amb a 1 - Amb a 4 - Ara h 9 - Art v - Art v 1 - Art v 3 - Cry j 1 - Cup a 1 - Fel d 1 - Mal d 3 - Phl p 2 - Pru p 3 - Vit v 1 - Zea m - Zea m 14,2
Alt a 1 - Amb a - Amb a 1 - Cyn d - Cyn d 1 - Fel d 1 - Lol p 1 - Phl p 1,2
Alt a 1 - Amb a - Amb a 1 - Bet v 1 - Cry j 1 - Cuc m 2 - Fag s 1 - Ory c 1 - Ory c 2 - Ory c 3 - Phl p 12,2
Alt a 1 - Amb a - Amb a 1 - Amb a 4 - Art v - Art v 1 - Art v 3 - Can s - Che q - Cic a - Cry j 1 - Cyn d - Fag e - Par j - Pas n - Pers a - Pha v - Phr c - Pla a 2 - Pop n - Sec c_pollen - Ulm c,2
Aca s - Alt a 1 - Amb a 1 - Api m - Api m 1 - Der f 1 - Der f 2 - Der p 1 - Der p 2 - Der p 23 - Der p 5 - Equ c 1 - Fel d 1 - Fel d 4 - Fel d 7 - Lep d 2 - Tyr p,2
Alt a 1 - Amb a - Amb a 1 - Cyn d 1 - Lol p 1 - Phl p 1,2
Alt a 1 - Can f 1 - Can f_male urine - Cyn d - Cyn d 1 - Der p 23 - Der p 5 - Fel d 1 - Fel d 7 - Lol p 1 - Mes a 1_RUO - Pas n - Phl p 1,2
Aln g 1 - Alt a 1 - Amb a - Amb a 1 - Api g 1 - Ara h 8 - Bet v 1 - Can f 1 - Can f 2 - Can f 4 - Can f 6 - Can f_male urine - Cor a 1.0103 - Cor a 1.0401 - Cor a_pollen - Cry j 1 - Cuc m 2 - Cyn d - Cyn d 1 - Dau c - Dau c 1 - Der f 1 - Der p 1 - Equ c 1 - Fag s 1 - Fel d 1 - Fel d 4 - Fel d 7 - Fra a 1+3 - Jug r_pollen - Lol p 1 - Mal d 1 - Mala s 6 - Mus m 1 - Ory c 3 - Phl p 1 - Phl p 12 - Ph…
Alt a 1 - Der f 2 - Der p 2 - Der p 23,2
Alt a 1 - Amb a - Amb a 1 - Amb a 4 - Art v - Art v 1 - Bet v 2 - Cry j 1 - Cuc m 2 - Cup a 1 - Fel d 1 - Fic c - Hev b 8 - Jug r_pollen - Mer a 1 - Phl p 12 - Pho d 2 - Ves v - Ves v 5,2
Alt a 1 - Amb a 1 - Fel d 1 - Phl p 2,2
Asp f 6 - Mala s 11 - Ves v 5,2
Alt a 1 - Art v - Art v 1 - Cup a 1 - Fel d 1,2
Aln g 1 - Alt a 1 - Bet v 1 - Cor a 1.0401 - Der f 2 - Der p 2 - Fel d 1 - Lep d 2,2
Alt a 1 - Amb a - Amb a 1 - Asp f 3 - Can f 1 - Can f 2 - Can f 4 - Can f 6 - Cry j 1 - Fel d 7 - Jug r 1 - Ory c 3 - Phl p 2,2
Alt a 1 - Amb a - Amb a 1 - Cla h 8 - Lol p 1 - Phl p 1 - Phl p 2,2
Alt a 1 - Amb a - Amb a 1 - Fel d 1 - Lol p 1 - Phl p 1,2
Alt a 1 - Cla h 8 - Fel d 1,2
Alt a 1 - Der f 1 - Der f 2 - Der p 2,2
Aca m - Act d 1 - Act d 10 - Ail a - Aln g 1 - Ama r - Amb a - Amb a 1 - Ana o - Ana o 2 - Ana o 3 - Api g 1 - Api g 2 - Api m - Ara h 1 - Ara h 2 - Ara h 3 - Ara h 6 - Ara h 8 - Ara h 9 - Art v - Art v 3 - Ave s - Ber e - Bet v 1 - Bet v 2 - Bet v 6 - Can f 1 - Can s 3 - Car i - Che q - Cic a - Clu h 1 - Cor a 1.0103 - Cor a 1.0401 - Cor a 11 - Cor a 14 - Cor a 8 - Cor a 9 - Cor a_pollen - Cry j…
Alt a 1 - Ost e,2
Alt a 1 - Phl p 2 - Ves v 5,2
Alt a 1 - Ves v - Ves v 5,2
Alt a 1 - Amb a - Amb a 1 - Amb a 4 - Art v - Art v 1 - Cry j 1 - Fel d 1 - Phl p 2,2
Ach d - Mala s 5 - Ves v 5,2
Alt a 1 - Fel d 1 - Fel d 4,2
Alt a 1 - Amb a - Amb a 1 - Amb a 4 - Fel d 1 - Raj c,2
Alt a 1 - Can f 1 - Can f 6 - Can f_Fd1 - Equ c 1 - Fel d 1 - Fel d 4 - Fel d 7,2
Alt a 1 - Amb a - Amb a 1 - Can f_Fd1 - Fel d 1 - Phl p 2,2
Act d 2 - Bla g 4 - Bla g 5 - Gly m 5 - Mala s 6,2
Alt a 1 - Der f 1 - Der f 2 - Der p 1 - Der p 2 - Der p 23,2
Alt a 1 - Art v 1 - Cla h 8 - Fel d 1 - Jug r_pollen - Phl p 2,2
Aca m - Ail a - All c - All s - Ama r - Amb a - Amb a 1 - Amb a 4 - Api m - Api m 1 - Ara h 1 - Art v - Art v 1 - Ber e - Bet v 2 - Bro pa - Can f_male urine - Can s - Cap a - Car c - Car i - Che a - Che q - Cic a - Cit s - Cla h 8 - Cor a 11 - Cry j 1 - Cuc m 2 - Cuc p - Cup a 1 - Cyn d - Cyn d 1 - Fag e - Fel d 1 - Fic b - Fic c - Fra e - Hel a - Hev b 8 - Hom s LF - Hor v - Jug r 2 - Jug r 6 -…
Alt a 1 - Bos d_meat - Equ c_meat,2
Alt a 1 - Fel d 1 - Jug r_pollen,2
Asp f 6 - Mala s 11 - Mala s 5,2
Alt a 1 - Art v 1 - Phl p 2,2
Alt a 1 - Amb a - Amb a 1 - Can f 1 - Can f 6 - Can f_Fd1 - Equ c 1 - Fel d 1 - Fel d 7 - Mes a 1_RUO,2
Alt a 1 - Par j 2 - Phl p 2 - Pru p 3,2
Alt a 1 - Amb a - Amb a 1 - Art v 1 - Der f 2 - Der p 2 - Der p 21 - Der p 23 - Der p 5 - Der p 7 - Fel d 1,2
Alt a 1 - Can f_Fd1 - Fel d 1 - Lol p 1 - Phl p 1 - Phl p 5.0101 - Sec c_pollen,2
Ana o 2 - Ara h 1 - Asp f 4 - Asp f 6 - Ave s - Cla h - Cla h 8 - Der f 1 - Der f 2 - Der p 1 - Der p 2 - Der p 23 - Gal d 4 - Lep d 2 - Sin,2
Asp f 6 - Mala s 11,2
Alt a 1 - Cla h 8 - Phl p 1 - Phl p 2,2
Aln g 1 - Alt a 1 - Bet v 1 - Cor a 1.0103 - Cor a 1.0401 - Cor a_pollen - Fag s 1 - Lol p 1 - Phl p 1 - Pol d - Pol d 5 - Thu a 1 - Urt d - Ves v - Ves v 5,1
Aca m - Aca s - Ach d - Ani s 3 - Ara h 15 - Arg r 1 - Blo t 10 - Blo t 21 - Blo t 5 - Bos d 4 - Can f 6 - Can f_Fd1 - Cav p 1 - Chi spp. - Cor a 1.0103 - Cra c 6 - Der f 2 - Der p 10 - Der p 11 - Der p 2 - Der p 21 - Der p 23 - Der p 5 - Fel d 1 - Gad m - Gal d 1 - Gly d 2 - Hev b 3 - Hom g - Lep d 2 - Lit s - Loc m - Lol spp. - Mal d 2 - Mala s 5 - Mel g - Mes a 1_RUO - Mus m 1 - Myt e - Ory c …
Ara h 1 - Asp f 6 - Can f 1 - Can f 6 - Can f_male urine - Cic a - Equ c 1 - Fel d 1 - Fel d 4 - Fel d 7 - Len c - Lup a - Mala s 11 - Mala s 5 - Pen m 1 - Pis s - Sus d 1 - Sus d_epithelia - Ten m,1
Alt a 1 - Amb a - Amb a 1 - Can f 1 - Can f 3 - Can f 4 - Can f 6 - Cav p 1 - Equ c 3 - Fel d 1 - Fel d 2 - Fel d 4 - Fel d 7 - Gal d_meat - Jug r 4 - Phl p 2 - Sus d 1 - Sus d_epithelia - Thu a 1,1
Ach d - Asp f 3 - Pla a 1 - Pol d - Pol d 5 - Ten m - Ves v - Ves v 5,1
Ach d - Alt a 1 - Amb a - Amb a 1 - Bos d 2 - Can f 1 - Can f 4 - Can f 6 - Can f_Fd1 - Can f_male urine - Cav p 1 - Cry j 1 - Equ c 1 - Fel d 1 - Fel d 4 - Fel d 7 - Gal d 1 - Gal d 5 - Gal d_white - Gal d_yolk - Mala s 6 - Mel g - Mus m 1 - Ory c 1 - Ory c 3 - Par j 2 - Pha v - Phl p 2 - Pop n - Rat n - Sal k - Sal s 1 - Sec c_flour - Ses i 1 - Sin a 1 - Sol t - Ten m,1
Aca m - Ach d - Act d 1 - Act d 10 - Act d 2 - Ail a - All c - All s - Aln g 1 - Alt a 1 - Ama r - Amb a - Amb a 1 - Ana o - Api g 2 - Api g 6 - Api m - Api m 1 - Ara h 1 - Ara h 3 - Ara h 8 - Ara h 9 - Art v - Art v 1 - Art v 3 - Ave s - Ber e - Bet v 1 - Bet v 2 - Blo t 10 - Bro pa - Can f 1 - Can f 2 - Can f 4 - Can f_Fd1 - Can s - Can s 3 - Cap a - Car c - Car i - Car p - Cav p 1 - Che a - Ch…
Aln g 1 - Alt a 1 - Amb a 1 - Api g 6 - Ara h 1 - Ara h 2 - Bet v 1 - Bla g 2 - Blo t 10 - Blo t 21 - Bos d 6 - Bos d_meat - Can f 1 - Can f 3 - Can f 6 - Can f_Fd1 - Can s 3 - Cap h_epithelia - Cla h - Cor a 1.0103 - Cor a_pollen - Cra c 6 - Der f 2 - Der p 1 - Der p 10 - Der p 2 - Der p 23 - Der p 7 - Equ c 1 - Equ c 3 - Equ c 4 - Equ c_meat - Fag s 1 - Fel d 1 - Fel d 2 - Fel d 4 - Fel d 7 - F…
Aca m - Act d 10 - Ail a - Alt a 1 - Ama r - Amb a - Amb a 1 - Amb a 4 - Api g 2 - Ara h 8 - Art v - Art v 1 - Art v 3 - Asp f 3 - Ave s - Bet v 1 - Bet v 2 - Can f 1 - Can f_Fd1 - Can s - Can s 3 - Che a - Cor a 1.0103 - Cor a 1.0401 - Cry j 1 - Cuc m 2 - Cyn d - Cyn d 1 - Fag s 1 - Fel d 1 - Fel d 7 - Fra a 1+3 - Gly m 4 - Hev b 8 - Hor v - Jug r_pollen - Lol p 1 - Mal d 1 - Mal d 3 - Mala s 6 …
Alt a 1 - Amb a - Amb a 1 - Ber e - Bet v 1 - Blo t 10 - Cor a 1.0401 - Cyn d - Cyn d 1 - Der f 1 - Der f 2 - Der p 1 - Der p 2 - Der p 23 - Fel d 1 - Fra a 1+3 - Lep d 2 - Lol p 1 - Pas n - Phl p 1,1
Aln g 1 - Alt a 1 - Amb a - Amb a 1 - Api g 1 - Ara h 8 - Asp f 3 - Bet v 1 - Bla g 4 - Can f 1 - Can f 2 - Can f 3 - Can f 4 - Can f 6 - Can f_Fd1 - Can f_male urine - Cav p 1 - Cor a 1.0103 - Cor a 1.0401 - Cor a_pollen - Cup a 1 - Dau c - Dau c 1 - Der p 5 - Equ c 1 - Equ c 3 - Equ c_meat - Equ c_milk - Fag s 1 - Fel d 1 - Fel d 2 - Fel d 4 - Fel d 7 - Fic c - Fra a 1+3 - Gal d 4 - Mal d 1 - M…
Alt a 1 - Amb a 1 - Api m 1 - Art v 1 - Lol p 1 - Phl p 1 - Phl p 2,1
Alt a 1 - Ama r - Amb a - Amb a 1 - Amb a 4 - Api m 1 - Art v - Art v 1 - Bet v 2 - Can f 1 - Can f 6 - Can f_Fd1 - Can s - Cla h 8 - Cry j 1 - Cuc m 2 - Cyn d - Equ c 1 - Fel d 1 - Fel d 4 - Fel d 7 - Hev b 8 - Jug r_pollen - Mala s 6 - Mer a 1 - Phl p 12 - Phl p 2 - Pho d 2 - Phr c - Pla a 2 - Sec c_pollen,1
Alt a 1 - Amb a 4 - Art v,1
Act d 1 - Act d 10 - Aln g 1 - Alt a 6 - Amb a - Amb a 1 - Ana o - Ana o 3 - Api g 2 - Api g 6 - Ara h 1 - Ara h 8 - Ara h 9 - Art v - Art v 3 - Ave s - Ber e - Bet v 1 - Bos d 4 - Bos d 5 - Bos d 6 - Bos d 8 - Bos d_milk - Cam d - Can f 1 - Can f 2 - Can f 3 - Can f 6 - Can s 3 - Cap h_epithelia - Cap h_milk - Car i - Che q - Cic a - Cla h 8 - Clu h - Clu h 1 - Cor a 1.0103 - Cor a 11 - Cor a 14…
Act d 1 - Aln g 1 - Alt a 1 - Ana o - Ana o 3 - Api g 1 - Ara h 1 - Ara h 8 - Asp f 3 - Ave s - Ber e - Bet v 1 - Can s 3 - Car i - Che q - Cic a - Cor a 1.0103 - Cor a 1.0401 - Cor a 11 - Cor a 14 - Cor a 8 - Cor a 9 - Cor a_pollen - Cuc p - Dau c - Dau c 1 - Equ c 1 - Fag e - Fag s 1 - Fel d 1 - Fra a 1+3 - Gal d 4 - Gal d_white - Gly m 4 - Gly m 6 - Hel a - Jug r 1 - Jug r 2 - Jug r 4 - Jug r …
Aca m - Ail a - All c - All s - Aln g 1 - Alt a 1 - Ama r - Amb a - Amb a 1 - Amb a 4 - Api g 1 - Ara h 1 - Ara h 8 - Art v - Art v 1 - Asp f 3 - Bet v 1 - Bro pa - Can f 1 - Can f_Fd1 - Cap a - Car c - Car i - Che q - Cic a - Cla h - Cla h 8 - Cor a 1.0103 - Cor a 1.0401 - Cor a 11 - Cor a_pollen - Cry j 1 - Cuc p - Cup a 1 - Cup s - Dau c - Dau c 1 - Fag e - Fag s 1 - Fel d 1 - Fic b - Fic c - …
Act d 2 - Aln g 1 - Alt a 1 - Amb a - Amb a 1 - Amb a 4 - Api g 1 - Art v - Art v 1 - Asp f 3 - Bet v 1 - Can f 1 - Can f_male urine - Cor a 1.0103 - Cor a 1.0401 - Cor a_pollen - Cry j 1 - Cyn d - Cyn d 1 - Dau c - Dau c 1 - Fag s 1 - Fel d 1 - Fel d 4 - Fel d 7 - Fra a 1+3 - Lol p 1 - Mal d 1 - Mala s 11 - Mala s 5 - Mes a 1_RUO - Ory c 1 - Phl p 1 - Phl p 2 - Sec c_pollen - Vac m,1
Api m - Api m 10 - Asp f 6 - Bla g 4 - Can f 1 - Can f_Fd1 - Cla h - Fel d 1 - Fel d 7 - Lup a - Mala s 11 - Mala s 6 - Par j 2,1
Amb a 4 - Ana o - Ana o 3 - Art v - Art v 1 - Asp f 6 - Bos d 6 - Can f 1 - Can f 2 - Can f 3 - Can f 4 - Can f 6 - Can s 3 - Cap h_epithelia - Equ c 1 - Equ c 3 - Equ c_meat - Equ c_milk - Fel d 2 - Fel d 4 - Fel d 7 - Fra a 1+3 - Gal d 5 - Gal d_white - Mala s 11 - Myt e - Ovi a_meat - Rat n - Sus d 1 - Sus d_epithelia,1
Aca s - Aln g 1 - Alt a 1 - Amb a - Amb a 4 - Api g 1 - Art v - Art v 1 - Bet v 1 - Blo t 5 - Can f 1 - Can f 6 - Cor a 1.0103 - Cor a 1.0401 - Cor a_pollen - Cyn d - Cyn d 1 - Dau c - Dau c 1 - Der f 1 - Der f 2 - Der p 1 - Der p 2 - Der p 21 - Der p 23 - Der p 5 - Der p 7 - Dol spp - Equ c 1 - Fag s 1 - Fel d 1 - Fel d 4 - Fel d 7 - Gly d 2 - Lep d 2 - Lol p 1 - Pas n - Phl p 1 - Phl p 2 - Phr …
Act d 1 - Ail a - Aln g 1 - Amb a - Amb a 1 - Amb a 4 - Ana o - Api g 1 - Ara h 1 - Ara h 8 - Art v - Art v 1 - Ber e - Bet v 1 - Bet v 6 - Can f 1 - Can f 6 - Can f_male urine - Can s - Car i - Car p - Che q - Cic a - Clu h - Clu h 1 - Cor a 1.0103 - Cor a 1.0401 - Cor a 11 - Cor a 9 - Cor a_pollen - Cry j 1 - Cuc p - Cyn d - Cyp c 1 - Dau c - Dau c 1 - Equ c 1 - Fag e - Fag s 1 - Fel d 1 - Fel …
Aca s - Ach d - Act d 2 - Alt a 1 - Bet v 2 - Blo t 21 - Blo t 5 - Can f_male urine - Cra c 6 - Cuc m 2 - Cyn d - Cyn d 1 - Der f 1 - Der p 1 - Der p 21 - Der p 23 - Der p 5 - Equ c 3 - Fel d 1 - Hev b 3 - Hev b 8 - Mer a 1 - Phl p 12 - Phl p 2 - Pho d 2 - Ten m - Tyr p,1
Aca m - Aca s - Act d 10 - Ail a - All c - All s - Alt a 1 - Ama r - Amb a - Amb a 1 - Api g 2 - Api g 6 - Ara h 9 - Art v - Art v 3 - Ave s - Ber e - Bet v 6 - Bro pa - Can s - Can s 3 - Cap a - Car c - Car i - Car p - Che a - Che q - Cic a - Cit s - Cor a 8 - Cry j 1 - Cuc p - Cup a 1 - Cup s - Cyn d - Dau c - Der f 1 - Der f 2 - Der p 1 - Der p 2 - Der p 23 - Der p 7 - Fag e - Fag e 2 - Fel d …
Api m - Api m 1 - Ara h 15 - Asp f 6 - Can f 1 - Fel d 1 - Mala s 11 - Mala s 5 - Mes a 1_RUO - Mus m 1 - Rat n,1
Aca s - Amb a - Amb a 1 - Amb a 4 - Blo t 5 - Can f 6 - Can f_Fd1 - Cyn d - Cyn d 1 - Der f 1 - Der f 2 - Der p 1 - Der p 2 - Der p 21 - Der p 23 - Der p 5 - Der p 7 - Fel d 1 - Fel d 4 - Gly d 2 - Gly m 5 - Lep d 2 - Lol spp. - Mala s 6 - Myt e - Tyr p,1
Aca m - Aln g 1 - Alt a 1 - Ama r - Amb a - Amb a 1 - Api g 1 - Ara h 8 - Art v - Art v 3 - Bet v 1 - Bet v 2 - Cor a 1.0103 - Cor a 1.0401 - Cor a_pollen - Cry j 1 - Cuc m 2 - Cyn d - Cyn d 1 - Dau c - Dau c 1 - Dol spp - Equ c 3 - Fag s 1 - Fra a 1+3 - Gly m 4 - Hev b 8 - Hom s LF - Jug r_pollen - Lol p 1 - Mal d 1 - Mer a 1 - Mus m 1 - Pas n - Phl p 1 - Phl p 12 - Phl p 2 - Phl p 5.0101 - Phl …
Act d 1 - Act d 10 - Aln g 1 - Alt a 6 - Amb a - Amb a 1 - Ana o - Ana o 3 - Api g 2 - Api g 6 - Ara h 1 - Ara h 9 - Art v - Art v 3 - Ave s - Ber e - Bet v 1 - Bos d 4 - Bos d 5 - Bos d 6 - Bos d 8 - Bos d_milk - Cam d - Can f 1 - Can f 2 - Can f 3 - Can f 6 - Can s 3 - Cap h_epithelia - Cap h_milk - Car i - Che q - Cic a - Cla h 8 - Clu h - Clu h 1 - Cor a 1.0103 - Cor a 11 - Cor a 14 - Cor a 8…
Act d 2 - All s - Aln g 1 - Alt a 1 - Amb a - Amb a 1 - Api g 1 - Ara h 8 - Bet v 1 - Can f 3 - Can f_Fd1 - Cap h_epithelia - Cor a 1.0103 - Cor a 1.0401 - Cor a_pollen - Cyn d - Cyn d 1 - Dau c 1 - Equ c 3 - Fag s 1 - Fel d 1 - Fel d 2 - Fel d 4 - Fel d 7 - Fra a 1+3 - Jug r_pollen - Lol p 1 - Mal d 1 - Mala s 6 - Ory c 3 - Ory_meat - Pha v - Phl p 1 - Phl p 2 - Phl p 5.0101 - Phl p 6 - Pop n - …
Act d 10 - Alt a 1 - Amb a - Amb a 1 - Cav p 1 - Cla h 8 - Der f 2 - Der p 2 - Fel d 1 - Fra a 1+3 - Hom s LF - Jug r_pollen - Mal d 3 - Pla a 3 - Pru p 3 - Vit v 1 - Zea m - Zea m 14,1
Act d 1 - Act d 10 - Aln g 1 - Aln g 4 - Ana o - Ani s 3 - Api g 1 - Api m 1 - Ara h 8 - Ara h 9 - Art v - Art v 1 - Art v 3 - Asp f 6 - Ave s - Bet v 1 - Bet v 6 - Bla g 4 - Bos d 4 - Bos d 5 - Bos d 6 - Bos d 8 - Bos d_milk - Can f 1 - Can f 4 - Can f 6 - Can f_Fd1 - Cap h_epithelia - Cap h_milk - Car i - Cav p 1 - Clu h - Clu h 1 - Cor a 1.0103 - Cor a 1.0401 - Cor a 11 - Cor a 14 - Cor a 8 - …
Cla h 8 - Gad m 1 - Phl p 1,1
Aca m - Act d 1 - Act d 10 - All s - Aln g 1 - Ama r - Amb a - Amb a 1 - Amb a 4 - Api g 1 - Api g 2 - Api m 10 - Ara h 8 - Ara h 9 - Art v - Art v 1 - Art v 3 - Bet v 1 - Bet v 2 - Bla g 4 - Blo t 10 - Can f 6 - Can s - Car i - Cic a - Clu h - Clu h 1 - Cor a 1.0103 - Cor a 1.0401 - Cor a_pollen - Cry j 1 - Cuc m 2 - Cyn d - Cyn d 1 - Cyp c 1 - Dau c - Dau c 1 - Der p 23 - Equ c 1 - Fag s 1 - Fe…
Aca m - Act d 1 - Act d 10 - Ail a - All s - Aln g 1 - Ama r - Amb a - Amb a 1 - Api g 1 - Ara h 8 - Art v - Bet v 1 - Bla g 2 - Bla g 4 - Bro pa - Can f 4 - Can f 6 - Can f_Fd1 - Cap a - Cor a 1.0103 - Cor a 1.0401 - Cor a 11 - Cor a_pollen - Cry j 1 - Cup a 1 - Cup s - Dau c - Dau c 1 - Der f 1 - Der f 2 - Der p 1 - Der p 2 - Der p 21 - Der p 23 - Equ c 1 - Fag s 1 - Fel d 1 - Fic b - Fic c - F…
Ach d - Ara h 15 - Art v - Art v 1 - Bla g 9 - Bos d_meat - Chi spp. - Cla h 8 - Cor a 11 - Cor a 9 - Cuc p - Cup s - Der p 20 - Hom g - Loc m - Pas n - Per a - Pha v - Pis s - Pis v 3 - Pol d - Sol spp. - Ten m - Ves v - Zea m 14,1
Aca m - Act d 10 - Ail a - All c - All s - Aln g 1 - Alt a 1 - Ama r - Amb a - Amb a 1 - Amb a 4 - Api g 1 - Api g 2 - Api g 6 - Ara h 1 - Ara h 8 - Ara h 9 - Art v - Art v 1 - Art v 3 - Asp f 3 - Bet v 1 - Bet v 2 - Bet v 6 - Bro pa - Can f 2 - Can f 4 - Can f 6 - Can f_male urine - Can s - Can s 3 - Cap a - Car i - Car p - Che a - Che q - Cic a - Cor a 1.0103 - Cor a 1.0401 - Cor a 11 - Cor a 8…
Aca s - Ach d - Aln g 1 - Amb a - Amb a 1 - Ani s 3 - Api g 1 - Ara h 6 - Ara h 8 - Arg r 1 - Asp f 4 - Bet v 1 - Bet v 2 - Bla g 9 - Blo t 10 - Blo t 5 - Bos d 6 - Can f 1 - Can f 3 - Can f 4 - Can f 6 - Can f_male urine - Cap h_epithelia - Chi spp. - Cor a 1.0103 - Cor a 1.0401 - Cor a_pollen - Cra c 6 - Cry j 1 - Cuc m 2 - Cup a 1 - Der f 1 - Der f 2 - Der p 1 - Der p 10 - Der p 2 - Der p 20 -…
Ach d - Amb a - Art v - Asp f 1 - Bet v 1 - Bos d_meat - Can f 1 - Can f_Fd1 - Can f_male urine - Can s - Cor a 1.0103 - Cor a 1.0401 - Cor a_pollen - Cyn d - Equ c_meat - Fag s 1 - Fel d 1 - Fel d 7 - Fra a 1+3 - Gly m 4 - Loc m - Lol spp. - Mal d 1 - Mala s 6 - Per a - Phr c - Pop n - Sec c_pollen - Ten m - Ves v 1 - Zea m 14,1
Aca m - Act d 1 - Act d 10 - Act d 2 - Ail a - All c - All s - Aln g 1 - Aln g 4 - Ama r - Amb a - Amb a 1 - Amb a 4 - Ana o - Api g 1 - Api g 2 - Api g 6 - Ara h 1 - Ara h 2 - Ara h 3 - Ara h 6 - Ara h 8 - Ara h 9 - Art v - Art v 1 - Art v 3 - Ave s - Ber e - Bet v 1 - Bet v 2 - Bet v 6 - Bla g 4 - Blo t 5 - Bos d 4 - Bos d 6 - Bro pa - Can f 1 - Can f 2 - Can f 3 - Can f 4 - Can f 6 - Can f_Fd1…
Ach d - Act d 2 - Alt a 1 - Api m - Cyn d 1 - Loc m - Lol p 1 - Phl p 1 - Phl p 2 - Ten m - Vac m,1
Aca s - Act d 10 - Act d 2 - All s - Aln g 1 - Aln g 4 - Amb a - Amb a 1 - Ana o - Ana o 2 - Ani s 3 - Api g 2 - Api g 6 - Ara h 1 - Ara h 2 - Ara h 3 - Ara h 6 - Ara h 8 - Ara h 9 - Arg r 1 - Art v - Art v 3 - Ave s - Ber e - Bet v 1 - Bet v 6 - Bla g 4 - Blo t 10 - Blo t 5 - Bos d 4 - Bos d 5 - Bos d 8 - Bos d_milk - Can f 1 - Can f 6 - Can f_Fd1 - Can f_male urine - Can s - Can s 3 - Cap a - C…
Aln g 1 - Alt a 6 - Amb a - Amb a 1 - Amb a 4 - Ana o 2 - Ani s 3 - Api m - Api m 10 - Ara h 8 - Art v - Art v 1 - Asp f 1 - Asp f 6 - Bet v 1 - Bet v 2 - Bla g 2 - Bla g 4 - Can f 1 - Can f_Fd1 - Che a 1 - Cla h - Cla h 8 - Cor a 1.0103 - Cor a 1.0401 - Cor a_pollen - Cry j 1 - Cuc m 2 - Cyn d 1 - Der f 2 - Der p 2 - Der p 23 - Der p 5 - Equ c 1 - Fag s 1 - Fel d 1 - Fel d 4 - Fel d 7 - Gly m 4 …
Alt a 1 - Cla h 8 - Cyn d - Cyn d 1 - Der f 1 - Der f 2 - Der p 1 - Der p 2 - Der p 23 - Der p 5 - Der p 7 - Fel d 1 - Gly d 2 - Lep d 2 - Lol p 1 - Mes a 1_RUO - Pas n - Phl p 1 - Phl p 2 - Phl p 5.0101 - Phl p 6 - Phr c - Sec c_pollen,1
Aca s - Ach d - Ani s 3 - Ara h 6 - Asp f 3 - Asp f 4 - Blo t 10 - Can f_male urine - Chi spp. - Cra c 6 - Der f 1 - Der f 2 - Der p 1 - Der p 10 - Der p 2 - Der p 23 - Gly d 2 - Hom g - Lep d 2 - Lit s - Loc m - Lol p 1 - Lol spp. - Myt e - Ost e - Pan b - Pen m 1 - Per a - Per a 7 - Phl p 1 - Pol d 5 - Rud spp. - Ten m - Tyr p - Vac m - Ves v - Ves v 5,1
Aca s - Ach d - Api m - Api m 1 - Asp f 6 - Cyn d 1 - Loc m - Lol spp. - Myt e - Ost e - Phl p 1 - Sec c_flour - Ten m - Tri a 19 - Tri a aA_TI - Tri s - Tyr p - Ves v 5,1
Ach d - Act d 2 - Alt a 1 - Ara h 8 - Bet v 1 - Can f_Fd1 - Cor a 1.0103 - Cor a 1.0401 - Cor a_pollen - Cyn d - Cyn d 1 - Der f 1 - Der f 2 - Der p 1 - Der p 2 - Der p 23 - Der p 7 - Fag s 1 - Fel d 1 - Fra a 1+3 - Gly m 4 - Lep d 2 - Loc m - Lol p 1 - Mal d 1 - Mala s 6 - Pas n - Phl p 1 - Pol d - Pol d 5 - Ten m - Ves v 5,1
Aca s - Ach d - Act d 5 - Alt a 1 - Amb a - Amb a 1 - Ana o 3 - Ani s 3 - Ara h 15 - Ara h 2 - Ara h 6 - Arg r 1 - Art v 1 - Asp f 3 - Asp f 4 - Ber e 1 - Bla g 2 - Blo t 10 - Blo t 5 - Bos d 4 - Can f 2 - Can f 6 - Chi spp. - Cic a - Cla h - Cor a 12_RUO - Cra c 6 - Cyp c 1 - Der p 10 - Der p 23 - Der p 5 - Der p 7 - Equ c 3 - Equ c 4 - Fel d 1 - Fel d 2 - Fel d 4 - Gal d 1 - Gal d 5 - Gly d 2 -…
Alt a 1 - Amb a - Amb a 1 - Amb a 4 - Art v - Art v 1 - Sec c_pollen,1
Amb a - Amb a 4 - Art v - Art v 1 - Can f 2 - Can f_Fd1 - Fel d 1 - Mala s 11 - Mala s 5,1
Alt a 1 - Cyn d - Cyn d 1 - Lol p 1 - Phl p 1 - Phl p 2 - Phl p 5.0101 - Sec c_pollen,1
Ach d - Asp f 6 - Bla g 1 - Bla g 4 - Cla h - Fra e 1 - Loc m - Mala s 11 - Mala s 5 - Mala s 6 - Ost e - Par j 2 - Pen ch - Pru p 3 - Sac c - Ten m - Tyr p,1
Ach d - Bla g 9 - Cla h 8 - Der p 20 - Der p 21 - Loc m - Per a - Sol spp. - Ten m - Tyr p - Vac m,1
Alt a 1 - Art v 1 - Cuc p - Pop n,1
Api m - Api m 1 - Api m 10 - Asp f 6 - Bos d_meat - Ost e,1
Amb a - Amb a 1 - Cla h 8 - Cry j 1,1
Act d 2 - Amb a - Amb a 1 - Ana o - Ana o 2 - Ana o 3 - Api m - Api m 1 - Ara h 1 - Ara h 2 - Ara h 3 - Ara h 9 - Arg r 1 - Art v - Art v 3 - Ave s - Ber e - Bet v 2 - Bet v 6 - Bla g 4 - Bos d 6 - Can f_Fd1 - Cap h_epithelia - Car c - Car i - Che q - Cic a - Clu h - Cor a 11 - Cor a 14 - Cor a 9 - Cor a_pollen - Cry j 1 - Cuc m 2 - Cuc p - Cup a 1 - Der f 1 - Der p 1 - Der p 7 - Equ c 3 - Fag e …
Act d 2 - Aln g 1 - Alt a 1 - Amb a - Amb a 1 - Api m 1 - Art v 1 - Bet v 1 - Cor a 1.0103 - Cor a_pollen - Cuc p - Fag s 1 - Fel d 1 - Gad m 1 - Gly m 4 - Hev b 11 - Hev b 6.02 - Jug r_pollen - Mal d 1 - Ory_meat - Pop n - Sal k - Urt d - Vac m,1
Amb a - Amb a 1 - Amb a 4 - Art v - Art v 1 - Can f 1 - Can f_male urine - Cry j 1 - Cuc m 2 - Cyn d - Cyn d 1 - Der p 2 - Der p 23 - Fel d 1 - Fel d 4 - Lep d 2 - Lol p 1 - Mala s 11 - Mus m 1 - Ost e - Phl p 1 - Phl p 12 - Pho d 2 - Phod s 1 - Sec c_pollen,1
Alt a 1 - Amb a - Amb a 1 - Amb a 4 - Art v 1 - Bos d_meat - Cry j 1 - Der f 2 - Der p 2 - Equ c_meat - Ovi a_meat - Phl p 2,1
Act d 10 - All s - Ama r - Amb a - Amb a 1 - Api g 2 - Api g 6 - Api m - Api m 1 - Ara h 9 - Art v - Art v 3 - Can f_Fd1 - Can s - Can s 3 - Cap a - Cla h 8 - Cor a 8 - Cry j 1 - Cyn d - Cyn d 1 - Der f 1 - Der f 2 - Der p 1 - Der p 2 - Der p 21 - Der p 23 - Der p 5 - Fag e - Fel d 1 - Fic b - Fra a 1+3 - Gad m 1 - Gly d 2 - Hel a - Hor v - Jug r 2 - Jug r 3 - Jug r_pollen - Lep d 2 - Lol p 1 - L…
Act d 1 - Act d 10 - Amb a - Amb a 4 - Api m - Api m 1 - Ara h 9 - Art v - Art v 1 - Art v 3 - Asp f 6 - Bla g 4 - Bla g 9 - Can f_Fd1 - Cor a 8 - Fel d 1 - Fic c - Fra a 1+3 - Hev b 6.02 - Jug r 3 - Mal d 3 - Mala s 11 - Mala s 5 - Mala s 6 - Mes a 1_RUO - Ory_meat - Phl p 2 - Pla a 1 - Pla a 3 - Pru p 3 - Sac c - Sin - Sin a 1 - Ves v 5 - Vit v 1,1
Act d 10 - Act d 2 - Alt a 1 - Api g 2 - Asp f 3 - Bet v 1 - Cyn d - Cyn d 1 - Fel d 1 - Phl p 1 - Phl p 2 - Phod s 1 - Pol d 5,1
Aln g 1 - Alt a 1 - Amb a - Amb a 1 - Api g 1 - Ara h 8 - Art v - Bet v 1 - Can f 1 - Can f 2 - Can f 6 - Can f_Fd1 - Cor a 1.0103 - Cor a 1.0401 - Cor a_pollen - Cry j 1 - Cyn d - Cyn d 1 - Fag s 1 - Fel d 1 - Fel d 7 - Fra a 1+3 - Gal d 3 - Gal d_white - Gly m 4 - Lol p 1 - Mal d 1 - Mes a 1_RUO - Pas n - Phl p 1 - Phl p 2 - Phr c - Pyr c - Sal k 1 - Sec c_pollen,1
Alt a 1 - Api m - Api m 1 - Pol d - Pol d 5 - Vac m - Ves v - Ves v 5,1
Aca m - Ail a - Aln g 1 - Aln g 4 - Alt a 1 - Ama r - Amb a - Amb a 1 - Api g 1 - Ara h 8 - Art v - Bet v 1 - Bet v 2 - Bro pa - Can f 6 - Can f_male urine - Che a - Clu h 1 - Cor a 1.0103 - Cor a 1.0401 - Cor a_pollen - Cry j 1 - Cuc m 2 - Cup a 1 - Cyn d - Cyn d 1 - Cyp c 1 - Dau c - Dau c 1 - Fag s 1 - Fel d 1 - Fel d 4 - Fra a 1+3 - Fra e - Gad m - Gad m 1 - Gly m 4 - Hel a - Hev b 8 - Hor v …
Aca s - Ach d - Amb a - Amb a 4 - Ani s 3 - Ara h 6 - Arg r 1 - Art v - Art v 1 - Asp f 4 - Blo t 10 - Blo t 21 - Blo t 5 - Chi spp. - Cyn d 1 - Der f 1 - Der f 2 - Der p 1 - Der p 10 - Der p 2 - Der p 21 - Der p 23 - Der p 5 - Der p 7 - Gly d 2 - Hom g - Lep d 2 - Lit s - Loc m - Lol spp. - Myt e - Ory c 3 - Ost e - Pan b - Pen m 1 - Per a - Per a 7 - Pla a 3 - Rud spp. - Ten m - Tyr p - Tyr p 2…
Aca s - Ach d - Act d 1 - Aln g 4 - Alt a 1 - Amb a - Amb a 1 - Ani s 3 - Ara h 15 - Ara h 6 - Arg r 1 - Art v 1 - Asp f 3 - Asp f 4 - Ber e 1 - Bet v 6 - Bla g 9 - Blo t 10 - Blo t 5 - Bos d 4 - Can f 2 - Can f 6 - Chi spp. - Cla h - Cra c 6 - Cyn d - Cyn d 1 - Cyp c 1 - Der f 1 - Der f 2 - Der p 1 - Der p 10 - Der p 2 - Der p 20 - Der p 21 - Der p 23 - Der p 5 - Der p 7 - Equ c 3 - Fel d 1 - Fe…
Alt a 1 - Ama r - Amb a - Amb a 1 - Amb a 4 - Art v - Art v 1 - Bet v 1 - Can f 1 - Can f 4 - Can f 6 - Can f_Fd1 - Can f_male urine - Cry j 1 - Cup a 1 - Cup s - Cyn d 1 - Fel d 1 - Fel d 7 - Jug r_pollen - Lol p 1 - Phl p 1 - Phl p 2 - Sal k - Sal k 1 - Ves v 5,1
Alt a 1 - Can f_male urine - Cyn d 1 - Der f 2 - Der p 2 - Der p 21 - Der p 23 - Der p 5 - Der p 7 - Gly d 2 - Lep d 2 - Tyr p,1
Act d 2 - Alt a 1 - Api m - Api m 1 - Api m 10 - Asp f 3 - Can f_male urine - Fel d 1 - Mala s 6 - Ory c 3 - Phl p 2,1
Aca s - Ach d - Asp f 6 - Bet v 1 - Blo t 5 - Bos d 6 - Can f 1 - Can f 6 - Clu h - Clu h 1 - Cyp c 1 - Der f 1 - Der f 2 - Der p 1 - Der p 2 - Der p 21 - Der p 23 - Der p 5 - Equ c 1 - Fag s 1 - Fel d 1 - Fel d 4 - Fel d 7 - Fra a 1+3 - Gad m - Gad m 1 - Gad m 2+3 - Gly d 2 - Lep d 2 - Loc m - Mala s 11 - Mes a 1_RUO - Mus m 1 - Ory c 3 - Pen m 4 - Raj c - Raj c Parvalbumin - Rat n - Sal s - Sal…
Aca m - Aca s - Act d 10 - All s - Alt a 1 - Ama r - Amb a - Amb a 1 - Ani s 1 - Ani s 3 - Ara h 1 - Ara h 9 - Art v - Art v 1 - Art v 3 - Asp f 3 - Bet v 2 - Blo t 10 - Blo t 5 - Bos d 4 - Bos d 5 - Can s - Che a - Clu h 1 - Cor a_pollen - Cry j 1 - Cuc m 2 - Cuc p - Cup a 1 - Cyn d - Cyn d 1 - Der f 1 - Der f 2 - Der p 1 - Der p 10 - Der p 2 - Der p 21 - Der p 23 - Der p 5 - Der p 7 - Equ c 3 -…
Act d 10 - Amb a - Amb a 1 - Art v - Bla g 4 - Can f 1 - Can f_Fd1 - Can f_male urine - Cic a - Cry j 1 - Cyn d - Cyn d 1 - Fel d 1 - Fel d 4 - Fel d 7 - Lol p 1 - Lup a - Mala s 11 - Mala s 6 - Mes a 1_RUO - Ory c 3 - Pas n - Phl p 1 - Phl p 5.0101 - Phr c - Sec c_pollen,1
Aca s - Ach d - Act d 1 - Act d 5 - Alt a 1 - Ama r - Amb a - Amb a 1 - Ani s 3 - Ara h 1 - Ara h 2 - Arg r 1 - Art v - Art v 1 - Ber e 1 - Bet v 1 - Bet v 6 - Bla g 1 - Bla g 2 - Bla g 4 - Blo t 10 - Blo t 21 - Bos d 4 - Can f 1 - Can f 2 - Can f 6 - Can f_Fd1 - Car i - Chi spp. - Cla h - Clu h - Clu h 1 - Cor a 1.0103 - Cor a 1.0401 - Cor a_pollen - Cyp c 1 - Dau c 1 - Der f 1 - Der f 2 - Der p…
Alt a 6 - Amb a - Amb a 1 - Amb a 4 - Cry j 1 - Equ c 1 - Fel d 1 - Mus m 1,1
Alt a 1 - Bos d 6 - Can f 1 - Can f 3 - Can f 4 - Can f_Fd1 - Can f_male urine - Cav p 1 - Der f 1 - Der f 2 - Der p 1 - Der p 2 - Der p 21 - Der p 7 - Equ c 3 - Equ c_meat - Fel d 1 - Fel d 2 - Fel d 7 - Gly d 2 - Lep d 2 - Ory_meat - Ovi a_meat - Sus d 1 - Sus d_epithelia - Tyr p 2,1
Aca s - Ach d - Act d 1 - Ani s 3 - Blo t 10 - Chi spp. - Cyn d - Cyn d 1 - Der f 1 - Der f 2 - Der p 1 - Der p 10 - Der p 2 - Der p 23 - Der p 5 - Der p 7 - Gal d 3 - Gal d_white - Gly d 2 - Hom g - Lep d 2 - Lit s - Loc m - Lol p 1 - Lol spp. - Mala s 5 - Myt e - Ost e - Pan b - Pas n - Pen m 1 - Per a 7 - Phl p 1 - Phl p 2 - Rud spp. - Ten m - Tyr p - Tyr p 2,1
Aln g 1 - Alt a 1 - Amb a - Amb a 1 - Ani s 3 - Art v - Art v 1 - Bet v 1 - Blo t 10 - Can f 1 - Can f 3 - Can f_Fd1 - Can f_male urine - Der f 1 - Der p 1 - Der p 5 - Fag s 1 - Fel d 1 - Fel d 2 - Fel d 7 - Hev b 6.02 - Ovi a_meat - Pen m 1 - Per a 7 - Pla l 1 - Sus d 1,1
Aca s - Ach d - Act d 5 - Alt a 1 - Amb a - Amb a 1 - Amb a 4 - Ani s 1 - Ani s 3 - Ara h 1 - Ara h 2 - Ara h 6 - Art v - Art v 1 - Asp f 3 - Asp f 4 - Ber e 1 - Bla g 2 - Bla g 9 - Blo t 10 - Blo t 21 - Blo t 5 - Bos d 4 - Bos d 5 - Can f 2 - Can f 6 - Can f_male urine - Chi spp. - Cla h - Cla h 8 - Cor a 12_RUO - Cra c 6 - Cry j 1 - Cuc p - Cyn d 1 - Der f 1 - Der p 1 - Der p 10 - Der p 20 - De…
Aca m - Aln g 1 - Alt a 1 - Alt a 6 - Ama r - Amb a - Amb a 1 - Amb a 4 - Api g 1 - Ara h 8 - Art v - Art v 1 - Asp f 3 - Bet v 1 - Bet v 2 - Cla h - Cla h 8 - Cor a 1.0103 - Cor a 1.0401 - Cor a_pollen - Cuc m 2 - Cyn d - Cyn d 1 - Dau c - Dau c 1 - Fag s 1 - Fel d 1 - Fra a 1+3 - Gly m 4 - Hev b 8 - Jug r_pollen - Lol p 1 - Mal d 1 - Mala s 6 - Mer a 1 - Mes a 1_RUO - Ost e - Phl p 1 - Phl p 12…
Act d 10 - Alt a 1 - Ama r - Amb a - Amb a 1 - Amb a 4 - Art v - Art v 1 - Art v 3 - Bet v 2 - Can f_Fd1 - Can f_male urine - Cry j 1 - Cuc m 2 - Cup a 1 - Cyn d - Fag e - Fel d 1 - Fra a 1+3 - Hev b 8 - Jug r_pollen - Mer a 1 - Pas n - Pers a - Phl p 12 - Pho d 2 - Phr c - Pop n - Pyr c - Sal k - Sec c_pollen - Ulm c - Zea m 14,1
Aln g 1 - Amb a - Amb a 1 - Api m - Ara h 8 - Bet v 1 - Cor a 1.0401 - Cry j 1 - Cyn d - Cyn d 1 - Fag s 1 - Fel d 1 - Fra a 1+3 - Gal d 1 - Gal d 2 - Gal d_white - Gly m 4 - Jug r_pollen - Lol p 1 - Mal d 1 - Mala s 6 - Pas n - Phl p 1 - Phl p 2 - Phl p 5.0101 - Phl p 6 - Phr c - Sal k - Sec c_pollen,1
Act d 1 - Aln g 1 - Alt a 6 - Amb a - Amb a 4 - Api g 1 - Ara h 8 - Art v - Art v 1 - Art v 3 - Asp f 6 - Bet v 1 - Bla g 4 - Can f_male urine - Cor a 1.0103 - Cor a 1.0401 - Cor a_pollen - Cyn d - Cyn d 1 - Cyp c 1 - Dau c - Dau c 1 - Fag s 1 - Fel d 1 - Fra a 1+3 - Gal d_white - Gly m 4 - Lol p 1 - Mal d 1 - Pas n - Phl p 1 - Pru p 3 - Thu a 1,1
Aca s - Ach d - Alt a 1 - Ani s 3 - Ara h 6 - Blo t 10 - Cam d - Chi spp. - Clu h - Der p 10 - Equ c 4 - Hom g - Lit s - Loc m - Lol spp. - Mala s 5 - Myt e - Ory c 3 - Ost e - Pan b - Pec spp. - Pen m 1 - Per a - Per a 7 - Phl p 2 - Rat n - Rud spp. - Sol spp. - Ten m - Tyr p,1
Alt a 1 - Ama r - Amb a - Amb a 1 - Cyn d - Cyn d 1 - Jug r_pollen - Lol p 1 - Phl p 1 - Phl p 2 - Pla l,1
Alt a 1 - Der p 23 - Phl p 2,1
Aln g 1 - Alt a 1 - Bet v 1 - Blo t 5 - Can f 1 - Can f 2 - Can f 3 - Can f 4 - Can f 6 - Can f_Fd1 - Can f_male urine - Cap h_epithelia - Cor a 1.0103 - Cor a 1.0401 - Der f 1 - Der f 2 - Der p 1 - Der p 2 - Der p 21 - Der p 23 - Der p 5 - Der p 7 - Equ c 1 - Equ c 3 - Equ c_meat - Fag s 1 - Fel d 1 - Fel d 2 - Fel d 4 - Fel d 7 - Fra a 1+3 - Lep d 2 - Ory c 3 - Ory_meat - Ovi a_meat - Rat n - S…
Ach d - Act d 1 - All s - Aln g 4 - Ana o - Ber e - Bet v 1 - Bos d 4 - Bos d 5 - Bos d 6 - Bos d 8 - Bos d_meat - Bos d_milk - Can f 1 - Can f 3 - Cap h_epithelia - Cap h_milk - Cic a - Clu h - Clu h 1 - Cor a 11 - Cor a 9 - Cor a_pollen - Cyp c 1 - Der f 1 - Der f 2 - Der p 1 - Der p 2 - Der p 21 - Equ c 3 - Fag e - Fel d 1 - Fel d 2 - Fel d 4 - Fel d 7 - Gad m - Gad m 1 - Gad m 2+3 - Gal d 1 -…
All s - Alt a 1 - Bet v 1 - Cor a 1.0401 - Cyn d - Cyn d 1 - Dol spp - Equ c 3 - Fag s 1 - Lol p 1 - Pas n - Phl p 1 - Phl p 2 - Phl p 5.0101 - Phl p 6 - Phr c - Sec c_pollen,1
Ail a - Alt a 1 - Amb a - Amb a 1 - Amb a 4 - Art v - Art v 1 - Bet v 1 - Bet v 2 - Bet v 6 - Can f_male urine - Cap a - Car i - Che q - Cor a 1.0103 - Cor a 11 - Cry j 1 - Cuc m 2 - Cup a 1 - Cyn d - Fag e - Fag s 1 - Fel d 1 - Fic c - Hel a - Hev b 8 - Hom s LF - Jug r 2 - Jug r 6 - Jug r_pollen - Mer a 1 - Ole e 1 - Pan m - Par j - Pas n - Pers a - Phl p 12 - Phl p 2 - Pho d 2 - Phr c - Pla a …
Aln g 1 - Alt a 1 - Amb a - Amb a 4 - Ara h 8 - Art v - Art v 1 - Bet v 1 - Blo t 5 - Can f 1 - Can f 6 - Cor a 1.0103 - Cor a 1.0401 - Cor a_pollen - Cyn d - Cyn d 1 - Der f 1 - Der f 2 - Der p 1 - Der p 2 - Der p 21 - Der p 5 - Equ c 1 - Fag s 1 - Fel d 1 - Fel d 7 - Fra a 1+3 - Gly d 2 - Gly m 4 - Hel a - Lol p 1 - Mal d 1 - Mus m 1 - Myt e - Ory c 1 - Ory c 3 - Phl p 1 - Phl p 5.0101 - Sec c_…
Aln g 1 - Alt a 1 - Amb a - Amb a 1 - Api g 1 - Ara h 8 - Bet v 1 - Bet v 2 - Cor a 1.0103 - Cor a 1.0401 - Cor a_pollen - Cry j 1 - Cuc m 2 - Cup a 1 - Dau c - Dau c 1 - Der p 23 - Fag s 1 - Fel d 1 - Fra a 1+3 - Gly m 4 - Hev b 8 - Jug r_pollen - Mal d 1 - Mer a 1 - Phl p 12 - Pho d 2 - Pop n - Pyr c - Sal k,1
Aln g 1 - Amb a 1 - Ana o - Ana o 2 - Api g 1 - Ara h 15 - Bet v 1 - Bos d 6 - Can f 1 - Can f 2 - Can f 3 - Can f 4 - Can f 6 - Can f_Fd1 - Can f_male urine - Cap h_epithelia - Cor a 1.0103 - Cor a 1.0401 - Cor a_pollen - Dau c 1 - Der f 2 - Der p 2 - Equ c 1 - Equ c 3 - Equ c_meat - Fag s 1 - Fel d 1 - Fel d 2 - Fel d 7 - Gal d 4 - Gal d 5 - Gal d_white - Gal d_yolk - Hom g - Mal d 1 - Mala s 6…
Aca s - Ach d - Ani s 3 - Api m - Api m 10 - Ara h 6 - Arg r 1 - Asp f 4 - Blo t 10 - Blo t 5 - Chi spp. - Der p 10 - Hom g - Lep d 2 - Lit s - Loc m - Lol spp. - Myt e - Ost e - Pan b - Pec spp. - Pen m 1 - Per a - Per a 7 - Pol d 5 - Rud spp. - Sec c_flour - Ten m - Tri a 19 - Tri s - Tyr p - Vac m,1
Aca s - Act d 2 - Alt a 1 - Can f_Fd1 - Can f_male urine - Fel d 1 - Hev b 6.02 - Lol spp. - Pis v 4_RUO,1
Ach d - Aln g 1 - Alt a 1 - Ama r - Amb a - Amb a 1 - Api g 1 - Api g 2 - Ara h 8 - Bet v 1 - Bet v 2 - Bla g 9 - Cor a 1.0103 - Cor a 1.0401 - Cor a_pollen - Cry j 1 - Cuc m 2 - Cup a 1 - Cyn d - Cyn d 1 - Dau c - Dau c 1 - Der f 1 - Der f 2 - Der p 1 - Der p 2 - Der p 23 - Fag s 1 - Fel d 1 - Fra a 1+3 - Gly d 2 - Gly m 4 - Hev b 8 - Jug r_pollen - Lep d 2 - Mal d 1 - Mal d 3 - Mer a 1 - Pas n …
Ail a - Aln g 1 - Alt a 1 - Amb a - Amb a 1 - Api g 1 - Ara h 8 - Art v - Bet v 1 - Bet v 2 - Che q - Cor a 1.0103 - Cor a 1.0401 - Cor a_pollen - Cry j 1 - Cuc m 2 - Dau c - Dau c 1 - Equ c_meat - Fag s 1 - Fel d 1 - Fra a 1+3 - Gly m 4 - Jug r_pollen - Mal d 1 - Mes a 1_RUO - Phl p 12 - Phl p 2 - Phl p 5.0101 - Pho d 2 - Pol d - Pop n - Sal k - Ves v 5,1
Act d 2 - Alt a 1 - Amb a 1 - Bet v 1 - Can f 1 - Can f 6 - Can f_Fd1 - Cor a 1.0103 - Equ c 1 - Fag s 1 - Fel d 1 - Fel d 4 - Fel d 7 - Ory c 3 - Phl p 2 - Rat n,1
Aln g 1 - Alt a 1 - Amb a - Amb a 1 - Ara h 8 - Art v - Bet v 1 - Cor a 1.0103 - Cor a 1.0401 - Cor a_pollen - Cry j 1 - Cup a 1 - Cyn d - Cyn d 1 - Fag s 1 - Fra a 1+3 - Gly m 4 - Hel a - Lol p 1 - Mal d 1 - Pas n - Phl p 1 - Phod s 1 - Phr c - Sec c_pollen,1
Aln g 1 - Alt a 1 - Api g 1 - Bet v 1 - Can f_Fd1 - Can f_male urine - Cor a 1.0103 - Cor a 1.0401 - Cor a_pollen - Cuc m 2 - Cyn d - Cyn d 1 - Equ c 1 - Fag s 1 - Fel d 1 - Fel d 4 - Fra a 1+3 - Lol p 1 - Mal d 1 - Ory c 3 - Pas n - Phl p 1 - Phl p 2 - Phl p 5.0101 - Phl p 6 - Pho d 2 - Phr c - Sec c_pollen - Ves v 5,1
Alt a 1 - Amb a - Amb a 1 - Bet v 1 - Bos d 6 - Can f 1 - Can f 2 - Can f 3 - Can f 4 - Can f 6 - Cap h_epithelia - Cor a 1.0103 - Cor a 1.0401 - Cry j 1 - Equ c 1 - Equ c 3 - Equ c_meat - Fag s 1 - Fel d 1 - Fel d 2 - Fel d 4 - Fel d 7 - Fra a 1+3 - Gly d 2 - Jug r 4 - Myt e - Ory c 3 - Phl p 2 - Rat n - Sus d 1 - Sus d_epithelia,1
Act d 2 - Alt a 1 - Alt a 6 - Asp f 1 - Bet v 1 - Can f_Fd1 - Clu h - Clu h 1 - Cyp c 1 - Fel d 1 - Gad m - Gad m 1 - Gad m 2+3 - Mes a 1_RUO - Phl p 2 - Raj c Parvalbumin - Sal s - Sal s 1 - Sco s - Sco s 1 - Thu a 1 - Ves v - Ves v 5 - Xip g 1,1
Ach d - Act d 10 - Amb a - Amb a 1 - Amb a 4 - Api g 2 - Ara h 9 - Art v - Art v 1 - Art v 3 - Bet v 1 - Bet v 2 - Bla g 2 - Can f 1 - Can f 2 - Can f 4 - Can f 6 - Can f_male urine - Can s - Can s 3 - Che a 1 - Che q - Cic a - Cor a 8 - Cry j 1 - Cuc m 2 - Cyn d - Cyn d 1 - Fel d 1 - Fra a 1+3 - Hel a - Hev b 8 - Jug r 3 - Jug r_pollen - Lol p 1 - Mal d 3 - Mala s 6 - Mer a 1 - Mor r - Myt e - O…
Alt a 1 - Amb a - Amb a 1 - Amb a 4 - Art v - Art v 1 - Bet v 2 - Cuc m 2 - Cyn d - Fel d 1 - Hev b 8 - Mer a 1 - Phl p 12 - Phl p 2 - Pho d 2,1
Aln g 1 - Alt a 1 - Amb a - Amb a 1 - Amb a 4 - Ara h 8 - Art v - Art v 1 - Bet v 1 - Can f 1 - Can f_Fd1 - Can f_male urine - Cav p 1 - Cor a 1.0103 - Cor a 1.0401 - Cor a_pollen - Cry j 1 - Fag s 1 - Fel d 1 - Fel d 7 - Fra a 1+3 - Gly m 4 - Jug r_pollen - Mal d 1 - Mes a 1_RUO - Phr c - Pop n - Sal k - Sec c_pollen - Ves v 5,1
Aca s - Ach d - Alt a 1 - Ani s 3 - Ara h 6 - Arg r 1 - Art v 1 - Bet v 6 - Blo t 10 - Blo t 21 - Bos d 5 - Cav p 1 - Chi spp. - Clu h - Clu h 1 - Cyp c 1 - Der p 10 - Gad m - Gad m 1 - Gal d_meat - Hom g - Lit s - Loc m - Lol spp. - Mala s 5 - Myt e - Ory c 3 - Ost e - Pan b - Pec spp. - Pen m 1 - Per a - Per a 7 - Phl p 2 - Rat n - Rud spp. - Sal s 1 - Sco s 1 - Sol spp. - Ten m - Thu a 1 - Tyr…
Ach d - Amb a 1 - Ana o 2 - Asp f 1 - Asp f 3 - Che a 1 - Cla h - Cla h 8 - Cyn d - Cyn d 1 - Fag s 1 - Fra a 1+3 - Loc m - Ole e 9 - Pis v 4_RUO - Ten m,1
Ach d - Alt a 1 - Amb a - Amb a 1 - Api m 1 - Can f_Fd1 - Fel d 1 - Loc m - Ten m - Urt d,1
Aln g 1 - Aln g 4 - Api g 1 - Api m - Api m 1 - Ara h 1 - Ara h 2 - Ara h 8 - Bet v 1 - Car i - Cor a 1.0103 - Cor a 1.0401 - Cor a 14 - Cor a_pollen - Dau c - Dau c 1 - Fag e - Fag s 1 - Fra a 1+3 - Jug r 1 - Jug r 2 - Jug r 4 - Jug r 6 - Len c - Mal d 1 - Mala s 11 - Pha v - Pis s,1
Alt a 1 - Amb a - Amb a 1 - Amb a 4 - Api g 6 - Art v - Art v 1 - Art v 3 - Cry j 1 - Cup a 1 - Cyn d - Fel d 1 - Mes a 1_RUO - Phr c - Raj c - Sec c_pollen - Zea m - Zea m 14,1
Alt a 1 - Alt a 6 - Amb a 1 - Api m - Api m 1 - Api m 10 - Bla g 4 - Can f 1 - Can f 2 - Can f 4 - Can f 6 - Cap a - Che q - Cla h - Cla h 8 - Der f 1 - Der p 23 - Equ c 1 - Fel d 1 - Fel d 7 - Fra e 1 - Lol p 1 - Par j 2 - Pha v - Phl p 1 - Phl p 2 - Pop n - Pru p 3 - Urt d,1
Amb a - Amb a 1 - Amb a 4 - Art v - Art v 1 - Bet v 2 - Bla g 1 - Cuc m 2 - Cyn d 1 - Fag e 2 - Fel d 1 - Fic b - Fic c - Lol p 1 - Mer a 1 - Pen ch - Phl p 1 - Phl p 12 - Pho d 2 - Pim a,1
Ach d - Act d 10 - Aln g 1 - Alt a 1 - Amb a - Amb a 1 - Amb a 4 - Ani s 3 - Api g 1 - Ara h 8 - Ara h 9 - Art v - Art v 1 - Asp f 3 - Bet v 1 - Bet v 2 - Blo t 10 - Can f_Fd1 - Can f_male urine - Chi spp. - Cor a 1.0103 - Cor a 1.0401 - Cor a_pollen - Cry j 1 - Cuc m 2 - Cuc p - Dau c - Dau c 1 - Der p 10 - Fag s 1 - Fel d 1 - Fra a 1+3 - Gly m 4 - Hev b 8 - Hom g - Lit s - Loc m - Mal d 1 - Mer…
Aln g 1 - Alt a 1 - Amb a - Amb a 1 - Api g 1 - Ara h 1 - Ara h 8 - Bet v 1 - Bet v 2 - Can f_Fd1 - Cor a 1.0103 - Cor a 1.0401 - Cor a_pollen - Cry j 1 - Cuc m 2 - Cyn d - Cyn d 1 - Dau c - Dau c 1 - Fag s 1 - Fel d 1 - Fel d 4 - Fra a 1+3 - Gad m 1 - Gly m 4 - Hev b 8 - Jug r_pollen - Lol p 1 - Mal d 1 - Mer a 1 - Phl p 1 - Phl p 12 - Pho d 2 - Phr c - Pru p 3 - Sec c_pollen - Zea m 14,1
Act d 1 - Aln g 1 - Amb a - Amb a 4 - Ara h 8 - Art v - Art v 1 - Asp f 6 - Bet v 1 - Can f 1 - Can f_Fd1 - Can f_male urine - Cor a 1.0103 - Cor a 1.0401 - Cor a_pollen - Cyn d - Cyn d 1 - Der f 1 - Der f 2 - Der p 1 - Der p 2 - Der p 5 - Der p 7 - Equ c 1 - Fag s 1 - Fel d 1 - Fel d 4 - Fel d 7 - Fra a 1+3 - Gly d 2 - Gly m 4 - Jug r_pollen - Lep d 2 - Lol p 1 - Mac inte - Mal d 1 - Mal d 3 - M…
Ach d - Amb a - Amb a 1 - Blo t 5 - Bos d 2 - Bos d_meat - Can f 1 - Can f 4 - Can f 6 - Can f_male urine - Cav p 1 - Equ c 1 - Equ c 4 - Equ c_meat - Equ c_milk - Fel d 1 - Fel d 4 - Fel d 7 - Gal d 4 - Hev b 8 - Mala s 6 - Mes a 1_RUO - Ory c 1 - Ory c 3 - Ory_meat - Ost e - Phod s 1 - Sco s - Sus d_meat - Ulm c - Ves v - Ves v 5,1
Aca s - Ach d - Amb a 1 - Ani s 3 - Api m - Ara h 6 - Arg r 1 - Art v 1 - Asp f 3 - Asp f 4 - Blo t 10 - Blo t 21 - Blo t 5 - Bos d 4 - Cam d - Can f 2 - Can f 6 - Chi spp. - Cra c 6 - Cuc p - Cyn d 1 - Der f 1 - Der f 2 - Der p 1 - Der p 10 - Der p 2 - Der p 21 - Der p 23 - Der p 5 - Equ c 3 - Equ c 4 - Fel d 2 - Fel d 4 - Gal d 1 - Gal d 5 - Gly d 2 - Hom g - Lep d 2 - Lit s - Loc m - Lol spp. …
Ach d - Aln g 1 - Alt a 1 - Amb a - Amb a 1 - Api g 1 - Ara h 8 - Art v - Art v 1 - Bet v 1 - Bet v 2 - Can f 1 - Can f 4 - Can f 6 - Can f_male urine - Cor a 1.0103 - Cor a 1.0401 - Cor a_pollen - Cry j 1 - Cuc m 2 - Cup s - Cyn d - Cyn d 1 - Dau c - Dau c 1 - Fag s 1 - Fel d 1 - Fel d 7 - Fra a 1+3 - Hev b 8 - Jug r_pollen - Loc m - Lol p 1 - Mal d 1 - Mer a 1 - Mes a 1_RUO - Pas n - Phl p 1 - …
All s - Aln g 1 - Ana o - Ara h 1 - Ara h 2 - Ara h 3 - Ara h 6 - Bet v 1 - Blo t 21 - Blo t 5 - Cyn d 1 - Der f 1 - Der f 2 - Der p 1 - Der p 2 - Der p 21 - Der p 5 - Der p 7 - Fag s 1 - Gal d 1 - Gal d 2 - Gal d 3 - Gal d_white - Gly d 2 - Lep d 2 - Lol p 1 - Mala s 6 - Ory c 3 - Phl p 1 - Phl p 5.0101 - Sin - Sin a 1 - Tri fo - Tyr p,1
Alt a 1 - Gad m 1,1
Ach d - Amb a 1 - Can f 4 - Can f 6 - Der f 2 - Der p 2 - Der p 21 - Der p 23 - Der p 5 - Der p 7 - Fel d 1 - Lep d 2 - Lol p 1 - Mala s 6 - Mus m 1 - Ory c 3 - Phl p 1 - Sol t,1
Aca s - Amb a - Amb a 1 - Blo t 10 - Cry j 1 - Der f 1 - Der f 2 - Der p 1 - Der p 10 - Der p 2 - Der p 23 - Fel d 1 - Gly d 2 - Lep d 2 - Mala s 5 - Tyr p - Tyr p 2,1
Alt a 1 - Amb a - Amb a 1 - Amb a 4 - Art v - Art v 1 - Asp f 3 - Can f 1 - Can f 6 - Cry j 1 - Cup a 1 - Cyn d - Cyn d 1 - Equ c 1 - Fel d 1 - Fel d 4 - Fel d 7 - Jug r 2 - Jug r_pollen - Lol p 1 - Mus m 1 - Phl p 1 - Phod s 1 - Phr c - Pla a 2 - Sec c_pollen,1
Ach d - Alt a 1 - Amb a - Amb a 1 - Bla g 9 - Blo t 5 - Cla h 8 - Cra c 6 - Cry j 1 - Cuc m 2 - Cup a 1 - Cyn d 1 - Der f 1 - Der f 2 - Der p 1 - Der p 2 - Der p 20 - Der p 21 - Der p 23 - Der p 5 - Der p 7 - Fel d 1 - Gly d 2 - Lep d 2 - Loc m - Ory c 3 - Pen m 2 - Phl p 12 - Phl p 2 - Tyr p 2,1
Amb a 4 - Bla g 4 - Bla g 5 - Bos d_meat - Can f_Fd1 - Cyn d 1 - Der p 5 - Equ c 1 - Equ c_meat - Fel d 1 - Gad m 2+3 - Gly m 5 - Lol p 1 - Mala s 6 - Mes a 1_RUO - Ole e 7_RUO - Phl p 1 - Pho d 2 - Pla a 2,1
Aca m - Act d 10 - Aln g 1 - Alt a 1 - Alt a 6 - Ama r - Amb a - Amb a 1 - Ana o - Ana o 3 - Api g 1 - Api g 6 - Ara h 1 - Ara h 2 - Ara h 3 - Ara h 8 - Arg r 1 - Asp f 6 - Bet v 1 - Bet v 2 - Bet v 6 - Can f 1 - Can f 2 - Can f 3 - Can f 4 - Can f 6 - Can f_Fd1 - Can f_male urine - Car i - Cav p 1 - Cic a - Clu h - Clu h 1 - Cor a 1.0103 - Cor a 1.0401 - Cor a 11 - Cor a 14 - Cor a_pollen - Cuc …
Aca m - Aln g 1 - Alt a 1 - Ama r - Amb a - Amb a 1 - Bet v 1 - Bet v 2 - Cor a 1.0103 - Cor a 1.0401 - Cor a_pollen - Cry j 1 - Cuc m 2 - Cyn d - Cyn d 1 - Fag s 1 - Fel d 1 - Fra a 1+3 - Gal d 4 - Hev b 8 - Jug r_pollen - Lol p 1 - Mal d 1 - Mala s 6 - Mer a 1 - Pas n - Phl p 1 - Phl p 12 - Phl p 2 - Pho d 2 - Pol d - Pol d 5 - Pyr c - Sal k - Sec c_pollen - Ses i 1,1
Aln g 1 - Amb a - Amb a 4 - Api g 1 - Ara h 8 - Art v - Art v 1 - Bet v 1 - Bet v 2 - Bos d 4 - Bos d 8 - Bos d_milk - Cam d - Can f 1 - Can f 4 - Can f 6 - Cap h_epithelia - Cap h_milk - Cic a - Cla h 8 - Clu h 1 - Cor a 1.0103 - Cor a 1.0401 - Cor a 11 - Cor a_pollen - Cuc m 2 - Cyp c 1 - Dau c - Dau c 1 - Equ c 1 - Fag e - Fag e 2 - Fag s 1 - Fel d 1 - Fel d 4 - Fel d 7 - Fra a 1+3 - Gal d 4 -…
Alt a 1 - Amb a - Amb a 4 - Art v - Art v 1 - Cyn d - Cyn d 1 - Fel d 1 - Jug r_pollen - Lol p 1 - Mes a 1_RUO - Pas n - Phl p 1 - Phl p 5.0101 - Phl p 6 - Phr c - Pis v 4_RUO - Sec c_pollen,1
Alt a 1 - Amb a - Amb a 1 - Can f 3 - Can f 4 - Can f 6 - Can f_Fd1 - Cav p 1 - Cry j 1 - Der f 1 - Der p 23 - Equ c 1 - Equ c 3 - Fel d 1 - Fel d 2 - Fel d 4 - Gal d 3 - Mes a 1_RUO - Mus m 1 - Ory c 1 - Ory c 3 - Ory_meat - Ovi a_meat - Rat n - Sal s 1 - Sus d 1 - Sus d_epithelia,1
Alt a 1 - Ama r - Amb a - Amb a 1 - Amb a 4 - Art v - Art v 1 - Che a 1 - Cry j 1 - Der p 1 - Der p 21 - Der p 5 - Raj c - Sal k 1,1
Aca s - Ach d - All s - Amb a - Amb a 1 - Ani s 3 - Ara h 1 - Ara h 2 - Ara h 3 - Ara h 6 - Asp f 4 - Blo t 10 - Blo t 5 - Can f_Fd1 - Chi spp. - Cic a - Clu h 1 - Cyp c 1 - Der p 10 - Der p 5 - Fel d 1 - Fel d 2 - Gad m 1 - Gal d 1 - Gal d 2 - Gal d 3 - Gal d 4 - Gal d 5 - Gal d_white - Gal d_yolk - Hom g - Len c - Lep d 2 - Lit s - Loc m - Lol spp. - Lup a - Mal d 3 - Mes a 1_RUO - Mus m 1 - My…
Ach d - Ani s 3 - Blo t 10 - Chi spp. - Cuc p - Der f 1 - Der p 1 - Der p 10 - Lit s - Loc m - Lol spp. - Mala s 5 - Pen m 1 - Per a 7 - Pha v - Rud spp. - Ten m,1
Act d 1 - Aln g 1 - Amb a 4 - Api g 1 - Ara h 8 - Art v - Asp f 6 - Bet v 1 - Bla g 2 - Bla g 4 - Car p - Che a 1 - Clu h - Clu h 1 - Cor a 1.0103 - Cor a 1.0401 - Cor a_pollen - Cyn d - Cyn d 1 - Cyp c 1 - Fag s 1 - Fic b - Fic c - Fra a 1+3 - Gad m - Gad m 1 - Gal d 1 - Gal d 2 - Gal d_white - Gly m 4 - Hev b 11 - Lol p 1 - Mal d 1 - Mala s 11 - Par j 2 - Pas n - Phl p 1 - Phod s 1 - Pru p 3 - …
Act d 10 - Alt a 1 - Can f_Fd1 - Cap a - Che q - Cyn d - Cyn d 1 - Equ c 1 - Fel d 1 - Lol p 1 - Mus m 1 - Ory c 3 - Par j 2 - Pas n - Pha v - Phl p 1 - Phr c - Pop n - Rat n - Sec c_flour,1
Aca m - Ach d - Act d 10 - Act d 2 - Ail a - All s - Aln g 1 - Alt a 1 - Alt a 6 - Ama r - Amb a - Amb a 1 - Api g 1 - Api g 2 - Ara h 1 - Ara h 8 - Ara h 9 - Art v - Art v 3 - Asp f 3 - Ave s - Bet v 1 - Bla g 4 - Bro pa - Can f 1 - Can f 2 - Can f 6 - Can f_male urine - Can s - Can s 3 - Cap a - Car c - Car i - Che q - Cla h 8 - Cor a 1.0103 - Cor a 1.0401 - Cor a 11 - Cor a 8 - Cor a_pollen - …
Act d 2 - Aln g 1 - Alt a 1 - Alt a 6 - Ana o - Ana o 2 - Ana o 3 - Api g 1 - Ara h 1 - Ara h 2 - Ara h 3 - Ara h 6 - Ara h 8 - Arg r 1 - Ave s - Ber e - Bet v 1 - Can f 2 - Can f_Fd1 - Car c - Car i - Che q - Cic a - Cor a 1.0103 - Cor a 1.0401 - Cor a 11 - Cor a 14 - Cor a 9 - Cor a_pollen - Cuc p - Cyn d - Cyn d 1 - Dau c - Dau c 1 - Fag e - Fag s 1 - Fel d 1 - Fra a 1+3 - Gal d 3 - Gal d 5 - …
Aca s - Alt a 1 - Can f 1 - Can f 6 - Clu h - Clu h 1 - Cyp c 1 - Der f 1 - Der f 2 - Der p 1 - Der p 2 - Der p 23 - Equ c 1 - Fel d 1 - Fel d 4 - Fel d 7 - Gad m - Gad m 1 - Gly d 2 - Lep d 2 - Mus m 1 - Phl p 2 - Raj c Parvalbumin - Sal s - Sal s 1 - Sco s 1 - Thu a 1 - Tyr p - Xip g 1,1
Act d 2 - Aln g 1 - Alt a 1 - Amb a - Amb a 1 - Api g 1 - Ara h 1 - Ara h 8 - Bet v 1 - Can f 4 - Can f_male urine - Cor a 1.0103 - Cor a 1.0401 - Cor a_pollen - Dau c - Dau c 1 - Fag s 1 - Fel d 1 - Fel d 4 - Fra a 1+3 - Fra e - Gad m 1 - Gly m 4 - Len c - Mal d 1 - Phl p 2 - Pyr c - Ves v 5,1
Aln g 1 - Alt a 1 - Ana o - Ana o 3 - Art v - Art v 1 - Bet v 1 - Bla g 4 - Can f_Fd1 - Car i - Cor a 1.0103 - Cor a 1.0401 - Cor a 14 - Cor a_pollen - Cup s - Fag s 1 - Fel d 1 - Fel d 4 - Fra a 1+3 - Gal d 4 - Gly m 4 - Hel a - Jug r 1 - Jug r 2 - Mal d 1 - Phl p 2 - Pis v 1 - Pis v 3 - Sec c_flour,1
Alt a 1 - Asp f 3 - Fel d 1 - Phl p 2 - Ves v - Ves v 5,1
Aca m - Aln g 1 - Alt a 1 - Ama r - Amb a - Amb a 1 - Api g 1 - Ara h 8 - Art v - Bet v 1 - Bet v 2 - Can f 1 - Can f_Fd1 - Can f_male urine - Cor a 1.0103 - Cor a 1.0401 - Cor a_pollen - Cry j 1 - Cuc m 2 - Cuc p - Cyn d - Cyn d 1 - Dau c - Dau c 1 - Der f 1 - Der f 2 - Der p 1 - Der p 2 - Der p 21 - Dol spp - Fag s 1 - Fel d 1 - Fel d 7 - Fra a 1+3 - Gly m 4 - Hev b 8 - Jug r_pollen - Lep d 2 -…
Aln g 1 - Amb a - Amb a 1 - Api g 1 - Bet v 1 - Can f 1 - Can f 2 - Can f 3 - Can f 4 - Can f 6 - Can f_male urine - Cap h_epithelia - Clu h 1 - Cor a 1.0103 - Cor a 1.0401 - Cor a_pollen - Dau c - Dau c 1 - Equ c 1 - Equ c 3 - Equ c_meat - Fag s 1 - Fel d 1 - Fel d 2 - Fel d 4 - Fel d 7 - Gal d_white - Gly m 4 - Mal d 1 - Mala s 11 - Ory_meat - Ovi a_meat - Phl p 5.0101 - Rat n - Sco s 1 - Sec c…
Alt a 1 - Cyn d 1 - Der f 1 - Der f 2 - Der p 1 - Der p 2 - Der p 23 - Gly d 2 - Lep d 2 - Lol p 1 - Phl p 1,1
Aln g 1 - Alt a 1 - Art v 1 - Bet v 1 - Cor a 1.0103 - Der f 1 - Der f 2 - Der p 1 - Der p 2 - Der p 23 - Fag s 1 - Fra a 1+3 - Gly d 2 - Lep d 2 - Mala s 5 - Tyr p,1
Alt a 1 - Cla h 8 - Ost e - Phl p 2 - Pis s,1
Alt a 1 - Der f 1 - Der f 2 - Der p 1 - Der p 2 - Der p 23 - Gly d 2 - Hel a - Lep d 2 - Mala s 6 - Phl p 2 - Ves v - Ves v 5,1
Aca s - Bla g 9 - Cyn d - Cyn d 1 - Der f 1 - Der f 2 - Der p 1 - Der p 2 - Der p 20 - Der p 21 - Der p 23 - Der p 5 - Fel d 1 - Gly d 2 - Gly m 6 - Mala s 5 - Pen m 2,1
Bla g 4 - Der p 7 - Mala s 11 - Par j 2 - Sac c,1
Alt a 6 - Amb a 1 - Cla h 8 - Der p 23 - Fel d 1 - Fel d 4 - Gad m 1,1
Alt a 1 - Amb a 1 - Asp f 3 - Lol p 1 - Phl p 1 - Phl p 2 - Ves v 5,1
Aca s - Ach d - Ani s 3 - Ara h 6 - Bla g 9 - Blo t 10 - Chi spp. - Cla h 8 - Der f 1 - Der f 2 - Der p 1 - Der p 10 - Der p 2 - Der p 20 - Der p 23 - Der p 7 - Hom g - Lep d 2 - Lit s - Loc m - Lol spp. - Ost e - Pan b - Pen m 1 - Pen m 2 - Per a - Per a 7 - Sal k - Ten m,1
Aca m - Alt a 1 - Ama r - Amb a 1 - Art v - Art v 1 - Asp f 3 - Che a - Che q - Cic a - Cla h 8 - Fra e - Jug r_pollen - Mala s 6 - Ory s - Ost e - Pan m - Pers a - Phl p 2 - Pis s - Pla l - Pop n - Pyr c - Sal k - Ulm c - Ves v 5,1
Ach d - Act d 1 - Aln g 1 - Api g 1 - Api m - Api m 1 - Api m 10 - Asp f 3 - Bet v 1 - Can f_Fd1 - Can f_male urine - Cor a 1.0103 - Cor a 1.0401 - Cor a_pollen - Cry j 1 - Cyn d - Cyn d 1 - Dau c 1 - Der f 1 - Der f 2 - Der p 1 - Der p 2 - Der p 21 - Der p 23 - Der p 5 - Der p 7 - Fag e - Fag s 1 - Fel d 1 - Fra a 1+3 - Lol p 1 - Lol spp. - Mal d 1 - Mes a 1_RUO - Pec spp. - Phl p 1 - Ten m - Va…
Asp f 4 - Can f 4 - Der p 20 - Hom g - Phl p 1 - Pis v 4_RUO - Sco s - Ten m,1
Aca s - Ach d - Ana o - Ani s 3 - Api g 6 - Ara h 1 - Ara h 2 - Ara h 3 - Ara h 6 - Ara h 9 - Arg r 1 - Asp f 4 - Ave s - Ber e - Blo t 10 - Can f 2 - Can f 6 - Chi spp. - Cic a - Clu h - Clu h 1 - Cor a 9 - Cuc p - Cyn d 1 - Cyp c 1 - Der f 1 - Der f 2 - Der p 10 - Der p 2 - Der p 23 - Der p 5 - Equ c 1 - Fag e - Fel d 1 - Gad m - Gad m 1 - Gal d 2 - Gal d 3 - Gal d 4 - Gal d 5 - Gal d_white - G…
Alt a 1 - Amb a - Amb a 4 - Api g 6 - Art v - Art v 1 - Blo t 21 - Blo t 5 - Can f 1 - Can f 6 - Can f_Fd1 - Clu h 1 - Cyn d - Cyn d 1 - Cyp c 1 - Der f 1 - Der f 2 - Der p 1 - Der p 2 - Der p 21 - Der p 23 - Der p 5 - Equ c 1 - Fel d 1 - Fel d 4 - Fel d 7 - Gad m - Gad m 1 - Jug r_pollen - Lol p 1 - Mus m 1 - Phl p 1 - Phl p 2 - Phl p 5.0101 - Phl p 6 - Rat n - Sal s - Sal s 1 - Sco s 1 - Sec c_…
Act d 2 - Ana o 3 - Bla g 4 - Cla h 8 - Der p 23 - Gad m 1 - Gal d 4 - Mer a 1 - Ory c 2 - Pap s 2S Albumin,1
Aca s - Aln g 1 - Alt a 1 - Api g 1 - Ara h 8 - Bet v 1 - Can f 1 - Cor a 1.0103 - Cor a 1.0401 - Cor a 14 - Cor a_pollen - Dau c - Dau c 1 - Der f 1 - Der f 2 - Der p 1 - Der p 2 - Der p 23 - Fag s 1 - Fel d 1 - Fel d 7 - Fra a 1+3 - Mal d 1 - Phl p 5.0101 - Phl p 6 - Pru p 3 - Sec c_pollen,1
Bos d_meat - Equ c_meat - Mala s 6,1
Act d 2 - Alt a 1 - Art v 1 - Der p 23 - Par j 2 - Phl p 2 - Phl p 5.0101,1
Alt a 1 - Bet v 1 - Bos d 2 - Can f_Fd1 - Che q - Clu h - Clu h 1 - Cor a 1.0103 - Cyn d - Cyn d 1 - Cyp c 1 - Der f 1 - Der f 2 - Der p 1 - Der p 2 - Der p 23 - Der p 5 - Der p 7 - Equ c 1 - Fel d 1 - Gad m - Gad m 1 - Gly d 2 - Lol p 1 - Mala s 6 - Mus m 1 - Ory c 1 - Pas n - Pha v - Phl p 1 - Phl p 2 - Phl p 5.0101 - Phl p 6 - Pla l - Pla l 1 - Raj c Parvalbumin - Sal s - Sal s 1 - Sco s 1 - S…
Aln g 1 - Alt a 1 - Api g 1 - Ara h 8 - Bet v 1 - Bet v 2 - Cor a 1.0103 - Cor a 1.0401 - Cor a_pollen - Cuc m 2 - Cyn d - Cyn d 1 - Dau c - Dau c 1 - Fag s 1 - Fel d 1 - Fra a 1+3 - Gly m 4 - Hev b 8 - Jug r_pollen - Lol p 1 - Mal d 1 - Mer a 1 - Mus m 1 - Ory c 3 - Pha v - Phl p 1 - Phl p 12 - Phl p 2 - Pho d 2 - Pop n,1
Alt a 1 - Amb a 1 - Art v 1 - Can f 4 - Fel d 1 - Jug r_pollen,1
Alt a 1 - Amb a - Amb a 1 - Bet v 2 - Can f_Fd1 - Car i - Cor a 14 - Cuc m 2 - Der f 1 - Der f 2 - Der p 1 - Der p 2 - Fel d 1 - Fel d 4 - Hev b 8 - Jug r 1 - Jug r 2 - Jug r 6 - Phl p 12 - Pho d 2 - Pis v 1,1
Ach d - Alt a 1 - Cyn d - Cyn d 1 - Der f 1 - Der f 2 - Der p 1 - Der p 2 - Jug r_pollen - Loc m - Lol p 1 - Phl p 1 - Phl p 2 - Ten m - Ves v - Ves v 5,1
Alt a 1 - Api m - Api m 1 - Api m 10 - Fel d 1 - Pha v - Phl p 2 - Sal k,1
Alt a 1 - Amb a - Amb a 1 - Bet v 2 - Cry j 1 - Cuc m 2 - Der f 2 - Der p 2 - Lep d 2 - Phl p 12 - Pho d 2 - Thu a - Vac m - Ves v,1
Aca s - Act d 2 - Aln g 4 - Alt a 1 - Art v - Art v 3 - Bla g 9 - Car i - Clu h - Clu h 1 - Cyp c 1 - Der f 1 - Der f 2 - Der p 1 - Der p 2 - Der p 20 - Der p 23 - Equ c_milk - Fel d 1 - Fra a 1+3 - Gad m - Gad m 1 - Gad m 2+3 - Gly d 2 - Jug r 1 - Jug r 2 - Jug r 3 - Lep d 2 - Mal d 3 - Pen m 2 - Phl p 2 - Pla a 3 - Pol d - Pol d 5 - Pru p 3 - Sal s - Sal s 1 - Sco s 1 - Thu a 1 - Tyr p - Urt d …
Aca m - Act d 1 - Act d 10 - Act d 2 - Ail a - All s - Ana o - Ana o 3 - Api g 2 - Api g 6 - Ara h 1 - Ara h 3 - Art v 3 - Ave s - Ber e - Bet v 6 - Bos d 4 - Bos d 5 - Bos d 6 - Bos d 8 - Bos d_milk - Cam d - Can f 3 - Can s - Can s 3 - Cap a - Cap h_epithelia - Cap h_milk - Car i - Car p - Che q - Cic a - Cor a 11 - Cor a 14 - Cor a 8 - Cor a 9 - Cor a_pollen - Cry j 1 - Cuc p - Cup a 1 - Cyn d…
Aca s - Bos d 6 - Can f 3 - Can f 6 - Can f_Fd1 - Cap h_epithelia - Cav p 1 - Cry j 1 - Der f 1 - Der f 2 - Der p 1 - Der p 2 - Der p 23 - Equ c 1 - Equ c 3 - Equ c_meat - Fel d 1 - Fel d 2 - Fel d 4 - Gly d 2 - Lol spp. - Mala s 11 - Mus m 1 - Rat n - Sus d 1 - Sus d_epithelia - Tyr p,1
Aln g 1 - Alt a 1 - Art v 1 - Bet v 1 - Cor a 1.0103 - Fra a 1+3,1
Alt a 1 - Blo t 21 - Can s 3 - Cor a 8 - Der f 1 - Der f 2 - Der p 1 - Der p 2 - Der p 23 - Der p 5 - Der p 7 - Fra a 1+3 - Gly d 2 - Tyr p 2 - Vac m,1
Aca s - Api m 1 - Asp f 6 - Der f 2 - Der p 2 - Der p 23 - Mala s 11 - Tyr p,1
Alt a 1 - Cyn d - Cyn d 1 - Der f 1 - Der f 2 - Der p 1 - Der p 2 - Der p 23 - Lol p 1 - Phl p 1 - Phl p 2 - Phl p 5.0101,1
Alt a 1 - Amb a 4 - Api m - Api m 10 - Vac m,1
Ach d - Act d 1 - Ani s 3 - Bla g 9 - Blo t 10 - Bos d 2 - Chi spp. - Der f 1 - Der f 2 - Der p 1 - Der p 10 - Der p 2 - Der p 20 - Der p 21 - Der p 23 - Der p 5 - Der p 7 - Gal d_yolk - Gly d 2 - Loc m - Mac i 2S Albumin - Mac inte - Mala s 6 - Pen m 1 - Per a 7 - Ten m - Tyr p 2,1
Alt a 1 - Cyn d - Cyn d 1 - Lol p 1 - Pas n - Phl p 1 - Phl p 2 - Phl p 5.0101 - Phl p 6 - Pla l - Pla l 1 - Sec c_pollen,1
Alt a 1 - Ara h 1 - Ara h 2 - Ara h 6 - Can f 1 - Can f 2 - Der f 1 - Der f 2 - Der p 1 - Der p 2 - Fel d 7 - Lep d 2,1
Amb a - Amb a 1 - Amb a 4 - Art v - Art v 1 - Bet v 1 - Cry j 1 - Cyn d - Cyn d 1 - Fag s 1 - Gal d 1 - Gal d 2 - Gal d_white - Lol p 1 - Pas n - Phl p 1 - Phl p 2 - Sac c,1
Act d 2 - Alt a 1 - Amb a - Amb a 1 - Amb a 4 - Api m 10 - Asp f 3 - Cla h 8 - Cry j 1 - Cyn d - Cyn d 1 - Der f 1 - Der f 2 - Der p 1 - Der p 2 - Gly d 2 - Lep d 2 - Lol p 1 - Pas n - Phl p 1 - Phl p 2 - Sol spp. - Ves v 5,1
Amb a - Amb a 4 - Art v - Art v 1 - Cyn d - Cyn d 1 - Der f 1 - Der f 2 - Der p 1 - Der p 2 - Der p 23 - Der p 5 - Der p 7 - Fel d 1 - Gly d 2 - Gly m 6 - Lep d 2 - Mala s 5 - Tyr p 2,1
Ani s 1 - Ani s 3 - Blo t 10 - Can s 3 - Cla h 8 - Der p 10 - Hev b 1 - Lol spp. - Myt e - Ost e - Pen m 1 - Per a 7 - Pis v 1,1
Ama r - Amb a - Amb a 1 - Amb a 4 - Art v - Art v 1 - Asp f 3 - Bet v 2 - Can f 4 - Can f 6 - Can f_male urine - Cav p 1 - Cuc m 2 - Cyn d - Cyn d 1 - Fel d 1 - Gal d_meat - Hev b 11 - Hev b 8 - Hom g - Jug r_pollen - Lol p 1 - Mer a 1 - Mus m 1 - Ory c 1 - Ory_meat - Ost e - Pas n - Pen m 2 - Per a - Phl p 1 - Phl p 12 - Phl p 2 - Phl p 5.0101 - Phl p 6 - Pho d 2 - Phr c - Pla l - Pop n - Pyr c …
Aca m - Aca s - Act d 10 - All s - Aln g 1 - Alt a 1 - Api g 2 - Ara h 9 - Art v - Art v 3 - Bet v 1 - Bet v 2 - Can s - Can s 3 - Cor a 1.0103 - Cor a 1.0401 - Cor a 8 - Cor a_pollen - Cry j 1 - Cuc m 2 - Cuc p - Cup a 1 - Der f 1 - Der f 2 - Der p 1 - Der p 2 - Fag s 1 - Fel d 1 - Fra a 1+3 - Gly m 4 - Hor v - Jug r 3 - Jug r_pollen - Lep d 2 - Mal d 3 - Pan m - Phl p 12 - Phl p 2 - Phl p 5.010…
Aca s - Ach d - Alt a 1 - Ani s 3 - Ara h 6 - Arg r 1 - Blo t 10 - Can f 6 - Chi spp. - Der f 1 - Der p 1 - Der p 10 - Der p 23 - Fel d 2 - Gal d 1 - Hom g - Lit s - Loc m - Lol spp. - Myt e - Ost e - Pan b - Pen m 1 - Per a - Per a 7 - Rud spp. - Ses i - Sol spp. - Ten m - Tyr p - Urt d,1
Aca m - Act d 10 - Act d 2 - Ail a - All c - All s - Aln g 1 - Aln g 4 - Ama r - Amb a - Ana o - Ana o 2 - Ana o 3 - Api g 1 - Api g 2 - Api g 6 - Api m - Api m 10 - Ara h 1 - Ara h 2 - Ara h 3 - Ara h 6 - Ara h 8 - Ara h 9 - Arg r 1 - Art v - Asp f 1 - Ave s - Ber e - Ber e 1 - Bet v 1 - Bla g 1 - Bla g 4 - Bla g 5 - Blo t 10 - Blo t 21 - Blo t 5 - Bos d 4 - Bos d 5 - Bos d 6 - Bos d 8 - Bos d_m…
Aca s - Alt a 1 - Cra c 6 - Cyn d 1 - Der f 1 - Der f 2 - Der p 1 - Der p 11 - Der p 2 - Der p 21 - Der p 23 - Der p 5 - Der p 7 - Gly d 2 - Mus m 1 - Tyr p,1
Aca m - All s - Ama r - Ara h 9 - Art v 3 - Bet v 2 - Bro pa - Car p - Cic a - Cor a 8 - Cry j 1 - Cuc m 2 - Cup a 1 - Cup s - Dau c - Fag s 1 - Fra a 1+3 - Hev b 8 - Hom s LF - Jug r 2 - Jug r_pollen - Jun a - Mal d 1 - Mal d 3 - Mala s 6 - Mer a 1 - Ole e 1 - Pan m - Pap s - Pas n - Pers a - Pet c - Pha v - Phl p 12 - Pho d 2 - Phr c - Pis s - Pla a 2 - Pla a 3 - Pla l - Pop n - Pru av - Pru p …
Act d 2 - Alt a 1 - Amb a - Amb a 1 - Bet v 2 - Can f 1 - Can f 2 - Can f 6 - Can f_male urine - Cry j 1 - Cuc m 2 - Cyn d - Cyn d 1 - Equ c 1 - Fel d 1 - Fel d 4 - Fel d 7 - Gal d 4 - Hev b 8 - Lol p 1 - Mer a 1 - Mus m 1 - Myt e - Ost e - Pas n - Phl p 1 - Phl p 12 - Pho d 2 - Ves v 1 - Ves v 5,1
Aca s - Bla g 4 - Can f_male urine - Cla h - Cry j 1 - Der f 1 - Der f 2 - Der p 1 - Der p 2 - Der p 23 - Der p 7 - Fel d 1 - Gly d 2 - Lep d 2 - Mala s 5 - Par j 2 - Pen ch - Phl p 2 - Pru p 3 - Sac c - Sol spp. - Tyr p,1
Aca m - Aca s - Ach d - Act d 1 - Act d 10 - Ail a - All s - Api g 2 - Ara h 1 - Ara h 9 - Art v - Art v 3 - Blo t 10 - Bos d 5 - Bos d 6 - Bos d 8 - Bos d_meat - Bos d_milk - Can f 1 - Can f 3 - Can f 6 - Can s - Can s 3 - Cap a - Cap h_epithelia - Cic a - Clu h - Clu h 1 - Cor a 8 - Cra c 6 - Cyn d - Cyn d 1 - Cyp c 1 - Der f 1 - Der f 2 - Der p 1 - Der p 2 - Der p 21 - Der p 23 - Der p 5 - Der…
Alt a 1 - Amb a - Amb a 1 - Art v - Art v 1 - Art v 3 - Asp f 3 - Can f_male urine - Cla h - Cla h 8 - Der p 1 - Lol p 1 - Par j 2 - Phl p 1 - Phl p 2,1
Act d 2 - Alt a 1 - Cyn d - Cyn d 1 - Der f 2 - Der p 2 - Fel d 1 - Lol p 1 - Phl p 1,1
Act d 2 - Mala s 6 - Ves v,1
Ach d - Api m - Api m 1 - Asp f 1 - Bos d 2 - Chi spp. - Dol spp - Loc m - Pha v - Pol d - Pop n - Ses i - Ten m - Vac m - Ves v,1
Alt a 1 - Amb a - Amb a 1 - Blo t 10 - Bos d 5 - Der p 1 - Der p 10 - Fag s 1 - Fel d 2 - Gly m 6 - Hev b 1 - Lit s - Pen m 1 - Per a 7 - Pru p 3 - Thu a - Tri a 14 - Vac m - Ves v - Ves v 1,1
Act d 2 - Alt a 1 - Alt a 6 - Amb a - Amb a 1 - Art v - Asp f 3 - Cic a - Cla h - Cla h 8 - Cyn d - Cyn d 1 - Fel d 1 - Jug r_pollen - Lol p 1 - Pen m 2 - Phl p 1 - Phl p 2 - Sal k - Sin - Sin a 1 - Vac m,1
Cla h 8 - Lol spp.,1
Aca m - Ach d - Amb a - Amb a 1 - Can f_Fd1 - Cry j 1 - Der p 20 - Fel d 1 - Loc m - Lol p 1 - Mala s 5 - Phl p 1 - Sin - Sin a 1 - Ten m - Tyr p,1
Aca m - Ail a - Ama r - Amb a - Amb a 1 - Art v - Asp f 6 - Bet v 2 - Bla g 4 - Cry j 1 - Cuc m 2 - Cup a 1 - Cyn d - Der f 1 - Der p 1 - Fel d 1 - Gal d_meat - Gly m 8 - Hev b 8 - Jug r_pollen - Mala s 11 - Mer a 1 - Ory_meat - Pas n - Pers a - Phl p 12 - Pho d 2 - Phr c - Pla l - Sal k - Sec c_pollen,1
Act d 2 - Amb a - Amb a 1 - Bet v 2 - Cry j 1 - Cuc m 2 - Cyn d - Cyn d 1 - Der f 1 - Der f 2 - Der p 1 - Der p 2 - Der p 21 - Der p 23 - Fel d 1 - Lol p 1 - Mala s 6 - Phl p 1 - Pho d 2 - Tri a 19,1
Act d 2 - Alt a 1 - Art v - Asp f 3 - Bla g 4 - Can f 1 - Can f 6 - Can f_male urine - Cry j 1 - Cyn d - Cyn d 1 - Der p 7 - Equ c 1 - Fel d 1 - Fel d 4 - Fel d 7 - Lol p 1 - Mala s 11 - Mes a 1_RUO - Par j 2 - Pas n - Phl p 1 - Phl p 2 - Pla a 2 - Pol d - Pol d 5 - Pop n - Pru p 3 - Sac c - Sal k - Sec c_pollen - Ves v - Ves v 1 - Ves v 5,1
Alt a 1 - Ama r - Amb a - Amb a 1 - Amb a 4 - Art v - Art v 1 - Bet v 2 - Can f 1 - Can f_Fd1 - Cry j 1 - Cuc m 2 - Cup a 1 - Der p 5 - Fel d 1 - Fel d 4 - Hev b 8 - Jug r_pollen - Lol p 1 - Mer a 1 - Phl p 1 - Phl p 12 - Pho d 2 - Pla l - Pla l 1 - Sal k - Sal k 1,1
Cla h 8 - Mala s 6,1
Alt a 1 - Amb a - Amb a 1 - Amb a 4 - Art v - Cry j 1 - Cuc m 2 - Equ c 1 - Fel d 1 - Fel d 4 - Mer a 1 - Phl p 1 - Phl p 12 - Pho d 2 - Raj c,1
Alt a 1 - Alt a 6 - Ama r - Amb a - Amb a 1 - Art v - Asp f 3 - Bet v 2 - Cla h 8 - Clu h 1 - Cry j 1 - Cuc m 2 - Cyn d - Cyn d 1 - Cyp c 1 - Der f 2 - Der p 2 - Fel d 1 - Gad m - Gad m 1 - Hev b 8 - Jug r_pollen - Lol p 1 - Mac inte - Mala s 6 - Mer a 1 - Pas n - Phl p 1 - Phl p 12 - Phl p 2 - Pho d 2 - Phr c - Pla l - Raj c - Sal s 1 - Sco s 1 - Thu a 1 - Xip g 1,1
Ail a - Alt a 1 - Amb a - Amb a 1 - Amb a 4 - Bet v 2 - Cry j 1 - Cuc m 2 - Cyn d - Cyn d 1 - Fel d 1 - Fra e - Fra e 1 - Hev b 8 - Jug r_pollen - Lol p 1 - Mer a 1 - Ole e 1 - Pas n - Phl p 1 - Phl p 12 - Phl p 2 - Phl p 5.0101 - Phl p 6 - Pho d 2 - Pim a - Sec c_pollen,1
Ach d - Alt a 1 - Amb a - Amb a 1 - Art v - Art v 1 - Asp f 3 - Bla g 9 - Cav p 1 - Cra c 6 - Cry j 1 - Cyn d - Cyn d 1 - Der p 20 - Der p 23 - Fel d 1 - Loc m - Lol p 1 - Pec spp. - Per a - Phl p 1 - Phl p 2 - Phr c - Sus d 1 - Ten m,1
Alt a 1 - Amb a 1 - Asp f 3 - Cyn d - Cyn d 1 - Der p 7 - Lol p 1 - Phl p 1 - Phl p 2,1
Ach d - Alt a 1 - Asp f 3 - Asp f 4 - Bla g 4 - Can f_Fd1 - Cyn d - Cyn d 1 - Fel d 1 - Fic c - Fra e - Fra e 1 - Gal d 1 - Gal d_white - Loc m - Lol p 1 - Lol spp. - Mal d 1 - Ole e 1 - Par j 2 - Pas n - Pec spp. - Pen m 4 - Phl p 1 - Phl p 2 - Phr c - Raj c - Sec c_pollen - Ten m,1
Alt a 1 - Amb a - Amb a 1 - Amb a 4 - Api m - Api m 1 - Api m 10 - Bet v 1 - Can f_male urine - Cyn d 1 - Lol p 1 - Pas n - Phl p 1 - Phl p 2 - Urt d,1
Alt a 1 - Amb a 1 - Bet v 1 - Sal k 1 - Vac m,1
Act d 2 - Amb a - Amb a 4 - Art v - Art v 1 - Mala s 6 - Sol spp.,1
Alt a 1 - Amb a - Amb a 1 - Asp f 3 - Fel d 1,1
Art v 1 - Mala s 6 - Pol d - Pol d 5 - Ves v - Ves v 5,1
Act d 1 - All s - Alt a 1 - Amb a - Amb a 1 - Bet v 6 - Bos d 4 - Bos d 8 - Bos d_milk - Cap h_epithelia - Cap h_milk - Cry j 1 - Fic c - Jug r_pollen - Ovi a_milk - Phl p 1 - Phl p 5.0101 - Sin a 1,1
Alt a 1 - Amb a - Amb a 1 - Art v - Bet v 2 - Cry j 1 - Cuc m 2 - Der f 2 - Der p 2 - Fel d 1 - Hev b 8 - Jug r_pollen - Mer a 1 - Ost e - Pers a - Phl p 12 - Pho d 2,1
Ach d - All c - All s - Aln g 1 - Aln g 4 - Alt a 1 - Alt a 6 - Api m 10 - Art v 1 - Bos d 4 - Bos d 5 - Bos d 6 - Phod s 1,1
Aln g 1 - Alt a 1 - Amb a - Amb a 1 - Amb a 4 - Bet v 1 - Bet v 2 - Cor a 1.0103 - Cry j 1 - Cuc m 2 - Cyn d - Cyn d 1 - Der p 23 - Gly m 4 - Hev b 8 - Lol p 1 - Mer a 1 - Pas n - Phl p 1 - Phl p 12 - Phl p 2 - Pho d 2,1
Ach d - Aln g 1 - Asp f 6 - Bet v 1 - Fag s 1 - Mala s 11 - Myt e - Ten m,1
Amb a 1 - Asp f 6 - Mala s 11 - Pla a 2 - Ten m - Urt d - Vac m,1
Act d 2 - Ana o - Api m 10 - Ara h 3 - Ber e - Bos d 2 - Bos d 4 - Bos d 5 - Bos d 6 - Bos d 8 - Bos d_milk - Can f 1 - Can f 4 - Can f 6 - Cap h_epithelia - Car i - Che q - Cic a - Cor a 11 - Cor a 9 - Cor a_pollen - Cuc p - Fag e - Fel d 7 - Gal d 2 - Gal d_white - Gly m 5 - Gly m 6 - Hel a - Hor v - Jug r 4 - Len c - Lup a - Mac inte - Mala s 6 - Ovi a_milk - Pap s - Pis s - Pis v 2 - Pru du -…
Act d 2 - Amb a - Amb a 1 - Bla g 5 - Gly m 5 - Mala s 6,1
Act d 2 - Mala s 6,1
Ach d - Alt a 1 - Asp f 3 - Cla h 8 - Cyn d - Cyn d 1 - Fel d 1 - Jug r_pollen - Lol p 1 - Pas n - Pen m 3 - Phl p 1 - Phl p 2 - Phl p 5.0101 - Phl p 6 - Pop n - Sec c_pollen - Ten m,1
Ail a - Alt a 1 - Amb a - Amb a 1 - Asp f 3 - Bla g 9 - Blo t 21 - Blo t 5 - Can f 1 - Can f 3 - Can f 4 - Can f 6 - Can f_Fd1 - Can f_male urine - Cry j 1 - Cup a 1 - Der f 1 - Der f 2 - Der p 1 - Der p 2 - Der p 21 - Der p 5 - Der p 7 - Equ c 1 - Fel d 1 - Fel d 2 - Fel d 4 - Fel d 7 - Fra e - Fra e 1 - Gly d 2 - Jug r_pollen - Lep d 2 - Ole e 1 - Ory c 3 - Phl p 2 - Pop n - Sal k - Sus d 1,1
Alt a 1 - Amb a - Amb a 1 - Amb a 4 - Can f_Fd1 - Fel d 1 - Ves v - Ves v 1 - Ves v 5,1
Act d 2 - Bla g 5 - Gly m 5 - Lol spp. - Mala s 6 - Myt e - Ost e - Tri a 19 - Ves v - Ves v 5,1
Ach d - Api m - Api m 1 - Api m 10 - Asp f 3 - Can s 3 - Cra c 6 - Gal d 3 - Gal d 4 - Gal d 5 - Gal d_meat - Gal d_white - Gal d_yolk - Loc m - Myt e - Pol d - Pol d 5 - Ten m - Tyr p - Ves v - Ves v 1 - Ves v 5,1
Act d 1 - Act d 2 - Ail a - Amb a - Amb a 1 - Amb a 4 - Ana o - Api m 1 - Ara h 1 - Ara h 2 - Ave s - Ber e - Bla g 1 - Bla g 4 - Bla g 9 - Bos d 4 - Bos d_milk - Bro pa - Cam d - Can f 2 - Can s 3 - Cap h_epithelia - Cap h_milk - Che q - Cic a - Cor a 9 - Cor a_pollen - Cry j 1 - Cup a 1 - Cup s - Cyp c 1 - Dau c - Dau c 1 - Der f 1 - Der p 7 - Equ c 1 - Fag e 2 - Fag s 1 - Fel d 1 - Fel d 2 - F…
Amb a - Amb a 1 - Cry j 1 - Fel d 1 - Mala s 5 - Myt e - Pen m 3,1
Alt a 1 - Ama r - Amb a - Amb a 1 - Amb a 4 - Art v - Art v 1 - Asp f 3 - Bet v 2 - Cuc m 2 - Cyn d - Hev b 8 - Jug r_pollen - Mer a 1 - Pas n - Phl p 12 - Phl p 2 - Pho d 2 - Phr c - Pla l - Pop n - Pyr c - Sec c_pollen - Ten m - Urt d - Vac m,1
Ach d - Alt a 1 - Amb a - Amb a 1 - Can f_Fd1 - Cry j 1 - Der f 2 - Der p 10 - Der p 2 - Der p 21 - Der p 5 - Fel d 1 - Mala s 6 - Phl p 2 - Pis s - Sal k,1
Amb a - Amb a 1 - Cla h 8 - Cry j 1 - Cup a 1 - Gad m 1 - Hev b 11 - Jug r_pollen - Mal d 1 - Ory_meat - Pol d - Pol d 5 - Ves v 5,1
Act d 1 - Act d 2 - Amb a 1 - Api m 1 - Ara h 1 - Cla h 8 - Der p 10 - Hev b 1 - Hev b 11 - Hev b 6.02 - Ory_meat - Pet c - Pol d - Ses i 1 - Thu a,1
Asp f 3 - Mala s 5 - Pha v,1
Alt a 1 - Bet v 1 - Cor a 1.0103 - Der f 1 - Der f 2 - Der p 1 - Der p 2 - Der p 23 - Der p 5 - Fag s 1 - Fra a 1+3 - Gly d 2,1
Der f 1 - Der f 2 - Der p 1 - Der p 2 - Mala s 6 - Tyr p - Ves v - Ves v 5,1
Aca s - Act d 1 - Cyn d - Cyn d 1 - Der f 1 - Der f 2 - Der p 1 - Der p 2 - Der p 23 - Der p 5 - Der p 7 - Gly d 2 - Gly m 6 - Lep d 2 - Mala s 5 - Tyr p,1
Aca s - Ach d - Asp f 6 - Blo t 21 - Blo t 5 - Bos d 4 - Bos d 5 - Bos d 8 - Clu h - Cor a 1.0401 - Cor a 12_RUO - Cor a 14 - Cra c 6 - Cry j 1 - Cuc m 2 - Cup s - Cyn d - Cyn d 1 - Cyp c 1 - Dau c - Der p 5 - Equ c 1 - Gad m - Hom g - Hor v - Jug r 1 - Ovi a_milk - Pec spp. - Pen m 1 - Phl p 7 - Raj c Parvalbumin - Ses i - Sus d 1 - Tri a aA_TI,1
Alt a 1 - Amb a - Amb a 4 - Art v - Art v 1 - Can f 1 - Can f 3 - Can f 6 - Can f_Fd1 - Cap h_epithelia - Der f 2 - Der p 2 - Der p 23 - Equ c 3 - Fel d 1 - Fel d 2 - Fel d 4 - Fel d 7 - Mala s 6 - Ory c 3 - Sus d 1 - Sus d_epithelia,1
Aca s - Act d 1 - Act d 10 - Alt a 1 - Api g 2 - Api g 6 - Ara h 1 - Ara h 9 - Art v - Art v 3 - Ave s - Blo t 21 - Blo t 5 - Can s - Can s 3 - Cap a - Car i - Cor a 11 - Cor a 8 - Cry j 1 - Cuc p - Cup a 1 - Cyn d - Cyn d 1 - Der f 1 - Der f 2 - Der p 1 - Der p 2 - Der p 20 - Der p 21 - Der p 23 - Der p 5 - Der p 7 - Dol spp - Equ c 1 - Fag e - Fra a 1+3 - Gly d 2 - Hev b 3 - Jug r 1 - Jug r 2 -…
Ach d - Act d 1 - Amb a - Amb a 1 - Bla g 4 - Can f 6 - Can f_Fd1 - Der p 23 - Equ c 1 - Fel d 1 - Fel d 4 - Hom g - Lol spp. - Mala s 11 - Par j 2 - Pec spp. - Pru p 3 - Rat n - Ten m,1
Alt a 1 - Amb a - Amb a 1 - Bet v 1 - Can f 1 - Cor a 1.0103 - Cor a 1.0401 - Cyn d - Cyn d 1 - Der f 1 - Der f 2 - Der p 1 - Der p 2 - Der p 21 - Fag s 1 - Fel d 1 - Lep d 2 - Lol p 1 - Pas n - Phl p 1 - Phl p 2 - Phl p 5.0101 - Phl p 6 - Sec c_pollen - Ves v 5,1
Aca s - Act d 1 - Api m 10 - Ara h 1 - Asp f 6 - Bet v 6 - Bla g 4 - Car i - Clu h - Clu h 1 - Cor a 1.0103 - Cor a 14 - Cup s - Cyp c 1 - Der f 1 - Der f 2 - Der p 1 - Der p 2 - Der p 23 - Fel d 4 - Gad m - Gad m 1 - Gal d 1 - Gal d 2 - Gal d 3 - Gal d_white - Gly d 2 - Gly m 8 - Hel a - Hev b 3 - Jug r 1 - Jug r 2 - Jug r 4 - Jug r 6 - Len c - Lep d 2 - Lol p 1 - Mala s 11 - Ost e - Pan b - Par…
Aca s - Alt a 1 - Blo t 21 - Blo t 5 - Can f 1 - Der f 1 - Der f 2 - Der p 1 - Der p 2 - Der p 21 - Der p 23 - Der p 5 - Der p 7 - Fel d 1 - Fel d 7 - Gly d 2 - Jug r 1 - Myt e - Tyr p - Tyr p 2,1
Api m - Api m 10 - Der f 2 - Der p 2 - Der p 5 - Mala s 6 - Ost e,1
Act d 2 - Alt a 1 - Ama r - Amb a - Amb a 1 - Bet v 1 - Can f_male urine - Cry j 1 - Fel d 1 - Pop n - Sal k - Sal k 1,1
Alt a 1 - Art v 3 - Ave s - Can f 1 - Can f 2 - Can f 3 - Can f 4 - Can f 6 - Can f_male urine - Car i - Cav p 1 - Cor a 11 - Cor a 14 - Cyn d - Cyn d 1 - Equ c 1 - Equ c 3 - Fag e - Fel d 1 - Fel d 2 - Fel d 4 - Fel d 7 - Gly d 2 - Hom s LF - Jug r 1 - Jug r 2 - Jug r 4 - Jug r 6 - Lol p 1 - Myt e - Ory c 3 - Pas n - Phl p 1 - Phod s 1 - Pla a 2 - Pla l - Pla l 1 - Sola l 6 - Sus d 1 - Ves v 5 -…
Ail a - Amb a - Amb a 1 - Amb a 4 - Api m - Api m 1 - Api m 10 - Ara h 9 - Art v - Art v 1 - Art v 3 - Bet v 2 - Can f 1 - Can f_Fd1 - Can s 3 - Cry j 1 - Cuc m 2 - Cup a 1 - Cyn d - Cyn d 1 - Der f 1 - Der p 1 - Der p 23 - Fel d 1 - Fra a 1+3 - Hev b 8 - Jug r 3 - Lol p 1 - Mal d 3 - Mala s 11 - Mer a 1 - Mes a 1_RUO - Phl p 1 - Phl p 12 - Pho d 2,1
Aca s - Ach d - Blo t 5 - Can f 1 - Can f 6 - Can f_Fd1 - Can f_male urine - Cra c 6 - Cyn d - Cyn d 1 - Der f 1 - Der f 2 - Der p 1 - Der p 2 - Der p 21 - Der p 23 - Der p 5 - Der p 7 - Equ c 1 - Fel d 1 - Fel d 4 - Fel d 7 - Gly d 2 - Gly m 8 - Lep d 2 - Loc m - Lol p 1 - Mala s 5 - Mus m 1 - Ory c 3 - Par j - Pas n - Pers a - Phl p 1 - Phod s 1 - Ten m - Tyr p,1
Alt a 1 - Amb a - Amb a 4 - Art v - Art v 1 - Bet v 2 - Cuc m 2 - Fel d 1 - Hev b 8 - Jug r_pollen - Lol p 1 - Mer a 1 - Phl p 1 - Phl p 12 - Phl p 5.0101 - Phl p 6 - Pho d 2 - Sec c_pollen,1
Aln g 1 - Alt a 1 - Api g 1 - Ara h 8 - Bet v 1 - Cor a 1.0103 - Cor a 1.0401 - Cor a_pollen - Cyn d 1 - Dau c 1 - Der f 1 - Der f 2 - Der p 2 - Fag s 1 - Fel d 1 - Fra a 1+3 - Gly m 4 - Jug r_pollen - Lol p 1 - Mal d 1 - Phl p 1,1
Alt a 1 - Cuc m 2 - Cyn d - Cyn d 1 - Der f 1 - Der p 1 - Der p 23 - Der p 5 - Der p 7 - Fel d 1 - Gly d 2 - Lep d 2 - Lol p 1 - Mer a 1 - Pap s - Pas n - Phl p 1 - Phl p 12 - Phl p 5.0101 - Phl p 6 - Pho d 2 - Sec c_pollen - Tyr p 2,1
Aca s - Act d 1 - Cup s - Der f 1 - Der f 2 - Der p 1 - Der p 2 - Der p 23 - Der p 7 - Dol spp - Gly d 2 - Hev b 6.02 - Jug r 1 - Lep d 2 - Mala s 6 - Phl p 2 - Sol spp. - Ten m - Tyr p - Tyr p 2 - Ves v 5,1
Alt a 1 - Blo t 21 - Cra c 6 - Cyn d - Cyn d 1 - Der f 1 - Der f 2 - Der p 1 - Der p 2 - Der p 21 - Der p 23 - Der p 5 - Fel d 1 - Gly d 2 - Lol p 1 - Phl p 1 - Phl p 2 - Phl p 5.0101 - Sec c_pollen,1
Aca s - Ach d - Ani s 3 - Api m - Api m 10 - Ara h 15 - Ara h 6 - Arg r 1 - Asp f 4 - Blo t 10 - Chi spp. - Cra c 6 - Der f 1 - Der f 2 - Der p 1 - Der p 10 - Der p 2 - Der p 23 - Der p 5 - Der p 7 - Gly d 2 - Hom g - Lep d 2 - Lit s - Loc m - Lol spp. - Myt e - Ost e - Pan b - Pen m 1 - Per a - Per a 7 - Rud spp. - Ten m - Tyr p - Tyr p 2 - Vac m,1
Ama r - Api m - Api m 1 - Api m 10 - Asp f 6 - Gad m - Lep d 2 - Mala s 11 - Mala s 6 - Sec c_pollen - Ves v - Ves v 5,1
Ani s 3 - Cla h 8 - Cyn d 1 - Der p 10 - Gad m 1 - Lol p 1 - Phl p 1 - Phl p 2,1
Ach d - Aln g 1 - Api m - Api m 1 - Asp f 3 - Bet v 1 - Cor a 1.0103 - Cor a 1.0401 - Cor a_pollen - Cyn d - Cyn d 1 - Der f 1 - Der f 2 - Der p 1 - Der p 2 - Der p 23 - Equ c 1 - Fag s 1 - Fel d 1 - Hom g - Lep d 2 - Loc m - Lol p 1 - Mal d 1 - Mel g - Mes a 1_RUO - Pas n - Phl p 1 - Phl p 2 - Phl p 5.0101 - Sec c_pollen - Sol spp. - Ten m,1
Alt a 1 - Amb a - Amb a 1 - Amb a 4 - Api m 10 - Asp f 3 - Bet v 1 - Bla g 4 - Bla g 9 - Cav p 1 - Cor a 1.0401 - Cry j 1 - Der p 20 - Fag s 1 - Fel d 1 - Fra a 1+3 - Pla l 1 - Pop n - Rud spp. - Ves v,1
Aln g 1 - Api m - Api m 10 - Asp f 6 - Bet v 1 - Cor a 1.0103 - Cor a 1.0401 - Cor a_pollen - Der f 1 - Der f 2 - Der p 1 - Der p 2 - Der p 23 - Fag s 1 - Fel d 1 - Fra a 1+3 - Gly d 2 - Lep d 2 - Mal d 1,1
Alt a 1 - Bet v 1 - Fag s 1 - Fra a 1+3,1
Ach d - Art v 1 - Cla h - Der f 1 - Der p 1 - Der p 23 - Der p 5 - Ost e - Ves v 5,1
Aca s - Ach d - Act d 5 - Ani s 3 - Ara h 6 - Arg r 1 - Ber e 1 - Bla g 9 - Blo t 10 - Blo t 21 - Can f 6 - Chi spp. - Cor a 12_RUO - Cra c 6 - Cyn d 1 - Der f 2 - Der p 10 - Der p 2 - Der p 20 - Der p 21 - Der p 23 - Der p 5 - Fel d 1 - Fel d 2 - Fel d 4 - Gal d 1 - Gal d_meat - Gly d 2 - Hom g - Lep d 2 - Lit s - Loc m - Lol spp. - Mal d 2 - Mala s 5 - Mes a 1_RUO - Mus m 1 - Myt e - Ost e - Pa…
Aca s - Cyn d - Cyn d 1 - Der f 1 - Der f 2 - Der p 1 - Der p 2 - Der p 23 - Der p 7 - Fel d 1 - Gly d 2 - Lep d 2 - Lol p 1 - Mala s 5 - Phl p 1 - Ses i - Ses i 1 - Tyr p - Tyr p 2,1
Aca s - Ach d - Ama r - Amb a - Amb a 1 - Bet v 2 - Blo t 5 - Can f_Fd1 - Can f_male urine - Car i - Cry j 1 - Cuc m 2 - Cup a 1 - Cup s - Cyn d - Cyn d 1 - Der f 2 - Der p 2 - Der p 21 - Der p 23 - Der p 5 - Fag e - Fel d 1 - Fra e - Fra e 1 - Gly d 2 - Hev b 8 - Hom g - Hom s LF - Jug r_pollen - Lep d 2 - Lol p 1 - Mala s 11 - Mala s 6 - Ole e 1 - Pas n - Phl p 1 - Phl p 12 - Phl p 2 - Phl p 5.…
Alt a 1 - Art v - Art v 1 - Bet v 2 - Cuc m 2 - Cyn d - Cyn d 1 - Hev b 8 - Jug r_pollen - Lol p 1 - Mer a 1 - Pas n - Phl p 1 - Phl p 12 - Phl p 5.0101 - Phl p 6 - Phl p 7 - Pho d 2 - Pla l - Sec c_pollen,1
Asp f 6 - Mala s 11 - Par j 2,1
Alt a 1 - Cla h 8 - Cyn d - Cyn d 1 - Der f 1 - Der f 2 - Der p 1 - Der p 2 - Der p 23 - Equ c 3 - Lep d 2 - Lol p 1 - Pas n - Phl p 1 - Phl p 2 - Sec c_pollen,1
Alt a 1 - Amb a 4 - Api m - Api m 1 - Api m 10 - Art v - Art v 1 - Blo t 21 - Blo t 5 - Cyn d 1 - Der f 1 - Der f 2 - Der p 1 - Der p 2 - Der p 21 - Der p 23 - Der p 5 - Der p 7 - Gly d 2 - Lep d 2 - Phl p 2 - Ten m - Ves v 5,1
Aln g 1 - Alt a 1 - Api g 1 - Ave s - Bet v 1 - Bos d 4 - Bos d 6 - Can f 1 - Can f 3 - Cap h_epithelia - Cap h_milk - Cor a 1.0103 - Cor a 1.0401 - Cor a_pollen - Cyn d - Cyn d 1 - Dau c - Dau c 1 - Der f 1 - Der f 2 - Der p 1 - Der p 2 - Fag s 1 - Fel d 1 - Fel d 2 - Fra a 1+3 - Gly m 4 - Gly m 6 - Lep d 2 - Lol p 1 - Mal d 1 - Ost e - Ovi a_milk - Phl p 1 - Pis s - Sus d 1,1
Ach d - Alt a 1 - Bla g 9 - Cyn d - Cyn d 1 - Der f 1 - Der f 2 - Der p 1 - Der p 2 - Der p 20 - Der p 21 - Der p 23 - Der p 5 - Der p 7 - Gly d 2 - Loc m - Lol p 1 - Pen m 2 - Per a - Phl p 1 - Phl p 2 - Sol spp. - Ten m - Tyr p,1
Alt a 1 - Blo t 5 - Der f 1 - Der f 2 - Der p 1 - Der p 2 - Der p 23 - Der p 5 - Fel d 1 - Gly d 2 - Lep d 2 - Ost e - Tyr p 2 - Ves v 5,1
Api m - Can f 1 - Can f_Fd1 - Cap a - Cyn d - Cyn d 1 - Der f 1 - Der f 2 - Der p 1 - Der p 2 - Der p 21 - Der p 23 - Der p 5 - Der p 7 - Fel d 1 - Gly d 2 - Lep d 2 - Mala s 5 - Mus a - Pen m 3 - Pha v - Pop n - Sec c_flour - Tyr p - Tyr p 2 - Ulm c,1
Aln g 1 - Alt a 1 - Amb a - Amb a 1 - Asp f 3 - Bet v 1 - Can f 1 - Cor a 1.0103 - Cor a 1.0401 - Cor a_pollen - Cyn d - Cyn d 1 - Der f 1 - Der f 2 - Der p 1 - Der p 2 - Der p 23 - Der p 5 - Der p 7 - Fag s 1 - Fel d 1 - Fel d 2 - Fra a 1+3 - Gly d 2 - Lep d 2 - Mal d 1 - Phl p 5.0101 - Phl p 6 - Sec c_pollen - Tyr p 2 - Vac m,1
Aca s - Ach d - Ani s 3 - Arg r 1 - Blo t 10 - Chi spp. - Cyn d - Cyn d 1 - Der f 1 - Der f 2 - Der p 1 - Der p 10 - Der p 2 - Der p 23 - Der p 5 - Der p 7 - Fel d 1 - Fel d 2 - Gly d 2 - Gly m 6 - Hom g - Lep d 2 - Lit s - Loc m - Lol p 1 - Lol spp. - Mala s 5 - Myt e - Ory c 3 - Ost e - Pan b - Pec spp. - Pen m 1 - Per a - Per a 7 - Phl p 1 - Rud spp. - Sol spp. - Ten m - Tyr p - Tyr p 2,1
Aca s - Ach d - Act d 1 - Aln g 1 - Alt a 1 - Api g 1 - Ara h 8 - Bet v 1 - Bet v 2 - Blo t 21 - Blo t 5 - Cor a 1.0103 - Cor a 1.0401 - Cor a_pollen - Cra c 6 - Cry j 1 - Cuc m 2 - Cyn d - Cyn d 1 - Dau c - Dau c 1 - Der f 1 - Der f 2 - Der p 1 - Der p 2 - Der p 21 - Der p 23 - Der p 5 - Der p 7 - Dol spp - Equ c 3 - Fag s 1 - Fra a 1+3 - Gly d 2 - Gly m 4 - Gly m 6 - Hev b 3 - Hev b 8 - Jug r_p…
Aca s - Ach d - Amb a 1 - Ani s 3 - Ara h 15 - Ara h 6 - Arg r 1 - Asp f 3 - Asp f 4 - Blo t 10 - Blo t 21 - Bos d 4 - Chi spp. - Cic a - Der f 1 - Der f 2 - Der p 1 - Der p 10 - Der p 2 - Der p 20 - Der p 21 - Der p 23 - Der p 5 - Der p 7 - Equ c 3 - Fel d 1 - Gal d 1 - Gly d 2 - Gly m 4 - Hel a - Hom g - Hor v - Jug r_pollen - Lep d 2 - Lit s - Loc m - Lol spp. - Mus m 1 - Myt e - Ost e - Pan b…
Act d 2 - All s - Aln g 1 - Alt a 1 - Amb a - Amb a 4 - Ara h 8 - Ara h 9 - Art v - Art v 1 - Art v 3 - Asp f 3 - Bet v 1 - Can f 1 - Can f_Fd1 - Can s - Cav p 1 - Cor a 1.0103 - Cor a 1.0401 - Cor a 8 - Cor a_pollen - Cry j 1 - Cuc p - Cup a 1 - Cyn d - Der f 1 - Der f 2 - Der p 1 - Der p 2 - Equ c 1 - Fag e - Fag s 1 - Fel d 1 - Fel d 4 - Fel d 7 - Fra a 1+3 - Gal d 1 - Gal d 2 - Gal d_white - …
Aca s - Aln g 1 - Api g 1 - Ara h 8 - Art v - Art v 1 - Bet v 1 - Bet v 2 - Can f 1 - Can f 4 - Can f 6 - Can f_Fd1 - Can f_male urine - Cic a - Cla h - Clu h 1 - Cor a 1.0103 - Cor a 1.0401 - Cor a_pollen - Cuc m 2 - Cyp c 1 - Dau c - Dau c 1 - Der f 1 - Der p 1 - Der p 23 - Der p 7 - Fag s 1 - Fel d 1 - Fel d 7 - Fra a 1+3 - Gad m - Gad m 1 - Gly m 4 - Hev b 8 - Jug r_pollen - Mal d 1 - Mala s …
Blo t 21 - Bos d_meat - Cav p 1 - Cyn d - Cyn d 1 - Der f 1 - Der f 2 - Der p 1 - Der p 2 - Der p 21 - Fel d 1 - Gly d 2 - Lep d 2 - Lol p 1 - Mala s 5 - Pas n - Pec spp. - Phl p 1 - Phl p 2 - Phl p 5.0101 - Phl p 6 - Phod s 1 - Phr c - Pla l - Sec c_pollen,1
Aca s - Api m - Api m 10 - Can f 1 - Can f 6 - Can f_Fd1 - Can f_male urine - Der p 23 - Equ c 1 - Fel d 1 - Fel d 4 - Fel d 7 - Gal d 1 - Gal d 2 - Gal d_white - Lol p 1 - Mala s 5 - Mus m 1 - Ory c 3 - Phl p 1 - Phl p 5.0101 - Phl p 6 - Phod s 1 - Rat n - Tyr p,1
Aca s - Ach d - Alt a 1 - Ani s 3 - Arg r 1 - Bla g 9 - Blo t 10 - Can f 6 - Chi spp. - Cic a - Cyn d - Cyn d 1 - Der f 2 - Der p 10 - Der p 2 - Der p 20 - Der p 21 - Der p 23 - Der p 5 - Fel d 1 - Gly d 2 - Hom g - Lep d 2 - Lit s - Loc m - Lol p 1 - Lol spp. - Mal d 2 - Myt e - Ost e - Pan b - Pec spp. - Pen m 1 - Pen m 2 - Per a - Per a 7 - Phl p 1 - Phod s 1 - Rud spp. - Ten m - Tri a aA_TI -…
Ana o 2 - Bla g 4 - Bos d_meat - Cyn d 1 - Equ c_meat - Gly m 5 - Lol p 1 - Mala s 6 - Ovi a_meat - Phl p 1 - Pol d - Pol d 5,1
Aca s - Act d 1 - Alt a 1 - Asp f 3 - Asp f 6 - Bos d 2 - Bos d 6 - Can f 1 - Can f 3 - Cap h_epithelia - Clu h - Clu h 1 - Cyn d 1 - Cyp c 1 - Der f 1 - Der f 2 - Der p 1 - Der p 2 - Der p 23 - Der p 5 - Equ c 3 - Fel d 1 - Fel d 2 - Fel d 4 - Fel d 7 - Gad m - Gad m 1 - Gad m 2+3 - Gal d_meat - Gly d 2 - Lep d 2 - Lol p 1 - Mus m 1 - Ost e - Ovi a_meat - Pas n - Phl p 1 - Phl p 2 - Phl p 5.0101…
Alt a 1 - Lol p 1 - Pas n - Phl p 1 - Phl p 2 - Phl p 5.0101 - Phl p 6 - Sec c_pollen,1
Alt a 1 - Der f 1 - Der f 2 - Der p 1 - Der p 2 - Der p 23 - Gly d 2 - Lep d 2 - Phl p 2,1
All c - Bro pa - Cla h - Cla h 8 - Clu h - Gad m 1 - Hev b 11 - Urt d - Vac m,1
Alt a 1 - Art v - Art v 1 - Bet v 2 - Cuc m 2 - Cyn d 1 - Der f 1 - Der f 2 - Der p 1 - Der p 2 - Der p 21 - Der p 23 - Der p 5 - Der p 7 - Gly d 2 - Lep d 2 - Mer a 1 - Phl p 12 - Pho d 2,1
Alt a 1 - Cyn d - Cyn d 1 - Fel d 1 - Phl p 1 - Phl p 2,1
Aca s - Act d 1 - Aln g 1 - Alt a 1 - Ara h 8 - Bet v 1 - Blo t 21 - Blo t 5 - Bos d 2 - Clu h 1 - Cor a 1.0103 - Cor a 1.0401 - Cor a_pollen - Cry j 1 - Cup a 1 - Cyn d 1 - Cyp c 1 - Der f 1 - Der f 2 - Der p 1 - Der p 2 - Der p 21 - Der p 23 - Der p 5 - Fag s 1 - Fel d 1 - Fra a 1+3 - Gad m - Gad m 1 - Gly d 2 - Gly m 4 - Jug r_pollen - Lep d 2 - Loc m - Lol p 1 - Mal d 1 - Mus m 1 - Pers a - P…
Aln g 1 - Alt a 1 - Api g 1 - Ara h 8 - Bet v 1 - Bet v 2 - Can f 1 - Can f 6 - Can f_Fd1 - Cor a 1.0103 - Cor a 1.0401 - Cuc m 2 - Cyn d - Cyn d 1 - Dau c - Dau c 1 - Equ c 3 - Fag s 1 - Fel d 1 - Fel d 7 - Fra a 1+3 - Gly m 4 - Hev b 8 - Lol p 1 - Mal d 1 - Mer a 1 - Mus m 1 - Phl p 1 - Phl p 12 - Phl p 2 - Phl p 5.0101 - Pho d 2 - Sec c_pollen,1
Aca s - Alt a 1 - Cyn d 1 - Der f 1 - Der f 2 - Der p 1 - Der p 2 - Der p 21 - Der p 23 - Der p 5 - Der p 7 - Fel d 1 - Gly d 2 - Lep d 2 - Tyr p,1
Aca s - Alt a 1 - Bos d 2 - Der f 1 - Der f 2 - Der p 1 - Der p 2 - Der p 23 - Der p 7 - Fel d 1 - Lep d 2 - Lol p 1 - Phl p 1 - Tyr p,1
Aca s - Act d 1 - Act d 5 - Bet v 1 - Bla g 4 - Blo t 21 - Blo t 5 - Can f 1 - Can f 2 - Can f 4 - Can f 6 - Cyn d - Cyn d 1 - Der f 1 - Der f 2 - Der p 1 - Der p 2 - Der p 21 - Der p 23 - Der p 5 - Der p 7 - Equ c 1 - Fel d 1 - Fel d 7 - Gal d 4 - Gly d 2 - Lep d 2 - Lol p 1 - Lol spp. - Mala s 5 - Par j 2 - Pas n - Phl p 1 - Pru p 3 - Rat n - Sac c - Sec c_pollen - Sola l - Tyr p - Tyr p 2,1
Aca s - Ach d - Alt a 1 - Ani s 3 - Arg r 1 - Blo t 10 - Can f 6 - Chi spp. - Cra c 6 - Cyn d - Cyn d 1 - Der f 1 - Der f 2 - Der p 1 - Der p 10 - Der p 2 - Der p 23 - Der p 5 - Der p 7 - Fel d 1 - Gly d 2 - Hom g - Lep d 2 - Lit s - Loc m - Lol spp. - Myt e - Ost e - Pan b - Pen m 1 - Per a - Per a 7 - Rud spp. - Ten m - Tyr p - Tyr p 2 - Urt d,1
Aca s - Ach d - Act d 1 - Ama r - Amb a - Amb a 4 - Ani s 3 - Ara h 1 - Ara h 8 - Arg r 1 - Art v - Art v 1 - Bet v 1 - Bla g 2 - Bla g 4 - Blo t 10 - Blo t 21 - Blo t 5 - Cap a - Car i - Cic a - Clu h 1 - Cor a 1.0103 - Cor a 1.0401 - Cor a_pollen - Cra c 6 - Cry j 1 - Cup a 1 - Cyn d - Cyn d 1 - Cyp c 1 - Dau c - Der f 1 - Der f 2 - Der p 1 - Der p 2 - Der p 20 - Der p 21 - Der p 23 - Der p 5 -…
Aca s - Ach d - Ani s 3 - Ara h 15 - Ara h 6 - Arg r 1 - Asp f 4 - Bla g 9 - Blo t 10 - Blo t 5 - Chi spp. - Cic a - Cyn d - Cyn d 1 - Der f 2 - Der p 10 - Der p 2 - Der p 20 - Der p 21 - Der p 23 - Der p 5 - Fag e - Gal d 1 - Gly d 2 - Hom g - Jug r_pollen - Lep d 2 - Lit s - Loc m - Lol p 1 - Lol spp. - Ory c 3 - Ost e - Pan b - Pen m 1 - Pen m 2 - Per a - Per a 7 - Pha v - Phl p 1 - Phl p 2 - …
Aca m - Act d 10 - Act d 2 - Ail a - All s - Aln g 1 - Ama r - Amb a - Amb a 1 - Amb a 4 - Ana o - Api g 2 - Api g 6 - Ara h 1 - Ara h 8 - Ara h 9 - Art v - Art v 1 - Art v 3 - Asp f 6 - Ave s - Ber e - Bet v 1 - Bet v 6 - Bos d 4 - Bos d 5 - Bos d 6 - Bos d 8 - Bos d_milk - Bro pa - Can f 1 - Can s - Can s 3 - Cap a - Cap h_epithelia - Cap h_milk - Car c - Car i - Car p - Che q - Cic a - Cit s -…
Alt a 1 - Amb a - Amb a 1 - Asp f 3 - Bet v 2 - Can f 1 - Can f 4 - Can f_Fd1 - Cry j 1 - Cuc m 2 - Der f 1 - Der f 2 - Der p 1 - Der p 2 - Der p 5 - Fel d 1 - Fel d 7 - Hev b 8 - Lep d 2 - Mer a 1 - Phl p 12 - Phl p 2 - Pho d 2 - Thu a - Ves v,1
Aca s - Alt a 1 - Blo t 21 - Blo t 5 - Cyn d - Cyn d 1 - Der f 1 - Der f 2 - Der p 1 - Der p 2 - Der p 20 - Der p 21 - Der p 23 - Der p 5 - Der p 7 - Gly d 2 - Lep d 2,1
Car c - Car i - Cla h 8 - Fel d 7 - Hev b 11 - Pho d 2 - Tri a aA_TI - Vac m,1
Alt a 1 - Bet v 1 - Cyn d - Cyn d 1 - Der f 2 - Der p 1 - Der p 2 - Der p 23 - Fel d 1 - Lep d 2 - Lol p 1 - Phl p 1 - Phl p 2,1
All s - Alt a 1 - Alt a 6 - Can f 1 - Can f 2 - Can f 4 - Can f 6 - Cic a - Cyn d - Cyn d 1 - Equ c 1 - Fel d 1 - Fel d 4 - Fel d 7 - Lol p 1 - Mus m 1 - Pap s - Phl p 1 - Phl p 2 - Phl p 5.0101 - Phl p 6 - Pop n - Sec c_pollen,1
Alt a 1 - Bet v 1 - Can f 3 - Can f 6 - Der f 1 - Der f 2 - Der p 1 - Der p 2 - Der p 23 - Equ c 1 - Fel d 1 - Fel d 2 - Fel d 4 - Gly d 2 - Lep d 2 - Lol p 1 - Mus m 1 - Pas n - Phl p 1 - Sus d 1,1
Act d 1 - Alt a 1 - Ana o - Bet v 6 - Car i - Cic a - Clu h - Clu h 1 - Cor a 9 - Cyp c 1 - Fag e - Fic b - Gad m - Gad m 1 - Gad m 2+3 - Gal d 1 - Gal d 2 - Gal d 4 - Gal d_white - Hel a - Hev b 11 - Jug r 1 - Jug r 2 - Jug r 4 - Jug r 6 - Jug r_pollen - Mus a - Ory c 3 - Pap s - Pha v - Phl p 1 - Pru du - Sal s - Sal s 1 - Sco s 1 - Ses i - Ses i 1 - Sol t - Thu a - Thu a 1 - Xip g 1,1
Aln g 1 - Alt a 1 - Bet v 1 - Cor a 1.0103 - Cor a 1.0401 - Cor a_pollen - Cyn d - Cyn d 1 - Der f 2 - Der p 2 - Der p 23 - Der p 7 - Fag s 1 - Fel d 1 - Fra a 1+3 - Lep d 2 - Lol p 1 - Mal d 1 - Phl p 1,1
Act d 10 - Aln g 1 - Ara h 8 - Bet v 1 - Blo t 5 - Cor a 1.0103 - Cor a 1.0401 - Cor a_pollen - Cyn d - Cyn d 1 - Der f 1 - Der f 2 - Der p 1 - Der p 2 - Der p 21 - Der p 23 - Der p 5 - Der p 7 - Fag s 1 - Fel d 1 - Fra a 1+3 - Gly d 2 - Gly m 4 - Lep d 2 - Lol p 1 - Mal d 1 - Mala s 6 - Pas n - Phl p 1 - Phl p 2 - Sec c_pollen,1
Alt a 1 - Asp f 3 - Pla l - Pla l 1 - Vac m,1
Alt a 1 - Api m - Api m 10 - Cyn d 1 - Der f 1 - Der f 2 - Der p 1 - Der p 2 - Der p 23 - Fel d 1 - Gly d 2 - Lep d 2 - Lol p 1 - Phl p 1 - Phl p 2,1
Aln g 1 - Alt a 1 - Api g 1 - Ara h 8 - Bet v 1 - Can f 6 - Cor a 1.0103 - Cor a 1.0401 - Cor a_pollen - Cyn d - Cyn d 1 - Dau c - Dau c 1 - Der f 1 - Der f 2 - Der p 1 - Der p 2 - Equ c 1 - Fag s 1 - Fel d 1 - Fra a 1+3 - Fra e - Fra e 1 - Gly m 4 - Lol p 1 - Mal d 1 - Ole e 1 - Pas n - Phl p 1 - Phl p 2 - Phl p 5.0101 - Phl p 6 - Sec c_pollen,1
Aln g 1 - Alt a 1 - Bet v 1 - Can f_Fd1 - Cor a 1.0103 - Cor a 1.0401 - Cor a_pollen - Cyn d - Cyn d 1 - Der f 2 - Der p 2 - Der p 21 - Der p 5 - Equ c 1 - Fag s 1 - Fel d 1 - Fel d 4 - Fra a 1+3 - Fra e - Fra e 1 - Gly d 2 - Gly m 4 - Lep d 2 - Lol p 1 - Mal d 1 - Ole e 1 - Ory c 2 - Pas n - Phl p 1 - Phl p 5.0101 - Phl p 6 - Phr c - Sec c_pollen,1
Alt a 1 - Der f 1 - Der f 2 - Der p 1 - Der p 2 - Der p 23 - Der p 5 - Fel d 1 - Gly d 2 - Lep d 2 - Tyr p 2,1
Aln g 1 - Alt a 1 - Ama r - Ara h 8 - Art v - Art v 1 - Bet v 1 - Can f 1 - Cap h_epithelia - Cic a - Cor a 1.0103 - Cor a 1.0401 - Cor a_pollen - Fag s 1 - Fel d 1 - Fel d 2 - Fra a 1+3 - Gly m 4 - Jug r_pollen - Lol spp. - Mal d 1 - Myt e - Ost e - Ovi a_meat - Pla a 2 - Pop n - Rat n - Sal k - Sus d 1 - Sus d_epithelia,1
Alt a 1 - Asp f 3 - Cyn d 1 - Der f 2 - Der p 2 - Der p 23 - Gly d 2 - Lol p 1 - Phl p 1 - Phl p 2 - Urt d,1
Act d 2 - Alt a 1 - Amb a - Amb a 1 - Art v - Art v 1 - Cyn d - Cyn d 1 - Fel d 1 - Lol p 1 - Myt e - Ost e - Phl p 1 - Phl p 2 - Sec c_pollen - Tri a 19,1
Act d 10 - Alt a 1 - Amb a - Amb a 1 - Ara h 9 - Cry j 1 - Fel d 1 - Fra a 1+3 - Mal d 3 - Pla a 3 - Pru p 3,1
Alt a 1 - Ara h 15 - Bla g 4 - Cla h 8 - Lol p 1 - Mala s 6 - Par j 2 - Phl p 1 - Phl p 2 - Sac c - Tri a 19 - Ves v 5,1
Alt a 1 - Amb a - Amb a 1 - Bet v 2 - Cry j 1 - Cuc m 2 - Hev b 8 - Mer a 1 - Phl p 12 - Pho d 2,1
Alt a 1 - Amb a 1 - Bet v 1 - Fel d 1 - Fra a 1+3,1
Alt a 1 - Amb a - Amb a 1 - Equ c 1,1
Alt a 1 - Amb a - Amb a 1 - Bet v 1 - Can f_Fd1 - Der f 1 - Der f 2 - Der p 2 - Fel d 1,1
Aln g 1 - Alt a 1 - Amb a - Amb a 1 - Bet v 1 - Bet v 2 - Can f_Fd1 - Cuc m 2 - Fag s 1 - Fel d 1 - Fel d 4 - Fel d 7 - Hev b 8 - Jug r_pollen - Mal d 1 - Mer a 1 - Phl p 12 - Pho d 2,1
Alt a 1 - Amb a 1 - Lol spp. - Mala s 6 - Myt e - Phl p 2,1
Alt a 1 - Amb a - Amb a 1 - Cry j 1 - Cuc m 2 - Fel d 1,1
Alt a 1 - Amb a - Amb a 1 - Art v 1 - Bet v 1 - Cry j 1 - Cuc m 2 - Fag s 1 - Fra a 1+3 - Ost e - Pho d 2 - Phod s 1 - Vac m - Ves v - Ves v 5,1
Alt a 1 - Amb a - Amb a 1 - Amb a 4 - Art v - Art v 1 - Asp f 3 - Can f_male urine - Can s - Cry j 1 - Cup a 1 - Cup s - Cyn d - Fel d 1 - Phl p 2 - Phr c - Raj c - Sec c_pollen,1
Alt a 1 - Amb a - Amb a 1 - Bet v 2 - Can f 1 - Cry j 1 - Cuc m 2 - Cup a 1 - Fel d 1 - Fel d 4 - Fel d 7 - Hev b 8 - Jug r_pollen - Mer a 1 - Phl p 12 - Phl p 2 - Pho d 2,1
Act d 1 - Act d 2 - Alt a 1 - Alt a 6 - Amb a - Amb a 1 - Amb a 4 - Art v - Art v 1 - Bla g 4 - Can f 1 - Can f 2 - Can f 4 - Can f 6 - Can f_Fd1 - Can f_male urine - Can s - Cap a - Cav p 1 - Che q - Cic a - Clu h 1 - Cor a 8 - Cuc p - Cyn d - Der p 7 - Equ c 1 - Equ c_meat - Equ c_milk - Fag e - Fel d 1 - Fel d 4 - Fel d 7 - Gal d 4 - Gal d 5 - Gly m 4 - Hel a - Hev b 1 - Hev b 11 - Hev b 5 - H…
Alt a 1 - Ama r - Amb a 1 - Api m - Api m 10 - Cry j 1 - Fel d 1 - Hev b 11 - Pas n - Sal k - Sec c_pollen,1
Amb a - Amb a 1 - Cla h - Cla h 8 - Der p 23 - Fel d 1,1
Alt a 1 - Amb a - Amb a 1 - Amb a 4 - Art v - Art v 1 - Blo t 10 - Can f 1 - Can f_Fd1 - Cry j 1 - Cup a 1 - Cup s - Fel d 1,1
Alt a 1 - Amb a - Amb a 1 - Amb a 4 - Blo t 10 - Cla h 8 - Cry j 1 - Fel d 1 - Ost e,1
Alt a 1 - Amb a - Amb a 1 - Bet v 2 - Can f 1 - Can f_male urine - Cry j 1 - Cuc m 2 - Fel d 1 - Hev b 8 - Jug r_pollen - Mer a 1 - Phl p 12 - Pho d 2,1
Blo t 5 - Cyn d 1 - Der f 1 - Der f 2 - Der p 1 - Der p 2 - Der p 23 - Der p 5 - Der p 7 - Gly d 2 - Mala s 5,1
Aln g 4 - Amb a - Amb a 1 - Ara h 9 - Blo t 5 - Clu h - Clu h 1 - Cor a 14 - Cor a 8 - Cyp c 1 - Der f 1 - Der f 2 - Der p 1 - Der p 2 - Der p 21 - Der p 23 - Der p 5 - Fel d 1 - Fra a 1+3 - Gad m - Gad m 1 - Gad m 2+3 - Gal d 4 - Gal d_white - Jug r 3 - Mal d 3 - Mala s 5 - Ory_meat - Pla a 3 - Pru p 3 - Raj c Parvalbumin - Sal s - Sal s 1 - Sco s - Sco s 1 - Thu a 1 - Vit v 1 - Xip g 1 - Zea m …
Act d 2 - Alt a 1 - Amb a - Amb a 1 - Bet v 1 - Can f 1 - Can f 4 - Can f_Fd1 - Can f_male urine - Car i - Clu h - Clu h 1 - Cry j 1 - Cup a 1 - Cup s - Cyp c 1 - Der p 23 - Equ c 1 - Equ c_meat - Fel d 1 - Fel d 7 - Fra a 1+3 - Gad m - Gad m 1 - Gad m 2+3 - Gal d_meat - Jug r 1 - Jug r 2 - Jug r 4 - Jug r 6 - Mes a 1_RUO - Phl p 2 - Phod s 1 - Raj c - Raj c Parvalbumin - Sal s - Sal s 1 - Sco s …
Alt a 1 - Amb a - Amb a 1 - Cry j 1 - Lol p 1 - Phl p 1,1
Alt a 1 - Amb a - Amb a 1 - Bet v 1 - Bet v 2 - Cor a 1.0103 - Cor a 1.0401 - Cor a_pollen - Cry j 1 - Cuc m 2 - Fag s 1 - Fel d 1 - Fra a 1+3 - Hev b 8 - Jug r_pollen - Mal d 1 - Mer a 1 - Phl p 12 - Pho d 2 - Vac m,1
Alt a 1 - Amb a - Amb a 1 - Api m - Api m 10 - Che a 1 - Cyn d - Cyn d 1 - Lol p 1 - Phl p 1 - Phl p 5.0101 - Raj c - Sal k,1
Aca m - Ama r - Cyn d - Fel d 1 - Fra e - Mala s 6 - Ost e - Pap s - Pha v - Phod s 1 - Phr c - Pop n - Sal k - Sec c_flour - Ses i 1 - Ulm c,1
All s - Alt a 1 - Amb a 1 - Cla h 8 - Equ c 3 - Fel d 1 - Phl p 2 - Pop n,1
Aca s - Alt a 1 - Amb a - Amb a 1 - Can f_Fd1 - Cry j 1 - Der f 1 - Der f 2 - Der p 1 - Der p 2 - Der p 23 - Der p 5 - Fel d 1 - Gly d 2 - Tyr p,1
Alt a 1 - Amb a - Amb a 1 - Der f 2 - Der p 2 - Der p 23 - Gly d 2 - Lep d 2,1
Ach d - Amb a - Amb a 1 - Amb a 4 - Api m - Api m 1 - Api m 10 - Art v - Art v 1 - Bet v 2 - Bla g 9 - Can f_Fd1 - Cuc m 2 - Der p 20 - Fel d 1 - Hev b 8 - Jug r_pollen - Mala s 5 - Mer a 1 - Pha v - Phl p 12 - Pho d 2 - Phr c - Pla l - Pop n - Raj c,1
Alt a 1 - Der f 2 - Der p 2 - Der p 23 - Lep d 2,1
Aln g 1 - Alt a 1 - Amb a - Amb a 1 - Api g 1 - Api g 6 - Ara h 8 - Art v - Art v 3 - Bet v 1 - Bet v 2 - Cor a 1.0103 - Cor a 1.0401 - Cor a_pollen - Cry j 1 - Cuc m 2 - Cup a 1 - Cyn d 1 - Dau c - Dau c 1 - Fag s 1 - Fra a 1+3 - Fra e - Fra e 1 - Gly m 4 - Hev b 8 - Jug r_pollen - Mal d 1 - Mala s 6 - Mer a 1 - Ole e 1 - Pha v - Phl p 1 - Phl p 12 - Phl p 2 - Pho d 2 - Pop n - Sal k - Sec c_flo…
Act d 1 - Act d 10 - Ail a - All c - All s - Alt a 1 - Alt a 6 - Amb a - Amb a 1 - Api g 2 - Ara h 9 - Art v - Art v 3 - Asp f 3 - Can f 1 - Can s - Can s 3 - Cap a - Car p - Cic a - Cla h - Cla h 8 - Clu h - Clu h 1 - Cor a 8 - Cry j 1 - Cyp c 1 - Der f 1 - Der p 1 - Fel d 1 - Fel d 4 - Fel d 7 - Fic b - Fra a 1+3 - Gad m - Gad m 1 - Gal d 3 - Hel a - Jug r 3 - Jug r_pollen - Len c - Mal d 3 - P…
Alt a 1 - Amb a - Amb a 1 - Can f_Fd1 - Cry j 1 - Fel d 1 - Pha v,1
Aln g 1 - Alt a 1 - Amb a - Amb a 1 - Amb a 4 - Ana o - Api g 1 - Ara h 8 - Ber e - Bet v 1 - Bet v 6 - Cic a - Clu h 1 - Cor a 1.0103 - Cor a 1.0401 - Cor a 11 - Cor a 9 - Cor a_pollen - Cry j 1 - Cuc m 2 - Cuc p - Cyn d - Cyp c 1 - Dau c - Dau c 1 - Fag e - Fag s 1 - Fel d 1 - Fra a 1+3 - Gal d 1 - Gal d 2 - Gal d_white - Gly m 4 - Hev b 8 - Jug r 4 - Lol p 1 - Mal d 1 - Mer a 1 - Phl p 1 - Phl…
Alt a 1 - Amb a - Amb a 1 - Api m - Api m 1 - Api m 10 - Bet v 1 - Bet v 2 - Can f_male urine - Cor a 1.0401 - Cry j 1 - Cuc m 2 - Der p 23 - Fel d 1 - Fra a 1+3 - Hev b 8 - Mer a 1 - Pha v - Phl p 12 - Pho d 2 - Pop n - Sec c_flour - Ten m,1
Alt a 1 - Amb a - Amb a 1 - Art v 1 - Bet v 2 - Cuc m 2 - Cup a 1 - Fel d 1 - Jug r_pollen - Mer a 1 - Pha v - Phl p 12 - Pho d 2 - Pla a 2,1
Alt a 1 - Amb a - Amb a 1 - Cry j 1 - Fel d 1 - Par j 2 - Pla a 2,1
Aca m - Act d 2 - Alt a 1 - Ama r - Amb a - Amb a 1 - Bet v 1 - Bet v 2 - Cuc m 2 - Equ c 3 - Fel d 1 - Gad m 2+3 - Hev b 8 - Jug r_pollen - Mal d 1 - Mer a 1 - Pas n - Phl p 12 - Phl p 2 - Pho d 2 - Phr c - Pol d 5 - Pop n - Pyr c - Sal k,1
Alt a 1 - Amb a - Amb a 1 - Bet v 1 - Cry j 1 - Fel d 1 - Jug r_pollen - Pha v - Sal k - Ves v 5,1
Act d 2 - Alt a 1 - Amb a 1 - Asp f 3 - Bet v 1 - Phl p 2,1
Alt a 1 - Amb a - Amb a 4 - Bet v 1 - Cor a 1.0401 - Der f 1 - Der f 2 - Der p 1 - Der p 2 - Der p 23 - Der p 5 - Der p 7 - Fag s 1 - Jug r_pollen - Mal d 1 - Pha v - Pop n,1
Alt a 1 - Amb a - Amb a 1 - Art v - Art v 1 - Can f_male urine - Cry j 1 - Cuc m 2 - Der f 2 - Der p 2 - Lep d 2 - Lol p 1 - Per a - Phl p 1 - Phl p 12 - Phl p 2 - Pho d 2 - Sec c_pollen - Ves v - Ves v 5,1
Alt a 1 - Phl p 2 - Pop n,1
Alt a 1 - Alt a 6 - Bet v 1 - Fag s 1 - Lol p 1 - Phl p 1 - Phl p 2,1
Alt a 1 - Amb a - Amb a 1 - Bet v 1 - Fel d 1 - Phl p 2,1
Aln g 1 - Alt a 1 - Amb a - Amb a 1 - Amb a 4 - Api g 1 - Ara h 8 - Art v - Art v 1 - Bet v 1 - Bet v 2 - Cap a - Cav p 1 - Cor a 1.0103 - Cor a 1.0401 - Cor a_pollen - Cuc m 2 - Dau c - Dau c 1 - Fag s 1 - Fel d 1 - Fra a 1+3 - Gly m 4 - Jug r_pollen - Mal d 1 - Mer a 1 - Pas n - Pers a - Phl p 12 - Phl p 5.0101 - Phl p 6 - Pho d 2 - Pla a 2 - Pla l - Pop n - Sal k - Sec c_pollen - Ulm c,1
Aca m - Ail a - All s - Alt a 1 - Ama r - Amb a - Amb a 1 - Amb a 4 - Ara h 15 - Art v - Art v 1 - Can s - Cap a - Che q - Cic a - Cor a_pollen - Cry j 1 - Cup a 1 - Cup s - Cyn d - Hel a - Hom s LF - Jug r 2 - Jug r 6 - Jug r_pollen - Mus a - Par j - Pas n - Phr c - Pis s - Pla a 2 - Pop n - Raj c - Sal k - Sec c_pollen - Ses i 1 - Ulm c,1
Alt a 1 - Amb a - Amb a 1 - Amb a 4 - Art v - Art v 1 - Bet v 1 - Cry j 1 - Cuc m 2 - Cup a 1 - Der p 21 - Dol spp - Fel d 1 - Gal d_meat - Lol p 1 - Ory_meat - Phl p 1 - Phl p 5.0101 - Phl p 6 - Pho d 2 - Pop n - Sal k - Sec c_pollen,1
Alt a 1 - Amb a - Amb a 1 - Asp f 3 - Bet v 1 - Bet v 2 - Can f_male urine - Cla h 8 - Cry j 1 - Cuc m 2 - Cup a 1 - Fel d 1 - Hev b 8 - Jug r_pollen - Mer a 1 - Phl p 12 - Phl p 2 - Pho d 2,1
Aca s - Amb a - Amb a 1 - Art v - Art v 1 - Bet v 1 - Bet v 2 - Can f_Fd1 - Cry j 1 - Cuc m 2 - Cyn d - Der f 1 - Der f 2 - Der p 1 - Der p 2 - Der p 23 - Der p 7 - Fag s 1 - Fel d 1 - Hev b 8 - Jug r_pollen - Mala s 6 - Mer a 1 - Pas n - Phl p 12 - Pho d 2 - Pyr c - Tyr p - Tyr p 2,1
Aca m - Act d 1 - All c - All s - Alt a 1 - Ama r - Amb a - Amb a 1 - Amb a 4 - Art v - Art v 1 - Bla g 4 - Bro pa - Can f_Fd1 - Can f_male urine - Cap a - Car i - Car p - Che q - Cla h - Cor a 11 - Cor a 8 - Cry j 1 - Cup a 1 - Cup s - Cyn d - Fag e - Fel d 1 - Fic b - Fic c - Fra a 1+3 - Hel a - Hom s LF - Jug r 2 - Jug r 6 - Jug r_pollen - Jun a - Lol spp. - Mac inte - Myt e - Ole e 1 - Ory c …
Alt a 1 - Amb a - Amb a 1 - Cyn d - Cyn d 1 - Lol p 1 - Pas n - Phl p 1 - Sec c_pollen,1
Alt a 1 - Amb a - Amb a 1 - Cry j 1 - Cup a 1 - Cyn d - Cyn d 1 - Der f 1 - Der f 2 - Der p 1 - Der p 2 - Der p 23 - Der p 5 - Der p 7 - Equ c 1 - Equ c 3 - Fel d 4 - Gal d_white - Gly d 2 - Hor v - Lep d 2 - Mus m 1 - Pha v - Phl p 2 - Rat n,1
Alt a 1 - Amb a - Amb a 1 - Bet v 2 - Bla g 9 - Cry j 1 - Cuc m 2 - Fel d 1 - Hev b 8 - Jug r_pollen - Mer a 1 - Pha v - Phl p 12 - Pho d 2 - Raj c,1
Alt a 1 - Amb a - Amb a 1 - Amb a 4 - Bet v 2 - Can f 1 - Can f 6 - Can f_Fd1 - Clu h 1 - Cry j 1 - Cuc m 2 - Cyp c 1 - Equ c 1 - Fel d 1 - Fel d 4 - Gad m 1 - Hev b 6.02 - Hev b 8 - Mer a 1 - Pas n - Pen m 3 - Pha v - Phl p 12 - Phl p 2 - Pho d 2 - Pop n - Sal s 1 - Sco s 1,1
Alt a 1 - Ama r - Amb a - Amb a 1 - Art v - Art v 1 - Cap a - Cry j 1 - Cup a 1 - Cyn d - Par j - Pas n - Phl p 2 - Phr c - Pla l - Pop n - Sal k - Sec c_pollen,1
Alt a 1 - Amb a - Amb a 1 - Art v - Art v 1 - Bet v 2 - Can f 1 - Can f_male urine - Cry j 1 - Cuc m 2 - Cyn d - Cyn d 1 - Equ c 3 - Fel d 7 - Hev b 8 - Jug r_pollen - Lol p 1 - Mer a 1 - Par j 2 - Phl p 1 - Phl p 12 - Phl p 2 - Pho d 2,1
Alt a 1 - Amb a - Amb a 1 - Blo t 5 - Der f 1 - Der f 2 - Der p 1 - Der p 2 - Der p 21 - Der p 23 - Der p 5 - Der p 7 - Fel d 1 - Gly d 2 - Mus m 1,1
Alt a 1 - Amb a - Amb a 1 - Bet v 1 - Can f 1 - Can f 2 - Can f 4 - Fag s 1 - Fel d 1 - Fel d 7,1
Alt a 1 - Amb a - Amb a 1 - Amb a 4 - Can f 1 - Can f_male urine - Cry j 1 - Der f 1 - Der f 2 - Der p 1 - Fel d 1 - Fel d 7 - Vac m,1
Alt a 1 - Amb a - Amb a 1 - Can f_male urine - Cry j 1 - Cup a 1 - Fel d 1 - Mus m 1 - Pha v - Pop n - Raj c,1
Act d 1 - Ail a - Alt a 1 - Ama r - Amb a - Amb a 1 - Bet v 6 - Bla g 9 - Bos d 6 - Bos d 8 - Bos d_milk - Can f_Fd1 - Cap a - Cap h_epithelia - Car i - Cic a - Cor a 8 - Cry j 1 - Cup a 1 - Cyn d - Cyn d 1 - Der f 1 - Der p 1 - Der p 20 - Der p 23 - Equ c 3 - Fag e 2 - Fel d 1 - Fra a 1+3 - Hel a - Hom s LF - Jug r_pollen - Lol p 1 - Pas n - Pen m 2 - Phl p 1 - Phl p 2 - Pla a 2 - Raj c - Sal k …
Alt a 1 - Alt a 6 - Cla h 8 - Lol p 1 - Phl p 1,1
Act d 1 - Act d 2 - Alt a 6 - Amb a - Amb a 1 - Amb a 4 - Art v - Art v 1 - Bet v 2 - Can f 6 - Can f_Fd1 - Cav p 1 - Cry j 1 - Cuc m 2 - Cup a 1 - Cyn d - Der f 2 - Der p 2 - Der p 23 - Equ c 1 - Fel d 1 - Fel d 4 - Hev b 8 - Lep d 2 - Mus m 1 - Ory c 3 - Pha v - Phl p 12 - Pho d 2 - Pla a 2 - Rat n - Sec c_pollen,1
Alt a 1 - Amb a - Amb a 1 - Cyn d 1 - Fel d 1 - Lol p 1 - Phl p 1 - Phl p 2 - Ves v 5,1
Aca s - Blo t 21 - Blo t 5 - Der f 1 - Der f 2 - Der p 1 - Der p 2 - Der p 21 - Der p 5 - Gly d 2 - Lep d 2 - Mala s 5 - Rat n - Thu a - Thu a 1 - Tyr p - Tyr p 2,1
Alt a 1 - Amb a - Amb a 1 - Amb a 4 - Art v 1 - Can f_male urine - Cry j 1 - Raj c,1
Alt a 1 - Amb a - Amb a 1 - Can f_Fd1 - Cry j 1 - Fel d 1 - Fel d 4,1
Aln g 1 - Alt a 1 - Amb a - Amb a 1 - Amb a 4 - Art v - Art v 1 - Bet v 1 - Chi spp. - Cor a 1.0103 - Cor a 1.0401 - Cor a_pollen - Cry j 1 - Cyn d - Cyn d 1 - Fag s 1 - Fel d 1 - Fra a 1+3 - Lol p 1 - Mal d 1 - Phl p 1,1
Aca s - Ach d - Amb a - Amb a 1 - Ani s 3 - Bet v 1 - Blo t 10 - Bos d_milk - Can f 1 - Can f 3 - Can f 4 - Can f_male urine - Chi spp. - Cla h 8 - Cry j 1 - Der p 10 - Fag s 1 - Fel d 1 - Fel d 2 - Fel d 7 - Fra e - Hom g - Lit s - Loc m - Ory_meat - Pan b - Pen m 1 - Per a - Per a 7 - Ten m - Tri a 19 - Tyr p,1
Alt a 1 - Amb a - Amb a 1 - Art v - Art v 1 - Bet v 2 - Can f 1 - Can f_Fd1 - Cuc m 2 - Der f 1 - Fel d 1 - Fel d 4 - Fel d 7 - Hev b 8 - Jug r_pollen - Mer a 1 - Phl p 12 - Pho d 2 - Rat n - Sal k - Ses i - Urt d,1
Alt a 1 - Amb a - Amb a 1 - Bet v 2 - Cry j 1 - Cuc m 2 - Hev b 8 - Jug r_pollen - Mer a 1 - Phl p 12 - Pho d 2,1
Aca m - Aln g 1 - Ama r - Amb a - Amb a 1 - Api g 1 - Ara h 8 - Bet v 1 - Bet v 2 - Can f 4 - Can f_Fd1 - Can f_male urine - Cit s - Cor a 1.0103 - Cor a 1.0401 - Cry j 1 - Cuc m 2 - Cup a 1 - Dau c - Dau c 1 - Equ c 1 - Fag s 1 - Fel d 1 - Fra a 1+3 - Fra e - Hev b 8 - Hor v - Jug r_pollen - Lol p 1 - Mala s 6 - Mer a 1 - Mus a - Ory c 3 - Pas n - Phl p 1 - Phl p 12 - Pho d 2 - Pla l - Pop n - P…
Alt a 1 - Amb a - Amb a 1 - Amb a 4 - Asp f 1 - Cry j 1 - Cuc m 2 - Phl p 12 - Pho d 2,1
Ama r - Amb a - Amb a 1 - Amb a 4 - Art v - Art v 1 - Can f_male urine - Jug r_pollen - Mala s 11 - Ory c 1 - Ory c 3 - Pas n - Raj c - Sal k 1 - Sec c_pollen,1
Alt a 1 - Cry j 1 - Phl p 2 - Phl p 5.0101,1
Aca m - Alt a 1 - Amb a - Amb a 1 - Amb a 4 - Bet v 1 - Bet v 2 - Bla g 4 - Can f 1 - Can f 4 - Cla h - Cor a 1.0103 - Cor a 1.0401 - Cry j 1 - Cuc m 2 - Equ c 3 - Fag s 1 - Fel d 1 - Fra a 1+3 - Hev b 8 - Jug r_pollen - Mer a 1 - Ory c 3 - Par j 2 - Pas n - Phl p 12 - Pho d 2 - Phr c - Pru p 3 - Sac c,1
Alt a 1 - Amb a - Amb a 1 - Can f 1 - Can f 3 - Can f 4 - Can f 6 - Can f_Fd1 - Can f_male urine - Cry j 1 - Equ c 1 - Fel d 1 - Fel d 4 - Fel d 7 - Lol p 1 - Phl p 1 - Phl p 2 - Sus d 1,1
Alt a 6 - Amb a - Amb a 1 - Bet v 2 - Bla g 4 - Cry j 1 - Cuc m 2 - Cyn d - Cyn d 1 - Der f 1 - Der f 2 - Der p 1 - Der p 2 - Der p 21 - Der p 23 - Der p 7 - Gal d_white - Gly d 2 - Hev b 8 - Jug r 2 - Jug r 6 - Jug r_pollen - Lep d 2 - Lol p 1 - Mer a 1 - Par j 2 - Pas n - Pen ch - Pha v - Phl p 1 - Phl p 12 - Pho d 2 - Sac c - Vac m,1
Alt a 1 - Amb a - Amb a 1 - Can f_Fd1 - Cav p 1 - Fel d 1,1
Alt a 1 - Amb a - Amb a 1 - Can f_Fd1 - Cry j 1 - Cuc m 2 - Der f 1 - Der f 2 - Der p 2 - Fel d 1 - Pha v - Pho d 2,1
Alt a 1 - Amb a - Amb a 1 - Ana o 2 - Api m - Api m 10 - Ara h 1 - Bet v 2 - Cry j 1 - Cuc m 2 - Cup a 1 - Der p 23 - Gad m 1 - Hev b 8 - Hom g - Jug r_pollen - Len c - Mer a 1 - Phl p 12 - Pho d 2 - Raj c,1
Alt a 1 - Clu h 1 - Cyp c 1 - Pha v - Sal s 1 - Sco s 1 - Thu a 1 - Tyr p,1
Alt a 1 - Amb a - Amb a 1 - Amb a 4 - Art v - Art v 1 - Cry j 1 - Lol spp. - Myt e - Ost e - Phl p 2,1
Ail a - Alt a 1 - Amb a - Amb a 1 - Bla g 9 - Can f 2 - Can f 4 - Can f 6 - Can f_Fd1 - Can f_male urine - Cav p 1 - Cry j 1 - Cyn d - Cyn d 1 - Der p 20 - Equ c 3 - Fel d 1 - Fel d 7 - Fic b - Fic c - Hom g - Lol p 1 - Ory c 1 - Pas n - Pen m 2 - Phl p 1 - Phl p 2 - Sus d 1 - Ves v 5,1
Aca s - Alt a 1 - Amb a - Amb a 1 - Amb a 4 - Ber e - Ber e 1 - Bet v 1 - Blo t 5 - Can f 3 - Car i - Clu h - Clu h 1 - Cry j 1 - Cup a 1 - Cyn d 1 - Cyp c 1 - Der p 21 - Der p 5 - Fag s 1 - Fel d 1 - Fel d 2 - Fra a 1+3 - Gad m - Gad m 1 - Jug r 1 - Jug r 2 - Jug r 4 - Jug r 6 - Mal d 1 - Ost e - Phl p 2 - Raj c - Raj c Parvalbumin - Sal s - Sal s 1 - Sco s 1 - Sus d 1 - Sus d_epithelia - Thu a …
Aca m - Alt a 1 - Ama r - Amb a - Amb a 1 - Bet v 2 - Cuc m 2 - Fel d 1 - Hev b 8 - Jug r_pollen - Mer a 1 - Phl p 12 - Phl p 2 - Pho d 2 - Raj c - Sal k,1
Alt a 1 - Amb a - Amb a 1 - Cap a - Car i - Cor a 11 - Cry j 1 - Cyn d - Cyn d 1 - Fag e - Fel d 1 - Hom s LF - Jug r 2 - Jug r 6 - Lol p 1 - Pas n - Phl p 1 - Pla a 2 - Sec c_pollen - Sol t - Sola l,1
Alt a 1 - Amb a - Amb a 1 - Amb a 4 - Art v - Art v 1 - Bet v 2 - Can f 1 - Cuc m 2 - Fel d 1 - Mer a 1 - Phl p 12 - Phl p 2 - Pho d 2 - Raj c - Ves v 5,1
Alt a 1 - Amb a - Amb a 1 - Art v 1 - Bet v 1 - Phl p 5.0101 - Pop n - Sec c_pollen,1
Alt a 1 - Amb a - Amb a 1 - Amb a 4 - Art v - Art v 1 - Asp f 6 - Cla h - Cla h 8 - Fel d 1 - Phl p 2 - Pis s,1
Aca m - Alt a 1 - Amb a - Amb a 1 - Bet v 1 - Cor a 1.0401 - Cry j 1 - Der f 1 - Der f 2 - Der p 1 - Der p 2 - Der p 23 - Der p 7 - Fel d 1 - Fra a 1+3 - Gly d 2 - Lep d 2 - Mal d 1 - Tyr p - Ves v 5,1
Alt a 1 - Can f_male urine - Cry j 1 - Cup a 1 - Phl p 2,1
Alt a 1 - Der f 2 - Der p 2 - Der p 23 - Gly d 2 - Lep d 2 - Tyr p - Tyr p 2,1
Aca s - Aln g 4 - Alt a 1 - Alt a 6 - Asp f 3 - Can f_male urine - Der p 7 - Par j 2 - Per a 7 - Phl p 2 - Tyr p - Vac m,1
Alt a 1 - Amb a - Amb a 4 - Der p 23 - Lol spp. - Myt e - Ost e - Phl p 2,1
Alt a 1 - Amb a - Amb a 1 - Bet v 2 - Cry j 1 - Cuc m 2 - Der f 2 - Der p 2 - Der p 21 - Der p 23 - Der p 5 - Fel d 1 - Gly d 2 - Hev b 8 - Jug r_pollen - Mer a 1 - Mus m 1 - Phl p 12 - Phl p 2 - Pho d 2 - Ves v 5,1
Alt a 1 - Mala s 5 - Pha v - Phl p 2 - Pol d 5 - Ves v 5,1
Aca s - Ama r - Amb a 1 - Can f 1 - Can f 4 - Der f 1 - Der f 2 - Der p 1 - Der p 2 - Der p 23 - Der p 7 - Fel d 1 - Gly d 2 - Lep d 2 - Mala s 6 - Sal k 1 - Tyr p,1
Act d 2 - Alt a 1 - Amb a - Amb a 1 - Amb a 4 - Art v - Art v 1 - Can f 1 - Can f 2 - Can f 3 - Can f 4 - Can f 6 - Can f_male urine - Cav p 1 - Cyn d - Cyn d 1 - Equ c 1 - Fel d 1 - Fel d 2 - Fel d 7 - Lol p 1 - Ory c 1 - Ovi a_meat - Phl p 1 - Phl p 2 - Sola l 6 - Sus d 1 - Ten m,1
Aca s - Ach d - Blo t 21 - Blo t 5 - Cra c 6 - Cry j 1 - Cyn d - Cyn d 1 - Der f 1 - Der f 2 - Der p 1 - Der p 2 - Der p 21 - Der p 23 - Der p 5 - Der p 7 - Fel d 1 - Gly d 2 - Lep d 2 - Mala s 5 - Ten m - Tyr p - Ves v - Ves v 1,1
Alt a 1 - Amb a - Amb a 1 - Bet v 1 - Can f 1 - Can f 2 - Can f 4 - Can f_male urine - Cry j 1 - Fel d 1 - Phl p 5.0101 - Phl p 6 - Sec c_pollen,1
Act d 1 - Aln g 1 - Alt a 1 - Amb a - Amb a 1 - Ana o - Ana o 3 - Bet v 1 - Bet v 2 - Cor a 1.0103 - Cor a 1.0401 - Cry j 1 - Cuc m 2 - Fag s 1 - Fel d 1 - Fel d 4 - Fic c - Fra a 1+3 - Gly m 4 - Hev b 8 - Hor v - Jug r 1 - Jug r_pollen - Mal d 1 - Mer a 1 - Pha v - Phl p 12 - Pho d 2 - Pis v 1 - Raj c,1
Alt a 1 - Amb a - Amb a 1 - Amb a 4 - Art v - Art v 1 - Cry j 1 - Cyn d - Der f 1 - Der f 2 - Der p 1 - Der p 2 - Der p 23 - Fel d 1 - Gly d 2 - Lep d 2 - Pha v - Phl p 2 - Phr c - Pla a 2 - Pop n - Sec c_pollen - Tyr p 2,1
Alt a 1 - Amb a - Amb a 1 - Ara h 8 - Bet v 1 - Can f_Fd1 - Can f_male urine - Cor a 1.0103 - Cor a 1.0401 - Der f 2 - Der p 2 - Der p 23 - Fag s 1 - Fel d 1 - Fra a 1+3 - Gly m 4 - Lep d 2,1
Act d 10 - Alt a 1 - Amb a - Amb a 1 - Bet v 2 - Cry j 1 - Cuc m 2 - Jug r_pollen - Lol p 1 - Mer a 1 - Phl p 1 - Phl p 12 - Pho d 2 - Raj c,1
Ail a - Alt a 1 - Amb a - Amb a 1 - Ara h 15 - Cry j 1 - Raj c - Vac m,1
Alt a 1 - Amb a - Amb a 1 - Amb a 4 - Art v - Art v 1 - Can f_Fd1 - Can f_male urine - Cry j 1 - Cyn d - Cyn d 1 - Der f 1 - Der p 5 - Fel d 1 - Lol p 1 - Pas n - Phl p 1 - Raj c,1
Act d 2 - Alt a 1 - Pha v - Phl p 2 - Phl p 6,1
Alt a 1 - Amb a - Amb a 1 - Bet v 1 - Cor a 1.0103 - Cry j 1 - Fag s 1 - Fel d 1 - Lol p 1 - Phl p 1 - Phl p 2 - Phl p 5.0101 - Phl p 6 - Sec c_pollen,1
Aln g 1 - Alt a 1 - Amb a - Amb a 1 - Amb a 4 - Art v - Art v 1 - Bet v 1 - Bet v 2 - Bla g 1 - Cor a 1.0103 - Cor a 1.0401 - Cor a_pollen - Cry j 1 - Cuc m 2 - Cyn d - Fag s 1 - Hev b 8 - Jug r_pollen - Mal d 1 - Mer a 1 - Phl p 1 - Phl p 12 - Pho d 2 - Sola l 6,1
Alt a 1 - Amb a - Amb a 1 - Amb a 4 - Art v - Art v 1 - Cry j 1,1
Alt a 1 - Amb a - Amb a 1 - Asp f 3 - Cla h 8 - Cyn d - Cyn d 1 - Der f 1 - Der p 1 - Lol p 1 - Phl p 1 - Phl p 2 - Phl p 5.0101,1
Act d 2 - Aln g 1 - Alt a 1 - Amb a 1 - Bet v 1 - Blo t 5 - Cyn d - Cyn d 1 - Der f 1 - Der f 2 - Der p 1 - Der p 2 - Der p 21 - Der p 23 - Der p 5 - Der p 7 - Fag s 1 - Fel d 1 - Fel d 7 - Gly d 2 - Lep d 2 - Lol p 1 - Pas n - Phl p 1 - Phl p 2 - Tyr p - Tyr p 2,1
Alt a 1 - Amb a - Amb a 1 - Ara h 6 - Art v - Art v 1 - Asp f 3 - Cry j 1 - Fel d 1 - Phl p 2 - Raj c,1
Alt a 1 - Amb a - Amb a 1 - Cla h 8 - Cry j 1 - Cup a 1 - Phl p 2 - Ten m,1
Act d 2 - Alt a 1 - Amb a - Amb a 1 - Can f_male urine - Cry j 1 - Phl p 2,1
Alt a 1 - Amb a 1 - Der f 2 - Der p 2 - Fel d 1 - Lep d 2,1
Alt a 1 - Amb a - Amb a 1 - Asp f 3 - Car p - Cla h - Cla h 8 - Cup a 1 - Der f 1 - Fag s 1 - Fra a 1+3 - Mala s 6 - Pha v - Phl p 2 - Pop n,1
Ach d - Alt a 1 - Amb a - Amb a 1 - Amb a 4 - Art v - Art v 1 - Cry j 1 - Phl p 2 - Ten m,1
Alt a 1 - Asp f 3 - Cav p 1 - Der f 1 - Phl p 2 - Sal k,1
Alt a 1 - Amb a - Amb a 1 - Can f_male urine - Lol p 1 - Phl p 1,1
Act d 10 - Alt a 1 - Amb a - Amb a 1 - Bet v 2 - Cuc m 2 - Hev b 8 - Jug r_pollen - Mer a 1 - Phl p 12 - Pho d 2 - Pol d - Pol d 5 - Raj c - Vac m,1
Aca m - Ail a - Alt a 1 - Ama r - Amb a - Amb a 1 - Amb a 4 - Art v - Art v 1 - Asp f 3 - Bet v 1 - Bet v 2 - Can s - Che a - Clu h - Clu h 1 - Cor a 1.0103 - Cry j 1 - Cuc m 2 - Cyn d - Cyp c 1 - Fag s 1 - Fel d 1 - Fra e - Fra e 1 - Gad m - Gad m 1 - Hev b 8 - Jug r_pollen - Lol p 1 - Mer a 1 - Mor r - Mus m 1 - Ost e - Pas n - Pers a - Phl p 1 - Phl p 12 - Phl p 2 - Pho d 2 - Phod s 1 - Phr c …
Act d 1 - Act d 2 - Alt a 1 - Alt a 6 - Amb a - Amb a 1 - Amb a 4 - Art v - Art v 1 - Bla g 4 - Can f 1 - Can f 2 - Can f 4 - Can f 6 - Can f_Fd1 - Can f_male urine - Can s - Cap a - Cav p 1 - Che q - Cic a - Cor a 8 - Cuc p - Cyn d - Der p 7 - Equ c 1 - Equ c_meat - Equ c_milk - Fag e - Fel d 1 - Fel d 4 - Fel d 7 - Gal d 4 - Gal d 5 - Gly m 4 - Hel a - Hev b 1 - Hev b 11 - Hev b 5 - Hom g - Jug…
Alt a 1 - Amb a - Amb a 1 - Bet v 1 - Can f 1 - Can f 4 - Can f_male urine - Cry j 1 - Der f 1 - Equ c 1 - Fag s 1 - Phl p 2 - Rat n,1
Alt a 1 - Amb a - Amb a 1 - Can f 1 - Cry j 1 - Cyn d - Cyn d 1 - Lol p 1 - Phl p 1,1
Alt a 1 - Ama r - Amb a - Amb a 1 - Art v - Art v 1 - Bet v 1 - Bet v 2 - Cor a 1.0103 - Cor a_pollen - Cry j 1 - Cuc m 2 - Fag s 1 - Fel d 1 - Hev b 8 - Jug r_pollen - Mal d 1 - Mer a 1 - Phl p 12 - Phl p 2 - Pho d 2 - Pop n,1
Alt a 1 - Amb a - Amb a 1 - Can f 6 - Can f_male urine - Cry j 1 - Der f 1 - Der f 2 - Der p 1 - Der p 2 - Lep d 2,1
Aca m - Alt a 1 - Ama r - Amb a - Amb a 1 - Art v - Bet v 1 - Bet v 2 - Can f_male urine - Cor a 1.0103 - Cor a 1.0401 - Cry j 1 - Cuc m 2 - Cyn d - Fag s 1 - Fel d 1 - Fra a 1+3 - Hev b 8 - Jug r_pollen - Mer a 1 - Mor r - Pas n - Phl p 12 - Phl p 2 - Pho d 2 - Pop n - Pyr c - Raj c - Sal k,1
Alt a 1 - Amb a - Amb a 1 - Amb a 4 - Art v - Art v 1 - Bet v 2 - Cry j 1 - Cuc m 2 - Pho d 2,1
Alt a 6 - Amb a 1 - Asp f 6 - Mala s 11 - Mala s 6 - Mus a,1
Alt a 1 - Amb a - Amb a 1 - Art v - Art v 1 - Jug r_pollen - Lol p 1 - Phl p 1 - Phl p 5.0101 - Phl p 6 - Sec c_pollen,1
Aca s - Alt a 1 - Amb a - Amb a 1 - Ana o - Art v - Art v 1 - Blo t 5 - Der f 1 - Der f 2 - Der p 1 - Der p 2 - Der p 21 - Der p 23 - Der p 5 - Fel d 1 - Hel a - Jug r 1 - Jug r 4 - Phl p 2 - Phl p 5.0101 - Phl p 6 - Sec c_pollen - Tyr p,1
Aca m - Act d 2 - Alt a 1 - Amb a - Amb a 1 - Bet v 1 - Bet v 2 - Can f 1 - Can f_Fd1 - Cry j 1 - Cuc m 2 - Fag s 1 - Fel d 1 - Fel d 7 - Fra a 1+3 - Hev b 8 - Jug r_pollen - Lol p 1 - Mer a 1 - Pas n - Phl p 1 - Phl p 12 - Phl p 2 - Pho d 2,1
Alt a 1 - Cyn d 1 - Der f 2 - Der p 2 - Lol p 1 - Phl p 1 - Phl p 2,1
Alt a 1 - Ama r - Amb a - Amb a 1 - Ara h 9 - Bet v 2 - Can f_Fd1 - Cry j 1 - Cuc m 2 - Cup a 1 - Equ c 3 - Fel d 1 - Hel a - Hev b 8 - Jug r_pollen - Mer a 1 - Pan m - Pas n - Phl p 12 - Phl p 2 - Pho d 2 - Pis v 3 - Pyr c - Sal k - Sola l 6 - Sus d 1 - Tri s - Tyr p - Vit v 1 - Xip g 1,1
Act d 2 - Alt a 1 - Phl p 2 - Phl p 5.0101,1
Act d 2 - Amb a - Amb a 1 - Api g 2 - Api m - Api m 1 - Api m 10 - Art v 1 - Bla g 9 - Bos d_meat - Cap a - Cit s - Equ c_meat - Gly m 5 - Mala s 6 - Pha v - Pol d 5 - Pop n - Ten m - Vac m - Ves v 5 - Zea m,1
Ail a - Aln g 1 - Alt a 1 - Amb a - Amb a 1 - Amb a 4 - Art v - Art v 1 - Asp f 3 - Bet v 1 - Bet v 2 - Bla g 4 - Can f_male urine - Cla h 8 - Cor a 1.0103 - Cry j 1 - Cuc m 2 - Cup a 1 - Cyn d - Der p 7 - Fag s 1 - Fel d 1 - Hev b 8 - Par j 2 - Pen ch - Pers a - Pha v - Phl p 12 - Phl p 2 - Pho d 2 - Phod s 1 - Phr c - Pla a 2 - Pop n - Pru p 3 - Sac c - Sal k - Sec c_pollen - Ulm c,1
Alt a 1 - Amb a - Amb a 1 - Art v - Bet v 2 - Cuc m 2 - Hev b 8 - Jug r_pollen - Lol p 1 - Mer a 1 - Phl p 1 - Phl p 12 - Pho d 2,1
Alt a 1 - Amb a - Amb a 1 - Amb a 4 - Ani s 3 - Art v 1 - Der f 2 - Der p 2 - Fel d 1 - Phl p 2,1
Aln g 1 - Alt a 1 - Art v - Art v 1 - Bet v 1 - Can f_male urine - Cor a 1.0103 - Cor a 1.0401 - Cor a_pollen - Der f 1 - Der f 2 - Der p 1 - Der p 2 - Fag s 1 - Fel d 1 - Fra a 1+3 - Mala s 6 - Phl p 2,1
Alt a 1 - Amb a - Amb a 4 - Art v - Art v 1 - Phl p 2,1
Act d 2 - All s - Alt a 1 - Amb a - Amb a 1 - Ave s - Bet v 1 - Bla g 9 - Cup a 1 - Equ c 3 - Fel d 1 - Hel a - Pen m 3 - Phl p 2 - Pru p 3 - Raj c - Tri s - Ves v - Ves v 5,1
Aca s - Ach d - Alt a 1 - Blo t 21 - Blo t 5 - Chi spp. - Der f 1 - Der p 1 - Der p 11 - Der p 21 - Der p 5 - Hev b 3 - Hom g - Loc m - Pan b - Ten m - Tyr p - Tyr p 2,1
Alt a 1 - Can f_male urine - Der f 2 - Der p 2 - Der p 23 - Fel d 1 - Lep d 2 - Pha v - Pop n - Sec c_flour,1
Alt a 1 - Amb a - Amb a 1 - Cry j 1 - Der f 1 - Der p 1 - Phl p 2,1
Amb a - Amb a 1 - Can f_Fd1 - Cla h 8 - Cry j 1 - Der f 1 - Der f 2 - Der p 1 - Der p 2 - Fel d 1 - Pha v,1
Alt a 1 - Cla h 8 - Phl p 2,1
Alt a 1 - Amb a - Amb a 1 - Can f_male urine - Der f 1 - Der f 2 - Der p 1 - Der p 2 - Lep d 2 - Phl p 2,1
Alt a 1 - Amb a - Amb a 1 - Bet v 2 - Cuc m 2 - Cyn d 1 - Hev b 8 - Jug r_pollen - Lol p 1 - Mer a 1 - Phl p 1 - Phl p 12 - Phl p 2 - Pho d 2,1
Alt a 1 - Amb a - Amb a 1 - Bet v 1 - Cuc m 2 - Lol p 1 - Phl p 1 - Phl p 12 - Pho d 2,1
Alt a 1 - Amb a - Amb a 1 - Der f 2 - Der p 1 - Der p 2 - Der p 23 - Fel d 1,1
Alt a 1 - Alt a 6 - Amb a - Amb a 1 - Can f 4 - Can f_Fd1 - Fel d 1 - Ory c 1 - Ory c 2 - Ory c 3 - Pha v - Pop n - Sal k - Sec c_flour,1
Alt a 1 - Amb a - Amb a 1 - Amb a 4 - Art v - Art v 1 - Can f 1 - Cuc m 2 - Cup a 1 - Der f 2 - Der p 2 - Fel d 1 - Jug r_pollen - Lep d 2 - Lol spp. - Myt e - Pha v - Phl p 12 - Sec c_pollen,1
Alt a 1 - Amb a - Amb a 1 - Amb a 4 - Art v - Art v 1 - Bet v 1 - Bla g 9 - Can f_male urine - Cap a - Cyn d - Der p 20 - Fel d 1 - Ory c 3 - Pen m 2 - Phr c - Sec c_pollen,1
Alt a 1 - Amb a - Amb a 1 - Asp f 3 - Bet v 2 - Blo t 5 - Cuc m 2 - Der f 1 - Der f 2 - Der p 1 - Der p 2 - Der p 21 - Der p 23 - Der p 5 - Der p 7 - Fel d 1 - Gly d 2 - Hev b 8 - Jug r_pollen - Lep d 2 - Mer a 1 - Pha v - Phl p 12 - Phl p 2 - Pho d 2,1
Alt a 1 - Amb a - Amb a 1 - Bla g 4 - Par j 2,1
Aln g 1 - Alt a 1 - Amb a - Amb a 1 - Bet v 1 - Bet v 2 - Can f_Fd1 - Cor a 1.0103 - Cor a 1.0401 - Cor a_pollen - Cuc m 2 - Equ c 1 - Fag s 1 - Fel d 1 - Fel d 4 - Fra a 1+3 - Jug r_pollen - Lol p 1 - Mal d 1 - Ory c 3 - Pas n - Phl p 1 - Phl p 12 - Pho d 2,1
Amb a - Amb a 1 - Art v 3 - Asp f 3 - Bet v 1 - Cor a 8 - Fel d 1 - Fra a 1+3 - Mal d 3 - Mel g - Pla a 3 - Pop n - Pru p 3,1
Aln g 1 - Alt a 1 - Amb a - Amb a 1 - Bet v 1 - Can f 1 - Can f_Fd1 - Clu h - Clu h 1 - Cor a 1.0401 - Cry j 1 - Cuc m 2 - Cup a 1 - Cyn d - Cyn d 1 - Cyp c 1 - Der f 2 - Der p 2 - Fag s 1 - Fel d 1 - Fel d 4 - Fel d 7 - Gad m - Gad m 1 - Gad m 2+3 - Gly d 2 - Lep d 2 - Lol p 1 - Mer a 1 - Mus m 1 - Ory c 3 - Phl p 1 - Phl p 12 - Phl p 2 - Pho d 2 - Pop n - Sal k - Sal s - Sal s 1 - Sco s - Sco s…
Alt a 1 - Art v - Art v 1 - Cla h 8 - Pha v - Phl p 2 - Phod s 1 - Pop n - Ulm c,1
Alt a 1 - Phl p 5.0101,1
Act d 2 - Aln g 1 - Alt a 1 - Amb a - Amb a 1 - Amb a 4 - Art v - Art v 1 - Bet v 1 - Bet v 2 - Cor a 1.0103 - Cor a 1.0401 - Cor a_pollen - Cry j 1 - Cuc m 2 - Equ c 3 - Fag s 1 - Fel d 1 - Fra a 1+3 - Hev b 8 - Jug r_pollen - Lol p 1 - Mal d 1 - Mer a 1 - Pas n - Phl p 1 - Phl p 12 - Phl p 2 - Pho d 2 - Pop n,1
Alt a 1 - Amb a - Amb a 1 - Cla h - Cla h 8 - Cry j 1 - Equ c 3 - Par j 2 - Phl p 2,1
Alt a 1 - Amb a - Amb a 1 - Amb a 4 - Art v - Art v 1 - Cry j 1 - Cyn d - Fag e 2 - Fel d 1 - Phl p 2 - Sec c_pollen,1
Act d 2 - Alt a 1 - Amb a - Amb a 1 - Amb a 4 - Art v - Art v 1 - Bet v 2 - Can f 6 - Can f_male urine - Cry j 1 - Cuc m 2 - Cup a 1 - Fel d 1 - Hev b 8 - Mala s 6 - Mer a 1 - Phl p 12 - Phl p 2 - Pho d 2,1
Alt a 1 - Amb a - Amb a 1 - Cyn d 1 - Lol p 1 - Phl p 1 - Phl p 2,1
Alt a 1 - Amb a - Amb a 1 - Bet v 1 - Can f 1 - Cry j 1 - Fel d 1 - Mer a 1 - Phl p 12,1
Aca m - Alt a 1 - Ama r - Amb a - Amb a 1 - Amb a 4 - Art v - Art v 1 - Bet v 1 - Bet v 2 - Cor a 1.0401 - Cry j 1 - Cuc m 2 - Der f 2 - Der p 2 - Fag s 1 - Fel d 1 - Fra a 1+3 - Gly m 4 - Hev b 8 - Jug r_pollen - Lep d 2 - Mer a 1 - Pas n - Pha v - Phl p 12 - Pho d 2 - Pla l - Pop n - Pyr c - Sal k - Sec c_pollen,1
Ach d - Amb a - Amb a 1 - Ana o 2 - Ana o 3 - Art v 3 - Asp f 1 - Che a 1 - Cla h - Cla h 8 - Cor a 1.0103 - Cor a 14 - Cyn d - Cyn d 1 - Fag s 1 - Fra a 1+3 - Hev b 6.02 - Jug r 1 - Loc m - Lol p 1 - Mal d 3 - Pha v - Phl p 1 - Pis v 4_RUO - Pla l - Pla l 1 - Pru p 7_RUO - Ten m - Tri a 14 - Vit v 1,1
Asp f 1 - Ten m,1
Aca m - All s - Alt a 1 - Ama r - Amb a - Amb a 1 - Bla g 2 - Bla g 4 - Che a - Che q - Cla h - Cry j 1 - Cyn d - Equ c 3 - Fra e - Hor v - Jug r_pollen - Mala s 6 - Mor r - Ory c 3 - Ost e - Pan m - Par j 2 - Pas n - Pha v - Phl p 2 - Phr c - Pla l - Pop n - Sal k - Sec c_pollen - Ses i - Ses i 1 - Ulm c - Xip g 1,1
Aca s - Blo t 21 - Der f 1 - Der f 2 - Der p 1 - Der p 2 - Der p 21 - Der p 23 - Der p 5 - Der p 7 - Gly d 2 - Lep d 2 - Mala s 5 - Tyr p - Tyr p 2,1
Alt a 1 - Amb a - Amb a 1 - Asp f 3 - Cla h 8 - Fel d 1 - Phl p 2,1
Aca m - Aln g 1 - Alt a 1 - Ama r - Amb a - Amb a 1 - Api g 1 - Ara h 8 - Bet v 1 - Bet v 2 - Can f 1 - Can f 4 - Can f_male urine - Cor a 1.0103 - Cor a 1.0401 - Cor a_pollen - Cry j 1 - Cuc m 2 - Dau c - Dau c 1 - Der f 2 - Der p 2 - Fag e - Fag s 1 - Fel d 1 - Fel d 7 - Fra a 1+3 - Gly d 2 - Gly m 4 - Hev b 8 - Jug r_pollen - Lep d 2 - Mal d 1 - Mer a 1 - Pas n - Per a - Pers a - Phl p 12 - Ph…
Der f 1 - Der f 2 - Der p 1 - Der p 2 - Gly d 2 - Lep d 2 - Mala s 5 - Ves v 5,1
All s - Cyn d - Cyn d 1 - Der p 23 - Lol p 1 - Mala s 6 - Pas n - Phl p 1 - Phl p 2 - Phr c - Ses i 1 - Ves v 5,1
Aca s - Aln g 1 - Ama r - Amb a - Amb a 1 - Amb a 4 - Ara h 8 - Art v - Art v 1 - Asp f 6 - Bet v 1 - Bet v 2 - Can f 1 - Can f 4 - Can f_male urine - Can s - Cor a 1.0103 - Cor a 1.0401 - Cor a_pollen - Cuc m 2 - Cup a 1 - Cyn d - Cyn d 1 - Cyp c 1 - Dau c - Dau c 1 - Der f 1 - Der f 2 - Der p 1 - Der p 2 - Der p 23 - Fag s 1 - Fel d 7 - Fra a 1+3 - Gly d 2 - Hev b 8 - Jug r_pollen - Lep d 2 - L…
Alt a 1 - Art v 1 - Bet v 1 - Can f 1 - Fel d 1 - Pha v - Pop n - Sal k,1
Act d 10 - All s - Alt a 1 - Amb a - Amb a 1 - Api g 2 - Bet v 1 - Cor a 1.0103 - Cry j 1 - Cuc m 2 - Cup a 1 - Fag s 1 - Fel d 1 - Fel d 4 - Fra a 1+3 - Hom s LF - Jug r_pollen - Mal d 3 - Mer a 1 - Ole e 1 - Phl p 12 - Phl p 2 - Pho d 2 - Pla a 2 - Pla a 3 - Pop n - Pru p 3 - Vit v 1 - Zea m 14,1
Aca m - Ach d - Act d 10 - Act d 2 - Ail a - All c - All s - Alt a 1 - Ama r - Amb a - Amb a 1 - Ani s 3 - Api g 1 - Api g 2 - Api g 6 - Api m - Api m 1 - Ara h 1 - Art v - Art v 3 - Ave s - Ber e - Bet v 2 - Blo t 10 - Bro pa - Can f_Fd1 - Can s - Can s 3 - Cap a - Car c - Car i - Che a - Che q - Chi spp. - Cic a - Cit s - Clu h - Clu h 1 - Cor a 11 - Cor a 8 - Cry j 1 - Cuc m 2 - Cuc p - Cup a …
Alt a 1 - Che q,1
Aln g 1 - Alt a 1 - Bet v 1 - Fra a 1+3,1
Alt a 1 - Cap a - Che q,1
Alt a 6 - Gad m 1,1
Alt a 1 - Amb a 1 - Can f 1,1
Cla h 8 - Ole e 9,1
Alt a 1 - Can f 1 - Clu h 1 - Cyp c 1 - Fel d 7 - Gad m - Gad m 1 - Raj c Parvalbumin - Sal s 1 - Sco s 1 - Thu a 1 - Xip g 1,1
Alt a 1 - Amb a - Amb a 1 - Can f_Fd1 - Fel d 1 - Pha v - Phl p 5.0101 - Phl p 6,1
Alt a 1 - Bos d 6 - Bos d 8 - Bos d_milk,1
Alt a 1 - Can f 1,1
Alt a 1 - Fel d 1 - Pha v - Sec c_flour - Ses i,1
Alt a 1 - Amb a - Amb a 1 - Mus m 1,1
Cla h 8 - Gal d_white,1
Mala s 11 - Ves v 5,1
Aln g 1 - Ara h 8 - Bet v 1 - Cor a 1.0103 - Cor a 1.0401 - Cor a_pollen - Cry j 1 - Dau c 1 - Fag s 1 - Fel d 1 - Fra a 1+3 - Gly m 4 - Mal d 1 - Mala s 11 - Pop n - Sec c_flour,1
Bet v 1 - Bet v 2 - Blo t 5 - Cuc m 2 - Cyn d - Cyn d 1 - Der f 2 - Der p 2 - Der p 21 - Der p 5 - Der p 7 - Gal d 2 - Gal d_white - Gly d 2 - Hev b 8 - Jug r_pollen - Lol p 1 - Mala s 6 - Mer a 1 - Phl p 1 - Phl p 12 - Pho d 2 - Tyr p,1
Alt a 1 - Cor a 11 - Cor a 14,1
Aln g 1 - Api g 1 - Ara h 1 - Ara h 8 - Art v 1 - Bet v 1 - Cor a 1.0103 - Cor a 1.0401 - Cor a_pollen - Cyn d 1 - Dau c - Dau c 1 - Fag s 1 - Fic c - Fra a 1+3 - Gly m 4 - Lol p 1 - Mal d 1 - Mala s 11 - Mala s 5 - Phl p 1,1
Alt a 1 - Ana o - Ber e - Bet v 1 - Bos d 4 - Bos d 8 - Bos d_milk - Can f 1 - Can f 2 - Cap h_epithelia - Cap h_milk - Che q - Cic a - Cor a 11 - Cor a 9 - Equ c_milk - Fag s 1 - Fel d 7 - Gal d 4 - Gal d_white - Gly m 6 - Hel a - Jug r 4 - Ovi a_milk - Pap s - Phl p 2 - Sin - Sin a 1,1
Aca s - Ach d - Aln g 4 - Ani s 3 - Ara h 6 - Arg r 1 - Bla g 2 - Blo t 10 - Can f 2 - Can f 6 - Chi spp. - Cla h - Clu h - Der p 1 - Der p 10 - Der p 5 - Equ c 3 - Fel d 4 - Gly d 2 - Hom g - Lep d 2 - Lit s - Loc m - Lol spp. - Mal d 2 - Mus m 1 - Myt e - Ost e - Pan b - Pec spp. - Pen m 1 - Pen m 4 - Per a - Per a 7 - Phl p 2 - Phl p 7 - Rud spp. - Sal s 1 - Sol spp. - Ten m - Tyr p - Ves v 1,1
Ani s 3 - Blo t 10 - Der p 10 - Mala s 5 - Ten m,1
Act d 10 - Act d 2 - Api g 2 - Bos d 5 - Bos d 6 - Bos d 8 - Bos d_milk - Cam d - Cap h_epithelia - Cap h_milk - Gal d 4 - Gal d_yolk - Hel a - Ory_meat - Ovi a_milk - Pen ch - Pru p 3 - Sus d 1,1
Aln g 1 - Alt a 1 - Api g 1 - Ara h 8 - Art v - Art v 1 - Bet v 1 - Blo t 5 - Can f 1 - Cor a 1.0103 - Cor a 1.0401 - Cor a_pollen - Cyn d - Cyn d 1 - Dau c - Dau c 1 - Der f 1 - Der f 2 - Der p 1 - Der p 2 - Der p 21 - Der p 23 - Der p 5 - Equ c 1 - Fag e 2 - Fag s 1 - Fel d 1 - Fel d 7 - Fra a 1+3 - Lol p 1 - Mal d 1 - Pas n - Phl p 1 - Phl p 2 - Phl p 5.0101 - Phl p 6 - Phod s 1 - Sec c_pollen…
Alt a 1 - Can f 4 - Can f 6 - Can f_male urine - Fel d 1,1
Api m - Api m 1 - Api m 10 - Asp f 3,1
Act d 2 - Aln g 1 - Ara h 9 - Bos d_meat - Car c - Der p 23 - Equ c_meat - Equ c_milk - Fag e - Gal d 2 - Gly m 5 - Jug r 6 - Mala s 6 - Urt d - Vac m,1
Asp f 6 - Der p 23 - Fel d 1 - Mala s 11 - Ory c 3,1
Alt a 1 - Lol p 1 - Mes a 1_RUO - Phl p 1,1
Alt a 1 - Can f_male urine - Dol spp - Ves v 5,1
Alt a 1 - Amb a - Amb a 1 - Art v - Art v 1 - Art v 3 - Bet v 2 - Cuc m 2 - Phl p 1 - Phl p 5.0101 - Pho d 2,1
Alt a 1 - Bet v 1 - Can f_male urine - Cor a 1.0103 - Der f 2 - Der p 2 - Fel d 1 - Lol p 1 - Phl p 1 - Ves v,1
Act d 1 - Alt a 1 - Fel d 1 - Lol p 1 - Phl p 1,1
Alt a 1 - Amb a 1 - Fel d 1 - Phl p 1 - Phl p 2 - Phl p 5.0101,1
Aln g 1 - Bet v 1 - Can f_male urine - Cor a 1.0103 - Cor a 1.0401 - Cor a_pollen - Cuc p - Fag s 1 - Fra a 1+3 - Mala s 5,1
Asp f 6 - Der f 1 - Phl p 5.0101,1
Alt a 1 - Amb a - Amb a 1 - Bet v 1 - Bet v 2 - Cry j 1 - Cuc m 2 - Hev b 8 - Phl p 12 - Pho d 2,1
Der f 2 - Der p 2 - Fel d 1 - Mala s 11 - Phl p 2,1
Alt a 1 - Bet v 1 - Cor a 1.0103 - Cor a 1.0401 - Fag s 1,1
Act d 2 - Mala s 6 - Pol d - Pol d 5 - Ves v - Ves v 1 - Ves v 5,1
Alt a 1 - Cuc p - Cyn d - Cyn d 1 - Phl p 1 - Pop n - Sal k - Sec c_flour - Ses i - Sol t - Ulm c - Vac m,1
Amb a - Amb a 1 - Lol p 1 - Mala s 6 - Phl p 1,1
Alt a 1 - Can f 1 - Cla h 8 - Cor a 1.0103 - Fag s 1 - Fel d 1 - Fel d 7 - Gad m 1,1
Alt a 1 - Blo t 5 - Der p 21 - Der p 23 - Der p 5 - Der p 7,1
Alt a 1 - Amb a 1 - Can f 6 - Can f_male urine - Cyn d 1 - Der f 2 - Der p 2 - Fel d 1 - Lol p 1 - Mes a 1_RUO - Mus m 1 - Phl p 1 - Rat n,1
Act d 2 - Alt a 1 - Amb a - Amb a 1 - Ara h 8 - Bet v 1 - Can f 1 - Can f 2 - Can f 4 - Can f_Fd1 - Can f_male urine - Cor a 1.0103 - Cor a 1.0401 - Cor a_pollen - Cry j 1 - Der f 1 - Der f 2 - Der p 1 - Der p 2 - Equ c 1 - Fag s 1 - Fel d 1 - Fel d 7 - Fra a 1+3 - Gly d 2 - Gly m 4 - Lep d 2 - Mal d 1 - Par j 2 - Phl p 2,1
Aln g 1 - Alt a 1 - Amb a - Amb a 4 - Api g 1 - Ara h 8 - Art v - Art v 1 - Bet v 1 - Bet v 2 - Chi spp. - Cor a 1.0103 - Cor a 1.0401 - Cor a_pollen - Cuc m 2 - Dau c - Dau c 1 - Fag s 1 - Fra a 1+3 - Gly m 4 - Hev b 8 - Hom g - Jug r_pollen - Mal d 1 - Mer a 1 - Ory c 3 - Pan b - Pas n - Pen m 4 - Phl p 12 - Phl p 2 - Phl p 5.0101 - Phl p 6 - Pho d 2 - Sec c_pollen,1
Aln g 1 - Alt a 1 - Art v - Art v 1 - Asp f 3 - Bet v 1 - Can f 1 - Can f 6 - Can f_Fd1 - Cor a 1.0103 - Cor a 1.0401 - Cor a_pollen - Cry j 1 - Cup a 1 - Fel d 1 - Fel d 4 - Fel d 7 - Gly m 4 - Mes a 1_RUO - Phl p 1 - Phl p 2 - Phl p 5.0101 - Pla a 2 - Sec c_pollen,1
Alt a 1 - Art v 1 - Cyn d - Cyn d 1 - Fel d 1 - Lol p 1 - Pas n - Phl p 1,1
Amb a - Amb a 1 - Bet v 1 - Can f 1 - Can f 3 - Can f 6 - Cla h 8 - Cyn d - Equ c 1 - Equ c 3 - Equ c_meat - Fel d 1 - Fel d 2 - Fel d 4 - Fel d 7 - Lol p 1 - Mes a 1_RUO - Mus m 1 - Ovi a_meat - Pas n - Phl p 1 - Phl p 2 - Phr c - Rat n - Sec c_pollen - Sus d 1 - Sus d_epithelia - Sus d_meat,1
Alt a 6 - Bet v 1 - Cla h 8 - Cyn d - Cyn d 1 - Fag s 1 - Lol p 1 - Phl p 1,1
Aln g 1 - Alt a 1 - Amb a - Amb a 1 - Bet v 1 - Cla h 8 - Cor a 1.0103 - Cor a 1.0401 - Cor a_pollen - Cry j 1 - Der p 23 - Fag s 1 - Fel d 1 - Fel d 4 - Fra a 1+3 - Gly m 4 - Mal d 1 - Mes a 1_RUO - Phl p 5.0101 - Pop n,1
Act d 2 - Aln g 1 - Alt a 1 - Amb a - Amb a 1 - Bet v 1 - Bet v 2 - Can f 1 - Can f_Fd1 - Cor a 1.0103 - Cor a 1.0401 - Cor a_pollen - Cry j 1 - Cuc m 2 - Cyn d - Cyn d 1 - Der f 2 - Der p 2 - Der p 23 - Equ c 1 - Equ c_meat - Fag s 1 - Fel d 1 - Fel d 4 - Fel d 7 - Fra a 1+3 - Gly d 2 - Hev b 8 - Lep d 2 - Lol p 1 - Mac inte - Mer a 1 - Ory c 3 - Pas n - Phl p 1 - Phl p 12 - Phl p 2 - Pho d 2 - …
Act d 2 - Alt a 1 - Art v - Art v 1 - Bet v 1 - Bet v 2 - Bos d 4 - Can f_Fd1 - Cla h 8 - Cor a 8 - Cuc m 2 - Cuc p - Cyn d - Der f 2 - Der p 2 - Der p 23 - Equ c 3 - Fel d 1 - Gly d 2 - Lep d 2 - Mer a 1 - Pha v - Phl p 12 - Phl p 2 - Pho d 2 - Phr c - Pop n - Sal k 1 - Sec c_flour - Sec c_pollen - Tyr p,1
Aln g 1 - Alt a 1 - Ama r - Amb a - Amb a 1 - Api g 1 - Api m - Api m 1 - Ara h 8 - Art v - Bet v 1 - Can f_male urine - Cor a 1.0103 - Cor a 1.0401 - Cor a_pollen - Cry j 1 - Cup a 1 - Cyn d - Cyn d 1 - Dau c - Dau c 1 - Der f 2 - Der p 2 - Equ c 1 - Fag s 1 - Fel d 1 - Fra a 1+3 - Gly m 4 - Jug r_pollen - Lep d 2 - Lol p 1 - Mal d 1 - Mala s 6 - Phl p 1 - Phr c - Pop n - Sal k - Sec c_pollen,1
Aca m - Ama r - Amb a - Amb a 1 - Ana o - Ara h 1 - Ber e - Bet v 6 - Bos d 4 - Bos d 5 - Bos d 8 - Bos d_milk - Cap h_milk - Cic a - Cor a 9 - Cuc p - Gal d 1 - Gal d 2 - Gal d 3 - Gal d_white - Gal d_yolk - Gly m 6 - Jug r 1 - Jug r 4 - Len c - Mala s 6 - Ovi a_milk - Pap s - Par j 2 - Pis s - Pru du,1
Ach d - Amb a - Amb a 1 - Api g 6 - Art v - Art v 1 - Bet v 1 - Can f 1 - Can f_Fd1 - Cav p 1 - Equ c 1 - Fel d 1 - Fel d 4 - Fel d 7 - Lol p 1 - Mala s 11 - Mes a 1_RUO - Phl p 1,1
Act d 2 - Aln g 1 - Alt a 1 - Amb a - Amb a 1 - Amb a 4 - Art v - Art v 1 - Bet v 1 - Can f 1 - Can f_Fd1 - Can f_male urine - Cor a 1.0103 - Cor a 1.0401 - Cor a_pollen - Cry j 1 - Cup a 1 - Dau c - Dau c 1 - Equ c 1 - Fag s 1 - Fel d 1 - Gly m 4 - Mal d 1 - Ory c 3,1
Aca m - Ail a - Alt a 1 - Ama r - Amb a - Amb a 1 - Amb a 4 - Art v - Asp f 3 - Bet v 1 - Bet v 2 - Cry j 1 - Cuc m 2 - Cyn d - Cyn d 1 - Fag s 1 - Fel d 1 - Hev b 8 - Jug r_pollen - Lol p 1 - Mer a 1 - Pas n - Phl p 1 - Phl p 12 - Phl p 2 - Pho d 2 - Pla l - Pyr c - Sec c_pollen,1
Aln g 1 - Alt a 1 - Amb a 1 - Bet v 1 - Bla g 5 - Can f_Fd1 - Cla h 8 - Cor a 1.0103 - Cor a_pollen - Der p 5 - Equ c 1 - Fag s 1 - Fel d 1 - Fra a 1+3 - Lol p 1 - Mal d 1 - Mes a 1_RUO - Ost e - Phl p 1 - Phl p 5.0101 - Sal s 1,1
Api m - Api m 1 - Api m 10 - Asp f 1,1
Alt a 1 - Ama r - Bet v 1 - Can f_Fd1 - Cry j 1 - Cup a 1 - Cyn d - Cyn d 1 - Fag s 1 - Fel d 1 - Fel d 4 - Jug r_pollen - Lol p 1 - Phl p 1 - Phl p 2 - Pol d - Pol d 5 - Pop n - Sal k,1
Act d 1 - Aln g 1 - Alt a 1 - Amb a - Amb a 1 - Ara h 8 - Art v - Bet v 1 - Bet v 2 - Bet v 6 - Can f 1 - Cor a 1.0103 - Cor a 1.0401 - Cor a_pollen - Cry j 1 - Cuc m 2 - Cup a 1 - Cyn d - Cyn d 1 - Fag s 1 - Fel d 1 - Gly m 4 - Hev b 8 - Jug r_pollen - Lol p 1 - Mal d 1 - Mer a 1 - Pas n - Phl p 1 - Phl p 12 - Phl p 5.0101 - Phl p 6 - Pho d 2 - Phr c - Pla l - Pla l 1 - Pop n - Sec c_pollen,1
Ach d - Aln g 1 - Alt a 1 - Amb a - Amb a 1 - Api g 1 - Bet v 1 - Bla g 1 - Bla g 9 - Can f 3 - Can f_Fd1 - Cor a 1.0103 - Cor a 1.0401 - Cor a_pollen - Cra c 6 - Der p 20 - Fag s 1 - Fel d 1 - Fel d 2 - Fel d 4 - Fel d 7 - Fra a 1+3 - Gly m 4 - Loc m - Mal d 1 - Mes a 1_RUO - Ovi a_meat - Pen m 2 - Per a - Phl p 2 - Sal k 1 - Sus d 1 - Sus d_epithelia - Ten m,1
Aln g 1 - Alt a 1 - Amb a - Amb a 1 - Ana o - Ana o 3 - Api g 1 - Ara h 8 - Asp f 3 - Bet v 1 - Bet v 6 - Can f 2 - Can f_Fd1 - Clu h - Clu h 1 - Cor a 1.0103 - Cor a 1.0401 - Cor a_pollen - Cuc m 2 - Cyn d 1 - Cyp c 1 - Equ c 1 - Fag s 1 - Fel d 1 - Fel d 4 - Gad m - Gad m 1 - Gly m 4 - Jug r_pollen - Lol p 1 - Mal d 1 - Mala s 6 - Mus m 1 - Par j 2 - Phl p 1 - Phl p 2 - Phl p 5.0101 - Phr c - P…
Act d 2 - Aln g 1 - Alt a 1 - Api g 1 - Ara h 8 - Art v 3 - Bet v 1 - Can f_Fd1 - Cor a 1.0103 - Cor a 1.0401 - Cor a 8 - Cor a_pollen - Dau c - Dau c 1 - Fag s 1 - Fel d 1 - Fra a 1+3 - Gly m 4 - Jug r 3 - Lol p 1 - Mal d 1 - Mal d 3 - Phl p 1 - Pla a 3 - Pru p 3 - Pyr c - Vit v 1,1
Aca m - Act d 1 - Aln g 1 - Alt a 1 - Ama r - Amb a - Amb a 1 - Amb a 4 - Art v - Art v 1 - Bet v 1 - Bet v 2 - Can s - Cap a - Cit s - Cor a 1.0103 - Cry j 1 - Cuc m 2 - Cyn d - Cyn d 1 - Fag s 1 - Fel d 1 - Fra a 1+3 - Fra e - Fra e 1 - Hev b 8 - Jug r_pollen - Lol p 1 - Man i - Mer a 1 - Mor r - Ole e 1 - Pas n - Pers a - Phl p 1 - Phl p 12 - Phl p 5.0101 - Phl p 6 - Pho d 2 - Phr c - Pla l - …
Alt a 1 - Amb a - Amb a 1 - Bet v 1 - Can f_male urine - Cyn d - Cyn d 1 - Fel d 1 - Lol p 1 - Pas n - Phl p 1 - Sec c_pollen - Ves v - Ves v 5,1
Aln g 1 - Alt a 1 - Amb a - Amb a 1 - Api g 1 - Ara h 8 - Art v - Bet v 1 - Bet v 2 - Can f 1 - Can f 2 - Can f 3 - Can f 4 - Can f 6 - Cav p 1 - Cor a 1.0103 - Cor a 1.0401 - Cor a_pollen - Cuc m 2 - Cyn d - Cyn d 1 - Dau c - Dau c 1 - Der f 2 - Der p 2 - Equ c 1 - Equ c 3 - Fag s 1 - Fel d 1 - Fel d 2 - Fel d 4 - Fel d 7 - Fra a 1+3 - Gly d 2 - Gly m 4 - Hev b 8 - Jug r_pollen - Lol p 1 - Mal d…
Ach d - Act d 2 - Alt a 1 - Api m - Api m 1 - Api m 10 - Asp f 3 - Cyn d - Cyn d 1 - Loc m - Lol p 1 - Phl p 1 - Phl p 2 - Ten m,1
Aln g 1 - Alt a 1 - Amb a - Amb a 1 - Api g 1 - Ara h 8 - Art v - Art v 1 - Asp f 3 - Bet v 1 - Bet v 2 - Cor a 1.0103 - Cor a 1.0401 - Cor a_pollen - Cry j 1 - Cuc m 2 - Cyn d 1 - Dau c - Dau c 1 - Fag s 1 - Fel d 1 - Fra a 1+3 - Gly m 4 - Hev b 8 - Jug r_pollen - Lol p 1 - Mal d 1 - Mer a 1 - Pers a - Phl p 1 - Phl p 12 - Phl p 2 - Phl p 5.0101 - Phl p 6 - Pho d 2 - Pop n - Sal k - Sec c_pollen…
Act d 10 - Aln g 1 - Alt a 6 - Amb a - Amb a 1 - Api g 1 - Api g 2 - Ara h 8 - Ara h 9 - Art v - Art v 3 - Bet v 1 - Can f_Fd1 - Clu h - Clu h 1 - Cor a 1.0103 - Cor a 1.0401 - Cor a 8 - Cor a_pollen - Cry j 1 - Cuc m 2 - Cuc p - Cyn d - Cyn d 1 - Cyp c 1 - Dau c - Dau c 1 - Equ c 1 - Fag e - Fag s 1 - Fel d 1 - Fra a 1+3 - Gad m - Gad m 1 - Gly m 4 - Jug r 3 - Jug r_pollen - Lol p 1 - Mal d 1 - …
Aln g 1 - Alt a 1 - Ara h 8 - Bet v 1 - Bet v 2 - Cor a 1.0103 - Cor a 1.0401 - Cor a_pollen - Cuc m 2 - Cyn d - Cyn d 1 - Fag s 1 - Fel d 1 - Fra a 1+3 - Gly m 4 - Hev b 8 - Lol p 1 - Mac inte - Mal d 1 - Mer a 1 - Ory c 3 - Pas n - Phl p 1 - Phl p 12 - Pho d 2 - Sec c_pollen,1
Alt a 1 - Amb a 1 - Bos d 6 - Can f 1 - Can f 3 - Can f 4 - Can f_male urine - Der f 1 - Der f 2 - Der p 1 - Der p 2 - Der p 21 - Der p 23 - Der p 5 - Equ c 3 - Fel d 2 - Fel d 7 - Lep d 2 - Mes a 1_RUO - Ory_meat - Sus d 1 - Sus d_epithelia,1
Aln g 1 - Amb a - Amb a 4 - Ara h 8 - Art v - Art v 1 - Asp f 3 - Bet v 1 - Can f 1 - Can f_Fd1 - Cor a 1.0103 - Cor a 1.0401 - Cor a_pollen - Cyn d 1 - Der f 1 - Der p 1 - Fag s 1 - Fel d 1 - Fel d 7 - Fra a 1+3 - Gly m 4 - Lol p 1 - Pas n - Phl p 1 - Phl p 5.0101 - Phl p 6 - Phod s 1 - Pol d 5 - Sec c_pollen - Ves v - Ves v 5,1
Ara h 1 - Asp f 6 - Bla g 9 - Cyn d - Cyn d 1 - Der f 1 - Der f 2 - Der p 1 - Der p 2 - Der p 23 - Fel d 1 - Gal d_white - Lep d 2 - Lol p 1 - Mala s 6 - Phl p 1,1
Aln g 1 - Alt a 1 - Amb a - Amb a 1 - Api m 10 - Ara h 8 - Art v - Art v 1 - Bet v 1 - Bla g 9 - Can f 1 - Cor a 1.0103 - Cor a 1.0401 - Cor a_pollen - Cry j 1 - Der f 1 - Der f 2 - Der p 1 - Der p 2 - Der p 20 - Der p 21 - Der p 23 - Der p 5 - Der p 7 - Fag s 1 - Fel d 1 - Fel d 4 - Fel d 7 - Fra a 1+3 - Gly d 2 - Gly m 4 - Jug r_pollen - Lep d 2 - Mal d 1 - Pen m 2,1
Act d 1 - Alt a 1 - Amb a - Amb a 1 - Ana o - Ana o 3 - Api g 2 - Art v - Art v 1 - Art v 3 - Asp f 3 - Bet v 6 - Bla g 4 - Can f 2 - Can f 3 - Can f 4 - Can f 6 - Can f_male urine - Cap h_epithelia - Cav p 1 - Cic a - Clu h - Clu h 1 - Cor a 11 - Cry j 1 - Cuc m 2 - Cyp c 1 - Equ c 3 - Equ c_meat - Fel d 1 - Fel d 2 - Gad m - Gad m 1 - Hel a - Hor v - Jug r 2 - Jug r 3 - Jug r 6 - Jug r_pollen -…
Aca m - Alt a 1 - Amb a - Amb a 1 - Bet v 1 - Bet v 2 - Che q - Cor a_pollen - Cry j 1 - Cuc m 2 - Fel d 1 - Hev b 8 - Jug r_pollen - Lol p 1 - Mer a 1 - Mes a 1_RUO - Pas n - Pers a - Phl p 1 - Phl p 12 - Pho d 2 - Phr c - Raj c,1
Alt a 1 - Amb a - Amb a 4 - Art v - Art v 1 - Can f_Fd1 - Cyn d - Cyn d 1 - Fel d 1 - Lol p 1 - Ory c 3 - Pas n - Phl p 1 - Phl p 2 - Phl p 5.0101 - Phl p 6 - Phr c - Sec c_pollen,1
Alt a 1 - Amb a - Amb a 1 - Ara h 8 - Bet v 1 - Bla g 1 - Bla g 9 - Can f 1 - Can f 2 - Can f 4 - Can f 6 - Can f_male urine - Cav p 1 - Cor a 1.0103 - Cor a 1.0401 - Cor a_pollen - Cyn d - Cyn d 1 - Der p 20 - Equ c 1 - Fag s 1 - Fel d 1 - Fel d 4 - Fra a 1+3 - Gly m 4 - Lol p 1 - Mal d 1 - Ory c 1 - Ory c 2 - Ory c 3 - Pen m 2 - Phl p 1 - Phl p 2 - Phl p 5.0101 - Rat n - Sec c_pollen,1
Aln g 1 - Alt a 1 - Amb a - Amb a 1 - Api g 1 - Bet v 1 - Can f 1 - Can f 2 - Can f 4 - Can f_Fd1 - Clu h - Clu h 1 - Cor a 1.0103 - Cor a 1.0401 - Cor a_pollen - Cyp c 1 - Dau c - Dau c 1 - Fag s 1 - Fel d 1 - Fel d 7 - Fra a 1+3 - Gad m - Gad m 1 - Lol p 1 - Mal d 1 - Phl p 1 - Phl p 2 - Sal s - Sal s 1 - Sco s 1 - Thu a 1 - Xip g 1,1
Aca s - Ach d - Aln g 1 - Amb a - Amb a 1 - Amb a 4 - Ani s 3 - Art v - Art v 1 - Bet v 1 - Bla g 5 - Bla g 9 - Blo t 10 - Can f 6 - Can f_male urine - Chi spp. - Clu h - Cor a 1.0103 - Cor a 1.0401 - Cor a_pollen - Der p 10 - Der p 20 - Der p 5 - Fag s 1 - Fel d 1 - Fel d 4 - Fra a 1+3 - Hom g - Lit s - Loc m - Lol p 1 - Lol spp. - Mac i 2S Albumin - Mac inte - Mal d 1 - Mal d 2 - Mala s 5 - Mus…
Aln g 1 - Amb a - Amb a 4 - Art v - Art v 1 - Asp f 6 - Bet v 1 - Bla g 4 - Cor a 1.0103 - Cor a 1.0401 - Cor a_pollen - Cyn d - Cyn d 1 - Dau c 1 - Fag s 1 - Fel d 1 - Fra a 1+3 - Gal d 1 - Gal d 2 - Gal d_white - Lol p 1 - Mal d 1 - Mala s 11 - Mala s 5 - Mes a 1_RUO - Pas n - Phl p 1,1
Act d 2 - Alt a 1 - Asp f 3 - Che q - Fel d 1 - Mes a 1_RUO - Phl p 2 - Ves v 5,1
Aca s - Ach d - Amb a 1 - Ani s 3 - Arg r 1 - Blo t 10 - Can f_Fd1 - Chi spp. - Der f 1 - Der p 1 - Der p 10 - Der p 5 - Fag s 1 - Fel d 1 - Fra a 1+3 - Gly d 2 - Hom g - Lit s - Loc m - Lol p 1 - Lol spp. - Mal d 2 - Mala s 5 - Mus m 1 - Myt e - Ost e - Pan b - Pen m 1 - Per a - Per a 7 - Phl p 1 - Rat n - Rud spp. - Sol spp. - Ten m - Tyr p - Vac m,1
Act d 1 - Act d 2 - Aln g 1 - Alt a 1 - Amb a - Amb a 1 - Ara h 8 - Art v - Art v 1 - Bet v 1 - Bla g 2 - Bla g 4 - Can f 1 - Cla h - Cla h 8 - Clu h - Clu h 1 - Cor a 1.0103 - Cor a 1.0401 - Cor a_pollen - Cry j 1 - Cyp c 1 - Der f 2 - Der p 1 - Der p 2 - Dol spp - Equ c 3 - Equ c 4 - Fag s 1 - Fel d 1 - Fra a 1+3 - Fra e 1 - Gad m - Gad m 1 - Gly d 2 - Lep d 2 - Lol p 1 - Par j 2 - Pas n - Phl …
Aln g 1 - Alt a 1 - Amb a - Amb a 1 - Amb a 4 - Api g 1 - Ara h 1 - Ara h 8 - Art v - Art v 1 - Bet v 1 - Can f 1 - Can f 6 - Cor a 1.0103 - Cor a 1.0401 - Cor a_pollen - Dau c - Dau c 1 - Equ c 1 - Fag s 1 - Fel d 1 - Fra a 1+3 - Mal d 1 - Sal k - Sec c_pollen - Ves v 5,1
Aca m - Act d 1 - Alt a 1 - Ama r - Amb a - Art v - Art v 1 - Asp f 3 - Bet v 1 - Can f_Fd1 - Fag s 1 - Fel d 1 - Fra a 1+3 - Hor v - Mal d 1 - Mala s 6 - Ory c 3 - Ory s - Pan m - Pas n - Phl p 1 - Pla l - Ulm c,1
Alt a 1 - Che q - Der f 1 - Der f 2 - Der p 1 - Der p 2 - Der p 23 - Gly d 2 - Lep d 2 - Sec c_flour,1
Ara h 9 - Art v 3 - Lol spp. - Mal d 3 - Mala s 6 - Pol d 5 - Ves v - Ves v 5,1
Aln g 1 - Alt a 1 - Amb a - Amb a 1 - Amb a 4 - Art v - Asp f 3 - Bet v 1 - Bet v 2 - Bla g 4 - Can f 4 - Cry j 1 - Cuc m 2 - Fag s 1 - Fra a 1+3 - Gal d_meat - Hev b 8 - Jug r_pollen - Lol p 1 - Mer a 1 - Phl p 1 - Phl p 12 - Phl p 2 - Pho d 2 - Vac m,1
Alt a 1 - Can f 1 - Can f_male urine - Mus m 1,1
Asp f 4,1
Ach d - Ail a - Alt a 1 - Amb a - Amb a 1 - Amb a 4 - Art v - Art v 1 - Bet v 2 - Can f_male urine - Cry j 1 - Cuc m 2 - Cup a 1 - Cyn d - Cyn d 1 - Der f 1 - Der p 23 - Fel d 1 - Hev b 8 - Jug r_pollen - Loc m - Lol p 1 - Mer a 1 - Mus m 1 - Pas n - Phl p 1 - Phl p 12 - Phl p 2 - Pho d 2 - Pol d - Pol d 5 - Ten m - Ves v 5,1
Alt a 1 - Amb a - Amb a 1 - Amb a 4 - Cyn d - Cyn d 1 - Der f 2 - Der p 2 - Fel d 1 - Lol p 1 - Phl p 1,1
Alt a 1 - Amb a - Amb a 1 - Cry j 1 - Der f 2 - Der p 1 - Der p 2 - Fel d 1 - Pha v,1
Alt a 1 - Amb a - Amb a 1 - Bet v 2 - Cry j 1 - Cuc m 2 - Cup a 1 - Fel d 1 - Hev b 8 - Jug r_pollen - Mer a 1 - Phl p 12 - Pho d 2,1
Ach d - Amb a - Amb a 1 - Bos d 4 - Bos d 8 - Bos d_milk - Can f 1 - Can f_Fd1 - Cry j 1 - Cup a 1 - Cyn d - Cyn d 1 - Der f 1 - Der f 2 - Der p 1 - Der p 2 - Der p 23 - Fel d 1 - Fel d 4 - Fel d 7 - Gal d 2 - Gal d 3 - Gal d_white - Gal d_yolk - Gly d 2 - Lep d 2 - Lol p 1 - Mala s 6 - Ovi a_milk - Par j 2 - Phl p 1 - Ten m,1
Alt a 1 - Amb a - Amb a 1 - Bet v 2 - Bos d 8 - Bos d_milk - Cry j 1 - Cuc m 2 - Hev b 8 - Jug r_pollen - Mer a 1 - Phl p 12 - Pho d 2,1
Amb a - Amb a 1 - Bet v 2 - Can f 6 - Can f_Fd1 - Cla h 8 - Cuc m 2 - Der f 1 - Der f 2 - Der p 1 - Der p 2 - Der p 21 - Der p 23 - Fel d 1 - Fel d 4 - Fel d 7 - Hev b 6.02 - Hev b 8 - Phl p 12 - Pho d 2 - Pis v 4_RUO - Pla l 1 - Rat n - Sin a 1,1
Alt a 1 - Amb a - Amb a 1 - Amb a 4 - Art v - Art v 1 - Cry j 1 - Sec c_pollen,1
Alt a 1 - Can f_male urine - Mus m 1,1
Amb a 1 - Can f 1 - Can f 6 - Cyn d 1 - Der f 2 - Der p 1 - Der p 2 - Fel d 1 - Fel d 7 - Gal d 1 - Hel a - Lep d 2 - Mala s 5,1
Act d 2 - Alt a 6 - Amb a - Amb a 1 - Mala s 6,1
Alt a 1 - Gal d 2 - Gal d 3 - Gal d_white - Pha v - Pop n - Sec c_flour,1
Aca m - Act d 2 - All s - Alt a 1 - Ama r - Amb a - Amb a 1 - Amb a 4 - Art v - Bet v 1 - Bet v 2 - Cor a 1.0401 - Cuc m 2 - Cyn d - Hev b 8 - Jug r_pollen - Lol p 1 - Man i - Mer a 1 - Mor r - Pas n - Phl p 1 - Phl p 12 - Phl p 2 - Pho d 2 - Pis s - Pop n - Pyr c - Raj c,1
Alt a 1 - Amb a - Amb a 1 - Cry j 1 - Ses i 1,1
Aca s - Alt a 1 - Der f 1 - Der f 2 - Der p 1 - Der p 2 - Der p 23 - Gly d 2,1
Alt a 1 - Amb a 1 - Cuc m 2 - Phl p 12 - Pho d 2 - Rat n,1
Alt a 1 - Equ c 3,1
Alt a 1 - Ana o - Ana o 3 - Art v - Art v 3 - Ber e - Cor a 11 - Cor a 14 - Cor a 8 - Cor a 9 - Cor a_pollen - Cuc p - Fag e - Fic c - Fra a 1+3 - Gal d 2 - Gal d_white - Gal d_yolk - Gly m 6 - Hel a - Jug r 3 - Jug r 4 - Mac inte - Mal d 3 - Pap s 2S Albumin - Pis v 1 - Pla a 3 - Pru du - Pru p 3 - Ses i - Ses i 1 - Vit v 1 - Zea m 14,1
Alt a 1 - Amb a - Amb a 1 - Cry j 1 - Pha v,1
Alt a 1 - Bla g 4 - Fel d 1 - Par j 2,1
Api m - Api m 1 - Asp f 3 - Blo t 10 - Der p 10,1
Alt a 1 - Art v 1 - Der p 23,1
Aca m - Ama r - Amb a - Amb a 1 - Amb a 4 - Ara h 2 - Ara h 3 - Art v - Bet v 2 - Bla g 4 - Bro pa - Can f 1 - Can f 6 - Can f_Fd1 - Can f_male urine - Cap a - Cav p 1 - Cit s - Cla h - Cry j 1 - Cuc m 2 - Cyp c 1 - Equ c 1 - Fel d 1 - Fel d 4 - Fel d 7 - Fra e - Gal d 4 - Gal d_white - Hev b 8 - Hor v - Jug r_pollen - Mer a 1 - Mus a - Ory c 1 - Ory c 2 - Ory c 3 - Par j 2 - Pas n - Pen ch - Per…
Ach d - Alt a 1 - Amb a - Amb a 1 - Api m - Api m 10 - Can f_male urine - Cry j 1 - Der f 1 - Der f 2 - Der p 1 - Der p 2 - Der p 23 - Lep d 2 - Loc m - Ory_meat - Ten m,1
Ail a - Alt a 1 - Amb a - Amb a 1 - Art v - Art v 3 - Cry j 1 - Cuc m 2 - Phl p 12 - Phl p 2 - Pho d 2,1
Alt a 1 - Amb a - Amb a 1 - Bet v 2 - Cry j 1 - Cuc m 2 - Fel d 1 - Hev b 8 - Jug r_pollen - Mer a 1 - Pas n - Phl p 12 - Phl p 2 - Pho d 2,1
Alt a 1 - Amb a - Amb a 1 - Amb a 4 - Art v - Art v 1 - Bet v 1 - Bet v 2 - Can f 1 - Can f 6 - Can f_male urine - Cor a 1.0103 - Cor a 1.0401 - Cry j 1 - Cuc m 2 - Cyn d - Cyn d 1 - Equ c 1 - Fag s 1 - Fel d 1 - Fel d 4 - Fel d 7 - Hev b 8 - Jug r_pollen - Lol p 1 - Mer a 1 - Pas n - Phl p 1 - Phl p 12 - Phl p 2 - Phl p 5.0101 - Phl p 6 - Pho d 2 - Phr c - Pyr c - Rat n - Sec c_pollen,1
Ach d - Alt a 1 - Can f_Fd1 - Fel d 1 - Phl p 2,1
Alt a 1 - Amb a - Amb a 1 - Can f_Fd1 - Fag e - Fel d 1 - Fel d 4 - Per a 7,1
Aca m - Ail a - All s - Aln g 1 - Alt a 1 - Ama r - Amb a - Amb a 1 - Api g 1 - Ara h 8 - Art v - Art v 1 - Bet v 1 - Bet v 2 - Bla g 4 - Can f 1 - Can f 6 - Cap a - Car i - Car p - Che q - Cic a - Cor a 1.0103 - Cor a 1.0401 - Cor a 11 - Cor a_pollen - Cry j 1 - Cuc m 2 - Cup a 1 - Cyn d - Cyn d 1 - Dau c - Dau c 1 - Fag e - Fag e 2 - Fag s 1 - Fel d 1 - Fel d 7 - Fic b - Fic c - Fra a 1+3 - Hel…
Alt a 1 - Amb a 1 - Cyn d 1 - Lol p 1 - Phl p 1,1
Alt a 1 - Amb a - Amb a 1 - Amb a 4 - Art v - Art v 1 - Cyn d - Equ c 3 - Phl p 2 - Phr c - Sec c_pollen - Tri a 19 - Zea m 14,1
Art v - Art v 1 - Can f 1 - Fel d 1 - Fel d 7 - Mala s 11 - Ory c 3,1
Aca s - Blo t 21 - Blo t 5 - Cla h 8 - Der f 2 - Der p 2 - Der p 21 - Der p 23 - Der p 5 - Gly d 2 - Lep d 2 - Pis v 4_RUO - Tyr p,1
Alt a 1 - Amb a - Amb a 1 - Can f_Fd1 - Cry j 1 - Der f 1 - Der f 2 - Der p 1 - Der p 2 - Fel d 1 - Gly d 2 - Lep d 2,1
Act d 10 - Alt a 1 - Amb a - Amb a 1 - Api g 2 - Api g 6 - Art v 3 - Can s 3 - Fag e - Fel d 1 - Fra a 1+3 - Gal d_white - Lol p 1 - Mal d 3 - Pan m - Phl p 1 - Phl p 2 - Pla a 3 - Pru p 3 - Sin - Sin a 1 - Vit v 1 - Zea m - Zea m 14,1
Alt a 1 - Amb a - Amb a 1 - Bet v 2 - Can f_male urine - Cry j 1 - Cuc m 2 - Jug r_pollen - Phl p 12 - Phl p 2 - Pho d 2,1
Act d 2 - Alt a 1 - Amb a - Amb a 1 - Bet v 2 - Cry j 1 - Cuc m 2 - Der f 1 - Der f 2 - Der p 2 - Der p 7 - Fel d 1 - Gly d 2 - Hev b 8 - Lep d 2 - Mer a 1 - Phl p 12 - Pho d 2 - Tyr p 2,1
Mala s 5 - Mus m 1,1
Act d 1 - All s - Amb a - Amb a 1 - Ana o - Api g 6 - Ara h 2 - Can f 1 - Can f_Fd1 - Car i - Cic a - Der f 1 - Der f 2 - Der p 1 - Der p 2 - Fel d 1 - Fel d 7 - Jug r 1 - Jug r 4 - Mala s 6 - Pis v 1 - Sus d 1,1
Alt a 1 - Amb a - Amb a 1 - Amb a 4 - Art v - Art v 1 - Bet v 2 - Can f 2 - Can f 6 - Can f_Fd1 - Cry j 1 - Cuc m 2 - Cup a 1 - Equ c 1 - Fel d 1 - Fel d 4 - Fel d 7 - Mer a 1 - Mus m 1 - Phl p 12 - Pho d 2,1
Alt a 1 - Der f 1 - Der p 1 - Der p 23 - Der p 7 - Phl p 2,1
Alt a 1 - Amb a - Amb a 1 - Cyn d - Cyn d 1 - Fel d 1 - Lol p 1 - Phl p 1 - Phl p 5.0101 - Phl p 6,1
Aln g 1 - Alt a 1 - Amb a - Amb a 1 - Bet v 1 - Bet v 2 - Cor a 1.0103 - Cor a_pollen - Cry j 1 - Cuc m 2 - Fag s 1 - Fra a 1+3 - Hev b 8 - Jug r_pollen - Mer a 1 - Par j 2 - Phl p 12 - Phl p 2 - Pho d 2 - Raj c,1
Act d 2 - Alt a 1 - Amb a - Amb a 1 - Amb a 4 - Art v - Art v 1 - Bet v 2 - Can f_male urine - Cry j 1 - Cuc m 2 - Cyn d - Fel d 1 - Hev b 8 - Jug r_pollen - Mer a 1 - Ory c 3 - Phl p 12 - Phl p 2 - Phl p 5.0101 - Phl p 6 - Pho d 2 - Sec c_pollen,1
Aca s - Ach d - Ana o - Ani s 3 - Ara h 6 - Arg r 1 - Asp f 4 - Ave s - Ber e - Blo t 10 - Blo t 5 - Che q - Chi spp. - Cic a - Cor a 11 - Cor a 9 - Cyn d - Cyn d 1 - Der f 1 - Der f 2 - Der p 1 - Der p 10 - Der p 2 - Der p 21 - Der p 23 - Der p 5 - Fag e - Gal d_white - Hel a - Hom g - Jug r 4 - Lep d 2 - Lit s - Loc m - Lol p 1 - Lol spp. - Mus m 1 - Myt e - Ory c 3 - Ost e - Pan b - Pap s - Pa…
Blo t 21 - Blo t 5 - Can f 1 - Cyn d - Cyn d 1 - Der f 1 - Der f 2 - Der p 1 - Der p 2 - Der p 23 - Der p 5 - Der p 7 - Dol spp - Fel d 1 - Fel d 7 - Gly d 2 - Mala s 5,1
Alt a 1 - Der f 2 - Der p 2 - Der p 23 - Gly d 2 - Lep d 2 - Lol p 1 - Myt e - Ost e - Pha v - Phl p 1 - Phl p 5.0101 - Phl p 6,1
Aca s - Ach d - Act d 1 - All s - Alt a 1 - Ani s 3 - Arg r 1 - Bet v 1 - Blo t 10 - Chi spp. - Cyn d - Cyn d 1 - Der f 1 - Der p 10 - Fra e - Fra e 1 - Hom g - Lit s - Loc m - Lol p 1 - Lol spp. - Mala s 5 - Myt e - Ole e 1 - Ory c 3 - Ost e - Pan b - Pec spp. - Pen m 1 - Per a - Per a 7 - Phl p 1 - Rat n - Rud spp. - Sol spp. - Ten m,1
Art v - Art v 1 - Asp f 6 - Cuc p - Der p 23 - Fel d 1 - Lup a - Mala s 11,1
Ach d - Art v - Art v 1 - Bet v 1 - Blo t 21 - Can f_Fd1 - Cor a 1.0401 - Cyn d 1 - Der f 1 - Der f 2 - Der p 1 - Der p 2 - Der p 21 - Der p 23 - Der p 5 - Der p 7 - Fag s 1 - Fel d 1 - Gly d 2 - Lep d 2 - Loc m - Mal d 1 - Mala s 5 - Ten m - Tyr p,1
Act d 2 - Alt a 1 - Asp f 3 - Cyn d 1 - Der f 1 - Der p 1 - Der p 23 - Lol p 1 - Ory c 3 - Pas n - Phl p 1 - Phl p 2,1
Alt a 1 - Lol p 1 - Phl p 1 - Phl p 2 - Phl p 5.0101 - Sec c_pollen,1
Aca s - Act d 1 - Act d 5 - Aln g 1 - Ana o - Api m - Api m 10 - Ara h 1 - Ara h 2 - Ara h 6 - Ave s - Ber e - Bet v 1 - Bet v 6 - Blo t 5 - Can f 4 - Can f_Fd1 - Car i - Cic a - Clu h - Clu h 1 - Cor a 1.0103 - Cor a 1.0401 - Cor a 11 - Cor a 14 - Cor a 9 - Cor a_pollen - Cuc p - Cyn d - Cyn d 1 - Cyp c 1 - Der f 1 - Der f 2 - Der p 1 - Der p 2 - Der p 21 - Der p 23 - Der p 5 - Der p 7 - Fag s 1…
All s - Alt a 1 - Bet v 1 - Cor a 1.0103 - Cry j 1 - Cup a 1 - Der f 2 - Der p 2 - Fag s 1 - Fel d 1 - Phl p 5.0101,1
Act d 2 - Aln g 4 - Alt a 1 - Amb a - Amb a 1 - Bet v 2 - Can f 1 - Can f 2 - Clu h - Clu h 1 - Cry j 1 - Cuc m 2 - Cup a 1 - Cyp c 1 - Gad m - Gad m 1 - Gad m 2+3 - Hev b 8 - Jug r_pollen - Mer a 1 - Phl p 1 - Phl p 12 - Phl p 7 - Pho d 2 - Raj c - Raj c Parvalbumin - Sal s - Sal s 1 - Sco s - Sco s 1 - Sol t - Thu a - Thu a 1 - Xip g 1,1
Alt a 1 - Bet v 1 - Cla h - Cor a 1.0103 - Cor a 11 - Cyn d - Cyn d 1 - Fag e - Fag s 1 - Gal d 1 - Gal d 2 - Gal d 3 - Gal d 4 - Gal d_white - Hor v - Len c - Lol p 1 - Phl p 1 - Phl p 5.0101 - Phl p 6 - Pop n - Sec c_flour - Sec c_pollen,1
Alt a 1 - Art v - Art v 1 - Bos d 2 - Cyn d - Cyn d 1 - Der f 1 - Der f 2 - Der p 1 - Der p 2 - Der p 23 - Gly d 2 - Jug r_pollen - Lep d 2 - Lol p 1 - Pas n - Phl p 1,1
Act d 2 - Alt a 1 - Bla g 4 - Car i - Che q - Cuc p - Cyn d - Cyn d 1 - Der p 7 - Fag e - Fag e 2 - Hel a - Lol p 1 - Lup a - Mac i 2S Albumin - Mac inte - Pap s - Pas n - Phl p 1 - Phl p 2 - Phl p 5.0101 - Phl p 6 - Pla l - Pla l 1 - Sec c_pollen - Sin a 1 - Tri fo,1
Can f 1 - Cyn d - Cyn d 1 - Der f 1 - Der f 2 - Der p 1 - Der p 2 - Der p 23 - Der p 5 - Fel d 1 - Fel d 7 - Lep d 2 - Lol p 1 - Mala s 6 - Phl p 1 - Phl p 5.0101 - Phl p 6 - Sec c_pollen,1
Alt a 1 - Cry j 1 - Cup a 1 - Der f 1 - Der p 1 - Der p 23 - Pla a 2 - Pop n,1
Aca s - Alt a 1 - Bet v 1 - Blo t 5 - Cyn d 1 - Der f 1 - Der p 1 - Der p 23 - Der p 5 - Fel d 4 - Mus m 1 - Pop n - Rat n,1
Aca m - Act d 10 - Ail a - All c - Ama r - Ana o - Ana o 2 - Ana o 3 - Api g 1 - Api g 2 - Api g 6 - Ara h 1 - Ara h 6 - Ara h 8 - Ara h 9 - Art v - Art v 1 - Art v 3 - Ave s - Ber e - Bet v 1 - Bet v 2 - Bet v 6 - Bos d 5 - Bos d 6 - Bos d 8 - Bos d_milk - Bro pa - Cam d - Can f 1 - Can f 4 - Can f 6 - Can f_Fd1 - Can s - Can s 3 - Cap a - Cap h_epithelia - Cap h_milk - Car c - Car i - Car p - C…
Aca m - Asp f 4 - Asp f 6 - Can f 4 - Der p 20 - Equ c_meat - Fag s 1 - Ory_meat - Pha v - Pis v 4_RUO - Sco s - Sco s 1 - Tyr p 2,1
Aca s - Ach d - Ani s 3 - Ara h 6 - Arg r 1 - Asp f 4 - Bet v 2 - Blo t 10 - Blo t 5 - Bos d_meat - Chi spp. - Cra c 6 - Cry j 1 - Cuc m 2 - Cyn d - Cyn d 1 - Der f 2 - Der p 10 - Der p 2 - Der p 23 - Equ c_meat - Gly d 2 - Hev b 8 - Hom g - Jug r_pollen - Lep d 2 - Lit s - Loc m - Lol p 1 - Lol spp. - Mer a 1 - Myt e - Ost e - Pan b - Pas n - Pen m 1 - Per a 7 - Phl p 1 - Phl p 12 - Phl p 2 - Ph…
Aca s - Art v - Art v 1 - Bet v 1 - Can f 1 - Cor a 1.0103 - Cuc m 2 - Cyn d - Cyn d 1 - Der f 1 - Der f 2 - Der p 1 - Der p 2 - Der p 23 - Der p 7 - Fag s 1 - Fel d 1 - Fra a 1+3 - Fra e - Lep d 2 - Lol p 1 - Mala s 5 - Ole e 1 - Pas n - Phl p 1 - Phl p 12 - Phl p 5.0101 - Phl p 6 - Pho d 2 - Sec c_pollen - Tyr p,1
Alt a 1 - Amb a 4 - Art v - Art v 1 - Can f 1 - Can f_Fd1 - Cla h - Cla h 8 - Cor a 11 - Cuc m 2 - Cyn d - Cyn d 1 - Fel d 1 - Fel d 7 - Lol p 1 - Mes a 1_RUO - Pan m - Pap s - Phl p 1 - Phl p 12 - Phl p 2 - Phod s 1 - Sec c_pollen - Ses i 1,1
Alt a 1 - Amb a - Amb a 1 - Amb a 4 - Art v - Art v 1 - Bet v 2 - Cuc m 2 - Fel d 1 - Hev b 8 - Lol p 1 - Mer a 1 - Mes a 1_RUO - Phl p 1 - Phl p 12 - Pho d 2,1
Ach d - Alt a 1 - Amb a - Amb a 1 - Phl p 2 - Ten m,1
Act d 2 - Alt a 1 - Amb a 1 - Equ c 3 - Phl p 2,1
Alt a 1 - Amb a - Amb a 1 - Art v - Blo t 10 - Cry j 1 - Cup a 1 - Equ c 3 - Ory_meat - Phl p 2 - Sal s 1 - Ten m,1
Ama r - Amb a - Amb a 1 - Amb a 4 - Art v - Art v 1 - Lol p 1 - Phl p 1 - Rud spp. - Sac c - Sal k - Sal k 1 - Ses i 1 - Sin - Sol t,1
Alt a 1 - Amb a - Amb a 1 - Ani s 3 - Cam d - Cry j 1 - Cuc m 2 - Cup a 1 - Der f 1 - Der f 2 - Der p 1 - Der p 2 - Der p 23 - Fel d 1 - Mer a 1 - Mus m 1 - Phl p 12 - Phl p 2 - Pho d 2 - Rat n - Sus d 1 - Sus d_epithelia - Sus d_meat,1
All s - Alt a 1 - Alt a 6 - Amb a - Amb a 1 - Amb a 4 - Cic a - Cry j 1 - Len c - Ory s - Pap s - Phl p 2 - Pop n,1
Act d 1 - All s - Ana o - Ana o 2 - Ana o 3 - Ara h 1 - Ara h 3 - Ave s - Ber e - Bos d 4 - Bos d 5 - Bos d 6 - Bos d 8 - Bos d_milk - Cam d - Cap h_epithelia - Cap h_milk - Car i - Che q - Cic a - Cor a 11 - Cor a 9 - Cor a_pollen - Cuc p - Fag e - Fag e 2 - Gal d 2 - Gal d 3 - Gal d 5 - Gal d_meat - Gal d_white - Gal d_yolk - Gly m 5 - Gly m 6 - Hel a - Hor v - Jug r 1 - Jug r 4 - Len c - Lup a…
Aln g 1 - Alt a 1 - Amb a - Amb a 1 - Api g 1 - Bet v 1 - Bet v 2 - Can f_male urine - Cor a 1.0103 - Cor a 1.0401 - Cor a_pollen - Cuc m 2 - Cyn d 1 - Dau c - Dau c 1 - Fag s 1 - Hev b 8 - Jug r_pollen - Lol p 1 - Mer a 1 - Phl p 1 - Phl p 12 - Phl p 2 - Pho d 2,1
Alt a 1 - Cyn d - Cyn d 1 - Fel d 1 - Lol p 1 - Phl p 1 - Phl p 2,1
Aca s - Ach d - Alt a 1 - Ani s 3 - Ara h 6 - Blo t 10 - Chi spp. - Clu h - Cra c 6 - Der p 10 - Gal d_meat - Hom g - Lit s - Loc m - Lol spp. - Myt e - Ost e - Pan b - Pec spp. - Pen m 1 - Per a - Per a 7 - Rud spp. - Sol spp. - Ten m - Tyr p,1
Der f 2 - Der p 1 - Der p 2 - Der p 21 - Der p 23 - Der p 5 - Mala s 5,1
Alt a 1 - Art v 1 - Bet v 1 - Bet v 2 - Bla g 4 - Bla g 9 - Can f 1 - Can f 2 - Can f 4 - Can f 6 - Can f_male urine - Cav p 1 - Cor a 1.0103 - Cor a 1.0401 - Cuc m 2 - Cyn d - Cyn d 1 - Der p 20 - Equ c 1 - Equ c_milk - Fel d 1 - Fel d 7 - Fra a 1+3 - Fra e - Hev b 8 - Lol p 1 - Mer a 1 - Ole e 1 - Ory c 3 - Pas n - Phl p 1 - Phl p 12 - Phl p 2 - Phl p 5.0101 - Phl p 6 - Pho d 2 - Phr c - Sec c_…
Aln g 1 - Alt a 1 - Amb a - Amb a 1 - Amb a 4 - Art v - Art v 1 - Asp f 3 - Bet v 1 - Cor a 1.0103 - Cry j 1 - Fag s 1 - Fra a 1+3 - Phl p 2 - Phl p 5.0101 - Sec c_pollen - Sol spp.,1
Aln g 1 - Alt a 1 - Amb a - Amb a 1 - Api g 1 - Ara h 8 - Asp f 3 - Bet v 1 - Bla g 4 - Can f 1 - Can f 2 - Can f 3 - Can f 4 - Can f 6 - Can f_Fd1 - Can f_male urine - Cav p 1 - Cor a 1.0103 - Cor a 1.0401 - Cor a_pollen - Dau c - Dau c 1 - Equ c 1 - Equ c 3 - Equ c_meat - Equ c_milk - Fag s 1 - Fel d 1 - Fel d 2 - Fel d 4 - Fel d 7 - Fic c - Fra a 1+3 - Gal d 4 - Mal d 1 - Mes a 1_RUO - Ovi a_m…
Aln g 1 - Alt a 1 - Asp f 3 - Ave s - Bet v 1 - Cor a 1.0103 - Cyn d - Cyn d 1 - Der f 2 - Der p 2 - Der p 5 - Fag s 1 - Gal d 2 - Gal d 4 - Gal d_white - Jug r 3 - Lol p 1 - Phl p 1 - Phl p 2 - Pla a 3 - Pru p 3 - Sol t,1
Act d 1 - Alt a 1 - Bet v 1 - Cor a 1.0103 - Cyn d 1 - Der f 2 - Der p 1 - Der p 2 - Der p 5 - Fag s 1 - Gal d 4 - Lep d 2 - Lol p 1 - Phl p 1 - Phl p 2,1
Act d 2 - Alt a 1 - Api m - Api m 10 - Cyn d - Cyn d 1 - Fel d 1 - Phl p 1 - Phl p 2 - Phl p 5.0101 - Phl p 6 - Sec c_pollen,1
Alt a 1 - Can f 1 - Can f_Fd1 - Der p 23 - Equ c 1 - Fel d 1 - Fel d 4 - Fel d 7 - Gly d 2 - Lol p 1 - Phl p 1 - Phl p 2 - Phl p 5.0101 - Phl p 6 - Sec c_pollen,1
Alt a 1 - Cla h - Cla h 8 - Tri a 19,1
Ach d - Alt a 1 - Amb a 1 - Ara h 8 - Bet v 1 - Cor a 1.0401 - Cra c 6 - Cuc p - Der f 1 - Der f 2 - Der p 1 - Der p 2 - Der p 21 - Der p 5 - Der p 7 - Fag s 1 - Fel d 1 - Fra a 1+3 - Lep d 2 - Mala s 6 - Ses i - Ses i 1,1
Alt a 1 - Alt a 6 - Amb a - Amb a 1 - Bet v 1 - Can f_male urine - Cla h 8 - Cyn d - Cyn d 1 - Fag s 1 - Fel d 1 - Jug r_pollen - Lol p 1 - Pap s - Phl p 1 - Phl p 2 - Phl p 5.0101 - Phl p 6 - Sec c_pollen,1
Act d 2 - Act d 5 - Aln g 1 - Amb a 1 - Ana o - Ani s 1 - Ave s - Ber e - Bla g 2 - Bla g 4 - Bla g 5 - Blo t 10 - Blo t 21 - Cam d - Can f_male urine - Cap a - Car p - Cry j 1 - Cup a 1 - Der f 2 - Der p 2 - Der p 23 - Gad m - Gad m 1 - Gly m 5 - Mala s 6 - Pen m 3 - Rat n - Sus d 1 - Tri a 19 - Tyr p,1
Aln g 1 - Alt a 6 - Amb a - Amb a 1 - Amb a 4 - Api g 1 - Ara h 8 - Art v - Art v 1 - Bet v 1 - Can f 1 - Can f 2 - Can f 4 - Can f_Fd1 - Can f_male urine - Cor a 1.0103 - Cor a 1.0401 - Cor a_pollen - Cry j 1 - Cup a 1 - Dau c - Dau c 1 - Der f 2 - Der p 2 - Fag s 1 - Fel d 1 - Fel d 7 - Fra a 1+3 - Mal d 1,1
Ach d - Act d 2 - Alt a 1 - Alt a 6 - Amb a - Amb a 4 - Api m - Api m 10 - Art v - Art v 1 - Bet v 1 - Can f_Fd1 - Cla h 8 - Cor a 1.0103 - Cor a 1.0401 - Cor a_pollen - Cry j 1 - Cup a 1 - Fag s 1 - Fel d 1 - Fra a 1+3 - Loc m - Mal d 1 - Pla a 2 - Pol d 5 - Sec c_pollen - Ten m - Ves v - Ves v 5,1
Act d 10 - Act d 2 - Aln g 1 - Alt a 1 - Amb a - Amb a 1 - Api g 1 - Ara h 8 - Art v - Bet v 1 - Cor a 1.0103 - Cor a 1.0401 - Cor a_pollen - Cry j 1 - Cuc p - Cup a 1 - Cyn d - Cyn d 1 - Dau c - Dau c 1 - Der f 2 - Der p 2 - Fag s 1 - Fra a 1+3 - Lep d 2 - Lol p 1 - Mac inte - Mal d 1 - Mal d 3 - Par j 2 - Pas n - Phl p 1 - Phl p 2 - Pla a 3 - Sec c_pollen - Zea m 14,1
Aln g 1 - Alt a 1 - Alt a 6 - Amb a - Amb a 1 - Api g 1 - Art v - Art v 1 - Bet v 1 - Can f 1 - Cap a - Car i - Cav p 1 - Cor a 1.0103 - Cor a 1.0401 - Cor a_pollen - Cry j 1 - Dau c - Dau c 1 - Fag s 1 - Fel d 1 - Fel d 7 - Fra a 1+3 - Fra e - Fra e 1 - Jug r_pollen - Mal d 1 - Mala s 6 - Mus m 1 - Ole e 1 - Ory c 3 - Phl p 2 - Pis s - Rat n,1
Aln g 1 - Alt a 6 - Amb a - Amb a 1 - Amb a 4 - Api g 1 - Ara h 8 - Art v - Art v 1 - Asp f 3 - Bet v 1 - Blo t 5 - Bos d 5 - Bos d 6 - Bos d_meat - Can f 1 - Can f 2 - Can f 3 - Can f 4 - Can f 6 - Can f_Fd1 - Can f_male urine - Can s - Cap h_epithelia - Cav p 1 - Che a - Cic a - Clu h - Clu h 1 - Cor a 1.0103 - Cor a 1.0401 - Cor a 11 - Cor a 9 - Cor a_pollen - Cry j 1 - Cyn d - Cyp c 1 - Dau c…
Alt a 1 - Blo t 21 - Blo t 5 - Der p 21 - Lep d 2 - Pen m 3,1
Act d 2 - Alt a 1 - Amb a - Amb a 1 - Ara h 1 - Bla g 4 - Can f 1 - Can f 4 - Can f 6 - Can f_Fd1 - Cry j 1 - Cyn d 1 - Fel d 1 - Fel d 4 - Gly m 5 - Hev b 6.02 - Myt e - Ost e - Ves v 5,1
Aln g 1 - Alt a 1 - Amb a - Amb a 1 - Ara h 8 - Bet v 1 - Cor a 1.0103 - Cry j 1 - Cuc p - Cup a 1 - Cyn d - Cyn d 1 - Der f 2 - Der p 2 - Fag s 1 - Fel d 1 - Gly m 4 - Lol p 1 - Mus m 1 - Phl p 1 - Sal k 1,1
Aca s - Act d 2 - Aln g 1 - Alt a 1 - Amb a - Amb a 1 - Amb a 4 - Api g 1 - Ara h 8 - Art v - Art v 1 - Bet v 1 - Can f 1 - Can f 4 - Car p - Cor a 1.0103 - Cor a 1.0401 - Cor a_pollen - Cup a 1 - Dau c - Dau c 1 - Der f 1 - Der p 1 - Der p 23 - Der p 7 - Fag s 1 - Fel d 1 - Fra a 1+3 - Gly m 4 - Mal d 1 - Phl p 2 - Pol d - Pol d 5 - Tyr p,1
Alt a 1 - Amb a - Amb a 1 - Can f 1 - Can f_Fd1 - Equ c 1 - Fel d 1 - Fel d 4 - Fel d 7 - Mus m 1,1
Ach d - Aln g 1 - Api g 1 - Api m - Api m 1 - Api m 10 - Ara h 8 - Bet v 1 - Blo t 21 - Blo t 5 - Cla h 8 - Cor a 1.0103 - Cor a 1.0401 - Cor a_pollen - Cyn d - Cyn d 1 - Der f 2 - Der p 2 - Der p 21 - Der p 23 - Der p 5 - Der p 7 - Fag s 1 - Fra a 1+3 - Gly d 2 - Gly m 4 - Hev b 3 - Lep d 2 - Mal d 1 - Pol d 5 - Ten m - Ves v - Ves v 1,1
Ach d - Act d 2 - Alt a 1 - Ama r - Amb a - Amb a 1 - Amb a 4 - Art v - Art v 1 - Bla g 4 - Bla g 9 - Can f_Fd1 - Cry j 1 - Cup a 1 - Cyn d - Cyn d 1 - Der f 2 - Der p 2 - Der p 20 - Fel d 1 - Gly d 2 - Hev b 6.02 - Lep d 2 - Loc m - Phl p 1 - Pol d 5 - Sal k - Sal k 1 - Ses i 1 - Ten m,1
Act d 2 - Aln g 1 - Alt a 1 - Ama r - Amb a - Amb a 1 - Ana o - Ana o 3 - Ara h 9 - Ber e - Bet v 1 - Bet v 2 - Can f 1 - Can f 4 - Can f_male urine - Cor a 1.0103 - Cor a 1.0401 - Cor a_pollen - Cry j 1 - Cuc m 2 - Cup a 1 - Fag s 1 - Fel d 1 - Fel d 7 - Fra a 1+3 - Hev b 8 - Jug r_pollen - Mal d 1 - Mer a 1 - Par j 2 - Phl p 12 - Pho d 2 - Pyr c - Raj c - Sal k,1
All s - Alt a 1 - Amb a - Amb a 1 - Bet v 1 - Can f 1 - Der p 23 - Fag s 1 - Fel d 7 - Hev b 1 - Hev b 3 - Phl p 2,1
Act d 2 - All c - Aln g 1 - Alt a 1 - Amb a - Amb a 1 - Ani s 3 - Ara h 1 - Bla g 4 - Bla g 5 - Blo t 10 - Can f 6 - Car p - Cla h 8 - Cry j 1 - Der p 10 - Equ c 1 - Equ c 3 - Fag s 1 - Fel d 4 - Gly m 5 - Hev b 11 - Mala s 6 - Pen m 1 - Per a 7 - Rat n - Sol spp. - Tri a 19,1
Alt a 1 - Art v - Art v 1 - Bet v 1 - Fag s 1 - Fel d 1 - Phl p 2 - Ves v 1,1
Aln g 1 - Alt a 1 - Amb a - Amb a 1 - Amb a 4 - Api g 1 - Art v - Art v 1 - Art v 3 - Bet v 1 - Can f 6 - Can f_Fd1 - Can s 3 - Cor a 1.0103 - Cor a 1.0401 - Cor a_pollen - Cry j 1 - Cuc m 2 - Cyn d - Cyn d 1 - Dau c - Dau c 1 - Der f 2 - Der p 2 - Equ c 1 - Fag s 1 - Fel d 1 - Fra a 1+3 - Jug r 3 - Lep d 2 - Lol p 1 - Mal d 1 - Mal d 3 - Ory_meat - Phl p 1 - Phl p 12 - Phl p 2 - Pho d 2 - Vit v …
Act d 2 - Alt a 1 - Ber e - Can f_Fd1 - Fel d 1 - Ses i 1,1
Ach d - Act d 2 - Alt a 1 - Art v - Art v 1 - Can f 2 - Can f 4 - Can f 6 - Can f_Fd1 - Cor a 14 - Fel d 1 - Jug r 1 - Jug r 2 - Jug r 4 - Jug r 6,1
Aca s - Act d 2 - Alt a 1 - Amb a - Amb a 1 - Amb a 4 - Api m - Api m 1 - Art v - Art v 1 - Bla g 4 - Blo t 5 - Can f_Fd1 - Car p - Chi spp. - Cuc m 2 - Cyn d - Cyn d 1 - Der f 1 - Der f 2 - Der p 1 - Der p 2 - Der p 21 - Der p 23 - Der p 5 - Der p 7 - Fel d 1 - Gly d 2 - Hev b 6.02 - Hom g - Jug r_pollen - Lep d 2 - Lol p 1 - Lol spp. - Mus m 1 - Ost e - Pan b - Par j 2 - Pec spp. - Pen m 2 - Pe…
Api m 10 - Bet v 1 - Can f 4 - Der p 23 - Hev b 3 - Mala s 5 - Phl p 1,1
Alt a 6 - Cla h 8,1
Act d 2 - Aln g 1 - Ama r - Api g 1 - Ara h 1 - Ara h 8 - Art v - Art v 1 - Ber e - Bet v 1 - Bet v 2 - Bla g 1 - Bla g 4 - Car p - Cor a 1.0103 - Cor a 1.0401 - Cuc m 2 - Dau c - Dau c 1 - Der p 23 - Fag e - Fag s 1 - Fel d 1 - Fra a 1+3 - Hev b 8 - Jug r_pollen - Lup a - Mal d 1 - Mala s 6 - Mer a 1 - Pas n - Phl p 12 - Pho d 2 - Pop n - Pyr c - Sal k - Sal k 1 - Ses i 1 - Ten m - Urt d,1
Alt a 1 - Bet v 1 - Cor a 1.0103 - Der f 1 - Der f 2 - Der p 1 - Der p 2 - Der p 21 - Der p 23 - Fag s 1,1
Aca m - Aca s - Ama r - Amb a 1 - Ana o - Asp f 6 - Bla g 1 - Bla g 2 - Bla g 4 - Bla g 9 - Can f 1 - Can f 2 - Can f 6 - Can f_Fd1 - Cav p 1 - Che q - Cic a - Der p 7 - Equ c 1 - Fag s 1 - Fel d 1 - Fel d 4 - Fel d 7 - Gal d_white - Hel a - Mala s 11 - Mes a 1_RUO - Ory c 3 - Par j 2 - Pen ch - Pho d 2 - Pol d - Pol d 5 - Pru p 3 - Sac c - Sin - Sin a 1,1
Alt a 1 - Can f_Fd1 - Fel d 1 - Mes a 1_RUO,1
Aln g 1 - Amb a 1 - Ara h 8 - Bet v 1 - Can f 1 - Can f_male urine - Cor a 1.0103 - Cor a 1.0401 - Cor a_pollen - Fag s 1 - Fel d 1 - Fel d 7 - Fra a 1+3 - Gly m 4 - Hel a - Lol spp. - Mal d 1 - Mala s 5 - Myt e - Ory c 3 - Vac m,1
Bla g 4 - Der p 7 - Mala s 5 - Pen ch - Pru p 3 - Sac c,1
Act d 2 - Aln g 1 - Alt a 1 - Alt a 6 - Amb a - Amb a 1 - Api g 1 - Asp f 3 - Bet v 1 - Bet v 2 - Can f 1 - Cla h 8 - Cor a 1.0103 - Cor a 1.0401 - Cry j 1 - Cuc m 2 - Cup a 1 - Cyn d - Cyn d 1 - Dau c - Dau c 1 - Der f 1 - Equ c 1 - Fag s 1 - Fel d 1 - Fel d 4 - Fel d 7 - Fra a 1+3 - Hev b 11 - Hev b 8 - Jug r_pollen - Lol p 1 - Mal d 1 - Mer a 1 - Ory c 3 - Pas n - Pen m 2 - Phl p 1 - Phl p 2 -…
Aln g 1 - Alt a 1 - Ama r - Amb a - Amb a 1 - Amb a 4 - Art v 1 - Bet v 1 - Can f_male urine - Cor a 1.0103 - Cor a 1.0401 - Cor a_pollen - Cry j 1 - Cyn d - Cyn d 1 - Fag s 1 - Lol p 1 - Mal d 1 - Pas n - Phl p 1 - Phl p 2 - Phl p 5.0101 - Phl p 6 - Sal k 1 - Sec c_pollen,1
Aca s - Act d 10 - Amb a - Amb a 1 - Asp f 6 - Bla g 9 - Blo t 5 - Cry j 1 - Cyn d - Cyn d 1 - Der f 1 - Der f 2 - Der p 1 - Der p 2 - Der p 20 - Der p 21 - Der p 23 - Der p 5 - Der p 7 - Fag s 1 - Fel d 1 - Gly d 2 - Mala s 11 - Pen m 2 - Tyr p - Tyr p 2 - Zea m 14,1
Alt a 1 - Amb a - Amb a 1 - Cla h 8 - Cry j 1 - Lol p 1 - Ost e - Phl p 1 - Phl p 5.0101 - Ves v - Ves v 1 - Ves v 5,1
Alt a 1 - Amb a - Amb a 1 - Amb a 4 - Art v - Art v 1 - Cry j 1 - Der f 2 - Der p 2 - Fel d 1 - Phl p 5.0101 - Phl p 6 - Sec c_pollen,1
Act d 2 - All s - Alt a 1 - Ama r - Amb a - Amb a 1 - Ber e - Bet v 1 - Bla g 2 - Bla g 4 - Bla g 5 - Car p - Equ c 3 - Fag s 1 - Fel d 1 - Fra a 1+3 - Gly m 5 - Ory c 2 - Phl p 5.0101 - Phl p 6 - Pop n - Pru av - Sal k - Sal k 1 - Sec c_pollen,1
Aln g 1 - Alt a 1 - Ama r - Amb a - Amb a 1 - Amb a 4 - Api g 1 - Ara h 8 - Art v - Art v 1 - Bet v 1 - Can f 1 - Can f_male urine - Cor a 1.0103 - Cor a 1.0401 - Cyn d - Cyn d 1 - Dau c 1 - Fag s 1 - Fel d 7 - Fra a 1+3 - Gly m 4 - Lol p 1 - Mal d 1 - Ory c 3 - Phl p 1 - Sal k 1,1
Ach d - Act d 2 - Aln g 1 - Alt a 1 - Bet v 1 - Can f_Fd1 - Cor a 1.0103 - Cor a 1.0401 - Cyn d - Cyn d 1 - Der p 23 - Fag s 1 - Fel d 1 - Gly m 5 - Loc m - Lol p 1 - Lup a - Mal d 1 - Pas n - Phl p 1 - Ten m,1
Ach d - Aln g 1 - Alt a 1 - Amb a - Amb a 1 - Ani s 3 - Ara h 8 - Art v - Art v 1 - Asp f 3 - Bet v 1 - Bla g 2 - Bla g 4 - Blo t 10 - Chi spp. - Cla h - Cla h 8 - Cor a 1.0103 - Cor a 1.0401 - Cry j 1 - Cyn d - Cyn d 1 - Der p 1 - Der p 10 - Fag s 1 - Fra a 1+3 - Gly m 4 - Loc m - Lol p 1 - Mal d 1 - Pen m 1 - Per a 7 - Phl p 1 - Phr c - Sac c - Ten m,1
Act d 10 - Act d 2 - Alt a 1 - Amb a - Amb a 1 - Amb a 4 - Ara h 9 - Art v 1 - Bla g 4 - Can f 1 - Can f 6 - Can f_male urine - Cry j 1 - Fel d 4 - Fel d 7 - Fra a 1+3 - Mal d 3 - Raj c - Zea m - Zea m 14,1
Der p 23 - Fel d 1 - Mala s 6,1
Act d 2 - Aln g 1 - Alt a 1 - Amb a - Amb a 1 - Api g 1 - Asp f 3 - Bet v 1 - Blo t 10 - Cic a - Cor a 1.0103 - Cor a 1.0401 - Cor a_pollen - Cry j 1 - Cuc m 2 - Dau c 1 - Der p 10 - Fag s 1 - Fel d 1 - Fra a 1+3 - Hom g - Mal d 1 - Ost e - Pen m 1 - Per a 7 - Phl p 2 - Pho d 2 - Raj c - Ten m - Ves v 5,1
Act d 2 - Aln g 1 - Alt a 1 - Amb a - Amb a 1 - Ara h 8 - Asp f 3 - Bet v 1 - Cor a 1.0103 - Cor a 1.0401 - Cor a_pollen - Cry j 1 - Fag s 1 - Gly m 4 - Lol p 1 - Pas n - Phl p 1 - Phl p 2 - Ves v - Ves v 1,1
Can f 1 - Can f 4 - Can f 6 - Can f_Fd1 - Can f_male urine - Cla h - Cla h 8 - Equ c 1 - Fel d 1 - Fel d 4 - Fel d 7 - Mus m 1,1
Alt a 1 - Amb a - Amb a 1 - Amb a 4 - Api m 1 - Art v - Art v 1 - Cry j 1 - Ves v 5,1
Alt a 1 - Can f 1 - Can f 4 - Der f 1 - Der f 2 - Der p 1 - Der p 2 - Der p 21 - Der p 5 - Lep d 2,1
Alt a 1 - Amb a - Amb a 1 - Can f 1 - Clu h - Clu h 1 - Cry j 1 - Cyp c 1 - Der f 1 - Der f 2 - Der p 1 - Der p 2 - Fel d 1 - Fel d 7 - Gad m - Gad m 1 - Lep d 2 - Lol p 1 - Pas n - Pha v - Phl p 1 - Phl p 2 - Phl p 7 - Sal s - Sal s 1 - Sco s - Sco s 1 - Sec c_flour - Thu a 1 - Xip g 1,1
Aca m - All s - Aln g 1 - Alt a 1 - Amb a - Amb a 1 - Api g 1 - Ara h 8 - Art v - Art v 1 - Bet v 1 - Bet v 2 - Cor a 1.0103 - Cor a 1.0401 - Cor a_pollen - Cry j 1 - Cuc m 2 - Cyn d - Dau c - Dau c 1 - Der p 2 - Fag s 1 - Fel d 1 - Fra a 1+3 - Hev b 8 - Jug r_pollen - Mal d 1 - Mer a 1 - Pas n - Phl p 12 - Phl p 2 - Pho d 2 - Pim a - Pop n - Sal k - Sec c_pollen,1
Aca s - Aln g 1 - Alt a 1 - Amb a - Amb a 1 - Api g 1 - Ara h 8 - Bet v 1 - Can f 1 - Can f 6 - Can f_Fd1 - Cor a 1.0103 - Cor a 1.0401 - Cor a_pollen - Cry j 1 - Cup a 1 - Der f 1 - Der f 2 - Der p 1 - Der p 2 - Der p 23 - Der p 7 - Equ c 1 - Fag s 1 - Fel d 1 - Fel d 4 - Fel d 7 - Gly d 2 - Hom s LF - Lep d 2 - Mus m 1 - Ory c 1 - Ory c 2 - Ory c 3 - Phl p 2 - Pla a 2 - Rat n - Sal k - Sec c_po…
Alt a 1 - Ara h 8 - Bet v 1 - Can f 1 - Can f 6 - Cor a 1.0103 - Cor a 1.0401 - Cor a_pollen - Dau c - Dau c 1 - Equ c 1 - Fag s 1 - Fel d 1 - Fel d 4 - Fel d 7 - Fra a 1+3 - Mal d 1 - Mus m 1 - Phl p 2 - Pol d 5 - Sec c_flour - Ves v 5,1
Aln g 1 - Alt a 1 - Alt a 6 - Amb a - Amb a 1 - Asp f 3 - Asp f 6 - Bet v 1 - Can f_Fd1 - Cla h 8 - Cor a 1.0103 - Cor a 1.0401 - Cor a_pollen - Cry j 1 - Cyn d - Cyn d 1 - Equ c 1 - Fag s 1 - Fel d 1 - Fel d 4 - Fra a 1+3 - Gly m 4 - Lol p 1 - Mal d 1 - Mus m 1 - Pas n - Phl p 1 - Phl p 2,1
All s - Alt a 1 - Amb a - Amb a 1 - Can f_Fd1 - Cav p 1 - Cla h - Cla h 8 - Cyn d - Cyn d 1 - Fel d 1 - Lol p 1 - Par j 2 - Phl p 1 - Phl p 2 - Ses i 1,1
Art v - Art v 1 - Art v 3 - Asp f 4 - Can f 1 - Can f 2 - Can f 3 - Can f 4 - Can f 6 - Can f_Fd1 - Cav p 1 - Clu h 1 - Cor a 8 - Der p 5 - Equ c 1 - Fel d 1 - Fel d 4 - Fel d 7 - Hev b 1 - Hev b 3 - Lol p 1 - Mes a 1_RUO - Phl p 1 - Xip g 1,1
Aca s - Ach d - Act d 10 - All s - Alt a 1 - Amb a - Amb a 1 - Ani s 3 - Api g 2 - Api g 6 - Ara h 15 - Ara h 6 - Ara h 9 - Arg r 1 - Art v - Art v 1 - Art v 3 - Asp f 3 - Asp f 4 - Asp f 6 - Ave s - Ber e 1 - Blo t 10 - Bos d 4 - Can f 2 - Can s - Can s 3 - Cap a - Chi spp. - Cic a - Cla h - Cla h 8 - Cor a 12_RUO - Cor a 8 - Cry j 1 - Cuc p - Cyp c 1 - Der p 10 - Der p 23 - Der p 5 - Equ c 3 - …
Alt a 1 - Amb a - Amb a 1 - Amb a 4 - Can f_male urine - Cry j 1 - Cup a 1 - Raj c - Ves v - Ves v 5,1
Alt a 1 - Alt a 6 - Amb a 1 - Bet v 1 - Cry j 1 - Cyn d - Cyn d 1 - Fel d 1 - Lol p 1 - Pas n - Phl p 1 - Phl p 2 - Phl p 5.0101 - Phl p 6 - Sec c_pollen,1
Amb a - Amb a 1 - Art v 1 - Cla h 8 - Fel d 1 - Phod s 1,1
Alt a 1 - Mala s 6,1
Amb a 1 - Cav p 1 - Cla h 8 - Fel d 1 - Fel d 7,1
Aca m - Ail a - All s - Alt a 1 - Amb a - Amb a 1 - Amb a 4 - Ara h 1 - Art v - Ave s - Ber e - Bet v 1 - Bet v 2 - Cap a - Car c - Car i - Che q - Cic a - Cor a 1.0103 - Cor a 11 - Cor a 9 - Cry j 1 - Cuc m 2 - Cuc p - Cup a 1 - Cyn d - Cyn d 1 - Fag e - Fag s 1 - Fel d 1 - Fic c - Gal d 5 - Gal d_white - Gal d_yolk - Hel a - Hev b 8 - Hom s LF - Jug r 2 - Jug r 4 - Jug r 6 - Jug r_pollen - Lol …
Alt a 1 - Amb a - Amb a 1 - Bet v 1 - Can f_Fd1 - Cor a 1.0103 - Cry j 1 - Cyn d - Cyn d 1 - Fag s 1 - Fel d 1 - Lol p 1 - Mal d 1 - Phl p 1 - Phl p 2 - Ves v 5,1
Act d 10 - Act d 2 - Aln g 1 - Alt a 1 - Api g 2 - Api g 6 - Ara h 9 - Art v - Art v 1 - Art v 3 - Bet v 1 - Bla g 5 - Can f 6 - Can s - Can s 3 - Cap a - Cor a 1.0103 - Cor a 1.0401 - Cor a 8 - Cor a_pollen - Cry j 1 - Cup a 1 - Fag s 1 - Fic b - Fra a 1+3 - Fra e - Fra e 1 - Jug r 3 - Lup a - Mal d 1 - Mal d 3 - Myt e - Ole e 1 - Pla a 3 - Pru p 3 - Vit v 1 - Zea m - Zea m 14,1
Alt a 1 - Can f_male urine - Equ c 1 - Fel d 1 - Phl p 1 - Sus d 1,1
Alt a 1 - Amb a - Amb a 1 - Bet v 1 - Bos d 6 - Can f 1 - Can f 2 - Can f 3 - Can f 6 - Can f_male urine - Cap h_epithelia - Cry j 1 - Cyn d - Cyn d 1 - Equ c 1 - Equ c 3 - Equ c_meat - Fag s 1 - Fel d 1 - Fel d 2 - Fel d 4 - Fel d 7 - Gly d 2 - Jug r_pollen - Lol p 1 - Ory c 3 - Ory_meat - Pas n - Phl p 1 - Phl p 2 - Phl p 5.0101 - Phl p 6 - Sec c_pollen - Sus d 1 - Sus d_epithelia,1
Aca m - Alt a 1 - Ama r - Amb a - Amb a 1 - Bet v 2 - Cry j 1 - Cuc m 2 - Cup a 1 - Cyn d - Cyn d 1 - Der f 2 - Der p 2 - Fel d 1 - Hev b 8 - Jug r 2 - Jug r_pollen - Lep d 2 - Lol p 1 - Mer a 1 - Pas n - Phl p 1 - Phl p 12 - Phl p 2 - Phl p 5.0101 - Phl p 6 - Pho d 2 - Phr c - Pla a 2 - Pop n - Raj c - Sal k - Sec c_pollen - Ses i - Ulm c,1
Alt a 1 - Alt a 6 - Amb a 1 - Asp f 3 - Bet v 1 - Cor a 1.0103 - Fag s 1 - Fra a 1+3 - Lol p 1 - Mala s 6 - Par j 2 - Phl p 1 - Phl p 2,1
Ach d - Act d 2 - All s - Alt a 1 - Amb a - Amb a 1 - Bet v 1 - Bla g 4 - Can f_Fd1 - Car i - Cla h 8 - Cor a 1.0401 - Cry j 1 - Cup a 1 - Fag s 1 - Fel d 1 - Fic b - Fic c - Fra a 1+3 - Hel a - Hom s LF - Mal d 1 - Mala s 6 - Par j 2 - Phl p 2 - Pla a 2 - Ten m,1
Alt a 1 - Ama r - Amb a - Amb a 1 - Bet v 1 - Bet v 2 - Cuc m 2 - Cyn d - Cyn d 1 - Fag s 1 - Hev b 8 - Jug r_pollen - Lol p 1 - Mer a 1 - Ost e - Pas n - Phl p 1 - Phl p 12 - Phl p 2 - Pho d 2 - Phr c - Sal k - Sal k 1 - Sec c_flour - Sec c_pollen,1
Alt a 1 - Bet v 1 - Phl p 2 - Sec c_flour,1
Alt a 1 - Myt e - Ost e,1
Act d 2 - Alt a 1 - Amb a - Amb a 1 - Amb a 4 - Api g 1 - Art v - Art v 1 - Bet v 1 - Can f_Fd1 - Can f_male urine - Cla h 8 - Cry j 1 - Cup a 1 - Der f 1 - Der f 2 - Der p 1 - Der p 2 - Der p 23 - Der p 5 - Der p 7 - Equ c 3 - Fel d 1 - Gly d 2 - Lep d 2 - Phl p 2,1
Aln g 1 - Alt a 1 - Amb a - Amb a 1 - Api g 1 - Art v - Art v 1 - Bet v 1 - Cor a 1.0103 - Cor a 1.0401 - Cor a_pollen - Dau c - Dau c 1 - Fag s 1 - Fra a 1+3 - Gly m 4 - Mal d 1 - Phl p 5.0101 - Pop n - Sal k - Sec c_pollen,1
Can f 1 - Can f_Fd1 - Fel d 1 - Fel d 2 - Fel d 7 - Lol p 1 - Mala s 5 - Phl p 1,1
Aca s - Ach d - Alt a 1 - Amb a - Amb a 1 - Ani s 3 - Ara h 1 - Ara h 6 - Blo t 10 - Blo t 21 - Cam d - Can f 1 - Can f 4 - Can f 6 - Can f_male urine - Cap h_epithelia - Cav p 1 - Chi spp. - Cla h - Cyn d - Cyn d 1 - Der f 1 - Der f 2 - Der p 1 - Der p 10 - Der p 2 - Der p 23 - Der p 7 - Equ c 4 - Fel d 1 - Fel d 2 - Fel d 7 - Gad m 1 - Gal d 1 - Gly d 2 - Gly m 6 - Hev b 8 - Hom g - Jug r 1 - L…
Alt a 1 - Der f 1 - Der f 2 - Der p 1 - Der p 2 - Der p 21 - Der p 5 - Lep d 2 - Pop n,1
Amb a - Amb a 1 - Ana o - Art v - Art v 3 - Bet v 2 - Can f 1 - Can f 3 - Can f 6 - Can f_Fd1 - Cap h_epithelia - Cry j 1 - Cuc m 2 - Equ c 1 - Equ c 3 - Equ c_meat - Fel d 1 - Fel d 2 - Fel d 4 - Fel d 7 - Hev b 8 - Jug r_pollen - Lol p 1 - Mala s 11 - Mer a 1 - Ory c 3 - Ory_meat - Phl p 1 - Phl p 12 - Pho d 2 - Rat n - Sus d 1,1
Act d 2 - Alt a 1 - Art v - Art v 1 - Bla g 4 - Cyn d - Cyn d 1 - Lol p 1 - Phl p 1 - Phl p 2 - Pru p 3,1
Alt a 1 - Amb a - Amb a 4 - Art v - Art v 1 - Bet v 1 - Cor a 1.0401 - Cuc m 2 - Fag s 1 - Fra a 1+3 - Jug r_pollen - Mal d 1 - Mala s 6 - Phl p 12 - Phl p 5.0101 - Phl p 6 - Phr c - Sec c_pollen,1
Alt a 1 - Api m 10 - Bet v 1 - Can f 1 - Can f 4 - Can f 6 - Can f_Fd1 - Equ c 1 - Fel d 1 - Fel d 4 - Mes a 1_RUO - Ves v,1
Alt a 1 - Der f 1 - Der f 2 - Der p 1 - Der p 2 - Der p 21 - Der p 23 - Der p 5 - Fel d 1 - Gly d 2 - Lep d 2 - Tyr p,1
Aln g 1 - Amb a - Amb a 1 - Api g 1 - Asp f 3 - Bet v 1 - Bla g 4 - Can f_Fd1 - Car i - Cla h 8 - Cor a 1.0103 - Cor a 1.0401 - Cor a_pollen - Cry j 1 - Cup a 1 - Fag s 1 - Fel d 1 - Jug r 2 - Mal d 1 - Mala s 6 - Par j 2 - Sal k,1
Act d 2 - Alt a 1 - Api m - Api m 10 - Bos d 6 - Can f 1 - Can f 2 - Can f 3 - Can f 4 - Can f 6 - Can f_Fd1 - Equ c 1 - Fel d 1 - Fel d 2 - Fel d 4 - Fel d 7 - Ory c 3 - Ovi a_meat - Rat n - Sus d 1 - Sus d_epithelia,1
Alt a 1 - Ama r - Amb a - Amb a 1 - Bet v 1 - Bet v 2 - Can f 6 - Cuc m 2 - Cyn d - Cyn d 1 - Der p 23 - Equ c 1 - Fag s 1 - Fel d 1 - Hev b 8 - Jug r_pollen - Lol p 1 - Mer a 1 - Mes a 1_RUO - Mus m 1 - Pas n - Phl p 1 - Phl p 12 - Phl p 2 - Phl p 5.0101 - Pho d 2 - Phod s 1 - Sec c_pollen - Ves v 5,1
Alt a 1 - Amb a - Amb a 1 - Bet v 1 - Can f 1 - Can f 4 - Can f 6 - Can f_Fd1 - Can f_male urine - Cry j 1 - Cyn d - Cyn d 1 - Der p 7 - Equ c 1 - Equ c 3 - Fel d 1 - Fel d 4 - Fel d 7 - Phl p 1 - Phl p 2,1
Act d 10 - Alt a 1 - Amb a - Amb a 1 - Api g 2 - Api g 6 - Ara h 9 - Art v - Art v 3 - Bet v 2 - Can s - Can s 3 - Cap a - Cor a 8 - Cuc m 2 - Fra a 1+3 - Hel a - Hev b 8 - Jug r 3 - Lol p 1 - Mal d 3 - Phl p 1 - Phl p 12 - Pho d 2 - Pla a 3 - Pru av - Pru p 3 - Pyr c - Raj c - Tri a 14 - Vit v 1 - Zea m - Zea m 14,1
Alt a 1 - Alt a 6 - Amb a - Amb a 1 - Bla g 4 - Can f 4 - Cla h - Cla h 8 - Cry j 1 - Fel d 1 - Mala s 6 - Phl p 2 - Ses i 1,1
Ach d - All s - Alt a 1 - Can f 1 - Can f 6 - Cla h - Cla h 8 - Cyn d - Cyn d 1 - Loc m - Lol p 1 - Phl p 1 - Phl p 2,1
Alt a 1 - Amb a - Amb a 1 - Art v - Art v 1 - Can f 4 - Can f_Fd1 - Can f_male urine - Cry j 1 - Cyn d - Cyn d 1 - Cyp c 1 - Fel d 1 - Mala s 6 - Phl p 1 - Phl p 5.0101 - Sec c_pollen - Thu a 1,1
Aln g 1 - Alt a 6 - Bet v 1 - Can f_male urine - Che a 1 - Cor a 1.0103 - Cor a 1.0401 - Cor a_pollen - Equ c 1 - Fag s 1 - Fel d 1 - Mal d 1 - Myt e,1
Act d 2 - Aln g 1 - Amb a - Amb a 1 - Amb a 4 - Api g 1 - Ara h 8 - Art v - Bet v 1 - Bet v 2 - Cor a 1.0103 - Cor a 1.0401 - Cor a_pollen - Cuc m 2 - Cup a 1 - Dau c 1 - Der f 2 - Der p 2 - Der p 7 - Fag s 1 - Fel d 1 - Fra a 1+3 - Gly m 4 - Hev b 8 - Jug r_pollen - Lep d 2 - Mal d 1 - Mala s 6 - Mer a 1 - Mes a 1_RUO - Pen m 2 - Per a - Phl p 12 - Pho d 2 - Thu a - Urt d - Vac m - Ves v - Ves v…
Alt a 1 - Bet v 1 - Cav p 1 - Fel d 1,1
Alt a 1 - Amb a - Amb a 1 - Bet v 2 - Cry j 1 - Cuc m 2 - Cup a 1 - Hev b 8 - Jug r_pollen - Lol p 1 - Mer a 1 - Phl p 1 - Phl p 12 - Pho d 2,1
Aln g 1 - Alt a 1 - Amb a - Amb a 1 - Bet v 1 - Can f 1 - Can f 4 - Can f 6 - Can f_Fd1 - Can f_male urine - Cav p 1 - Cry j 1 - Der f 1 - Equ c 1 - Fag s 1 - Fel d 4 - Fel d 7 - Mus m 1,1
Ara h 1 - Asp f 1 - Myt e - Ost e,1
Alt a 1 - Cyn d 1 - Der f 1 - Der f 2 - Der p 1 - Der p 2 - Der p 5 - Fel d 1 - Lep d 2 - Mes a 1_RUO,1
Alt a 1 - Amb a - Amb a 1 - Bet v 2 - Can f 6 - Cry j 1 - Cuc m 2 - Cup a 1 - Der f 2 - Der p 2 - Equ c 1 - Fel d 1 - Fel d 4 - Fel d 7 - Hev b 8 - Jug r_pollen - Lep d 2 - Mer a 1 - Phl p 12 - Phl p 5.0101 - Phl p 6 - Pho d 2,1
Aln g 1 - Amb a - Amb a 1 - Api g 1 - Ara h 8 - Asp f 6 - Bet v 1 - Bla g 9 - Can f_Fd1 - Clu h 1 - Cor a 1.0103 - Cor a 1.0401 - Cor a_pollen - Cyn d - Cyn d 1 - Der f 2 - Der p 2 - Der p 20 - Fag s 1 - Fel d 1 - Gly m 4 - Lep d 2 - Lol p 1 - Mal d 1 - Mala s 11 - Myt e - Pen m 2 - Phl p 1 - Ves v - Ves v 5,1
Aln g 1 - Alt a 1 - Amb a - Amb a 1 - Amb a 4 - Api g 1 - Api m - Api m 10 - Ara h 8 - Art v - Art v 1 - Bet v 1 - Can f_male urine - Cor a 1.0103 - Cor a 1.0401 - Cor a_pollen - Cyn d - Cyn d 1 - Dau c - Dau c 1 - Der f 2 - Der p 1 - Der p 2 - Der p 23 - Der p 7 - Fag s 1 - Fel d 1 - Fra a 1+3 - Gly m 4 - Lep d 2 - Lol p 1 - Mac inte - Mal d 1 - Mus m 1 - Phl p 1 - Phl p 5.0101 - Sec c_pollen,1
Alt a 1 - Amb a - Amb a 1 - Amb a 4 - Ara h 1 - Can f_male urine,1
Alt a 1 - Can f 1 - Clu h 1 - Cuc m 2 - Cyn d - Cyn d 1 - Der f 2 - Der p 2 - Fel d 1 - Fel d 7 - Lol p 1 - Mus m 1 - Phl p 1 - Phl p 12 - Phl p 5.0101 - Phl p 6 - Pho d 2 - Sec c_pollen - Ves v 5,1
Api m - Api m 1 - Api m 10 - Fag e - Lup a - Mala s 5 - Pha v - Pop n - Tri a 19 - Ves v 5,1
Alt a 1 - Can f_male urine - Vac m,1
Alt a 1 - Clu h 1 - Phl p 2 - Phl p 5.0101 - Sal s 1 - Sco s 1 - Thu a 1,1
Alt a 1 - Amb a - Amb a 1 - Bet v 2 - Cuc m 2 - Cyn d - Cyn d 1 - Hev b 8 - Jug r_pollen - Lol p 1 - Mer a 1 - Pas n - Phl p 1 - Phl p 12 - Phl p 2 - Phl p 5.0101 - Phl p 6 - Pho d 2 - Phr c - Pla l - Sec c_pollen,1
Aca s - Ach d - Alt a 1 - Amb a - Amb a 1 - Ani s 3 - Ara h 15 - Ara h 2 - Ara h 6 - Arg r 1 - Art v 1 - Asp f 3 - Asp f 4 - Ber e 1 - Bet v 6 - Blo t 10 - Blo t 5 - Bos d 4 - Can f 2 - Can f 6 - Chi spp. - Cla h - Cor a 12_RUO - Cyp c 1 - Der f 2 - Der p 10 - Der p 2 - Der p 23 - Der p 5 - Dol spp - Equ c 3 - Fel d 2 - Fel d 4 - Gad m 1 - Gal d 1 - Gal d 5 - Gly d 2 - Gly m 4 - Gly m 8 - Hom g -…
Alt a 1 - Phl p 1 - Phl p 5.0101 - Phl p 6 - Sec c_pollen,1
Alt a 1 - Bet v 1 - Bet v 2 - Can f 1 - Can f_Fd1 - Cuc m 2 - Cyn d - Cyn d 1 - Der f 2 - Fel d 1 - Fel d 7 - Hev b 8 - Jug r_pollen - Lol p 1 - Mer a 1 - Mes a 1_RUO - Pas n - Phl p 1 - Phl p 12 - Phl p 2 - Phl p 5.0101 - Phl p 6 - Pho d 2 - Phr c - Sec c_pollen,1
Aln g 1 - Alt a 1 - Api g 1 - Ara h 8 - Bet v 1 - Bet v 2 - Can f_Fd1 - Cor a 1.0103 - Cor a 1.0401 - Cor a_pollen - Cuc m 2 - Cyn d - Cyn d 1 - Dau c - Dau c 1 - Fag s 1 - Fel d 1 - Fra a 1+3 - Gly m 4 - Hev b 8 - Jug r_pollen - Lol p 1 - Mal d 1 - Mer a 1 - Mes a 1_RUO - Pas n - Phl p 1 - Phl p 12 - Pho d 2,1
Der p 23 - Mala s 6,1
Aln g 1 - Bla g 4 - Bos d_meat - Equ c_meat - Gly m 5 - Mala s 6 - Ovi a_meat,1
Alt a 1 - Bet v 1 - Cyn d 1 - Der p 23 - Fag s 1 - Fel d 1 - Lol p 1 - Phl p 1 - Phl p 2,1
Act d 2 - All s - Alt a 1 - Amb a - Amb a 4 - Ana o - Ana o 2 - Ana o 3 - Ara h 1 - Ara h 2 - Ara h 3 - Ara h 6 - Art v - Art v 1 - Ave s - Ber e - Bet v 1 - Can f 1 - Can f 3 - Can f 6 - Can f_Fd1 - Cap a - Car c - Car i - Che q - Cic a - Cor a 11 - Cor a 14 - Cor a 9 - Cor a_pollen - Cuc m 2 - Cuc p - Cyn d - Cyn d 1 - Der f 1 - Der p 1 - Der p 23 - Equ c 1 - Equ c 3 - Fag e - Fel d 1 - Fel d 2…
Bos d 6 - Can f 1 - Can f 3 - Cap h_epithelia - Der p 23 - Der p 7 - Equ c 3 - Equ c_meat - Fel d 2 - Fel d 7 - Jug r 1 - Mala s 5 - Ory_meat - Pis v 3 - Rat n - Sus d 1 - Sus d_epithelia,1
Alt a 1 - Amb a - Amb a 1 - Bet v 1 - Bet v 2 - Cuc m 2 - Der f 2 - Der p 2 - Fel d 1 - Hev b 8 - Jug r_pollen - Mer a 1 - Phl p 12 - Phl p 2 - Pho d 2,1
Act d 2 - Bla g 4 - Cyn d - Cyn d 1 - Lol p 1 - Mala s 6 - Phl p 1 - Sec c_pollen,1
Aca s - Ach d - Alt a 1 - Amb a 1 - Ani s 3 - Api m - Api m 1 - Ara h 15 - Ara h 6 - Arg r 1 - Blo t 10 - Can f 6 - Chi spp. - Der f 2 - Der p 10 - Der p 2 - Der p 5 - Gad m - Gal d_meat - Hom g - Lit s - Loc m - Lol spp. - Myt e - Ost e - Pan b - Pen m 1 - Per a - Per a 7 - Rud spp. - Sin a 1 - Sol spp. - Ten m - Tyr p,1
Cla h 8 - Cyn d 1 - Der f 1 - Der f 2 - Der p 1 - Der p 2 - Der p 21 - Der p 23 - Der p 5 - Der p 7 - Lep d 2 - Lol p 1 - Phl p 1,1
Aca s - Blo t 5 - Can f 1 - Can f 4 - Can f 6 - Can f_male urine - Cuc p - Cyn d - Cyn d 1 - Der f 1 - Der f 2 - Der p 1 - Der p 2 - Der p 21 - Der p 23 - Der p 5 - Der p 7 - Fel d 4 - Fel d 7 - Gal d 2 - Gal d 4 - Gal d_white - Gly d 2 - Lep d 2 - Lol p 1 - Mala s 5 - Phl p 1 - Phl p 5.0101 - Tyr p - Tyr p 2,1
Alt a 1 - Bet v 1 - Can f 2 - Can f 4 - Der f 2 - Der p 2 - Der p 23 - Fel d 1 - Fel d 4 - Fic c - Fra a 1+3 - Ten m,1
Act d 2 - Alt a 1 - Amb a - Amb a 1 - Bet v 2 - Can f_male urine - Clu h 1 - Cuc m 2 - Cyp c 1 - Fel d 1 - Hev b 8 - Jug r_pollen - Mer a 1 - Par j 2 - Phl p 12 - Phl p 2 - Pho d 2 - Sal s 1 - Sco s 1 - Thu a 1 - Xip g 1,1
Alt a 1 - Bet v 1 - Cav p 1 - Cla h 8 - Cor a 1.0401 - Cyn d - Cyn d 1 - Fag s 1 - Lol p 1 - Phl p 1 - Phl p 2,1
Aca s - Aln g 1 - Alt a 1 - Ara h 8 - Bet v 1 - Blo t 21 - Blo t 5 - Can f 1 - Can f 6 - Can f_Fd1 - Cor a 1.0103 - Cor a 1.0401 - Cor a_pollen - Cyn d - Cyn d 1 - Dau c 1 - Der f 1 - Der f 2 - Der p 1 - Der p 2 - Der p 21 - Der p 23 - Der p 5 - Der p 7 - Fag s 1 - Fel d 1 - Fel d 4 - Fel d 7 - Fra a 1+3 - Gly d 2 - Gly m 4 - Lep d 2 - Lol p 1 - Mal d 1 - Ory c 3 - Phl p 1 - Phl p 2 - Phod s 1 - …
Alt a 1 - Che q - Cyn d - Cyn d 1 - Lol p 1 - Phl p 1 - Phl p 2 - Ves v 5,1
Alt a 1 - Amb a - Amb a 1 - Bla g 9 - Cry j 1 - Der p 20 - Fel d 1 - Par j 2 - Phl p 2 - Raj c - Urt d,1
Aca m - Act d 10 - All s - Alt a 1 - Alt a 6 - Ama r - Amb a - Api g 2 - Api m - Api m 1 - Api m 10 - Ara h 9 - Art v - Art v 3 - Can s - Can s 3 - Cap a - Car i - Car p - Cla h - Cla h 8 - Cor a 8 - Cyn d - Cyn d 1 - Der f 1 - Der f 2 - Der p 1 - Der p 2 - Der p 23 - Fag e - Fag e 2 - Fel d 1 - Fic b - Fra a 1+3 - Hom s LF - Hor v - Jug r 3 - Jug r_pollen - Lol p 1 - Mal d 3 - Pan m - Par j 2 - …
Alt a 1 - Bet v 1 - Cor a 1.0401 - Der f 2 - Der p 2 - Equ c 3 - Fel d 1 - Jug r_pollen - Lep d 2 - Phl p 2,1
Alt a 1 - Art v - Art v 1 - Equ c 3 - Pha v - Phl p 2,1
Alt a 1 - Bet v 1 - Can f 1 - Can f_Fd1 - Can f_male urine - Cyn d - Cyn d 1 - Fel d 1 - Fel d 7 - Lol p 1 - Pas n - Phl p 1 - Phl p 2,1
Aca s - Aln g 1 - Asp f 6 - Bet v 1 - Bla g 4 - Blo t 21 - Blo t 5 - Can f 1 - Can f 4 - Cla h 8 - Clu h - Clu h 1 - Cor a 1.0103 - Cor a 1.0401 - Cor a_pollen - Cyn d - Cyn d 1 - Cyp c 1 - Der f 1 - Der f 2 - Der p 1 - Der p 2 - Der p 21 - Der p 23 - Der p 5 - Der p 7 - Fag s 1 - Fel d 1 - Fra a 1+3 - Gad m - Gad m 1 - Gad m 2+3 - Gly d 2 - Gly m 6 - Hel a - Hev b 3 - Lep d 2 - Lol p 1 - Mal d 1…
Alt a 1 - Can f_Fd1 - Can f_male urine - Der f 1 - Der f 2 - Der p 1 - Der p 2 - Der p 23 - Der p 5 - Fel d 1 - Mus a - Phl p 2 - Phod s 1 - Pop n,1
Act d 1 - Act d 2 - All s - Ber e - Cla h - Cup a 1 - Gly m 5 - Phl p 7 - Phr c - Pim a - Sec c_flour - Tyr p,1
Alt a 1 - Der f 2 - Der p 2 - Jug r_pollen,1
Ani s 3 - Ara h 1 - Blo t 10 - Cla h - Der p 10 - Der p 5 - Gly m 6 - Hev b 6.02 - Lit s - Pen m 1 - Per a 7 - Pis v 1,1
Bla g 4 - Blo t 5 - Can f_Fd1 - Cuc p - Cyn d 1 - Der f 2 - Der p 2 - Der p 21 - Der p 23 - Der p 5 - Fel d 1 - Gal d 4 - Gal d_white - Gly d 2 - Lep d 2 - Mala s 5 - Par j 2 - Pru p 3 - Ves v 5,1
All s - Aln g 1 - Alt a 1 - Amb a - Amb a 1 - Bla g 5 - Can f 1 - Can f 4 - Can f_Fd1 - Can f_male urine - Cav p 1 - Clu h 1 - Cry j 1 - Cup a 1 - Der f 2 - Der p 2 - Fel d 1 - Fel d 7 - Jug r_pollen - Mala s 6 - Pet c - Phl p 2 - Ses i 1 - Sin a 1,1
Aca s - Ach d - Alt a 1 - Amb a 1 - Ani s 3 - Ara h 1 - Ara h 6 - Asp f 4 - Bla g 2 - Blo t 10 - Bos d 4 - Can f 2 - Can f 6 - Chi spp. - Cla h - Clu h - Cyp c 1 - Der p 1 - Der p 10 - Der p 5 - Fel d 1 - Fel d 4 - Gad m 1 - Hom g - Lit s - Loc m - Lol spp. - Mal d 2 - Mus m 1 - Myt e - Ost e - Pan b - Pen m 1 - Per a - Per a 7 - Rud spp. - Sol spp. - Ten m - Tyr p - Ves v - Ves v 1,1
Aln g 1 - Alt a 1 - Alt a 6 - Ara h 9 - Bet v 1 - Cla h 8 - Cor a 1.0103 - Cor a_pollen - Cyn d - Cyn d 1 - Fag s 1 - Lol p 1 - Mala s 11 - Pas n - Phl p 1 - Phl p 2 - Phl p 5.0101 - Phl p 6 - Pis v 4_RUO - Pop n - Pru p 3 - Sec c_pollen - Zea m 14,1
Aln g 1 - Alt a 1 - Bet v 1 - Cyn d - Cyn d 1 - Der f 2 - Der p 2 - Equ c 1 - Fag s 1 - Lep d 2 - Lol p 1 - Pas n - Phl p 1 - Phl p 2 - Phl p 5.0101 - Phr c - Ves v 5,1
Alt a 1 - Asp f 6 - Der f 2 - Der p 2 - Der p 21 - Der p 23 - Der p 5 - Der p 7 - Fel d 1 - Gly d 2 - Lep d 2 - Lol p 1 - Mala s 11 - Mala s 6 - Pha v - Phl p 1 - Tyr p 2,1
Alt a 1 - Bet v 1 - Can f 4 - Can f_Fd1 - Fag s 1 - Fel d 1 - Lol p 1 - Phl p 1 - Phl p 5.0101 - Phl p 6,1
Aln g 1 - Alt a 1 - Api g 1 - Api g 2 - Ara h 15 - Ara h 8 - Art v 3 - Bet v 1 - Bet v 2 - Can s 3 - Che q - Cor a 1.0103 - Cor a 1.0401 - Cor a 8 - Cor a_pollen - Cry j 1 - Cuc m 2 - Cup a 1 - Dau c - Dau c 1 - Der f 1 - Der f 2 - Der p 1 - Der p 2 - Der p 23 - Fag s 1 - Fra a 1+3 - Gal d 4 - Gal d_white - Gly d 2 - Hev b 8 - Jug r 3 - Jug r_pollen - Lep d 2 - Mal d 1 - Mal d 3 - Phl p 12 - Phl …
Alt a 1 - Blo t 5 - Cyn d 1 - Der f 1 - Der f 2 - Der p 1 - Der p 2 - Der p 21 - Der p 23 - Der p 5 - Der p 7 - Fel d 1 - Ory c 3,1
Alt a 1 - Der f 1 - Der f 2 - Der p 1,1
Alt a 1 - Bla g 9,1
Aca s - Act d 2 - Alt a 1 - Ara h 1 - Bos d 6 - Can f 1 - Can f 2 - Can f 3 - Can f 6 - Can f_male urine - Clu h - Clu h 1 - Cyp c 1 - Der f 1 - Der f 2 - Der p 1 - Der p 2 - Der p 23 - Equ c 1 - Equ c 3 - Fel d 1 - Fel d 2 - Fel d 4 - Fel d 7 - Gad m - Gad m 1 - Gal d_white - Gly d 2 - Hel a - Hev b 6.02 - Lep d 2 - Lol p 1 - Mal d 1 - Mus m 1 - Ory c 1 - Ory c 3 - Ovi a_meat - Phl p 1 - Sal s 1…
Ama r - Amb a 1 - Amb a 4 - Asp f 4 - Bro pa - Can f 4 - Can f_Fd1 - Cav p 1 - Cyn d 1 - Der f 1 - Der f 2 - Der p 1 - Der p 2 - Der p 23 - Equ c_meat - Fag s 1 - Hev b 11 - Hev b 3 - Hev b 6.02 - Lep d 2 - Ory_meat - Pen m 2 - Pers a - Pha v - Phl p 6 - Pis v 4_RUO - Raj c - Sal s - Sco s 1,1
Alt a 1 - Cuc m 2 - Phl p 12 - Phl p 5.0101 - Phl p 6 - Sec c_pollen,1
Aln g 4 - Alt a 1 - Ana o - Ber e - Blo t 5 - Bos d 5 - Bos d 6 - Bos d 8 - Bos d_milk - Can f 3 - Can f_Fd1 - Cap h_epithelia - Cap h_milk - Cic a - Clu h - Clu h 1 - Cor a 11 - Cor a 9 - Cyp c 1 - Der f 1 - Der f 2 - Der p 1 - Der p 2 - Der p 21 - Der p 5 - Equ c 3 - Fel d 1 - Fel d 2 - Fel d 4 - Gad m - Gad m 1 - Gad m 2+3 - Gal d 1 - Gal d 2 - Gal d 3 - Gal d_white - Gal d_yolk - Gly d 2 - Gl…
Api m 1 - Der f 2 - Der p 2 - Sac c,1
Aca m - Act d 1 - Ail a - Aln g 1 - Ama r - Amb a - Amb a 1 - Api g 1 - Ara h 8 - Art v - Art v 1 - Bet v 1 - Bet v 2 - Blo t 5 - Can f_Fd1 - Cor a 1.0103 - Cor a 1.0401 - Cor a_pollen - Cry j 1 - Cuc m 2 - Cyn d - Cyn d 1 - Dau c - Dau c 1 - Der f 2 - Der p 1 - Der p 2 - Der p 21 - Der p 23 - Equ c 1 - Fag s 1 - Fel d 1 - Fel d 4 - Fra a 1+3 - Hev b 8 - Jug r_pollen - Lep d 2 - Lol p 1 - Mac int…
Aca m - Aca s - Ail a - All s - Aln g 1 - Ama r - Amb a - Amb a 1 - Ana o - Ana o 2 - Api g 1 - Api m - Api m 10 - Ara h 1 - Ara h 3 - Ave s - Ber e - Bet v 1 - Bet v 6 - Bos d 4 - Bos d 5 - Bos d 6 - Bos d 8 - Bos d_meat - Bos d_milk - Cam d - Can f 3 - Cap a - Cap h_epithelia - Cap h_milk - Car c - Car i - Car p - Che q - Cic a - Clu h - Clu h 1 - Cor a 1.0103 - Cor a 1.0401 - Cor a 11 - Cor a …
Can f_Fd1 - Cor a 11 - Cor a 9 - Der f 1 - Der f 2 - Der p 1 - Der p 2 - Fel d 1 - Fel d 4 - Gal d_white - Mala s 11 - Mala s 6 - Ten m,1
Amb a - Amb a 1 - Api m - Api m 1 - Can f 1 - Cla h 8 - Cry j 1 - Der f 1 - Der f 2 - Der p 1 - Der p 2 - Der p 21 - Fel d 1 - Lep d 2,1
Amb a - Amb a 1 - Cla h 8 - Cry j 1 - Cup a 1 - Ves v - Ves v 5,1
Act d 2 - Act d 5 - All s - Aln g 1 - Ama r - Ana o - Ani s 1 - Ave s - Ber e - Bet v 1 - Bla g 2 - Bla g 4 - Bla g 5 - Blo t 10 - Blo t 21 - Cam d - Car p - Cla h - Cor a 1.0103 - Cor a 1.0401 - Cup a 1 - Cyn d - Cyn d 1 - Der p 23 - Fag s 1 - Fra a 1+3 - Gad m - Gad m 1 - Gal d_yolk - Gly m 5 - Hom g - Lol p 1 - Lup a - Mala s 6 - Pen m 3 - Phl p 1 - Rat n - Sal k - Sal k 1 - Sus d 1 - Tri a 19…
Ach d - Alt a 1 - Amb a - Amb a 1 - Amb a 4 - Api m - Api m 1 - Art v - Art v 1 - Blo t 21 - Can f 1 - Can f 4 - Can f_male urine - Can s - Cap a - Cry j 1 - Cyn d - Dol spp - Fel d 7 - Hom s LF - Phr c - Sal k - Sec c_pollen - Ten m - Ves v,1
Alt a 1 - Ama r - Api m - Api m 10 - Fel d 1 - Sal k 1,1
Act d 2 - Api m - Api m 10 - Bet v 1 - Bla g 4 - Lol p 1 - Mala s 6 - Phl p 1 - Phl p 2 - Phl p 5.0101 - Phl p 6 - Sec c_pollen - Tri a 19,1
Aln g 1 - Ara h 8 - Art v - Art v 1 - Bet v 1 - Bla g 4 - Cla h - Cor a 1.0103 - Cor a 1.0401 - Cor a_pollen - Cyn d - Cyn d 1 - Fag s 1 - Fel d 1 - Fra a 1+3 - Gly m 4 - Lol p 1 - Mal d 1 - Mus a - Par j 2 - Pen ch - Phl p 1 - Pop n - Pru p 3 - Sac c - Sec c_flour,1
Alt a 1 - Bet v 1 - Bla g 9 - Ves v 5,1
Aln g 1 - Alt a 1 - Bet v 1 - Can f_Fd1 - Der p 23 - Fag s 1 - Fel d 1 - Fra a 1+3,1
Aln g 1 - Alt a 1 - Bet v 1 - Bos d 2 - Cla h 8 - Cor a 1.0103 - Cor a 1.0401 - Der f 1 - Der f 2 - Der p 1 - Der p 2 - Der p 23 - Fag s 1 - Fel d 1 - Gly d 2 - Lep d 2 - Mal d 1,1
Ail a - Aln g 1 - Alt a 1 - Amb a - Amb a 1 - Api g 1 - Bet v 1 - Cor a 1.0103 - Cor a 1.0401 - Cor a_pollen - Cry j 1 - Cup a 1 - Dau c - Dau c 1 - Fag s 1 - Fel d 1 - Fra a 1+3 - Mal d 1 - Phl p 2 - Phod s 1,1
Aln g 1 - Alt a 1 - Ara h 8 - Bet v 1 - Can f 1 - Can f 2 - Can f 4 - Can f 6 - Can f_Fd1 - Can f_male urine - Cla h 8 - Cor a 1.0103 - Cor a 1.0401 - Cor a_pollen - Cyn d - Cyn d 1 - Equ c 1 - Fag s 1 - Fel d 1 - Fel d 4 - Fra a 1+3 - Gly m 4 - Lol p 1 - Lol spp. - Mal d 1 - Mes a 1_RUO - Ost e - Pas n - Phl p 1 - Phl p 2 - Sal k,1
Aln g 1 - Alt a 1 - Api g 1 - Ara h 8 - Asp f 3 - Bet v 1 - Bet v 2 - Car i - Cor a 1.0103 - Cor a 1.0401 - Cor a_pollen - Cry j 1 - Cuc m 2 - Dau c - Dau c 1 - Fag s 1 - Fra a 1+3 - Gal d 1 - Gal d 2 - Gal d_white - Gly m 4 - Jug r 1 - Jug r 2 - Jug r 6 - Mac inte - Mal d 1 - Mer a 1 - Phl p 12 - Phl p 2 - Phl p 5.0101 - Phl p 6 - Pho d 2 - Sec c_pollen,1
Aln g 1 - Alt a 1 - Api g 1 - Ara h 8 - Bet v 1 - Can f_male urine - Cor a 1.0103 - Cor a 1.0401 - Cor a_pollen - Cyn d - Cyn d 1 - Dau c - Dau c 1 - Fag s 1 - Fel d 1 - Fel d 4 - Fel d 7 - Fra a 1+3 - Jug r_pollen - Lol p 1 - Mal d 1 - Pas n - Phl p 1 - Phl p 5.0101 - Phl p 6 - Sec c_pollen,1
Alt a 1 - Amb a 4 - Ara h 1 - Art v - Art v 1 - Bet v 1 - Bla g 4 - Can f_Fd1 - Car i - Cor a 14 - Der f 1 - Der f 2 - Der p 1 - Der p 2 - Der p 23 - Fel d 1 - Hev b 6.02 - Jug r 1 - Jug r 2 - Jug r 4 - Jug r 6 - Lep d 2 - Phl p 2,1
Alt a 1 - Bla g 5,1
Alt a 1 - Bet v 1 - Cor a 1.0103 - Cry j 1 - Cuc p - Cup a 1 - Cyn d - Cyn d 1 - Fag s 1 - Lol p 1 - Mal d 1 - Phl p 1 - Phl p 5.0101 - Phl p 6 - Pop n,1
Aln g 1 - Api g 1 - Ara h 8 - Asp f 3 - Bet v 1 - Bet v 2 - Bla g 2 - Bla g 4 - Cor a 1.0103 - Cor a 1.0401 - Cor a_pollen - Cuc m 2 - Cyn d - Cyn d 1 - Fag s 1 - Fra a 1+3 - Gly m 4 - Gly m 6 - Lol p 1 - Mal d 1 - Mer a 1 - Pas n - Phl p 1 - Phl p 12 - Phl p 2 - Phl p 5.0101 - Phl p 6 - Pho d 2 - Sec c_pollen,1
Aca m - Ail a - All s - Aln g 1 - Alt a 1 - Ama r - Amb a - Amb a 4 - Api g 1 - Ara h 8 - Art v - Art v 1 - Bet v 1 - Bro pa - Can f 4 - Cap a - Car p - Che a 1 - Cic a - Cor a 1.0103 - Cor a 1.0401 - Cor a_pollen - Cry j 1 - Cup a 1 - Cyn d - Cyn d 1 - Dau c - Dau c 1 - Equ c 3 - Fag s 1 - Fel d 1 - Fra a 1+3 - Gly m 4 - Hom s LF - Jug r 2 - Jug r_pollen - Lol p 1 - Mal d 1 - Ole e 1 - Ost e - P…
Alt a 1 - Art v - Art v 1 - Blo t 5 - Der p 21,1
Blo t 21 - Blo t 5 - Bos d 2 - Can f_Fd1 - Cyn d - Cyn d 1 - Der f 1 - Der f 2 - Der p 1 - Der p 2 - Der p 21 - Der p 23 - Der p 5 - Der p 7 - Fel d 1 - Gly d 2 - Lep d 2 - Mala s 5 - Tyr p - Tyr p 2,1
Ach d - Alt a 1 - Art v - Art v 1 - Car i - Cyn d 1 - Der f 2 - Der p 2 - Gal d 1 - Gal d 2 - Gal d_white - Jug r 1 - Jug r 2 - Loc m - Phl p 1,1
Alt a 1 - Amb a - Amb a 4 - Api m - Api m 1 - Api m 10 - Der p 23 - Equ c 3 - Lol p 1 - Phl p 1 - Phl p 2,1
Alt a 6 - Clu h - Clu h 1 - Cyp c 1 - Gad m - Gad m 1 - Ost e - Sal s 1 - Sco s 1 - Thu a 1,1
Alt a 1 - Blo t 5 - Cyn d 1 - Der f 1 - Der f 2 - Der p 1 - Der p 2 - Der p 21 - Der p 23 - Der p 5 - Der p 7 - Gly d 2 - Myt e,1
Alt a 1 - Art v 1 - Bet v 2 - Cuc m 2 - Cyn d - Cyn d 1 - Lol p 1 - Mer a 1 - Phl p 1 - Phl p 12 - Phl p 2 - Pho d 2,1
Asp f 6 - Bos d_meat - Mala s 11,1
Alt a 1 - Amb a 1 - Api g 1 - Bet v 1 - Cla h 8 - Fag s 1 - Fel d 1 - Lol p 1 - Phl p 1 - Phl p 2 - Phl p 5.0101,1
Aln g 1 - Alt a 1 - Amb a - Amb a 1 - Api g 1 - Ara h 8 - Bet v 1 - Cor a 1.0103 - Cor a 1.0401 - Cyn d - Cyn d 1 - Dau c - Fag s 1 - Fel d 1 - Fra a 1+3 - Gly m 4 - Jug r_pollen - Lol p 1 - Pas n - Phl p 1,1
Amb a - Amb a 1 - Amb a 4 - Art v - Art v 1 - Bla g 4 - Bos d_meat - Can f_Fd1 - Cyn d - Equ c_meat - Fel d 1 - Gly m 5 - Lol p 1 - Mala s 6 - Myt e - Phl p 1 - Phr c - Sec c_pollen,1
Act d 2 - Ail a - All c - Aln g 1 - Alt a 1 - Amb a - Amb a 1 - Ana o - Api m - Art v - Bet v 2 - Bla g 4 - Bla g 5 - Bla g 9 - Cam d - Car p - Cup a 1 - Cyn d 1 - Der f 2 - Der p 11 - Der p 2 - Der p 21 - Fel d 1 - Gly m 5 - Mala s 6 - Pen m 2 - Phr c - Sal k - Sol spp. - Ulm c,1
Alt a 1 - Amb a - Amb a 1 - Bet v 1 - Can f 1 - Can f 4 - Can f 6 - Can f_Fd1 - Cyn d - Cyn d 1 - Dau c 1 - Equ c 1 - Fag s 1 - Fel d 1 - Fel d 4 - Fra a 1+3 - Lol p 1 - Phl p 1 - Phl p 2 - Ves v 5,1
Alt a 1 - Can f_Fd1 - Fel d 1 - Fel d 4 - Fel d 7 - Lol p 1 - Phl p 1,1
Alt a 1 - Can f 1 - Can f 4 - Can f 6 - Equ c 1 - Fel d 1 - Fel d 4 - Fel d 7 - Phl p 2 - Rat n,1
Act d 2 - Alt a 1 - Amb a - Amb a 1 - Bet v 1 - Clu h 1 - Cyp c 1 - Gad m - Gad m 1 - Gal d 4 - Sal s 1 - Sco s 1 - Sin a 1 - Thu a 1 - Xip g 1,1
Alt a 1 - Amb a - Amb a 1 - Asp f 6 - Cor a 8 - Mala s 11 - Mala s 6 - Phl p 2 - Sin - Sin a 1 - Zea m 14,1
Alt a 1 - Can f 4 - Can f_male urine - Fel d 1 - Ses i - Ses i 1,1
Alt a 1 - Ani s 3 - Blo t 10 - Can f_male urine - Der p 10 - Loc m - Pen m 1 - Per a 7 - Ten m,1
Act d 2 - All s - Alt a 1 - Amb a - Amb a 1 - Ber e - Can f 1 - Can f_Fd1 - Cry j 1 - Fel d 1 - Fel d 4,1
Alt a 1 - Amb a 1 - Ara h 1 - Fel d 1 - Gad m 1,1
Aca m - Ail a - All c - All s - Ama r - Amb a - Amb a 1 - Ana o - Ara h 15 - Art v - Art v 1 - Ber e - Bet v 2 - Bet v 6 - Bos d 8 - Bro pa - Can f 4 - Can f 6 - Can f_male urine - Cap a - Car i - Car p - Cic a - Cit s - Cor a 11 - Cor a 9 - Cry j 1 - Cuc m 2 - Cuc p - Cup a 1 - Cup s - Fic b - Fic c - Fra e - Gal d 2 - Gal d_white - Hel a - Hev b 8 - Hom s LF - Hor v - Jug r 2 - Jug r 6 - Jug r_…
Act d 2 - Alt a 1 - Asp f 6 - Ber e - Bla g 4 - Can f 6 - Clu h 1 - Cry j 1 - Cyp c 1 - Equ c 1 - Fel d 4 - Fra e 1 - Gal d 1 - Gal d 2 - Gal d 4 - Gal d_white - Hor v - Mala s 11 - Mus m 1 - Par j 2 - Phl p 2 - Rat n - Sal s 1 - Sco s 1 - Ten m - Thu a 1 - Ves v 5,1
Alt a 1 - Amb a 1 - Bet v 1 - Clu h - Clu h 1 - Cyp c 1 - Fel d 1 - Fel d 4 - Gad m - Gad m 1 - Gad m 2+3 - Ory c 1 - Sal s 1 - Sco s 1 - Thu a 1 - Xip g 1,1
Alt a 1 - Pop n - Ses i,1
Aca s - Alt a 1 - Amb a 1 - Blo t 5 - Der f 1 - Der f 2 - Der p 1 - Der p 2 - Der p 21 - Der p 23 - Der p 5 - Der p 7 - Fel d 1 - Gly d 2 - Tyr p,1
Alt a 1 - Bla g 4 - Bos d 5 - Equ c 3 - Gal d 1 - Gal d 2 - Gal d_white,1
Alt a 1 - Amb a - Amb a 1 - Ara h 1 - Ara h 2 - Ara h 3 - Ara h 6 - Bet v 2 - Can f_Fd1 - Cry j 1 - Cuc m 2 - Fel d 1 - Gly m 6 - Hev b 8 - Mer a 1 - Phl p 12 - Phl p 2 - Pho d 2 - Sin - Sin a 1,1
Alt a 1 - Art v - Art v 1 - Bos d 6 - Can f 3 - Can f_Fd1 - Cap h_epithelia - Equ c 3 - Equ c_meat - Fel d 1 - Fel d 2 - Fel d 4 - Fel d 7 - Ory c 3 - Ory_meat - Phl p 2 - Sus d 1 - Sus d_epithelia - Thu a 1,1
Act d 10 - Alt a 1 - Amb a - Amb a 1 - Api g 2 - Api g 6 - Ara h 9 - Art v - Art v 3 - Can f_Fd1 - Can s - Can s 3 - Cor a 1.0401 - Cor a 8 - Cyn d - Cyn d 1 - Der f 1 - Der f 2 - Der p 1 - Der p 2 - Der p 23 - Fag s 1 - Fel d 1 - Fic b - Fra a 1+3 - Jug r 3 - Lep d 2 - Lol p 1 - Mal d 3 - Ory c 2 - Phl p 1 - Pla a 3 - Pru p 3 - Sola l 6 - Tri a 14 - Vit v 1 - Zea m - Zea m 14,1
Blo t 5 - Cor a 14 - Cyn d - Cyn d 1 - Der f 1 - Der f 2 - Der p 1 - Der p 2 - Der p 21 - Der p 23 - Der p 5 - Gly d 2 - Mala s 11,1
Alt a 1 - Art v 1 - Ten m,1
Act d 2 - Alt a 1 - Ber e - Bla g 4 - Car p - Par j 2,1
Aln g 1 - Alt a 1 - Amb a 1 - Api g 1 - Api m - Api m 10 - Ara h 8 - Bet v 1 - Cor a 1.0103 - Cor a 1.0401 - Cor a_pollen - Dau c - Dau c 1 - Der f 1 - Der f 2 - Der p 2 - Der p 5 - Fag s 1 - Fra a 1+3 - Gly d 2 - Gly m 4 - Lep d 2 - Mal d 1 - Sal k 1,1
Act d 2 - Alt a 1 - Der f 2 - Der p 2 - Der p 20 - Der p 23 - Lep d 2,1
Aln g 1 - Alt a 1 - Amb a 1 - Ara h 8 - Bet v 1 - Can f 1 - Can f 3 - Can f 4 - Can f 6 - Can f_Fd1 - Can f_male urine - Cap h_epithelia - Cor a 1.0103 - Cor a_pollen - Fag s 1 - Fel d 1 - Fel d 2 - Fel d 4 - Fel d 7 - Lol p 1 - Pan b - Phl p 1 - Sus d 1 - Sus d_epithelia,1
Act d 2 - All s - Alt a 1 - Ber e - Bla g 2 - Bla g 4 - Bla g 5 - Gly m 5,1
Act d 1 - Alt a 1 - Amb a - Amb a 1 - Ara h 1 - Ara h 2 - Ara h 6 - Bet v 2 - Can f_Fd1 - Cuc m 2 - Cyn d 1 - Fel d 1 - Lup a - Mer a 1 - Phl p 1 - Phl p 12 - Pho d 2 - Sin - Sin a 1,1
Aca s - Alt a 1 - Blo t 5 - Cyn d 1 - Der f 1 - Der f 2 - Der p 1 - Der p 2 - Der p 21 - Der p 23 - Der p 5 - Der p 7 - Gly d 2 - Lep d 2 - Tyr p,1
Act d 2 - Alt a 1 - Ara h 1 - Bet v 1 - Bos d 5 - Gad m 1 - Hev b 6.02 - Phl p 2,1
Alt a 1 - Amb a - Amb a 1 - Bet v 1 - Cry j 1 - Fel d 1 - Mes a 1_RUO,1
Aca m - Act d 2 - Ama r - Amb a - Amb a 1 - Api m - Api m 1 - Api m 10 - Ara h 1 - Ara h 2 - Bet v 1 - Bet v 2 - Bet v 6 - Cuc m 2 - Cyn d - Cyn d 1 - Fag s 1 - Fra e - Hev b 8 - Jug r_pollen - Lol p 1 - Mala s 6 - Mer a 1 - Pas n - Phl p 1 - Phl p 12 - Phl p 5.0101 - Phl p 6 - Pho d 2 - Pop n - Sal k - Sec c_pollen,1
Ach d - Act d 2 - All s - Alt a 1 - Bet v 1 - Che q - Cic a - Cor a 1.0401 - Der f 2 - Der p 2 - Fel d 1 - Fra a 1+3 - Mal d 1 - Pap s - Phl p 2 - Phl p 5.0101 - Phl p 6 - Pis s - Sec c_pollen,1
Act d 1 - Amb a - Amb a 1 - Can f 1 - Can f 2 - Can f_male urine - Cla h 8 - Cry j 1 - Fag e - Fel d 7 - Fic b - Gal d 4 - Gal d_white - Par j 2 - Phl p 1 - Pru du - Sin - Sin a 1,1
Aca m - Act d 1 - Ail a - All s - Aln g 1 - Aln g 4 - Alt a 1 - Alt a 6 - Ama r - Amb a - Amb a 1 - Api g 1 - Ara h 1 - Ara h 2 - Ara h 3 - Ara h 6 - Ara h 8 - Bet v 1 - Bet v 6 - Bos d 6 - Bos d_meat - Can f 1 - Can f 2 - Can f 3 - Can f 4 - Can f 6 - Can f_Fd1 - Can f_male urine - Cap h_epithelia - Car i - Car p - Cav p 1 - Cic a - Clu h - Clu h 1 - Cor a 1.0103 - Cor a 1.0401 - Cor a 11 - Cor …
Alt a 1 - Ses i 1,1
Alt a 1 - Amb a - Amb a 1 - Amb a 4 - Art v - Art v 1 - Can f_male urine - Cry j 1 - Fel d 1 - Lol p 1 - Phl p 1,1
Alt a 1 - Der f 1 - Der f 2 - Der p 2 - Der p 23 - Gly d 2,1
Alt a 1 - Bet v 1 - Can f_male urine - Fel d 1 - Fra a 1+3,1
Act d 2 - Act d 5 - All s - Aln g 1 - Amb a - Ana o - Ani s 1 - Ave s - Ber e - Bla g 2 - Bla g 4 - Bla g 5 - Blo t 10 - Car p - Der p 23 - Gad m 1 - Gly m 5 - Lup a - Mala s 6 - Pen m 3 - Rat n - Sus d 1 - Tyr p,1
Aca s - Ach d - Amb a - Amb a 1 - Amb a 4 - Art v - Art v 1 - Can f 1 - Can f_Fd1 - Cav p 1 - Cyn d - Der f 2 - Der p 2 - Der p 21 - Der p 23 - Der p 5 - Fel d 1 - Fel d 7 - Gal d 2 - Gal d_white - Gly d 2 - Lep d 2 - Mala s 5 - Mus m 1 - Ory c 1 - Ory c 3 - Par j 2 - Phod s 1 - Tyr p - Tyr p 2,1
Act d 2 - Alt a 1 - Fel d 1 - Phl p 2,1
Alt a 1 - Amb a 1 - Ara h 1 - Ara h 2 - Ara h 3 - Ara h 6 - Can f 1 - Can f 2 - Cor a 14 - Fel d 1 - Fel d 7 - Pap s - Ses i - Ses i 1 - Sin - Sin a 1,1
Alt a 1 - Fel d 1 - Ost e,1
Act d 2 - Alt a 1 - Ber e - Bla g 5 - Car p,1
Alt a 1 - Can f 1 - Can f_Fd1 - Che a 1 - Fel d 1 - Fel d 7 - Sal k 1,1
Alt a 1 - Ber e - Fel d 1,1
Alt a 1 - Can f 4 - Can f 6 - Fag e 2,1
Act d 2 - All s - Ana o - Ana o 2 - Ara h 1 - Ara h 2 - Ara h 3 - Ara h 6 - Ave s - Ber e - Bet v 2 - Can f 3 - Cap a - Car i - Che q - Cic a - Clu h - Cor a 11 - Cor a 14 - Cor a 9 - Cuc m 2 - Cuc p - Dau c - Dau c 1 - Fag e - Fel d 2 - Gal d 3 - Gal d 4 - Gal d_meat - Gal d_white - Gal d_yolk - Gly m 6 - Hel a - Hom s LF - Hor v - Jug r 1 - Jug r 2 - Jug r 4 - Jug r 6 - Len c - Lup a - Mala s 6…
Aca m - Aca s - Ail a - Alt a 1 - Ama r - Amb a - Amb a 1 - Api g 2 - Art v - Art v 3 - Bet v 2 - Blo t 5 - Can s 3 - Cap a - Cor a 8 - Cry j 1 - Cuc m 2 - Cuc p - Cup a 1 - Cyn d - Cyn d 1 - Cyp c 1 - Der f 1 - Der f 2 - Der p 1 - Der p 2 - Der p 21 - Der p 23 - Der p 5 - Der p 7 - Fel d 1 - Fra a 1+3 - Gly d 2 - Hev b 3 - Hev b 6.02 - Jug r 3 - Jug r_pollen - Lep d 2 - Mal d 3 - Mala s 6 - Mer …
Alt a 1 - Amb a - Amb a 1 - Cry j 1 - Fag e 2 - Ost e - Phl p 2,1
Aca m - Ach d - Act d 10 - Ail a - Alt a 1 - Ama r - Amb a - Amb a 1 - Art v - Art v 1 - Bet v 2 - Can f 1 - Cla h - Cla h 8 - Clu h - Cry j 1 - Cuc m 2 - Cyn d - Fel d 1 - Gly d 2 - Hev b 8 - Jug r_pollen - Lep d 2 - Mala s 6 - Mer a 1 - Par j 2 - Phl p 12 - Phl p 2 - Pho d 2 - Raj c - Ses i 1 - Ten m - Urt d,1
Alt a 1 - Can f 1 - Can f_Fd1 - Der f 1 - Der p 1 - Der p 23 - Fel d 1 - Ory c 3 - Pha v - Phl p 2 - Phod s 1 - Pop n - Sec c_flour,1
Aca m - Alt a 1 - Amb a - Amb a 1 - Amb a 4 - Api m 1 - Ara h 1 - Art v - Art v 1 - Bla g 4 - Bos d 6 - Can f 1 - Can f 3 - Cap h_epithelia - Car i - Che q - Cor a 11 - Cry j 1 - Cup a 1 - Fag e - Fel d 1 - Fel d 2 - Fic c - Gal d 1 - Gal d 2 - Gal d 3 - Gal d 4 - Gal d 5 - Gal d_white - Gal d_yolk - Hel a - Hom s LF - Jug r 2 - Jug r 6 - Jug r_pollen - Mes a 1_RUO - Ory c 3 - Ovi a_meat - Par j …
Alt a 1 - Der f 1 - Der p 1,1
Alt a 1 - Amb a - Amb a 1 - Bet v 2 - Can f 1 - Can f 6 - Cry j 1 - Cuc m 2 - Der f 2 - Der p 2 - Equ c 1 - Fel d 1 - Fel d 4 - Fel d 7 - Hev b 8 - Mer a 1 - Phl p 12 - Pho d 2,1
Act d 2 - Alt a 1 - Cor a 9 - Der f 2 - Der p 2 - Equ c 3 - Fag e - Fel d 1 - Gal d_white - Gly d 2 - Jug r 4 - Lep d 2 - Pen m 3 - Phl p 2 - Pru du - Urt d,1
Alt a 1 - Bla g 9 - Der p 20 - Pen m 2,1
Alt a 1 - Che q - Phl p 1 - Pop n - Sec c_flour - Ulm c,1
Asp f 3,1
Aln g 1 - Alt a 1 - Amb a - Amb a 1 - Ara h 8 - Bet v 1 - Can f_Fd1 - Cla h 8 - Cor a 1.0103 - Cor a 1.0401 - Cor a_pollen - Cyn d - Cyn d 1 - Equ c 1 - Fag s 1 - Fel d 1 - Fra a 1+3 - Jug r_pollen - Lol p 1 - Mal d 1 - Pas n - Phl p 1 - Ves v 5,1
Amb a - Amb a 1 - Can f_Fd1 - Der f 1 - Der f 2 - Der p 2 - Der p 21 - Der p 23 - Der p 5 - Der p 7 - Fel d 1 - Lep d 2 - Mala s 11 - Tyr p,1
Alt a 1 - Amb a - Amb a 1 - Amb a 4 - Art v 1 - Cry j 1 - Lol p 1 - Phl p 1 - Phl p 5.0101 - Sola l 6,1
Aln g 1 - Alt a 1 - Amb a - Amb a 1 - Art v - Bet v 1 - Cor a 1.0103 - Fag s 1 - Fel d 1 - Fra a 1+3 - Lol p 1 - Phl p 1 - Phl p 5.0101 - Phl p 6 - Sec c_pollen,1
Amb a 1 - Can f_male urine - Cry j 1 - Fel d 1 - Lol p 1 - Mala s 5 - Ory c 3 - Phl p 1,1
Alt a 1 - Bet v 1 - Can f 1 - Can f 4 - Can f_Fd1 - Cyn d - Cyn d 1 - Fel d 1 - Fel d 7 - Lol p 1 - Phl p 1,1
Aca s - Amb a - Amb a 1 - Blo t 21 - Blo t 5 - Can s 3 - Cav p 1 - Cyn d - Cyn d 1 - Der f 1 - Der f 2 - Der p 1 - Der p 2 - Der p 21 - Der p 5 - Gly d 2 - Lol p 1 - Mala s 5 - Phl p 1 - Pol d - Pol d 5 - Tyr p - Ves v - Ves v 5,1
Aca m - Aca s - Act d 2 - All s - Aln g 1 - Ama r - Amb a - Amb a 1 - Amb a 4 - Ara h 1 - Art v - Art v 1 - Asp f 6 - Bet v 1 - Bet v 2 - Bla g 1 - Bla g 2 - Bla g 4 - Bos d_meat - Can f 1 - Can f 4 - Can f 6 - Can f_Fd1 - Can f_male urine - Car i - Che q - Cla h - Clu h 1 - Cor a 1.0103 - Cor a 1.0401 - Cor a 11 - Cor a_pollen - Cry j 1 - Cuc m 2 - Cyn d - Cyn d 1 - Der f 2 - Der p 2 - Der p 23 …
Alt a 1 - Der f 1 - Der p 1 - Phl p 2,1
Alt a 1 - Amb a - Amb a 1 - Art v - Art v 1 - Bet v 2 - Cry j 1 - Cuc m 2 - Der f 2 - Der p 2 - Fel d 1 - Hev b 8 - Jug r_pollen - Mer a 1 - Pers a - Phl p 12 - Pho d 2,1
Aca s - Ach d - Aln g 4 - Amb a - Amb a 1 - Blo t 5 - Can f_Fd1 - Clu h 1 - Cra c 6 - Cry j 1 - Cyn d - Cyn d 1 - Der f 1 - Der f 2 - Der p 1 - Der p 2 - Der p 21 - Der p 23 - Der p 5 - Der p 7 - Dol spp - Fel d 1 - Fel d 2 - Gal d 1 - Gal d 4 - Gly d 2 - Gly m 6 - Hom g - Lep d 2 - Lit s - Loc m - Lol spp. - Mala s 5 - Pan b - Per a - Phl p 2 - Pol d - Pol d 5 - Sco s 1 - Ten m - Thu a 1 - Tyr p…
Alt a 1 - Amb a 1 - Cry j 1 - Fel d 1 - Mala s 11 - Mes a 1_RUO,1
Aca s - Alt a 1 - Amb a - Amb a 1 - Can f 4 - Cla h 8 - Fel d 1 - Lol p 1 - Mes a 1_RUO - Phl p 1 - Tyr p,1
Amb a 1 - Asp f 3 - Bet v 1 - Cor a 1.0103 - Cry j 1 - Fag s 1 - Pop n - Sal k 1,1
Aln g 1 - Alt a 1 - Amb a - Amb a 1 - Amb a 4 - Ara h 8 - Ara h 9 - Art v - Art v 1 - Art v 3 - Bet v 1 - Bet v 2 - Can f_male urine - Cor a 1.0103 - Cor a 1.0401 - Cor a 8 - Cor a_pollen - Cry j 1 - Cuc m 2 - Cup a 1 - Der p 23 - Equ c 1 - Fag s 1 - Fel d 1 - Fel d 4 - Fel d 7 - Fra a 1+3 - Gly d 2 - Gly m 4 - Hev b 8 - Jug r_pollen - Lep d 2 - Mal d 1 - Mal d 3 - Mer a 1 - Mus m 1 - Phl p 12 - …
Alt a 1 - Ama r - Amb a - Amb a 1 - Can f 1 - Can f 6 - Equ c 1 - Fel d 1 - Fel d 4 - Fel d 7 - Mes a 1_RUO - Phl p 5.0101 - Phl p 6 - Rat n - Sal k 1 - Sec c_pollen,1
Aln g 1 - Alt a 1 - Ama r - Amb a - Amb a 1 - Amb a 4 - Art v - Art v 1 - Asp f 3 - Bet v 1 - Cor a 1.0103 - Cry j 1 - Der p 23 - Fag s 1 - Fel d 1 - Mal d 1 - Pha v - Phl p 2 - Phod s 1 - Sal k 1,1
Amb a 1 - Asp f 6 - Der f 1 - Der p 1 - Fel d 1 - Mala s 11,1
All s - Alt a 1 - Fel d 1 - Mala s 6 - Pap s - Phl p 2,1
Aca m - All s - Alt a 1 - Alt a 6 - Ama r - Asp f 3 - Che q - Equ c 3 - Fra e - Mala s 6 - Mus a - Pha v - Phl p 2 - Pop n - Sal k - Sec c_flour,1
Aca s - Alt a 1 - Cav p 1 - Der f 2 - Der p 2 - Lep d 2 - Phl p 5.0101 - Tyr p,1
Act d 2 - Alt a 1 - Lol p 1 - Phl p 1 - Phl p 2,1
Alt a 1 - Amb a - Amb a 1 - Art v - Asp f 3 - Can f 1 - Cry j 1 - Cyn d - Cyn d 1 - Fel d 1 - Fra a 1+3 - Lol p 1 - Pas n - Pha v - Phl p 1 - Phl p 2 - Phr c - Sec c_pollen - Ulm c - Zea m 14,1
Ach d - Alt a 1 - Amb a 1 - Art v 1 - Can f_Fd1 - Cry j 1 - Der p 23 - Fel d 1,1
Alt a 1 - Api m - Api m 10 - Der f 2 - Der p 2,1
Alt a 1 - Der f 1 - Der f 2 - Der p 1 - Der p 2 - Der p 23 - Lep d 2,1
Act d 10 - Act d 2 - Alt a 1 - Amb a - Amb a 1 - Api g 2 - Ara h 9 - Bet v 2 - Blo t 5 - Can f 1 - Can f_male urine - Cor a 8 - Cuc m 2 - Cyn d - Cyn d 1 - Der f 1 - Der f 2 - Der p 1 - Der p 2 - Der p 21 - Der p 23 - Der p 5 - Der p 7 - Fel d 1 - Fra a 1+3 - Gly d 2 - Hev b 8 - Jug r_pollen - Lep d 2 - Mal d 3 - Mer a 1 - Phl p 12 - Phl p 2 - Pho d 2 - Pla a 3 - Pla l - Pla l 1 - Pop n - Pru p 3…
Aln g 1 - Alt a 1 - Amb a - Amb a 1 - Bet v 1 - Bet v 2 - Cor a 1.0103 - Cor a_pollen - Cry j 1 - Cuc m 2 - Cup a 1 - Fag s 1 - Fel d 1 - Mal d 1 - Mer a 1 - Phl p 12 - Pho d 2,1
Act d 2 - Aln g 1 - Alt a 1 - Amb a - Amb a 1 - Bet v 1 - Can f_Fd1 - Cor a 1.0103 - Cor a 1.0401 - Cry j 1 - Der f 1 - Der f 2 - Der p 1 - Der p 2 - Fag s 1 - Fel d 1 - Fra a 1+3 - Lep d 2 - Mal d 1 - Mes a 1_RUO - Phl p 2,1
Aca s - Blo t 21 - Blo t 5 - Can f_male urine - Cla h 8 - Cyn d 1 - Der f 2 - Der p 10 - Der p 2 - Der p 21 - Der p 23 - Der p 5 - Der p 7 - Fel d 1 - Gly d 2 - Lep d 2 - Loc m - Pen m 1 - Ten m - Tyr p,1
Aln g 1 - Alt a 1 - Amb a - Amb a 1 - Bet v 1 - Cuc m 2 - Fag s 1 - Fel d 1 - Fra a 1+3 - Mer a 1 - Myt e - Phl p 12 - Pho d 2,1
Alt a 1 - Can f 2 - Can f 4 - Can f 6 - Can f_Fd1 - Der f 2 - Der p 2 - Equ c 1 - Fel d 1 - Fel d 4 - Fel d 7 - Lep d 2 - Ory c 3,1
Act d 2 - Ail a - All c - Aln g 1 - Alt a 1 - Api g 2 - Art v - Bet v 2 - Bla g 4 - Bla g 5 - Car p - Cup a 1 - Der f 1 - Hel a - Mala s 6 - Pen m 2 - Pim a,1
Act d 2 - Alt a 1 - Phl p 2 - Sola l,1
Act d 10 - Alt a 1 - Amb a - Amb a 1 - Api g 2 - Ara h 9 - Ave s - Bos d 6 - Can f 1 - Can f 2 - Can f 4 - Can f 6 - Can f_Fd1 - Can s - Can s 3 - Cor a 11 - Cor a 8 - Cor a 9 - Cry j 1 - Cyn d - Cyn d 1 - Equ c 1 - Fel d 1 - Fel d 4 - Fel d 7 - Fra a 1+3 - Jug r 3 - Jug r 4 - Lol p 1 - Mal d 3 - Pas n - Phl p 1 - Phl p 2 - Phl p 5.0101 - Phl p 6 - Pla a 3 - Pru av - Pru du - Pru p 3 - Vit v 1 - …
Alt a 1 - Amb a - Amb a 1 - Ana o - Ana o 2 - Art v 3 - Ave s - Ber e - Bet v 1 - Can f_Fd1 - Car i - Che q - Cic a - Cor a 11 - Cor a 9 - Cor a_pollen - Cry j 1 - Cuc p - Cup a 1 - Fag e - Fag s 1 - Fel d 1 - Fra a 1+3 - Gal d 1 - Gal d 2 - Gal d 4 - Gal d_white - Gly m 6 - Hel a - Jug r 1 - Jug r 2 - Jug r 4 - Jug r 6 - Lol p 1 - Lup a - Mac inte - Ory c 3 - Pap s - Phl p 1 - Pis v 2 - Pis v 3 …
Act d 2 - Alt a 1 - Alt a 6 - Amb a - Amb a 1 - Bet v 1 - Cyn d - Cyn d 1 - Fag s 1 - Fel d 1 - Lol p 1 - Mala s 5 - Pas n - Phl p 1 - Phl p 2 - Phl p 5.0101 - Phl p 6 - Sec c_pollen,1
Alt a 1 - Amb a 1 - Can f_male urine - Cry j 1,1
Aca s - Alt a 1 - Blo t 5 - Cyn d 1 - Der f 1 - Der f 2 - Der p 1 - Der p 2 - Der p 21 - Der p 23 - Der p 5 - Gly d 2 - Phl p 1 - Tyr p,1
Ail a - Aln g 1 - Aln g 4 - Alt a 1 - Alt a 6 - Amb a - Amb a 1 - Art v - Asp f 3 - Bet v 1 - Bla g 4 - Can f 1 - Can f 2 - Can f 6 - Can f_Fd1 - Clu h - Clu h 1 - Cor a 1.0103 - Cor a 1.0401 - Cry j 1 - Cyp c 1 - Equ c 1 - Fag s 1 - Fel d 1 - Fel d 4 - Fel d 7 - Fra a 1+3 - Gad m - Gad m 1 - Jug r_pollen - Lol p 1 - Mal d 1 - Mes a 1_RUO - Par j 2 - Phl p 1 - Phl p 2 - Phl p 7 - Phr c - Sal k - …
Act d 2 - All s - Can f_Fd1 - Cap a - Cor a 8 - Cry j 1 - Cyp c 1 - Der f 1 - Der f 2 - Der p 1 - Der p 2 - Der p 23 - Der p 7 - Fel d 1 - Fic b - Gly d 2 - Gly m 5 - Lep d 2 - Mala s 5 - Tyr p - Tyr p 2,1
Alt a 1 - Amb a - Amb a 1 - Can f_Fd1 - Der f 1 - Der p 1 - Fel d 1 - Fel d 4,1
Aca s - Act d 2 - All s - Amb a - Amb a 1 - Art v - Ber e - Bet v 1 - Can f 3 - Cry j 1 - Der f 1 - Der f 2 - Der p 1 - Der p 2 - Der p 23 - Der p 7 - Fag s 1 - Fel d 1 - Fra a 1+3 - Gly d 2 - Lep d 2 - Lol p 1 - Mala s 5 - Mus m 1 - Phl p 1 - Phod s 1 - Raj c - Rat n - Sal k 1 - Tyr p - Ves v 5,1
Aca s - Act d 10 - Amb a - Amb a 1 - Art v - Art v 1 - Blo t 5 - Bos d 4 - Can f 1 - Can f 6 - Can f_Fd1 - Cry j 1 - Cyn d - Cyn d 1 - Der f 1 - Der f 2 - Der p 1 - Der p 2 - Der p 21 - Der p 23 - Der p 5 - Der p 7 - Fag s 1 - Fel d 1 - Fel d 4 - Fel d 7 - Gal d 4 - Mala s 11 - Phl p 1 - Phl p 2 - Tyr p,1
Alt a 1 - Asp f 3 - Cyn d 1 - Der f 1 - Der f 2 - Der p 1 - Der p 2 - Der p 21 - Der p 23 - Der p 5 - Der p 7 - Fel d 1 - Gly d 2 - Lep d 2 - Phl p 2 - Tyr p 2,1
Alt a 1 - Alt a 6 - Can f_male urine - Cla h - Cla h 8,1
Alt a 1 - Art v 1 - Der f 2 - Der p 2 - Fel d 1 - Ves v - Ves v 5,1
Aln g 1 - Alt a 1 - Amb a - Amb a 1 - Api g 1 - Ara h 8 - Bet v 1 - Bet v 2 - Bla g 9 - Cor a 1.0103 - Cor a 1.0401 - Cor a 9 - Cor a_pollen - Cuc m 2 - Dau c - Dau c 1 - Fag s 1 - Fel d 1 - Fra a 1+3 - Gly m 4 - Hev b 8 - Mal d 1 - Mala s 6 - Mer a 1 - Phl p 12 - Phl p 2 - Pho d 2 - Ten m,1
Alt a 1 - Clu h 1 - Cyn d - Cyn d 1 - Fel d 1 - Lol p 1 - Pas n - Phl p 1 - Phl p 2 - Sal s 1 - Sco s 1 - Ves v 5,1
Can f 1 - Can f 2 - Can f 6 - Equ c 1 - Fel d 1 - Fel d 7 - Mala s 6,1
Alt a 1 - Amb a 1 - Art v 1,1
Alt a 1 - Cla h 8,1
Aln g 1 - Alt a 1 - Amb a 1 - Bet v 1 - Can f 1 - Cor a 1.0103 - Der f 1 - Der f 2 - Der p 1 - Der p 2 - Fag s 1 - Fel d 1 - Fel d 7 - Gly d 2 - Tyr p 2,1
Alt a 1 - Amb a - Amb a 1 - Bet v 1 - Can f 1 - Can f 6 - Can f_male urine - Cic a - Fag s 1 - Fel d 1 - Fel d 4 - Fel d 7 - Phl p 2,1
Act d 2 - Aln g 1 - Alt a 1 - Amb a - Amb a 1 - Ani s 3 - Bet v 1 - Bla g 4 - Bla g 5 - Bos d_meat - Can f 1 - Can f_Fd1 - Cla h - Cla h 8 - Cry j 1 - Equ c_meat - Fel d 1 - Fel d 2 - Fel d 4 - Fel d 7 - Gal d 2 - Gly m 5 - Gly m 8 - Mala s 6 - Ory c 3 - Ovi a_meat - Par j 2 - Phl p 2 - Sus d 1,1
Aca s - Ach d - Act d 2 - All s - Aln g 1 - Alt a 1 - Amb a - Amb a 1 - Ani s 3 - Asp f 3 - Bet v 1 - Bet v 6 - Bla g 4 - Blo t 10 - Can f 1 - Can f_Fd1 - Can f_male urine - Chi spp. - Cla h - Cor a 1.0103 - Cor a 1.0401 - Cor a_pollen - Cry j 1 - Cup a 1 - Der p 10 - Der p 7 - Fag s 1 - Fel d 1 - Fra a 1+3 - Hom g - Lit s - Loc m - Lol p 1 - Lol spp. - Mal d 1 - Mala s 6 - Mes a 1_RUO - Myt e - …
Alt a 1 - Can f 3 - Pha v,1
Act d 2 - Alt a 1 - Api m 10 - Ara h 1 - Ber e - Can f 4 - Can f_male urine - Fel d 1 - Fel d 7 - Ory c 3,1
Alt a 1 - Amb a - Amb a 1 - Can f_Fd1 - Cyn d - Cyn d 1 - Fel d 1 - Lol p 1 - Pas n - Phl p 1 - Phl p 2 - Phod s 1 - Ses i 1,1
Alt a 1 - Bet v 1 - Can f_male urine - Cor a 1.0401 - Cyn d - Cyn d 1 - Der f 2 - Der p 2 - Der p 23 - Fel d 1 - Lol p 1 - Phl p 1 - Phl p 5.0101,1
Alt a 1 - Pop n - Sec c_flour - Ulm c,1
Alt a 1 - Alt a 6 - Amb a - Amb a 1 - Art v - Art v 3 - Bet v 1 - Bet v 2 - Cla h 8 - Cry j 1 - Cuc m 2 - Hev b 8 - Jug r_pollen - Mer a 1 - Phl p 12 - Pho d 2,1
Alt a 1 - Ana o 2 - Ara h 1 - Ara h 2 - Ara h 3 - Ara h 6 - Ber e - Can f 1 - Can f 2 - Can f_Fd1 - Car i - Cic a - Cor a 11 - Cor a 14 - Cor a 9 - Cor a_pollen - Fel d 1 - Fel d 7 - Gly m 6 - Jug r 1 - Jug r 2 - Jug r 4 - Jug r 6 - Len c - Mac inte - Ost e - Pen m 3 - Pis s - Sus d 1 - Tri fo,1
All s - Alt a 1 - Amb a - Amb a 1 - Art v - Art v 1 - Art v 3 - Can f_Fd1 - Cry j 1 - Cup a 1 - Der f 2 - Der p 2 - Fel d 1 - Fra a 1+3 - Jug r_pollen - Lep d 2 - Mal d 3 - Pla a 2 - Pol d 5 - Pru p 3 - Sec c_pollen - Zea m 14,1
Act d 2 - Alt a 1 - Amb a - Amb a 1 - Amb a 4 - Ana o - Ana o 3 - Api m 10 - Ara h 1 - Art v - Art v 1 - Ave s - Ber e - Bla g 4 - Bos d 8 - Can f 1 - Can f 6 - Car c - Car i - Che q - Cic a - Cor a 11 - Cor a 14 - Cor a 8 - Cor a 9 - Cor a_pollen - Cuc p - Cyn d - Cyn d 1 - Fag e - Fel d 1 - Fel d 7 - Gal d 1 - Gal d 2 - Gal d 3 - Gal d_white - Gal d_yolk - Gly m 5 - Gly m 6 - Hel a - Hev b 3 - …
Aln g 1 - Aln g 4 - Alt a 1 - Alt a 6 - Amb a - Amb a 1 - Ana o - Api g 1 - Api m - Api m 1 - Api m 10 - Ara h 1 - Ara h 2 - Ara h 3 - Ara h 6 - Ara h 8 - Art v - Bet v 1 - Bet v 2 - Bla g 2 - Bla g 4 - Can f 4 - Can f 6 - Can f_Fd1 - Can f_male urine - Car i - Che a 1 - Cic a - Cor a 1.0103 - Cor a 1.0401 - Cor a 14 - Cor a_pollen - Cry j 1 - Cuc m 2 - Cup a 1 - Dau c - Dau c 1 - Der f 1 - Equ c…
Aln g 1 - Amb a - Amb a 4 - Api g 1 - Art v - Art v 1 - Bet v 1 - Bla g 2 - Bla g 4 - Can f_Fd1 - Can f_male urine - Cav p 1 - Clu h - Clu h 1 - Cor a 1.0103 - Cor a 1.0401 - Cor a_pollen - Cyn d - Cyp c 1 - Dau c - Dau c 1 - Equ c 1 - Fag s 1 - Fel d 1 - Fra a 1+3 - Gad m - Gad m 1 - Lol p 1 - Mal d 1 - Ost e - Par j 2 - Phl p 1 - Phr c - Pla a 2 - Sac c - Sal s 1 - Sco s - Sco s 1 - Sec c_polle…
Aca s - Act d 2 - Can f_male urine - Cor a 11 - Cry j 1 - Cyn d - Cyn d 1 - Der f 1 - Der f 2 - Der p 1 - Der p 2 - Der p 23 - Fel d 1 - Gly d 2 - Lep d 2 - Lol p 1 - Mala s 6 - Phl p 1 - Tyr p,1
Alt a 1 - Art v - Cyn d - Cyn d 1 - Lol p 1 - Phl p 1,1
All s - Alt a 1 - Bla g 9 - Der f 1 - Lol p 1 - Mala s 6 - Mus m 1 - Phl p 1 - Phl p 2,1
Alt a 6 - Amb a - Amb a 1 - Can f 1 - Can f 4 - Can f 6 - Can f_Fd1 - Cyn d - Cyn d 1 - Equ c 1 - Fel d 1 - Fel d 4 - Fel d 7 - Lol p 1 - Phl p 1,1
Aca s - Amb a - Amb a 1 - Amb a 4 - Art v - Art v 1 - Blo t 5 - Can f 1 - Can f_male urine - Cry j 1 - Cyn d - Cyn d 1 - Der f 1 - Der f 2 - Der p 1 - Der p 2 - Der p 21 - Der p 23 - Der p 5 - Der p 7 - Fel d 7 - Gly d 2 - Lep d 2 - Mala s 5 - Phr c - Sec c_pollen - Tyr p,1
Alt a 1 - Art v - Art v 1 - Cla h 8,1
Act d 1 - Aln g 1 - Amb a - Amb a 1 - Amb a 4 - Api g 1 - Ara h 8 - Art v - Art v 1 - Asp f 6 - Bet v 1 - Can f 1 - Can f_male urine - Car i - Che a 1 - Cor a 1.0103 - Cor a 1.0401 - Cor a 11 - Cor a 14 - Cor a_pollen - Cuc p - Dau c - Dau c 1 - Fag s 1 - Fel d 1 - Fel d 7 - Fra a 1+3 - Gly m 4 - Jug r 2 - Jug r 6 - Mac inte - Mal d 1 - Mala s 11 - Pap s - Sal k 1 - Ses i - Ses i 1,1
Alt a 1 - Bet v 1 - Can f_male urine - Cor a 1.0103 - Der f 2 - Der p 2 - Fel d 1 - Fra a 1+3 - Gly m 4 - Phl p 2 - Rat n,1
Act d 2 - Aln g 1 - Alt a 1 - Bet v 1 - Can f_Fd1 - Cor a 1.0401 - Fel d 1 - Fra a 1+3 - Fra e - Fra e 1 - Lol p 1 - Mal d 1 - Ole e 1 - Ory c 3 - Phl p 1 - Phl p 2,1
Alt a 1 - Amb a - Amb a 1 - Bla g 1 - Can f_Fd1 - Cry j 1 - Cyn d - Cyn d 1 - Fel d 1 - Lol p 1 - Pas n - Phl p 1 - Phl p 2 - Urt d - Vac m,1
Aca m - All s - Aln g 1 - Ama r - Amb a - Amb a 1 - Api g 1 - Ara h 8 - Bet v 1 - Bos d 6 - Can f 4 - Can f_Fd1 - Cor a 1.0103 - Cor a 1.0401 - Cor a_pollen - Cry j 1 - Cup a 1 - Cyn d - Cyn d 1 - Dau c - Dau c 1 - Der f 1 - Fag s 1 - Fel d 1 - Fra a 1+3 - Gal d 2 - Gal d 3 - Gal d 4 - Gal d_white - Gal d_yolk - Gly m 4 - Lol p 1 - Mal d 1 - Mala s 6 - Pas n - Phl p 1 - Phod s 1 - Sec c_pollen - …
Act d 2 - Aln g 1 - Alt a 1 - Alt a 6 - Amb a - Amb a 1 - Api g 1 - Ara h 8 - Asp f 4 - Bet v 1 - Bet v 2 - Bet v 6 - Bla g 4 - Can f 2 - Can f 4 - Can f 6 - Can f_male urine - Cav p 1 - Cla h - Cor a 1.0103 - Cor a 1.0401 - Cor a 14 - Cor a_pollen - Cry j 1 - Cuc m 2 - Cyn d - Cyn d 1 - Dau c - Dau c 1 - Equ c 1 - Fag s 1 - Fel d 1 - Fra a 1+3 - Gly m 4 - Gly m 8 - Hev b 8 - Jug r 1 - Jug r_poll…
Aca s - Ach d - Act d 2 - All s - Aln g 1 - Alt a 6 - Amb a - Amb a 1 - Ani s 3 - Asp f 3 - Ber e - Bet v 1 - Bla g 9 - Blo t 10 - Can f 1 - Can f_Fd1 - Car p - Chi spp. - Cor a 1.0103 - Cor a 1.0401 - Cor a 9 - Cor a_pollen - Cry j 1 - Cyn d 1 - Dau c - Der f 1 - Der f 2 - Der p 1 - Der p 10 - Der p 2 - Der p 20 - Der p 23 - Der p 5 - Fag s 1 - Fel d 1 - Fel d 7 - Fra a 1+3 - Gly m 5 - Hom g - L…
Bet v 1 - Bet v 6 - Der f 1 - Der p 1 - Fel d 1 - Mala s 11,1
Alt a 1 - Amb a - Amb a 1 - Blo t 21 - Blo t 5 - Cry j 1 - Cyn d 1 - Der f 1 - Der f 2 - Der p 1 - Der p 2 - Der p 21 - Der p 5 - Fel d 1 - Gly d 2,1
Alt a 1 - Amb a - Amb a 1 - Bet v 1 - Bet v 2 - Bla g 4 - Can f 1 - Can f 2 - Can f 4 - Can f 6 - Can f_male urine - Cor a 1.0103 - Cry j 1 - Cuc m 2 - Fag s 1 - Fel d 1 - Fel d 4 - Fel d 7 - Fra a 1+3 - Hev b 8 - Mer a 1 - Ost e - Par j 2 - Phl p 1 - Phl p 12 - Phl p 2 - Pho d 2 - Pla a 1 - Pol d 5 - Pru p 3 - Sac c,1
Alt a 1 - Amb a - Amb a 1 - Bla g 4 - Car i - Clu h 1 - Cry j 1 - Cup a 1 - Cyp c 1 - Fel d 1 - Jug r 1 - Jug r 2 - Jug r 6 - Par j 2 - Pen m 2 - Sal s - Sal s 1 - Sco s 1 - Ses i - Ses i 1 - Sin - Sin a 1 - Thu a 1 - Xip g 1,1
Alt a 1 - Amb a - Amb a 1 - Ara h 1 - Ara h 2 - Bet v 1 - Bla g 9 - Can f 1 - Can f 2 - Can f_Fd1 - Cry j 1 - Cup a 1 - Der f 2 - Der p 2 - Der p 20 - Der p 5 - Fel d 1 - Fel d 4 - Fel d 7 - Gal d 4 - Gal d_white - Gly d 2 - Lep d 2 - Pen m 2 - Sin a 1,1
Aln g 1 - Alt a 1 - Amb a - Amb a 1 - Api g 1 - Ara h 8 - Bet v 1 - Cor a 1.0103 - Cor a 1.0401 - Cor a_pollen - Dau c 1 - Fag s 1 - Fel d 1 - Fra a 1+3 - Mal d 1 - Phl p 2 - Pla a 2 - Pop n - Sal k,1
Act d 2 - Alt a 1 - Amb a - Amb a 1 - Amb a 4 - Art v - Art v 1 - Ber e - Bla g 4 - Can f 6 - Car p - Cry j 1 - Phl p 2 - Phl p 5.0101,1
Alt a 1 - Amb a - Amb a 1 - Bet v 6 - Can f_Fd1 - Cry j 1 - Der f 1 - Fel d 1 - Phl p 1,1
Aca m - Ach d - Act d 1 - All s - Alt a 1 - Ama r - Amb a - Amb a 1 - Ani s 3 - Ara h 9 - Art v - Ber e - Blo t 10 - Can f_Fd1 - Chi spp. - Cor a 8 - Cry j 1 - Cup a 1 - Cyn d - Cyn d 1 - Der p 10 - Fel d 1 - Fra a 1+3 - Hom s LF - Jug r_pollen - Loc m - Lol p 1 - Mal d 3 - Mala s 6 - Ory c 3 - Pas n - Pen m 1 - Per a 7 - Phl p 1 - Phr c - Pla a 2 - Pla a 3 - Pop n - Pru p 3 - Sal k - Sal k 1 - S…
Alt a 1 - Der p 1 - Der p 23,1
Aca m - Alt a 1 - Ama r - Asp f 3 - Bla g 4 - Can f_male urine - Cuc p - Cyn d - Fel d 1 - Mala s 6 - Par j 2 - Pen ch - Phl p 2 - Pop n - Pru p 3 - Sac c,1
Alt a 1 - Alt a 6 - Amb a 1 - Asp f 3 - Bla g 4 - Der f 1 - Par j 2 - Phl p 2 - Sac c,1
Aca m - Act d 1 - Ail a - All c - All s - Alt a 1 - Ama r - Amb a - Amb a 1 - Ana o - Ara h 1 - Art v - Asp f 3 - Ave s - Bet v 2 - Bos d 5 - Bro pa - Can s - Cap a - Car c - Car i - Car p - Che q - Cic a - Cor a 11 - Cor a_pollen - Cry j 1 - Cuc m 2 - Cuc p - Cup a 1 - Cup s - Cyn d - Dau c - Fag e - Fel d 1 - Fic b - Fic c - Fra e - Hel a - Hev b 8 - Hom s LF - Hor v - Jug r 2 - Jug r 6 - Jug r…
Act d 1 - Aln g 1 - Alt a 1 - Ama r - Amb a - Amb a 1 - Api g 1 - Ara h 8 - Ber e - Bet v 1 - Bet v 2 - Can f_male urine - Cor a 1.0103 - Cor a 1.0401 - Cor a_pollen - Cry j 1 - Cuc m 2 - Dau c - Dau c 1 - Fag s 1 - Fel d 1 - Fra a 1+3 - Gly m 4 - Hel a - Hev b 8 - Mal d 1 - Mala s 6 - Mer a 1 - Pha v - Phl p 12 - Pho d 2 - Phod s 1 - Pop n - Sal k - Sal k 1 - Sec c_flour - Ses i - Ulm c,1
Amb a 1 - Bet v 1 - Can f_male urine - Cla h 8 - Cor a 1.0103 - Cry j 1 - Cyn d 1 - Fel d 1 - Jug r_pollen - Lol p 1 - Mus m 1 - Ory c 3 - Phl p 1 - Rat n,1
Alt a 1 - Der f 1 - Der f 2 - Der p 1 - Der p 2 - Fel d 1 - Gly d 2 - Lep d 2 - Tyr p 2,1
Ach d - Alt a 1 - Amb a - Amb a 1 - Can f_Fd1 - Cry j 1 - Fel d 1 - Loc m - Ten m,1
Alt a 1 - Art v 1 - Bet v 2 - Bla g 2 - Blo t 10 - Can f 1 - Can f_Fd1 - Car p - Cla h 8 - Cuc m 2 - Fel d 1 - Hev b 8 - Mer a 1 - Phl p 12 - Pho d 2 - Sin a 1,1
Aln g 4 - Ama r - Amb a - Amb a 1 - Ana o - Ave s - Ber e - Bet v 1 - Bet v 2 - Can f 1 - Can f 4 - Can f 6 - Car i - Cav p 1 - Cic a - Cor a 1.0103 - Cor a 1.0401 - Cor a 11 - Cor a 14 - Cor a 9 - Cor a_pollen - Cry j 1 - Cuc m 2 - Cup a 1 - Fag e - Fag e 2 - Fag s 1 - Fel d 1 - Fel d 4 - Fel d 7 - Fra a 1+3 - Fra e - Gal d 1 - Gal d 2 - Gal d 3 - Gal d 4 - Gal d 5 - Gal d_white - Gal d_yolk - G…
Alt a 1 - Api m - Api m 10 - Fel d 1,1
Act d 2 - Act d 5 - All s - Aln g 1 - Amb a - Amb a 1 - Ana o - Ani s 1 - Ave s - Ber e - Bla g 2 - Bla g 4 - Bla g 5 - Blo t 10 - Cam d - Car p - Cry j 1 - Cup a 1 - Fic b - Gad m - Gad m 1 - Gly m 5 - Lup a - Mala s 6 - Phl p 7 - Pis v 3 - Rat n - Sal k - Sus d 1 - Tyr p,1
Act d 2 - All s - Alt a 1 - Amb a - Amb a 1 - Ber e - Car p - Fel d 1 - Fel d 4 - Gly m 5,1
Act d 2 - Aln g 1 - Alt a 1 - Amb a - Amb a 1 - Ber e - Bet v 1 - Bla g 4 - Can f 1 - Can f_Fd1 - Car p - Cor a 1.0103 - Cor a 1.0401 - Cor a_pollen - Cry j 1 - Equ c 1 - Fag s 1 - Fel d 1 - Fel d 7 - Fra a 1+3 - Gly m 4 - Hev b 3 - Mal d 1 - Par j 2 - Phl p 2,1
Act d 2 - Aln g 1 - Alt a 1 - Amb a - Amb a 1 - Api g 1 - Ara h 8 - Art v 1 - Ber e - Bet v 1 - Bet v 2 - Bla g 4 - Bla g 5 - Blo t 5 - Can f 1 - Can f 6 - Can f_Fd1 - Car p - Cor a 1.0103 - Cor a 1.0401 - Cor a_pollen - Cry j 1 - Cuc m 2 - Cup a 1 - Dau c - Dau c 1 - Der f 2 - Der p 2 - Der p 21 - Der p 23 - Equ c 1 - Fag s 1 - Fel d 1 - Fel d 4 - Fra a 1+3 - Gly d 2 - Gly m 4 - Hev b 8 - Lep d …
Alt a 1 - Der f 2 - Der p 2 - Der p 23 - Gly d 2 - Lep d 2 - Ten m,1
Aca s - Alt a 1 - Amb a 1 - Api m - Api m 10 - Can f 4 - Cyn d 1 - Der f 1 - Der f 2 - Der p 1 - Der p 2 - Der p 23 - Der p 5 - Der p 7 - Lep d 2 - Lol p 1 - Phl p 1 - Phl p 2 - Phl p 5.0101 - Phl p 6 - Rat n - Sec c_pollen - Tyr p,1
Cla h 8 - Gad m 1 - Pers a,1
Alt a 1 - Api m - Api m 10 - Equ c 3 - Phl p 2,1
Alt a 1 - Alt a 6 - Can f_Fd1 - Cla h - Cla h 8 - Fel d 1 - Mala s 6 - Pap s - Pha v - Pis s - Sec c_flour - Vac m - Ves v 5,1
Alt a 1 - Amb a 1 - Bet v 1 - Cla h 8 - Cor a 1.0401 - Cry j 1 - Fel d 1,1
Alt a 1 - Ara h 1 - Bet v 2 - Cuc m 2 - Hev b 8 - Phl p 12 - Pho d 2,1
Alt a 1 - Amb a 1 - Bet v 1 - Cor a 1.0103 - Cor a 1.0401 - Der f 1 - Der f 2 - Der p 1 - Der p 2 - Fag s 1 - Fel d 1 - Fra a 1+3 - Lep d 2 - Mal d 1,1
Alt a 1 - Phl p 1,1
Act d 2 - All s - Amb a - Amb a 1 - Art v 1 - Ber e - Bet v 6 - Can f 6 - Can f_Fd1 - Cla h - Cor a 1.0103 - Cry j 1 - Fel d 1 - Fel d 4 - Rat n - Urt d,1
Aca s - Ach d - Ama r - Amb a - Amb a 1 - Ani s 3 - Ara h 15 - Ara h 6 - Arg r 1 - Asp f 4 - Bet v 1 - Blo t 10 - Can f 2 - Can f_male urine - Che q - Chi spp. - Cry j 1 - Cyn d - Der f 1 - Der f 2 - Der p 1 - Der p 10 - Der p 2 - Der p 23 - Der p 5 - Equ c_milk - Fag s 1 - Fel d 1 - Gly d 2 - Hom g - Lep d 2 - Lit s - Loc m - Lol spp. - Mala s 6 - Myt e - Ost e - Pan b - Pen m 1 - Per a - Per a …
Act d 2 - All s - Aln g 1 - Alt a 1 - Amb a - Amb a 1 - Amb a 4 - Ani s 3 - Ara h 1 - Art v - Art v 1 - Bet v 1 - Bla g 4 - Bla g 5 - Car p - Cla h - Cla h 8 - Der f 1 - Der p 1 - Der p 23 - Fag s 1 - Fel d 1 - Gal d 4 - Gly m 5 - Gly m 6 - Hev b 6.02 - Jug r 1 - Mala s 6 - Pap s - Par j 2 - Per a 7 - Phl p 2 - Pis v 1 - Pru p 3 - Tyr p,1
Amb a - Amb a 1 - Can f_Fd1 - Clu h - Clu h 1 - Cor a 8 - Cyp c 1 - Fel d 1 - Gad m 1 - Mala s 6 - Sal s - Sal s 1 - Sco s 1 - Thu a 1 - Xip g 1,1
Alt a 1 - Art v 1 - Fel d 1 - Fel d 4 - Phod s 1,1
Act d 2 - Alt a 1 - Art v 1 - Jug r_pollen - Phl p 2,1
Alt a 1 - Amb a - Amb a 1 - Api g 1 - Bet v 1 - Cor a 1.0103 - Cor a 1.0401 - Dau c - Dau c 1 - Fag s 1 - Fel d 1 - Fra a 1+3 - Ory c 2 - Pha v - Pop n - Sec c_flour,1
Act d 2 - Alt a 1 - Ama r - Amb a - Amb a 1 - Api g 6 - Api m - Api m 1 - Bla g 4 - Can f_Fd1 - Cry j 1 - Cup a 1 - Cyn d - Cyn d 1 - Fel d 1 - Fic b - Lol p 1 - Par j 2 - Phl p 1 - Phl p 2 - Raj c - Sola l 6 - Zea m - Zea m 14,1
Alt a 1 - Amb a - Amb a 1 - Pha v - Pop n - Sec c_flour - Ten m,1
Alt a 1 - Amb a 1 - Art v - Art v 1 - Car i - Cor a 14 - Cry j 1 - Jug r 2 - Jug r_pollen - Mala s 6 - Phl p 2,1
Act d 2 - Alt a 1 - Amb a - Amb a 1 - Asp f 3 - Can f_Fd1 - Fel d 1 - Lol p 1 - Phl p 1 - Phl p 2,1
Alt a 1 - Asp f 3 - Phl p 2 - Pop n - Vac m,1
Ail a - Alt a 1 - Amb a - Amb a 1 - Amb a 4 - Art v - Art v 1 - Cry j 1 - Cup a 1 - Cup s - Der p 23 - Fel d 1 - Sec c_flour - Sec c_pollen,1
Alt a 1 - Amb a - Amb a 1 - Asp f 6 - Can f 1 - Can f 4 - Can f 6 - Clu h - Clu h 1 - Cry j 1 - Cyp c 1 - Der f 1 - Der f 2 - Der p 1 - Der p 2 - Der p 23 - Fel d 1 - Fel d 4 - Fel d 7 - Gad m - Gad m 1 - Gly d 2 - Lep d 2 - Mala s 11 - Mala s 6 - Raj c Parvalbumin - Sal s - Sal s 1 - Sco s 1 - Thu a 1 - Xip g 1,1
Alt a 1 - Alt a 6 - Amb a - Amb a 1 - Can f 1 - Can f 4 - Can f_Fd1 - Car p - Cyn d - Cyn d 1 - Fel d 1 - Fel d 7 - Gal d 4 - Lol p 1 - Ory c 3 - Par j 2 - Pas n - Phl p 1 - Phl p 2 - Pis s - Pru p 3 - Thu a,1
Alt a 1 - Ama r - Amb a - Amb a 1 - Cla h 8 - Cry j 1 - Mala s 6 - Phl p 2,1
Alt a 1 - Amb a 4 - Art v 1 - Bla g 4 - Der f 2 - Der p 2 - Der p 23 - Mala s 6 - Par j 2 - Phl p 2 - Pis s,1
Aca m - Alt a 1 - Ama r - Amb a - Amb a 1 - Art v - Bet v 2 - Cry j 1 - Cuc m 2 - Equ c 3 - Hev b 8 - Jug r_pollen - Mer a 1 - Pas n - Phl p 12 - Phl p 2 - Pho d 2 - Pop n - Pyr c - Sal k,1
Aca m - Ail a - Alt a 1 - Ama r - Amb a - Amb a 1 - Ara h 1 - Art v - Bet v 2 - Bro pa - Can f 1 - Cap a - Car i - Clu h - Clu h 1 - Cor a 11 - Cry j 1 - Cuc m 2 - Cup a 1 - Cup s - Cyn d - Cyn d 1 - Cyp c 1 - Fag e - Fel d 1 - Fra e - Gad m - Gad m 1 - Hel a - Hev b 8 - Hom s LF - Jug r 2 - Jug r_pollen - Lol p 1 - Lol spp. - Mac inte - Man i - Mer a 1 - Mor r - Mus a - Ory c 3 - Pan m - Pas n -…
Alt a 1 - Amb a - Amb a 1 - Blo t 5 - Can f 6 - Cry j 1 - Cyn d - Cyn d 1 - Der f 1 - Der f 2 - Der p 1 - Der p 2 - Der p 21 - Der p 23 - Der p 5 - Fel d 1 - Gly d 2 - Jug r_pollen - Lep d 2 - Phl p 2 - Tyr p 2,1
Alt a 6 - Mala s 6,1
Ama r - Amb a - Amb a 1 - Bla g 4 - Che a 1 - Cla h - Fel d 1 - Mala s 5 - Par j 2 - Pru p 3 - Sal k - Sal k 1,1
Aca m - Aca s - Ach d - Act d 2 - Alt a 1 - Amb a - Amb a 1 - Amb a 4 - Ani s 3 - Arg r 1 - Art v - Art v 1 - Bet v 1 - Blo t 10 - Blo t 21 - Can f 1 - Can f 4 - Chi spp. - Cuc p - Cyn d - Cyn d 1 - Der p 10 - Gal d 1 - Gly d 2 - Hom g - Lit s - Loc m - Lol p 1 - Lol spp. - Mala s 5 - Mus m 1 - Myt e - Ost e - Pan b - Pen m 1 - Pen m 3 - Per a - Per a 7 - Phl p 1 - Phl p 2 - Rud spp. - Sol spp. -…
All s - Ama r - Amb a - Amb a 1 - Amb a 4 - Api m - Api m 1 - Art v - Art v 1 - Bet v 2 - Can s - Cap a - Car i - Che a - Cic a - Cla h 8 - Cor a 11 - Cry j 1 - Cuc m 2 - Cuc p - Cyn d - Fag e - Fel d 1 - Fic b - Fra e - Fra e 1 - Gad m 1 - Gal d_meat - Gal d_white - Gal d_yolk - Gly m 4 - Gly m 8 - Hel a - Hev b 8 - Hom g - Hom s LF - Jug r 2 - Jug r 6 - Jug r_pollen - Len c - Mer a 1 - Ole e 1 …
Alt a 1 - Art v 1 - Der f 1 - Der f 2 - Der p 1 - Der p 2 - Der p 21 - Der p 23 - Der p 7 - Fel d 1 - Gly d 2 - Lep d 2 - Tyr p,1
Can f 1 - Can f 6 - Can f_Fd1 - Cry j 1 - Der p 5 - Equ c 1 - Fel d 1 - Fel d 4 - Fel d 7 - Gal d 2 - Mala s 11 - Mus m 1 - Pop n - Sal k - Sec c_flour - Vac m,1
Act d 2 - Alt a 1 - Can f 1 - Der p 23 - Fel d 1 - Mala s 6,1
Aca s - Ana o 3 - Api m - Api m 1 - Blo t 21 - Blo t 5 - Cla h 8 - Clu h 1 - Cyn d - Cyn d 1 - Cyp c 1 - Der f 1 - Der f 2 - Der p 1 - Der p 2 - Der p 21 - Der p 23 - Der p 5 - Der p 7 - Fel d 1 - Gad m 1 - Gly d 2 - Hev b 3 - Lep d 2 - Phl p 2 - Sal s 1 - Sco s 1 - Thu a 1 - Tyr p - Tyr p 2 - Ves v 5,1
Aca s - Ach d - Act d 2 - Alt a 1 - Amb a - Amb a 4 - Art v - Art v 1 - Bla g 9 - Chi spp. - Cyn d - Cyn d 1 - Der f 2 - Der p 2 - Der p 20 - Der p 21 - Der p 5 - Der p 7 - Dol spp - Fel d 1 - Fra e - Fra e 1 - Hom g - Jug r_pollen - Lep d 2 - Loc m - Lol p 1 - Ost e - Pan b - Pec spp. - Pen m 2 - Per a - Phl p 1 - Phl p 2 - Rud spp. - Sol spp. - Ten m - Tyr p,1
Alt a 1 - Amb a - Amb a 1 - Asp f 3 - Bet v 2 - Can f 1 - Cuc m 2 - Fel d 1 - Fel d 4 - Hev b 11 - Jug r_pollen - Lol p 1 - Mer a 1 - Phl p 1 - Phl p 12 - Pho d 2 - Vac m,1
Ach d - Alt a 1 - Amb a - Amb a 1 - Art v 1 - Blo t 5 - Der f 2 - Der p 2 - Der p 21 - Der p 23 - Der p 5 - Fel d 1 - Gly d 2 - Lep d 2 - Lol p 1 - Phl p 1 - Phod s 1,1
Aca s - Alt a 1 - Amb a - Amb a 1 - Amb a 4 - Blo t 5 - Cuc p - Der f 2 - Der p 2 - Der p 21 - Der p 23 - Der p 5 - Gly d 2 - Lep d 2 - Phod s 1 - Tyr p - Tyr p 2,1
Aca s - Act d 1 - Aln g 4 - Amb a - Amb a 1 - Amb a 4 - Ana o - Ana o 3 - Api m - Api m 1 - Ara h 2 - Arg r 1 - Art v - Art v 1 - Asp f 6 - Ber e - Bla g 2 - Bla g 4 - Can f 1 - Can f 2 - Can f 3 - Can f 4 - Can f 6 - Can f_male urine - Car i - Clu h - Clu h 1 - Cor a 14 - Cry j 1 - Cyp c 1 - Der f 1 - Der f 2 - Der p 1 - Der p 2 - Der p 23 - Der p 5 - Equ c 1 - Fag s 1 - Fel d 1 - Fel d 4 - Fel …
Alt a 1 - Bla g 4 - Can f_male urine - Der p 23 - Fel d 1 - Myt e - Par j 2 - Phl p 2 - Phl p 5.0101 - Ten m,1
Aca m - Ail a - Alt a 1 - Ama r - Amb a - Amb a 1 - Api g 2 - Art v - Bet v 2 - Can s 3 - Cry j 1 - Cuc m 2 - Cup a 1 - Cup s - Fel d 1 - Fra e - Hev b 8 - Jug r_pollen - Lol p 1 - Mer a 1 - Mor r - Pers a - Phl p 1 - Phl p 12 - Pho d 2 - Phr c - Pla l - Pyr c - Raj c - Sal k - Sec c_pollen - Sol t - Ulm c - Ves v 5,1
Aca s - Asp f 6 - Can f 1 - Der f 2 - Der p 2 - Der p 21 - Der p 23 - Der p 5 - Der p 7 - Fel d 1 - Fel d 7 - Gly d 2 - Lep d 2 - Mala s 11 - Pha v - Pla a 1 - Pop n - Sal k 1 - Tyr p - Tyr p 2,1
Alt a 1 - Amb a - Amb a 1 - Amb a 4 - Art v - Art v 1 - Cla h - Cry j 1 - Fel d 1 - Phl p 2 - Phl p 5.0101 - Phl p 6,1
Alt a 1 - Amb a - Amb a 1 - Api g 6 - Bet v 1 - Bet v 2 - Can f_Fd1 - Cry j 1 - Cuc m 2 - Der p 5 - Fag e - Fel d 1 - Hev b 8 - Jug r_pollen - Mer a 1 - Ory c 3 - Pas n - Phl p 1 - Phl p 12 - Pho d 2 - Phod s 1 - Raj c,1
Aca s - Ach d - Act d 2 - Alt a 1 - Ani s 3 - Asp f 3 - Asp f 4 - Blo t 10 - Can f 6 - Can f_Fd1 - Chi spp. - Der p 10 - Der p 23 - Fel d 1 - Hom g - Lit s - Loc m - Lol spp. - Myt e - Ost e - Pan b - Pen m 1 - Per a - Per a 7 - Phl p 2 - Rud spp. - Ten m - Urt d - Vac m,1
Alt a 1 - Amb a - Amb a 1 - Art v - Art v 1 - Cry j 1 - Equ c 3 - Mala s 6 - Phl p 2,1
Alt a 1 - Amb a - Amb a 1 - Art v - Art v 1 - Bla g 2 - Bla g 4 - Can f 1 - Can f_Fd1 - Cla h - Cla h 8 - Der f 2 - Der p 2 - Der p 21 - Fel d 1 - Lep d 2 - Par j 2 - Pen ch - Phl p 2 - Sec c_pollen,1
Alt a 1 - Der f 1 - Der f 2 - Der p 1 - Der p 2 - Der p 21 - Der p 23 - Fra a 1+3 - Gly d 2 - Jug r 3 - Lep d 2 - Mal d 3 - Phl p 2,1
Alt a 6 - Par j 2,1
Bla g 4 - Cla h - Cyn d - Cyn d 1 - Lol p 1 - Par j 2 - Pen ch - Phl p 1 - Pru p 3 - Sac c,1
Alt a 1 - Der f 1 - Der f 2 - Der p 1 - Der p 2 - Der p 23 - Der p 7 - Fel d 1,1
Alt a 1 - Can f_Fd1 - Fel d 1 - Phl p 2 - Pop n,1
Alt a 6 - Amb a - Amb a 1 - Amb a 4 - Art v - Art v 1 - Can f 1 - Cla h - Cla h 8 - Cry j 1 - Fel d 1 - Fel d 7,1
Alt a 1 - Amb a - Amb a 1 - Can f 1 - Can f_Fd1 - Cry j 1 - Der f 1 - Der p 1 - Fel d 1 - Fel d 7 - Phl p 2,1
Amb a 1 - Api m - Api m 1 - Api m 10 - Asp f 3 - Fra a 1+3 - Pen m 3 - Pha v - Phl p 1 - Pop n - Sal k - Sec c_flour - Urt d - Vac m,1
Ach d - Act d 2 - Alt a 1 - Ama r - Amb a - Amb a 1 - Art v - Bet v 2 - Bet v 6 - Bla g 2 - Bla g 4 - Cry j 1 - Cuc m 2 - Cup a 1 - Cyn d 1 - Der f 1 - Der p 1 - Fag e - Hev b 8 - Jug r_pollen - Loc m - Mer a 1 - Myt e - Ory c 2 - Ost e - Pas n - Phl p 12 - Phl p 2 - Pho d 2 - Phod s 1 - Phr c - Pop n - Rud spp. - Ten m,1
Alt a 1 - Cla h - Phl p 2,1
Alt a 1 - Der p 23 - Fel d 1 - Lol p 1 - Phl p 1 - Phl p 2,1
Amb a - Amb a 1 - Asp f 3 - Bla g 4 - Cry j 1 - Cyn d - Cyn d 1 - Lol p 1 - Pas n - Phl p 1 - Sec c_pollen,1
Alt a 1 - Api m - Api m 1,1
Aca m - Ama r - Amb a - Amb a 1 - Amb a 4 - Art v - Art v 1 - Bet v 1 - Bet v 2 - Bos d 6 - Can f 1 - Can f 3 - Can f 4 - Can f 6 - Cap a - Cap h_epithelia - Cry j 1 - Cuc m 2 - Cyn d - Cyn d 1 - Equ c 1 - Equ c 3 - Equ c_meat - Fel d 1 - Fel d 2 - Fel d 4 - Fel d 7 - Fra a 1+3 - Hev b 8 - Hom g - Jug r_pollen - Lol p 1 - Mala s 6 - Mer a 1 - Mus m 1 - Ory_meat - Ovi a_meat - Pas n - Phl p 1 - Ph…
Alt a 1 - Can f_male urine,1
Alt a 1 - Amb a - Amb a 1 - Cla h 8 - Gly m 5 - Ost e - Phl p 2,1
Cla h 8 - Der f 2 - Der p 2 - Sus d 1,1
Alt a 1 - Amb a 1 - Der f 2 - Der p 2 - Lep d 2 - Phl p 2,1
Amb a - Amb a 1 - Cav p 1 - Cla h 8 - Cyn d - Cyn d 1 - Fel d 1 - Lol p 1 - Pap s - Pas n - Phl p 1,1
Act d 1 - Alt a 1 - Amb a - Amb a 1 - Bla g 4 - Can s 3 - Cry j 1 - Phl p 2,1
Alt a 1 - Amb a - Amb a 1 - Art v - Cry j 1 - Cyn d - Cyn d 1 - Fel d 1 - Lol p 1 - Phl p 1 - Phl p 2 - Phl p 5.0101 - Phl p 6,1
Ail a - Alt a 1 - Amb a - Amb a 1 - Amb a 4 - Art v - Art v 1 - Cry j 1 - Cup a 1 - Cyn d - Fel d 1 - Jug r 1 - Jug r_pollen - Phr c - Sec c_pollen,1
Alt a 1 - Asp f 3 - Gal d 3 - Gal d_white - Hom g - Par j 2 - Phl p 2,1
Alt a 1 - Amb a - Amb a 1 - Ani s 3 - Asp f 3 - Bla g 4 - Can f_Fd1 - Cla h - Cry j 1 - Fel d 1 - Fel d 4 - Lol p 1 - Ory c 3 - Par j 2 - Pen ch - Phl p 1 - Phl p 2 - Phl p 7 - Pru av - Sac c,1
Alt a 1 - Amb a 1 - Asp f 3 - Can f 6 - Can f_male urine - Fel d 1 - Fel d 4 - Fel d 7 - Phl p 2,1
Alt a 1 - Amb a - Amb a 1 - Api m - Api m 1 - Api m 10 - Cla h 8 - Mus m 1,1
Amb a - Amb a 1 - Bla g 4 - Blo t 21 - Blo t 5 - Can f 1 - Can f 2 - Can f 3 - Can f 4 - Can f 6 - Can f_male urine - Cla h - Cry j 1 - Cyn d - Cyn d 1 - Der f 1 - Der f 2 - Der p 1 - Der p 2 - Der p 21 - Der p 23 - Der p 5 - Equ c 1 - Fel d 1 - Fel d 4 - Fel d 7 - Gly d 2 - Jug r_pollen - Lep d 2 - Lol p 1 - Mus m 1 - Par j 2 - Pas n - Pen m 3 - Phl p 1 - Pop n - Tyr p,1
Aca m - Act d 1 - Act d 10 - Act d 2 - Ail a - Aln g 1 - Alt a 1 - Amb a - Amb a 1 - Amb a 4 - Api g 2 - Ara h 1 - Ara h 6 - Ara h 9 - Art v - Art v 1 - Art v 3 - Bet v 1 - Bet v 2 - Bet v 6 - Car p - Cla h 8 - Cor a 1.0103 - Cor a 1.0401 - Cor a 8 - Cor a_pollen - Cry j 1 - Cuc m 2 - Cup a 1 - Der f 1 - Der f 2 - Der p 1 - Der p 2 - Equ c 3 - Fag e - Fag s 1 - Fel d 1 - Fra a 1+3 - Gal d_white -…
Act d 1 - Alt a 1 - Amb a - Amb a 4 - Art v - Art v 1 - Fel d 1,1
Ail a - Alt a 1 - Amb a - Amb a 1 - Ana o - Ana o 3 - Asp f 3 - Bet v 2 - Bos d 4 - Can f 1 - Clu h 1 - Cry j 1 - Cuc m 2 - Cup a 1 - Cyp c 1 - Equ c 1 - Fel d 4 - Fel d 7 - Hel a - Hev b 8 - Jug r_pollen - Lol p 1 - Mer a 1 - Pap s - Par j 2 - Phl p 1 - Phl p 12 - Phl p 2 - Pho d 2 - Phod s 1 - Pis v 1 - Pis v 3 - Pla l - Pyr c - Sal s 1 - Sco s 1 - Thu a 1 - Xip g 1,1
Alt a 6 - Amb a 1 - Bla g 4 - Can f 1 - Can f 2 - Can f 6 - Can f_male urine - Fel d 1 - Fel d 4 - Fel d 7 - Lol p 1 - Par j 2 - Phl p 1,1
Act d 2 - Alt a 1 - Amb a - Amb a 1 - Amb a 4 - Art v - Art v 1 - Bet v 2 - Cry j 1 - Cuc m 2 - Fel d 1 - Gad m 1 - Hev b 8 - Jug r_pollen - Mer a 1 - Phl p 12 - Pho d 2,1
Alt a 1 - Amb a - Amb a 1 - Bla g 9 - Can f 4 - Cry j 1 - Der p 20 - Fel d 1 - Phl p 2 - Pis v 4_RUO,1
Alt a 1 - Amb a 1 - Cyn d - Cyn d 1 - Lol p 1 - Phl p 1 - Phl p 2,1
Alt a 1 - Pan b,1
Ach d - Amb a - Amb a 1 - Blo t 5 - Cry j 1 - Der f 1 - Der f 2 - Der p 1 - Der p 2 - Der p 23 - Der p 7 - Fel d 2 - Gly d 2 - Lep d 2 - Lol p 1 - Mala s 5 - Mes a 1_RUO - Myt e - Ory c 3 - Ost e - Phl p 1 - Phod s 1 - Ten m,1
Aca m - Aca s - Ach d - Amb a 1 - Ani s 3 - Bla g 9 - Blo t 10 - Chi spp. - Cla h 8 - Cyn d 1 - Der f 2 - Der p 1 - Der p 10 - Der p 2 - Der p 20 - Der p 21 - Hom g - Lit s - Loc m - Lol p 1 - Lol spp. - Ost e - Pan b - Pen m 1 - Per a 7 - Phl p 1 - Rud spp. - Ten m,1
Alt a 1 - Alt a 6 - Amb a - Amb a 1 - Bet v 2 - Can f_male urine - Cry j 1 - Cuc m 2 - Der p 23 - Hev b 8 - Mer a 1 - Phl p 12 - Phl p 2 - Pho d 2,1
Act d 10 - Alt a 1 - Amb a - Amb a 1 - Bet v 1 - Bet v 2 - Cry j 1 - Cuc m 2 - Cup a 1 - Fel d 1 - Hev b 8 - Jug r_pollen - Mer a 1 - Phl p 12 - Pho d 2 - Zea m 14,1
Alt a 1 - Amb a - Amb a 1 - Cry j 1 - Cyn d - Cyn d 1 - Fel d 1 - Lol p 1 - Phl p 1 - Phl p 2,1
Act d 2 - Alt a 1 - Amb a 1 - Fel d 1 - Phl p 2,1
Alt a 1 - Amb a - Amb a 1 - Can f_Fd1 - Cry j 1 - Cup a 1 - Cyn d - Cyn d 1 - Fel d 1 - Lol p 1 - Phl p 1 - Phl p 2,1
Alt a 1 - Amb a - Amb a 1 - Bla g 4 - Lol p 1 - Par j 2 - Phl p 1 - Phl p 2,1
Act d 2 - Alt a 1 - Art v 1 - Bla g 4 - Cla h - Cla h 8 - Fag e - Fra e - Fra e 1 - Lol p 1 - Ole e 1 - Ory c 3 - Par j 2 - Phl p 1 - Phl p 2 - Pru p 3 - Sac c,1
Api m - Api m 1 - Api m 10 - Mala s 5 - Sal k,1
Alt a 1 - Amb a 1 - Cyn d - Cyn d 1 - Der f 2 - Der p 2 - Equ c 3 - Fel d 1 - Lep d 2 - Lol p 1 - Pas n - Phl p 1 - Phl p 2,1
Act d 2 - Amb a 1 - Gly m 5 - Mala s 6,1
Act d 1 - Alt a 1 - Amb a 1 - Api g 2 - Api m - Api m 10 - Car p - Cla h - Equ c 3 - Fel d 1 - Lup a - Ory c 2 - Par j - Par j 2 - Phl p 2 - Pla a 3,1
Alt a 1 - Can f_Fd1 - Cla h 8 - Fel d 1 - Phl p 2,1
Act d 2 - Alt a 1 - Amb a - Amb a 1 - Ana o - Ana o 3 - Api g 2 - Api g 6 - Ara h 1 - Ara h 9 - Bet v 2 - Bet v 6 - Bla g 4 - Bla g 5 - Bos d_meat - Can f 6 - Can f_male urine - Car i - Cry j 1 - Cuc m 2 - Cup a 1 - Equ c_meat - Fag e 2 - Fel d 1 - Fra a 1+3 - Gly m 5 - Hev b 8 - Hor v - Jug r 1 - Jug r 3 - Jug r_pollen - Lol p 1 - Mal d 3 - Mer a 1 - Ory c 2 - Pan m - Pen m 3 - Pha v - Phl p 1 -…
Alt a 1 - Vac m,1
Alt a 1 - Amb a - Amb a 1 - Amb a 4 - Art v - Art v 1 - Can f_Fd1 - Can f_male urine - Der f 1 - Der f 2 - Der p 1 - Der p 2 - Der p 23 - Fel d 1 - Fel d 4 - Gly d 2 - Jug r_pollen - Lep d 2 - Par j 2 - Phl p 2 - Tyr p 2,1
Act d 2 - Alt a 1 - Art v 1 - Bla g 4 - Blo t 5 - Hev b 3 - Ves v,1
Aca s - Ach d - Alt a 1 - Ani s 3 - Ara h 15 - Ara h 6 - Blo t 10 - Chi spp. - Der p 10 - Hom g - Lit s - Loc m - Lol spp. - Myt e - Ost e - Pan b - Pec spp. - Pen m 1 - Pen m 4 - Per a - Per a 7 - Rud spp. - Sol spp. - Ten m - Tyr p,1
Act d 1 - Act d 5 - All c - All s - Amb a 1 - Ani s 1 - Bla g 1 - Blo t 10 - Blo t 21 - Cla h - Gad m - Hev b 11 - Hev b 3 - Pen m 3 - Phl p 12 - Phr c - Pol d - Pop n - Rat n - Sal k - Sal k 1 - Thu a 1 - Tri a 19 - Tyr p - Ulm c,1
Alt a 1 - Amb a - Amb a 1 - Asp f 3 - Bla g 4 - Cry j 1 - Der f 2 - Der p 2 - Fel d 1 - Lep d 2 - Par j 2 - Phl p 2,1
Ach d - Alt a 1 - Amb a - Amb a 1 - Bet v 2 - Cry j 1 - Cuc m 2 - Cyn d - Cyn d 1 - Fel d 1 - Hev b 8 - Jug r_pollen - Lol p 1 - Mer a 1 - Phl p 1 - Phl p 12 - Phl p 2 - Phl p 5.0101 - Phl p 6 - Pho d 2 - Sec c_pollen,1
Alt a 1 - Der f 1 - Der f 2 - Der p 1 - Der p 2 - Der p 21 - Der p 23,1
Alt a 1 - Amb a - Amb a 1 - Can f_Fd1 - Der f 2 - Der p 1 - Der p 2 - Fel d 1 - Pha v - Phl p 2 - Sol t - Ten m,1
Aca m - All s - Alt a 1 - Ama r - Amb a - Amb a 1 - Ara h 9 - Art v - Art v 3 - Bla g 2 - Can f_Fd1 - Can s 3 - Che a 1 - Cic a - Cla h 8 - Cor a 8 - Der p 23 - Equ c 3 - Fel d 1 - Fra a 1+3 - Fra e - Fra e 1 - Jug r 3 - Mal d 3 - Mala s 6 - Pap s - Per a 7 - Phl p 2 - Pis s - Pop n - Pru p 3 - Sal k - Ses i 1 - Vit v 1 - Zea m 14,1
Act d 2 - Alt a 1 - Amb a - Amb a 1 - Cla h - Cla h 8 - Cyn d - Cyn d 1 - Lol p 1 - Mala s 6 - Pas n - Phl p 1 - Phl p 2,1
Alt a 1 - Amb a 1 - Cry j 1 - Der f 2 - Der p 2 - Der p 23 - Lep d 2,1
Aca s - Alt a 1 - Art v - Art v 1 - Cra c 6 - Der f 1 - Der f 2 - Der p 1 - Der p 2 - Der p 23 - Der p 5 - Jug r_pollen - Tyr p - Ves v - Ves v 5,1
Alt a 1 - Amb a - Amb a 1 - Can f 4 - Cla h - Cla h 8 - Equ c 3 - Fel d 1 - Lol p 1 - Pas n - Phl p 1 - Phl p 2 - Phl p 5.0101 - Phl p 6 - Sec c_pollen,1
Aca m - Alt a 1 - Ama r - Amb a - Amb a 1 - Bet v 2 - Can f_male urine - Cry j 1 - Cuc m 2 - Der p 1 - Equ c 3 - Fel d 1 - Hev b 8 - Jug r_pollen - Mer a 1 - Pas n - Phl p 12 - Phl p 2 - Pho d 2 - Pyr c,1
Ana o 2 - Asp f 1 - Che a 1 - Cla h - Cla h 8 - Cor a 14 - Cyn d 1 - Fag s 1 - Hev b 6.02 - Pec spp. - Pis v 4_RUO - Sin a 1 - Sola l 6,1
Alt a 1 - Amb a - Amb a 1 - Cla h 8 - Pha v - Pla l,1
Amb a - Amb a 1 - Can f 4 - Can f_Fd1 - Cav p 1 - Cry j 1 - Der f 1 - Der f 2 - Der p 1 - Der p 2 - Fel d 1 - Fel d 4 - Mala s 6 - Ory c 1,1
Aca m - Act d 2 - Alt a 1 - Alt a 6 - Ama r - Art v - Art v 1 - Art v 3 - Bet v 1 - Chi spp. - Cla h - Cor a 1.0103 - Cor a 1.0401 - Cor a_pollen - Cry j 1 - Cup a 1 - Cyn d - Cyn d 1 - Fag s 1 - Fra a 1+3 - Fra e - Jug r_pollen - Lol p 1 - Mal d 1 - Mala s 6 - Pas n - Pha v - Phl p 1 - Phl p 2 - Phr c - Pla a 2 - Pol d 5 - Pop n - Sal k - Sal k 1 - Sec c_pollen,1
Alt a 1 - Amb a - Amb a 1 - Ave s - Can f_male urine - Cla h - Cla h 8 - Cor a 14 - Der p 2 - Pha v - Phl p 2 - Phod s 1 - Pop n - Sec c_flour - Tri a 19 - Urt d,1
Alt a 1 - Amb a 1 - Equ c 3 - Fel d 1 - Phl p 2,1
Alt a 1 - Amb a - Amb a 1 - Ara h 15 - Cuc m 2 - Der p 23 - Mala s 6 - Phl p 2 - Pho d 2 - Ten m,1
Alt a 1 - Jug r_pollen,1
Alt a 1 - Ama r - Amb a - Amb a 1 - Amb a 4 - Art v - Art v 1 - Bet v 2 - Che a 1 - Cry j 1 - Cuc m 2 - Der f 2 - Der p 2 - Fel d 1 - Hev b 8 - Jug r_pollen - Lep d 2 - Mer a 1 - Phl p 12 - Pho d 2 - Sal k 1,1
Alt a 1 - Der f 1 - Der f 2 - Der p 1 - Der p 2 - Der p 23 - Fel d 1 - Gly d 2 - Lep d 2 - Tyr p - Tyr p 2 - Vac m,1
Amb a - Amb a 1 - Art v - Art v 1 - Asp f 6 - Der f 1 - Der f 2 - Der p 2 - Lep d 2 - Mala s 11 - Pim a - Thu a,1
Aca s - Alt a 1 - Amb a - Amb a 1 - Bet v 2 - Can f 2 - Can f_male urine - Cry j 1 - Cuc m 2 - Der f 1 - Der f 2 - Der p 1 - Der p 2 - Equ c 1 - Fel d 1 - Fel d 4 - Gly d 2 - Lep d 2 - Lol p 1 - Mala s 5 - Phl p 1 - Phl p 12 - Phl p 2 - Pho d 2 - Tyr p,1
Alt a 1 - Amb a - Amb a 1 - Cla h 8 - Fel d 1 - Phl p 2 - Pop n - Sal k,1
Alt a 1 - Amb a - Amb a 1 - Can f 1 - Can f 4 - Can f_Fd1 - Can f_male urine - Der f 1 - Der p 1 - Fel d 1 - Fel d 7 - Lol p 1 - Pas n - Phl p 1 - Phl p 2 - Pis s,1
Alt a 1 - Amb a - Amb a 1 - Can f 4 - Cry j 1 - Cuc m 2 - Fel d 1 - Lol p 1 - Mer a 1 - Par j 2 - Phl p 1 - Phl p 12 - Phl p 2 - Pho d 2,1
Aca s - Alt a 1 - Amb a - Amb a 1 - Bet v 2 - Cuc m 2 - Der f 2 - Der p 2 - Der p 23 - Der p 7 - Gly d 2 - Hev b 8 - Jug r_pollen - Lep d 2 - Mer a 1 - Phl p 12 - Pho d 2 - Tyr p - Tyr p 2,1
Act d 10 - Act d 2 - Alt a 1 - Amb a - Amb a 1 - Art v - Art v 3 - Bet v 2 - Can f_Fd1 - Cry j 1 - Cuc m 2 - Der f 2 - Der p 2 - Fel d 1 - Fra e - Fra e 1 - Hev b 8 - Jug r_pollen - Lep d 2 - Mer a 1 - Ole e 1 - Pha v - Phl p 12 - Phl p 2 - Pho d 2 - Pop n - Sal k - Sec c_flour - Urt d - Vit v 1,1
Alt a 1 - Amb a - Amb a 1 - Can f 1 - Can f_Fd1 - Che q - Cic a - Cry j 1 - Cyn d - Cyn d 1 - Fel d 1 - Fel d 4 - Fel d 7 - Lol p 1 - Pas n - Phl p 1 - Phl p 2,1
Aca m - Act d 2 - All s - Alt a 1 - Amb a - Amb a 1 - Bet v 2 - Can f 1 - Can f 6 - Can f_male urine - Cry j 1 - Cuc m 2 - Cup a 1 - Cyn d - Cyn d 1 - Der f 1 - Der f 2 - Der p 1 - Der p 2 - Dol spp - Fel d 1 - Hev b 8 - Hom g - Jug r_pollen - Lep d 2 - Lol p 1 - Mer a 1 - Par j 2 - Pas n - Phl p 1 - Phl p 12 - Phl p 2 - Phl p 5.0101 - Phl p 6 - Pho d 2 - Pla a 2 - Sec c_pollen,1
Aca m - Ach d - All s - Ama r - Amb a - Amb a 1 - Art v - Bet v 2 - Bla g 2 - Bla g 4 - Bos d 4 - Bro pa - Can f 6 - Can f_male urine - Cap a - Car i - Cla h - Cla h 8 - Clu h 1 - Cor a 11 - Cry j 1 - Cuc m 2 - Cup a 1 - Cup s - Cyn d - Cyn d 1 - Cyp c 1 - Der f 1 - Der p 1 - Der p 23 - Fag e - Fel d 1 - Fel d 4 - Gad m - Gal d 3 - Gal d_white - Hel a - Hev b 8 - Jug r_pollen - Loc m - Lol p 1 - …
Alt a 1 - Amb a - Amb a 1 - Bla g 9 - Can f_male urine - Cor a 8 - Cry j 1 - Der f 1 - Der f 2 - Der p 1 - Der p 2 - Der p 20 - Der p 21 - Der p 5 - Fel d 1 - Fra a 1+3 - Hom g - Jug r 3 - Mal d 3 - Pen m 2 - Pla a 3 - Pru p 3 - Vit v 1,1
Act d 2 - Alt a 1 - Ama r - Cry j 1 - Cyn d - Cyn d 1 - Lol p 1 - Mala s 6 - Phl p 1,1
Alt a 1 - Amb a - Amb a 1 - Asp f 3 - Can f 1 - Can f_Fd1 - Clu h - Clu h 1 - Cry j 1 - Cyp c 1 - Der f 1 - Der f 2 - Der p 1 - Der p 2 - Der p 21 - Der p 23 - Equ c 1 - Fel d 1 - Fel d 4 - Fel d 7 - Gad m - Gad m 1 - Lep d 2 - Phl p 2 - Phod s 1 - Sal s 1 - Sco s - Sco s 1 - Thu a 1 - Xip g 1,1
Act d 2 - All s - Alt a 1 - Amb a - Amb a 1 - Bet v 1 - Can f 1 - Che q - Cic a - Cor a 1.0103 - Cry j 1 - Cuc m 2 - Cyn d - Cyn d 1 - Der f 2 - Der p 2 - Equ c 3 - Fel d 1 - Fel d 7 - Fic c - Fra a 1+3 - Hev b 8 - Lep d 2 - Lol p 1 - Mala s 6 - Pap s - Pas n - Phl p 1 - Phl p 12 - Phl p 2 - Phl p 5.0101 - Pho d 2 - Phr c - Pis s - Sec c_pollen,1
Alt a 1 - Ama r - Amb a - Amb a 1 - Art v - Art v 1 - Ber e - Can f_male urine - Cry j 1 - Cyn d - Cyn d 1 - Der f 1 - Der f 2 - Der p 1 - Der p 2 - Fel d 1 - Lep d 2 - Lol p 1 - Mac inte - Pas n - Pen m 3 - Phl p 1 - Pla a 2 - Sec c_pollen - Sin - Sin a 1,1
Alt a 1 - Amb a - Amb a 1 - Art v 1 - Bet v 2 - Can f_Fd1 - Can f_male urine - Cry j 1 - Cuc m 2 - Der f 1 - Der f 2 - Der p 1 - Der p 2 - Der p 21 - Der p 23 - Der p 5 - Fel d 1 - Fel d 4 - Gly d 2 - Hev b 8 - Jug r_pollen - Lep d 2 - Mer a 1 - Mes a 1_RUO - Phl p 12 - Pho d 2 - Urt d - Vac m,1
Act d 2 - Alt a 1 - Amb a - Amb a 1 - Amb a 4 - Art v 1 - Can f_Fd1 - Cla h - Cry j 1 - Cyn d - Cyn d 1 - Equ c 3 - Fel d 1 - Lol p 1 - Pas n - Phl p 1 - Phl p 2 - Pol d - Pol d 5,1
Aca s - Ach d - Ani s 3 - Api m 10 - Ara h 6 - Asp f 4 - Blo t 10 - Blo t 5 - Chi spp. - Der p 10 - Der p 20 - Hom g - Lit s - Loc m - Lol spp. - Myt e - Ost e - Pan b - Pec spp. - Pen m 1 - Pen m 3 - Pen m 4 - Per a - Per a 7 - Rud spp. - Ten m - Tyr p - Vac m - Ves v,1
Aca m - Act d 2 - Alt a 1 - Ama r - Amb a - Amb a 1 - Asp f 1 - Bet v 2 - Can f 6 - Can f_Fd1 - Can f_male urine - Cry j 1 - Cuc m 2 - Cyn d - Cyn d 1 - Equ c 1 - Fel d 1 - Fel d 4 - Gal d 2 - Hev b 8 - Jug r_pollen - Lol p 1 - Mer a 1 - Mus m 1 - Ory c 3 - Pas n - Phl p 1 - Phl p 12 - Phl p 2 - Pho d 2 - Phr c - Pla l - Pyr c - Rat n - Sec c_pollen - Urt d,1
Act d 2 - Alt a 1 - Amb a - Amb a 1 - Bet v 2 - Cav p 1 - Clu h 1 - Cry j 1 - Cuc m 2 - Cuc p - Der f 1 - Der f 2 - Der p 1 - Der p 2 - Fel d 1 - Lep d 2 - Mer a 1 - Ory c 1 - Ory c 2 - Ory_meat - Phl p 12 - Phl p 2 - Pho d 2 - Sco s 1 - Sin - Sin a 1 - Thu a 1,1
Alt a 1 - Alt a 6 - Clu h - Clu h 1 - Cyp c 1 - Gad m - Gad m 1 - Pap s - Phl p 2 - Phl p 5.0101 - Phl p 6 - Pis s - Sal s 1 - Sco s 1 - Sec c_pollen - Thu a 1 - Xip g 1,1
Aca m - Aln g 1 - Alt a 1 - Ama r - Amb a - Amb a 1 - Amb a 4 - Art v - Art v 1 - Bet v 1 - Bet v 2 - Bro pa - Can f_Fd1 - Can f_male urine - Can s - Cit s - Cry j 1 - Cuc m 2 - Cup a 1 - Cyn d - Der f 2 - Der p 2 - Fag e - Fag s 1 - Fel d 1 - Fra e - Gly d 2 - Hev b 8 - Hor v - Jug r_pollen - Lep d 2 - Lol p 1 - Mer a 1 - Pas n - Pers a - Pha v - Phl p 1 - Phl p 12 - Phl p 2 - Pho d 2 - Phr c - …
Act d 2 - Alt a 1 - Asp f 3 - Equ c 3 - Fel d 1 - Phl p 2,1
Alt a 1 - Bla g 4 - Can f 1 - Fel d 1 - Fel d 7 - Par j 2,1
Ach d - Act d 2 - Aln g 4 - Alt a 1 - Amb a - Amb a 1 - Amb a 4 - Art v - Art v 1 - Bet v 2 - Blo t 5 - Can f 1 - Can f 4 - Can f 6 - Can f_Fd1 - Can s - Cav p 1 - Chi spp. - Clu h - Clu h 1 - Cry j 1 - Cyn d - Cyp c 1 - Der f 2 - Der p 2 - Der p 20 - Equ c 1 - Fag e - Fel d 1 - Fel d 4 - Gad m - Gad m 1 - Gly d 2 - Hom g - Jug r 2 - Lep d 2 - Loc m - Mus m 1 - Ory c 1 - Ory c 3 - Pan m - Par j 2…
Aca m - Aca s - Ail a - Alt a 1 - Ama r - Amb a - Amb a 1 - Amb a 4 - Art v - Art v 1 - Bet v 1 - Bet v 2 - Can f_male urine - Can s - Cap a - Cav p 1 - Cor a 1.0103 - Cor a 1.0401 - Cry j 1 - Cuc m 2 - Cup a 1 - Cyn d - Cyn d 1 - Der f 1 - Der f 2 - Der p 1 - Der p 2 - Der p 23 - Fel d 1 - Fra e - Fra e 1 - Gly d 2 - Hev b 8 - Jug r_pollen - Lol p 1 - Mer a 1 - Ole e 1 - Ory c 3 - Pas n - Phl p …
Ach d - Amb a - Amb a 1 - Cla h 8 - Cry j 1 - Fel d 1 - Loc m - Lol p 1 - Par j 2 - Phl p 1 - Pla a 2 - Ten m,1
Act d 2 - Alt a 1 - Amb a 1 - Api m 10 - Thu a,1
Ach d - Alt a 1,1
Amb a - Amb a 1 - Asp f 4 - Cry j 1 - Vac m,1
Act d 2 - Alt a 1 - Amb a - Amb a 1 - Bet v 1 - Cyn d - Cyn d 1 - Fag s 1 - Lol p 1 - Pas n - Phl p 1 - Phl p 2,1
Alt a 1 - Amb a 1 - Art v 1 - Cla h 8 - Der f 2 - Der p 2 - Der p 23 - Fel d 1 - Mac inte - Phl p 2 - Pis s,1
Act d 10 - Act d 2 - Alt a 1 - Amb a - Amb a 1 - Ara h 9 - Can f 1 - Can f 4 - Can f 6 - Can f_Fd1 - Can f_male urine - Can s - Can s 3 - Car i - Che q - Cor a 11 - Cor a 8 - Cry j 1 - Cuc p - Equ c 1 - Fag e - Fel d 1 - Fel d 4 - Fel d 7 - Fic c - Fra a 1+3 - Hel a - Hom s LF - Jug r 2 - Jug r 3 - Jug r 6 - Mac inte - Mal d 3 - Pan m - Phl p 2 - Pla a 2 - Pla a 3 - Pop n - Pru du - Pru p 3 - Sec…
Ach d - Alt a 1 - Amb a 1 - Can f_Fd1 - Equ c 3 - Fel d 1 - Gal d_yolk - Mala s 6 - Par j - Par j 2 - Phl p 2 - Pis s,1
Amb a 1 - Cry j 1 - Jug r_pollen - Lol p 1 - Mala s 6 - Pha v - Phl p 1 - Pop n - Sec c_flour - Vac m,1
Ach d - Asp f 1 - Pop n - Ten m,1
Aca m - Act d 10 - Alt a 1 - Ama r - Amb a - Amb a 1 - Amb a 4 - Art v - Art v 3 - Bet v 2 - Can f 6 - Can f_Fd1 - Can f_male urine - Cry j 1 - Cuc m 2 - Cup a 1 - Cyn d - Cyn d 1 - Fel d 1 - Hev b 8 - Jug r_pollen - Mal d 3 - Man i - Mer a 1 - Mor r - Pas n - Phl p 1 - Phl p 12 - Phl p 2 - Pho d 2 - Phr c - Pla l - Pla l 1 - Pop n - Pyr c - Raj c,1
Cla h 8 - Gad m 1,1
Alt a 1 - Amb a - Amb a 1 - Can f_Fd1 - Clu h 1 - Cry j 1 - Cyp c 1 - Fel d 1 - Gad m 1 - Gal d_white - Jug r 4 - Phl p 2 - Sal s 1 - Sco s 1 - Thu a 1,1
Alt a 1 - Amb a - Amb a 1 - Bet v 2 - Cry j 1 - Cuc m 2 - Fel d 1 - Fic c - Hev b 8 - Jug r_pollen - Mer a 1 - Ost e - Phl p 12 - Phl p 2 - Pho d 2 - Pru du - Sus d 1,1
Aca m - Aca s - Act d 10 - All c - Aln g 1 - Aln g 4 - Alt a 1 - Ama r - Amb a - Amb a 1 - Ana o - Api g 1 - Api g 2 - Ara h 9 - Art v - Art v 1 - Art v 3 - Asp f 3 - Ave s - Ber e - Bet v 1 - Bet v 2 - Bet v 6 - Bla g 4 - Can f 1 - Can s 3 - Cap h_milk - Car i - Car p - Che q - Cic a - Cit s - Clu h - Clu h 1 - Cor a 1.0103 - Cor a 1.0401 - Cor a 11 - Cor a 9 - Cor a_pollen - Cry j 1 - Cuc m 2 -…
Alt a 1 - Amb a - Amb a 1 - Amb a 4 - Cla h 8 - Der p 23,1
All s - Alt a 1 - Bla g 4 - Cla h - Cyn d - Cyn d 1 - Der f 1 - Equ c 3 - Fel d 1 - Jug r_pollen - Lol p 1 - Ost e - Par j 2 - Phl p 1 - Phl p 2,1
Aca s - Alt a 1 - Ani s 3 - Blo t 21 - Blo t 5 - Cor a 9 - Cyn d - Cyn d 1 - Der f 1 - Der f 2 - Der p 1 - Der p 2 - Der p 21 - Der p 23 - Der p 5 - Der p 7 - Dol spp - Gly d 2 - Jug r_pollen - Lep d 2 - Ost e - Pop n - Tyr p - Tyr p 2,1
Alt a 1 - Lol spp.,1
Alt a 1 - Amb a - Amb a 1 - Fel d 1 - Mala s 6 - Phl p 2,1
Alt a 1 - Amb a - Amb a 1 - Asp f 3 - Can f_Fd1 - Der f 1 - Der f 2 - Der p 1 - Der p 2 - Der p 23 - Fel d 1 - Gal d 3 - Gal d 4 - Gal d 5 - Gal d_white - Gal d_yolk - Gly d 2 - Lep d 2 - Phl p 2 - Phod s 1,1
Alt a 1 - Amb a - Amb a 1 - Amb a 4 - Bet v 1 - Cry j 1 - Cup a 1 - Der f 1 - Der f 2 - Der p 1 - Der p 2 - Der p 23 - Fag s 1 - Gly d 2 - Lep d 2,1
Amb a - Amb a 1 - Cry j 1 - Mala s 6 - Ory c 3,1
Alt a 1 - Ara h 9 - Art v - Art v 3 - Cor a 8 - Fra a 1+3 - Jug r 3 - Mal d 3 - Phl p 2 - Pla a 3 - Pru p 3 - Vit v 1 - Zea m - Zea m 14,1
Ach d - Alt a 1 - Art v - Art v 1 - Cyn d - Fel d 7 - Fra e 1 - Hom g - Jug r_pollen - Loc m - Per a - Phl p 1 - Sec c_pollen - Ten m - Tyr p,1
Act d 1 - Act d 2 - Alt a 1 - Bos d 6 - Can f 1 - Can f 4 - Car i - Cor a 11 - Cup a 1 - Cyn d - Cyn d 1 - Der f 1 - Der f 2 - Der p 1 - Der p 2 - Equ c 3 - Fel d 1 - Fel d 7 - Hom s LF - Lep d 2 - Lol p 1 - Mac inte - Pan b - Pas n - Phl p 1 - Phl p 2 - Phl p 5.0101 - Phl p 6 - Phr c - Pla a 2 - Sal k - Sec c_pollen,1
Alt a 1 - Amb a - Amb a 1 - Can f 1 - Cry j 1 - Der f 1 - Der p 1 - Fel d 1 - Fel d 7,1
Alt a 1 - Amb a - Amb a 1 - Amb a 4 - Art v 1 - Can f_Fd1 - Cry j 1 - Der f 2 - Der p 2 - Der p 23 - Fel d 1 - Jug r_pollen - Mala s 6,1
Aca s - Alt a 1 - Amb a - Amb a 1 - Amb a 4 - Can f 3 - Can f 6 - Can f_Fd1 - Cry j 1 - Cyn d - Cyn d 1 - Der p 21 - Der p 5 - Equ c 1 - Fel d 1 - Fel d 2 - Fel d 4 - Lol p 1 - Ory c 3 - Pas n - Phl p 1 - Sus d 1 - Tyr p,1
Alt a 1 - Amb a - Amb a 1 - Asp f 3 - Cry j 1 - Fel d 1 - Phl p 2 - Phod s 1 - Vac m,1
Alt a 1 - Alt a 6 - Fel d 1 - Phl p 2,1
Alt a 1 - Art v 1 - Cla h - Cla h 8 - Der p 23 - Equ c 3 - Fel d 1 - Lol p 1 - Phl p 1,1
Aca s - Ach d - Amb a 1 - Ani s 3 - Blo t 10 - Blo t 21 - Can f_Fd1 - Chi spp. - Der p 10 - Der p 21 - Der p 5 - Der p 7 - Fel d 1 - Gly d 2 - Hom g - Lep d 2 - Lit s - Loc m - Lol p 1 - Lol spp. - Mala s 6 - Myt e - Ost e - Pan b - Pen m 1 - Per a - Per a 7 - Phl p 1 - Rud spp. - Ten m - Tyr p 2,1
Alt a 1 - Amb a - Amb a 1 - Amb a 4 - Art v - Art v 1 - Bet v 1 - Can f_male urine - Cla h 8 - Cry j 1 - Cup a 1 - Cyn d - Equ c 1 - Fel d 1 - Phl p 2 - Phr c - Pop n - Sal k - Sec c_pollen - Ulm c,1
Aln g 4 - Alt a 1 - Amb a - Amb a 1 - Bet v 2 - Can f 1 - Can f 2 - Can f 4 - Can f 6 - Can f_Fd1 - Can f_male urine - Cuc m 2 - Der f 1 - Der f 2 - Der p 1 - Der p 2 - Der p 23 - Der p 7 - Equ c 1 - Fel d 1 - Fel d 4 - Fel d 7 - Hev b 8 - Mer a 1 - Phl p 12 - Pho d 2 - Tyr p,1
Act d 2 - Alt a 1 - Amb a - Amb a 1 - Blo t 5 - Cla h 8 - Der f 1 - Der f 2 - Der p 1 - Der p 2 - Der p 5 - Der p 7 - Lep d 2 - Mala s 6,1
Aln g 1 - Alt a 1 - Amb a - Amb a 1 - Ara h 8 - Bet v 1 - Cor a 1.0103 - Cor a 1.0401 - Cor a_pollen - Cry j 1 - Fag s 1 - Fel d 1 - Fra a 1+3 - Lol p 1 - Mal d 1 - Phl p 1 - Phl p 5.0101 - Phl p 6 - Sec c_pollen,1
Act d 10 - Alt a 1 - Amb a - Amb a 1 - Amb a 4 - Api g 2 - Ara h 9 - Art v - Art v 3 - Bet v 1 - Bet v 2 - Cor a 1.0103 - Cor a 1.0401 - Cor a_pollen - Cry j 1 - Cuc m 2 - Cyn d 1 - Fag s 1 - Fel d 1 - Fra a 1+3 - Hev b 8 - Jug r_pollen - Lol p 1 - Mal d 3 - Mer a 1 - Pha v - Phl p 1 - Phl p 12 - Pho d 2 - Pla a 1 - Pla a 3 - Pop n - Pru p 3 - Sal k - Zea m 14,1
Act d 10 - Alt a 1 - Ama r - Amb a - Amb a 1 - Art v - Art v 1 - Art v 3 - Bet v 2 - Cry j 1 - Cuc m 2 - Cyn d 1 - Der p 23 - Fra a 1+3 - Hev b 8 - Jug r 3 - Jug r_pollen - Lol p 1 - Mal d 3 - Mer a 1 - Pas n - Phl p 1 - Phl p 12 - Pho d 2 - Pla a 3 - Pop n - Pyr c,1
Alt a 1 - Amb a - Amb a 1 - Phl p 2 - Pop n - Thu a,1
Act d 2 - Alt a 1 - Bos d_meat - Equ c 3 - Equ c_meat - Ovi a_meat - Phl p 2,1
Alt a 1 - Amb a - Amb a 1 - Asp f 3 - Can f_Fd1 - Can f_male urine - Cry j 1 - Der f 1 - Der f 2 - Der p 1 - Der p 2 - Der p 23 - Fel d 1 - Gly d 2 - Lep d 2 - Myt e - Phl p 2,1
Act d 2 - Alt a 1 - Cyn d - Cyn d 1 - Lol p 1 - Phl p 1 - Phl p 2,1
Aca s - Ail a - Ama r - Amb a - Amb a 1 - Amb a 4 - Api m - Api m 1 - Api m 10 - Art v - Art v 1 - Bet v 2 - Bos d 8 - Bos d_milk - Can f 1 - Can f 3 - Can s - Cap a - Cap h_epithelia - Car i - Car p - Che a - Cic a - Clu h - Clu h 1 - Cor a 11 - Cry j 1 - Cuc m 2 - Cup a 1 - Cyn d - Cyn d 1 - Cyp c 1 - Der f 1 - Der f 2 - Der p 1 - Der p 2 - Der p 23 - Der p 7 - Fel d 2 - Fel d 7 - Gad m - Gad m…
Amb a 1 - Api m - Bos d 8 - Can f_male urine - Clu h - Cyn d - Cyn d 1 - Der f 1 - Der f 2 - Der p 1 - Der p 2 - Der p 21 - Der p 23 - Der p 5 - Lep d 2 - Lol p 1 - Mala s 11 - Phl p 1 - Tyr p,1
Act d 2 - Aln g 1 - Alt a 1 - Alt a 6 - Amb a - Amb a 1 - Ara h 8 - Bet v 1 - Can f 1 - Can f 4 - Can f 6 - Can f_Fd1 - Car p - Cav p 1 - Cla h - Cla h 8 - Cor a 1.0103 - Cor a 1.0401 - Cor a_pollen - Der f 2 - Der p 2 - Equ c 1 - Equ c 3 - Fag e 2 - Fag s 1 - Fel d 1 - Fel d 7 - Fra a 1+3 - Gly d 2 - Gly m 4 - Lep d 2 - Mac i 2S Albumin - Mac inte - Mal d 1 - Mala s 6 - Mus m 1 - Myt e - Ory c 1…
Alt a 1 - Cyn d 1 - Lol p 1 - Phl p 1 - Phl p 2 - Phl p 5.0101 - Phl p 6 - Sec c_pollen,1
Alt a 1 - Amb a - Amb a 1 - Can f 1 - Der p 23 - Equ c_meat - Fel d 1 - Gly m 5 - Ost e - Phl p 2,1
Act d 2 - Alt a 1 - Phl p 2 - Pru p 3,1
Alt a 1 - Thu a,1
Alt a 1 - Blo t 10,1
Alt a 1 - Ten m,1
Alt a 1 - Amb a - Amb a 1 - Can f 2 - Can f 6 - Fel d 1 - Gal d 3 - Gal d_white - Sin - Sin a 1,1
Alt a 1 - Amb a - Amb a 1 - Cry j 1 - Cuc m 2 - Pho d 2 - Pop n,1
Alt a 1 - Thu a - Urt d,1
Aca s - Ach d - Act d 1 - Ama r - Amb a - Amb a 1 - Amb a 4 - Art v - Art v 1 - Bet v 2 - Blo t 21 - Blo t 5 - Can f 1 - Can f 4 - Can f 6 - Can f_Fd1 - Can f_male urine - Can s - Cic a - Cra c 6 - Cuc m 2 - Cyn d - Cyn d 1 - Cyp c 1 - Der f 1 - Der f 2 - Der p 1 - Der p 2 - Der p 21 - Der p 23 - Der p 5 - Der p 7 - Equ c 1 - Fel d 1 - Fel d 2 - Fel d 7 - Gad m 1 - Gal d 3 - Gal d_white - Hev b 3…
Alt a 1 - Amb a - Amb a 1 - Amb a 4 - Bet v 1 - Jug r_pollen - Phl p 5.0101 - Phl p 6 - Sec c_pollen,1
Act d 1 - Alt a 1 - Art v - Art v 1 - Cuc m 2 - Fel d 1 - Mer a 1 - Pho d 2 - Pru p 3,1
Act d 10 - Alt a 1 - Amb a - Amb a 1 - Ara h 9 - Art v - Art v 3 - Can s - Can s 3 - Car p - Cor a 8 - Cuc p - Fel d 1 - Fel d 7 - Fra a 1+3 - Jug r 3 - Mal d 3 - Pap s - Pap s 2S Albumin - Pla a 3 - Pru p 3 - Sola l 6 - Vit v 1 - Zea m - Zea m 14,1
Alt a 1 - Amb a - Amb a 1 - Cry j 1 - Fel d 1 - Sal k 1,1
Alt a 1 - Alt a 6 - Fel d 1 - Gad m 1 - Vac m,1
Alt a 1 - Amb a - Amb a 1 - Der f 2 - Der p 2 - Gly d 2 - Lep d 2,1
Ach d - Alt a 1 - Amb a - Amb a 1 - Amb a 4 - Art v - Art v 1 - Cry j 1 - Cyn d - Cyn d 1 - Der f 2 - Der p 2 - Der p 23 - Der p 5 - Der p 7 - Fel d 1 - Gly d 2 - Loc m - Lol p 1 - Phl p 1 - Ten m,1
Aca s - Ach d - Alt a 6 - Amb a - Amb a 1 - Bla g 9 - Chi spp. - Der p 20 - Der p 23 - Dol spp - Fra e - Hom g - Lep d 2 - Loc m - Ost e - Pan b - Pen m 2 - Per a - Pol d - Pol d 5 - Sol spp. - Ten m - Tri a 19 - Tyr p - Ves v - Ves v 5,1
Aln g 4 - Amb a - Amb a 1 - Amb a 4 - Api m - Api m 1 - Art v - Art v 1 - Bet v 2 - Bla g 4 - Can s - Cap a - Cav p 1 - Cry j 1 - Cuc m 2 - Cyn d - Cyn d 1 - Der f 1 - Der p 1 - Fel d 1 - Gal d 1 - Gal d 2 - Gal d_white - Hev b 8 - Lol p 1 - Mala s 11 - Mer a 1 - Par j - Par j 2 - Pas n - Phl p 1 - Phl p 12 - Phl p 7 - Pho d 2 - Phr c - Pru p 3 - Sac c - Sec c_pollen,1
Act d 2 - Mala s 6 - Tri a 19,1
Bla g 9 - Der f 1 - Der f 2 - Der p 1 - Der p 2 - Der p 20 - Der p 21 - Der p 23 - Gly d 2 - Lep d 2 - Mala s 6,1
Alt a 1 - Der p 21,1
Alt a 1 - Bla g 9 - Cyn d - Cyn d 1 - Der f 1 - Der f 2 - Der p 1 - Der p 2 - Der p 20 - Der p 23 - Jug r_pollen - Lol p 1 - Pas n - Phl p 1 - Phl p 2,1
Ach d - Bet v 6 - Bla g 9 - Blo t 21 - Can f 2 - Can f 4 - Can f 6 - Clu h - Clu h 1 - Cyp c 1 - Der p 20 - Der p 21 - Fel d 1 - Gad m - Gad m 1 - Lol spp. - Mala s 11 - Pen m 2 - Sal s 1 - Sco s 1 - Ten m - Thu a 1 - Xip g 1,1
Alt a 1 - Der f 1 - Der p 1 - Der p 23,1
Alt a 1 - Amb a - Amb a 1 - Api g 6 - Art v - Cry j 1 - Mus a - Pha v - Pop n - Sal k - Sec c_flour - Urt d,1
Aca s - Act d 1 - Amb a - Amb a 1 - Art v - Art v 1 - Bla g 4 - Bos d 6 - Can f 1 - Can f 3 - Can f 6 - Can f_Fd1 - Clu h 1 - Cor a 11 - Cor a 9 - Cry j 1 - Cyp c 1 - Der f 2 - Der p 2 - Der p 21 - Der p 23 - Der p 5 - Equ c 1 - Fel d 1 - Fel d 2 - Fel d 4 - Fel d 7 - Gad m - Gad m 1 - Gal d 1 - Gal d 2 - Gal d 3 - Gal d 5 - Gal d_white - Gly d 2 - Jug r 4 - Lep d 2 - Mus m 1 - Ovi a_meat - Par j…
Asp f 1 - Ves v - Ves v 5,1
Alt a 1 - Amb a - Amb a 1 - Api g 2 - Art v - Art v 3 - Can s 3 - Car i - Cry j 1 - Cup a 1 - Equ c 3 - Fag e - Fic c - Fra a 1+3 - Jug r 3 - Jug r_pollen - Lol p 1 - Mal d 3 - Mus m 1 - Phl p 1 - Phl p 2 - Phod s 1 - Pla a 2 - Pla a 3 - Pop n - Pru p 3 - Vit v 1 - Zea m - Zea m 14,1
Fel d 1 - Lol p 1 - Mala s 11 - Phl p 1,1
Alt a 1 - Amb a - Amb a 1 - Amb a 4 - Can f_male urine - Cyn d 1 - Der f 1 - Der f 2 - Der p 1 - Der p 2 - Der p 21 - Der p 23 - Der p 5 - Der p 7,1
Act d 10 - Act d 2 - Api m 1 - Can f_male urine - Cry j 1 - Cup a 1 - Cup s - Der f 2 - Der p 2 - Der p 23 - Mala s 5 - Ory c 3,1
Cla h 8 - Der f 1 - Der f 2 - Der p 1 - Der p 2 - Der p 23 - Der p 5 - Gad m 1 - Gly d 2 - Lep d 2,1
Act d 2 - Alt a 1 - Fel d 1 - Ost e,1
Act d 2 - Aln g 1 - Alt a 1 - Amb a - Amb a 1 - Amb a 4 - Art v 1 - Bla g 4 - Blo t 10 - Can f 1 - Can f_Fd1 - Der p 5 - Fel d 1 - Fel d 7 - Gly m 5 - Hev b 6.02 - Lol p 1 - Mala s 6 - Per a 7 - Phl p 1 - Phl p 2,1
Alt a 1 - Api m - Api m 1 - Api m 10 - Cuc m 2 - Jug r_pollen - Phl p 2 - Pho d 2,1
Aca m - Act d 2 - All s - Aln g 1 - Alt a 1 - Ama r - Amb a 4 - Ana o 2 - Ana o 3 - Ara h 1 - Ara h 2 - Asp f 1 - Asp f 4 - Bla g 4 - Bla g 5 - Blo t 10 - Bro pa - Can f 4 - Can f_Fd1 - Can f_male urine - Cic a - Cla h 8 - Cor a 1.0103 - Cyn d - Cyn d 1 - Der f 2 - Der p 20 - Der p 21 - Der p 23 - Der p 5 - Der p 7 - Equ c_meat - Fag s 1 - Fel d 7 - Fra a 1+3 - Gly m 4 - Gly m 5 - Hev b 6.02 - Ju…
Alt a 1 - Ana o - Ana o 3 - Bos d 6 - Clu h 1 - Pha v - Pis v 1 - Pop n - Pru du - Sal s 1 - Sco s 1 - Thu a 1 - Xip g 1 - Zea m 14,1
Alt a 1 - Bos d 2 - Bos d 8 - Bos d_milk - Can f 1 - Can f 6 - Can f_Fd1 - Clu h 1 - Equ c 3 - Fel d 1 - Fel d 7 - Phl p 2 - Sal s 1 - Thu a 1 - Xip g 1,1
Aca s - Alt a 1 - Amb a - Amb a 1 - Ara h 1 - Ara h 2 - Ara h 3 - Ara h 6 - Car i - Cry j 1 - Cuc m 2 - Der f 1 - Der f 2 - Der p 1 - Der p 10 - Der p 2 - Equ c 1 - Fag e - Fel d 1 - Fel d 4 - Gad m 1 - Gly d 2 - Jug r 2 - Lep d 2 - Lup a - Phl p 12 - Phl p 6 - Pho d 2 - Tri fo - Tyr p,1
Act d 2 - Alt a 1 - Cor a 9 - Equ c 3 - Fel d 1 - Jug r 4 - Phl p 2 - Pru du,1
Alt a 1 - Api m 1 - Phl p 2 - Pop n,1
Aca m - Act d 5 - Ail a - All c - All s - Aln g 1 - Alt a 1 - Ama r - Amb a - Amb a 1 - Amb a 4 - Ana o - Art v - Art v 1 - Ber e - Bet v 1 - Bet v 2 - Bet v 6 - Bro pa - Can f 1 - Can f 6 - Can f_Fd1 - Can f_male urine - Can s - Cap a - Car i - Car p - Che a - Che q - Cic a - Cit s - Cor a 1.0103 - Cor a 1.0401 - Cor a 11 - Cor a_pollen - Cry j 1 - Cuc m 2 - Cuc p - Cup a 1 - Cyn d - Cyn d 1 - D…
Alt a 1 - Bla g 9 - Can f 1 - Can f 4 - Phl p 2 - Pol d 5 - Pop n,1
Alt a 1 - Can f 2 - Fel d 1 - Phl p 2,1
Alt a 1 - Amb a - Amb a 1 - Bet v 2 - Bos d 6 - Can f 1 - Can f 3 - Cuc m 2 - Fel d 1 - Fel d 2 - Fel d 4 - Hev b 8 - Mer a 1 - Ory_meat - Ost e - Phl p 12 - Pho d 2 - Sin - Sin a 1 - Sus d 1 - Sus d_epithelia,1
Alt a 1 - Amb a - Amb a 1 - Art v - Art v 1 - Cry j 1 - Cup a 1 - Ory c 3,1
Aca s - Alt a 1 - Amb a - Amb a 1 - Blo t 10 - Can f_Fd1 - Cry j 1 - Der f 1 - Der f 2 - Der p 1 - Der p 2 - Der p 7 - Fel d 1 - Gly d 2 - Tyr p,1
Amb a - Amb a 4 - Api m - Api m 1 - Asp f 3 - Jug r 6 - Pet c - Sal k - Ves v,1
Alt a 1 - Ana o - Ber e - Cic a - Cor a 11 - Cor a 9 - Equ c 3 - Fag e - Fag e 2 - Fel d 1 - Gal d 3 - Pru du - Ses i - Ses i 1,1
Alt a 1 - Cyn d 1 - Der f 1 - Der p 1 - Jug r_pollen - Phl p 1 - Ves v 5,1
Aln g 1 - Alt a 1 - Ama r - Amb a - Amb a 1 - Amb a 4 - Api g 1 - Ara h 8 - Art v - Art v 1 - Asp f 3 - Bet v 1 - Bet v 2 - Bla g 4 - Cor a 1.0103 - Cor a 1.0401 - Cor a_pollen - Cry j 1 - Cuc m 2 - Cup a 1 - Cyn d - Cyn d 1 - Dau c - Dau c 1 - Fag s 1 - Fra a 1+3 - Hev b 8 - Jug r_pollen - Lol p 1 - Mal d 1 - Mer a 1 - Ory c 3 - Par j 2 - Pas n - Pers a - Phl p 1 - Phl p 12 - Phl p 2 - Pho d 2 -…
Alt a 1 - Api g 2,1
Aln g 1 - Alt a 1 - Amb a - Amb a 1 - Amb a 4 - Bet v 1 - Blo t 5 - Can f_male urine - Cor a 1.0103 - Cor a 1.0401 - Cry j 1 - Der f 1 - Der f 2 - Der p 1 - Der p 2 - Der p 5 - Fag s 1 - Fel d 1 - Lep d 2 - Phl p 5.0101 - Sec c_pollen,1
Aln g 1 - Alt a 1 - Amb a 1 - Api g 1 - Bet v 1 - Can f 1 - Can f 6 - Cor a 1.0103 - Cor a 1.0401 - Cor a_pollen - Cyn d - Cyn d 1 - Dau c 1 - Der f 1 - Der f 2 - Der p 1 - Der p 2 - Fag s 1 - Fel d 1 - Fel d 7 - Fra a 1+3 - Lep d 2 - Lol p 1 - Mal d 1 - Pas n - Phl p 1 - Phl p 2 - Sin a 1 - Urt d,1
Alt a 1 - Amb a - Amb a 1 - Cry j 1 - Fel d 1 - Fel d 4 - Lol p 1 - Phl p 1,1
Act d 2 - Aln g 1 - Alt a 1 - Amb a - Amb a 1 - Ana o - Ana o 3 - Ara h 8 - Bet v 1 - Can f 1 - Can f 6 - Car i - Cla h 8 - Cor a 1.0103 - Cor a 1.0401 - Cor a_pollen - Cry j 1 - Equ c 1 - Equ c 3 - Fag s 1 - Fel d 1 - Fel d 4 - Fel d 7 - Fra a 1+3 - Fra e - Fra e 1 - Jug r 1 - Jug r 2 - Mal d 1 - Ole e 1 - Ory c 3 - Phl p 2 - Phl p 5.0101 - Pis v 1 - Pop n - Rat n - Sec c_flour - Sec c_pollen - …
Alt a 1 - Phl p 5.0101 - Sec c_pollen,1
Alt a 1 - Amb a - Amb a 1 - Amb a 4 - Art v - Art v 1 - Bet v 1 - Bet v 2 - Cuc m 2 - Cyn d - Cyn d 1 - Der f 2 - Der p 2 - Fag s 1 - Hev b 8 - Lol p 1 - Mer a 1 - Pas n - Pec spp. - Phl p 1 - Phl p 12 - Phl p 2 - Phl p 5.0101 - Phl p 6 - Pho d 2 - Phr c - Pla l - Sec c_pollen,1
Aln g 1 - Alt a 1 - Amb a - Amb a 1 - Asp f 3 - Bet v 1 - Can f_Fd1 - Cor a 1.0103 - Cor a 1.0401 - Cor a_pollen - Cry j 1 - Fag s 1 - Fel d 1 - Fra a 1+3 - Phl p 2,1
Alt a 1 - Amb a 1 - Cla h 8 - Der f 1 - Der p 1 - Fel d 1 - Phl p 2,1
Aca s - Ach d - Art v 1 - Blo t 5 - Can f_Fd1 - Cra c 6 - Cyn d - Cyn d 1 - Cyp c 1 - Der f 1 - Der f 2 - Der p 1 - Der p 2 - Der p 21 - Der p 23 - Der p 5 - Der p 7 - Fel d 1 - Gad m - Gad m 1 - Gly d 2 - Lep d 2 - Lol p 1 - Mala s 5 - Pas n - Phl p 1 - Phl p 7 - Pis v 3 - Raj c Parvalbumin - Sal s 1 - Sco s 1 - Ten m - Thu a 1 - Tyr p - Tyr p 2 - Ves v - Ves v 5 - Xip g 1,1
Ail a - Aln g 1 - Amb a - Amb a 1 - Amb a 4 - Ani s 3 - Api g 1 - Api m 10 - Ara h 8 - Art v - Art v 1 - Bet v 1 - Bet v 2 - Can f_Fd1 - Cor a 1.0103 - Cor a 1.0401 - Cor a_pollen - Cry j 1 - Cuc m 2 - Cup a 1 - Cup s - Dau c - Dau c 1 - Fag s 1 - Fel d 1 - Fra a 1+3 - Gly m 4 - Hev b 8 - Jug r_pollen - Mal d 1 - Mala s 6 - Mer a 1 - Phl p 12 - Phl p 5.0101 - Pho d 2 - Phr c - Sec c_pollen - Ten …
Alt a 1 - Amb a 1 - Can f_Fd1 - Der f 2 - Der p 2 - Fel d 1 - Lep d 2 - Pha v - Phl p 2 - Pop n - Sal k - Sec c_flour,1
Alt a 1 - Cla h 8 - Lol p 1 - Phl p 1 - Phl p 2,1
Aca m - Aca s - Ach d - Act d 1 - Act d 10 - Ail a - All c - All s - Aln g 1 - Alt a 1 - Ama r - Amb a - Amb a 1 - Amb a 4 - Ana o - Ana o 2 - Ana o 3 - Api g 1 - Api g 2 - Api m - Api m 1 - Ara h 1 - Ara h 15 - Ara h 3 - Ara h 8 - Ara h 9 - Art v - Art v 1 - Art v 3 - Ave s - Ber e - Bet v 1 - Bet v 2 - Bet v 6 - Bos d 6 - Bro pa - Can f 1 - Can f 4 - Can f 6 - Can s - Cap a - Cap h_epithelia - …
Aln g 1 - Api g 1 - Art v - Art v 1 - Bet v 1 - Cor a 1.0103 - Cor a_pollen - Dau c - Dau c 1 - Fag s 1 - Gal d 2 - Gal d_white - Lol spp. - Mal d 1 - Mala s 11 - Myt e - Ost e,1
Aln g 1 - Alt a 1 - Amb a - Amb a 1 - Amb a 4 - Api g 1 - Api g 2 - Ara h 8 - Art v - Art v 1 - Bet v 1 - Bet v 2 - Can s - Can s 3 - Cor a 1.0103 - Cor a 1.0401 - Cor a_pollen - Cry j 1 - Cuc m 2 - Cyn d - Cyn d 1 - Dau c 1 - Der f 2 - Der p 2 - Fag s 1 - Fra a 1+3 - Gly m 4 - Lol p 1 - Mal d 1 - Pas n - Phl p 1 - Phl p 5.0101 - Phl p 6 - Pho d 2 - Phr c - Sec c_pollen - Ves v 5,1
Aln g 1 - Alt a 1 - Amb a - Amb a 1 - Bet v 1 - Cor a 1.0103 - Cor a 1.0401 - Cor a_pollen - Cry j 1 - Fag s 1 - Fel d 1 - Fra a 1+3 - Lol p 1 - Mal d 1 - Phl p 1 - Phl p 2 - Pop n,1
Aln g 1 - Alt a 1 - Amb a - Amb a 1 - Api g 1 - Ara h 8 - Bet v 1 - Bla g 4 - Can f 6 - Can f_Fd1 - Cor a 1.0103 - Cor a 1.0401 - Cor a_pollen - Cuc m 2 - Cyn d - Cyn d 1 - Dau c - Dau c 1 - Der f 1 - Der f 2 - Der p 1 - Der p 2 - Der p 23 - Equ c 1 - Fag s 1 - Fel d 1 - Fra a 1+3 - Gly m 4 - Lep d 2 - Lol p 1 - Mal d 1 - Phl p 1 - Phl p 12 - Phl p 5.0101 - Phl p 6 - Pho d 2 - Phr c - Sec c_polle…
Aca m - Alt a 1 - Mala s 6 - Phl p 2,1
Alt a 1 - Amb a - Amb a 1 - Ara h 1 - Bet v 2 - Cry j 1 - Cuc m 2 - Cyn d - Cyn d 1 - Hev b 8 - Jug r_pollen - Lol p 1 - Mer a 1 - Pas n - Phl p 1 - Phl p 12 - Phl p 2 - Phl p 5.0101 - Phl p 6 - Pho d 2 - Sec c_pollen,1
Alt a 1 - Amb a - Amb a 1 - Amb a 4 - Bet v 2 - Can f 1 - Cry j 1 - Cuc m 2 - Cup a 1 - Equ c 1 - Fel d 1 - Fel d 4 - Fel d 7 - Mes a 1_RUO - Ory_meat - Pha v - Phl p 12 - Pho d 2,1
Ana o - Ana o 3 - Ara h 1 - Ara h 2 - Ara h 3 - Ara h 6 - Asp f 6 - Ave s - Bet v 6 - Bos d_milk - Can f 1 - Can f 2 - Car i - Cic a - Cor a 11 - Cor a 14 - Cor a_pollen - Fel d 7 - Gal d 2 - Gal d 3 - Gal d 4 - Gal d 5 - Gal d_meat - Gal d_white - Gal d_yolk - Gly m 6 - Jug r 1 - Jug r 2 - Jug r 4 - Jug r 6 - Lup a - Mac i 2S Albumin - Mac inte - Mala s 11 - Mala s 6 - Mel g - Pap s - Pis v 1 - …
Alt a 1 - Amb a - Amb a 1 - Art v - Art v 1 - Bet v 2 - Cry j 1 - Cuc m 2 - Cup a 1 - Fel d 1 - Fra e - Fra e 1 - Jug r_pollen - Mer a 1 - Ole e 1 - Phl p 12 - Pho d 2,1
Alt a 1 - Amb a - Amb a 1 - Bet v 2 - Cuc m 2 - Phl p 12 - Pho d 2,1
Act d 2 - Alt a 1 - Equ c 3 - Phl p 2,1
Act d 1 - Alt a 1 - Ave s,1
Alt a 1 - Can f 1 - Car i - Clu h 1 - Cor a 9 - Cuc p - Cyp c 1 - Fel d 1 - Fel d 7 - Gad m 1 - Jug r 4 - Pru du - Sal s 1 - Sco s 1 - Thu a 1 - Xip g 1,1
Bla g 5 - Cla h 8 - Der p 23 - Gad m 1 - Vac m - Ves v,1
Aca s - Alt a 1 - Amb a - Amb a 1 - Amb a 4 - Art v - Cla h - Cla h 8 - Cry j 1 - Der f 2 - Der p 2 - Der p 23 - Fel d 1 - Lep d 2 - Mes a 1_RUO - Phl p 2,1
Aln g 1 - Alt a 1 - Amb a - Amb a 1 - Api g 2 - Bet v 1 - Cor a 1.0103 - Cor a 1.0401 - Cor a_pollen - Cry j 1 - Cup a 1 - Cyn d - Cyn d 1 - Fag s 1 - Fel d 1 - Fra a 1+3 - Gly m 4 - Lol p 1 - Mal d 1 - Ost e - Pas n - Phl p 1 - Pol d - Pol d 5 - Raj c,1
Aln g 1 - Amb a - Amb a 1 - Bet v 1 - Bet v 2 - Cla h 8 - Cor a 1.0103 - Cor a 1.0401 - Cor a_pollen - Cuc m 2 - Cyn d - Cyn d 1 - Fel d 1 - Fel d 4 - Gly m 4 - Hev b 8 - Lol p 1 - Mal d 1 - Mer a 1 - Mus m 1 - Ory c 3 - Ost e - Phl p 1 - Phl p 12 - Phl p 2 - Pho d 2,1
Aln g 1 - Alt a 1 - Amb a - Amb a 1 - Art v - Bet v 1 - Bla g 4 - Can f_male urine - Cav p 1 - Cor a 1.0103 - Cor a 1.0401 - Cry j 1 - Cup a 1 - Cup s - Fag s 1 - Fel d 1 - Fra a 1+3 - Lol p 1 - Ory c 3 - Par j 2 - Phl p 1 - Pla l - Pla l 1,1
Alt a 1 - Amb a - Amb a 1 - Cry j 1 - Der f 1 - Der f 2 - Der p 1 - Der p 2 - Der p 23 - Der p 5 - Fel d 1,1
Ail a - Alt a 1 - Amb a - Amb a 1 - Amb a 4 - Api g 2 - Art v - Art v 1 - Bet v 2 - Can s 3 - Che q - Clu h 1 - Cry j 1 - Cuc m 2 - Cup a 1 - Cyp c 1 - Der p 23 - Fel d 1 - Fel d 4 - Fra a 1+3 - Gad m - Gad m 1 - Hev b 8 - Hor v - Jug r 3 - Jug r_pollen - Mala s 6 - Mer a 1 - Mor r - Mus m 1 - Pan m - Pers a - Pha v - Phl p 12 - Pho d 2 - Pla a 2 - Pop n - Pyr c - Raj c - Rat n - Sal k - Sal s 1 …
Aln g 1 - Alt a 1 - Art v - Art v 1 - Asp f 3 - Bet v 1 - Can f 1 - Can f 6 - Can f_male urine - Cor a 1.0401 - Cyn d 1 - Equ c 1 - Fag s 1 - Fel d 1 - Fel d 4 - Fel d 7 - Fra a 1+3 - Mal d 1 - Mes a 1_RUO - Pha v - Phl p 2 - Pop n - Sol t - Ulm c,1
Alt a 1 - Blo t 21 - Can f_male urine - Der f 2 - Der p 2 - Der p 21 - Gly d 2 - Lep d 2,1
Aca s - Ach d - Ani s 3 - Asp f 4 - Blo t 10 - Chi spp. - Der f 1 - Der f 2 - Der p 1 - Der p 10 - Der p 2 - Der p 23 - Gly d 2 - Hom g - Lep d 2 - Lit s - Loc m - Lol spp. - Ost e - Pan b - Pen m 1 - Per a - Per a 7 - Rud spp. - Ten m - Tyr p - Tyr p 2 - Vac m - Ves v 5,1
Act d 10 - All s - Aln g 1 - Amb a - Amb a 1 - Amb a 4 - Art v - Art v 1 - Bet v 1 - Bla g 1 - Can f 1 - Can f 6 - Can f_Fd1 - Can s - Cit s - Clu h 1 - Cor a 1.0103 - Cor a 1.0401 - Cor a_pollen - Cyn d - Cyn d 1 - Fag s 1 - Fel d 1 - Fel d 7 - Fra a 1+3 - Lol p 1 - Mal d 1 - Mala s 6 - Pas n - Phl p 1 - Sal s 1 - Sco s 1 - Sec c_pollen,1
Aln g 1 - Alt a 1 - Amb a - Amb a 1 - Amb a 4 - Art v - Art v 1 - Bet v 1 - Bla g 1 - Bla g 9 - Can f 1 - Can f 2 - Can f 4 - Can f 6 - Can f_male urine - Car i - Clu h - Clu h 1 - Cor a 1.0103 - Cor a 1.0401 - Cor a_pollen - Cry j 1 - Cup a 1 - Cyn d - Cyn d 1 - Cyp c 1 - Der f 1 - Der f 2 - Der p 1 - Der p 2 - Der p 20 - Der p 21 - Der p 23 - Der p 5 - Equ c 1 - Fag s 1 - Fel d 1 - Fel d 4 - Fe…
Aca s - Alt a 1 - Amb a - Amb a 1 - Art v - Art v 1 - Asp f 6 - Blo t 21 - Can f 1 - Can f_male urine - Der f 1 - Der f 2 - Der p 1 - Der p 2 - Der p 21 - Der p 23 - Der p 5 - Fel d 7 - Gly d 2 - Hom g - Jug r_pollen - Mala s 11 - Phl p 2 - Pru p 3 - Tyr p,1
Alt a 1 - Amb a - Amb a 1 - Api m 1 - Bet v 2 - Cuc m 2 - Der p 23 - Fel d 1 - Fra a 1+3 - Hev b 8 - Lol p 1 - Mer a 1 - Phl p 1 - Phl p 12 - Pho d 2 - Phod s 1 - Urt d,1
Alt a 1 - Amb a 1 - Can f 6 - Cyn d - Cyn d 1 - Lol p 1 - Pas n - Phl p 1,1
All s - Amb a 1 - Der f 2 - Der p 1 - Der p 2 - Der p 21 - Der p 23 - Der p 5 - Gly d 2 - Lep d 2 - Mala s 11 - Pen m 3 - Tyr p - Urt d,1
Alt a 1 - Amb a - Amb a 1 - Der f 2 - Der p 2 - Fra e - Fra e 1 - Ole e 1 - Phl p 1,1
Aca s - Alt a 1 - Blo t 21 - Blo t 5 - Der f 1 - Der f 2 - Der p 1 - Der p 2 - Der p 21 - Der p 7 - Gly d 2 - Lep d 2 - Tyr p - Tyr p 2,1
Aca m - All s - Alt a 1 - Ama r - Amb a 4 - Ana o 2 - Ana o 3 - Api m 1 - Ara h 1 - Ara h 2 - Arg r 1 - Asp f 1 - Asp f 4 - Bet v 1 - Bla g 9 - Blo t 10 - Blo t 5 - Bro pa - Can f 4 - Can f_Fd1 - Can s 3 - Car i - Cic a - Cla h - Cla h 8 - Clu h - Cor a 11 - Cup a 1 - Cyn d - Cyn d 1 - Der f 2 - Der p 10 - Der p 2 - Der p 20 - Der p 21 - Der p 23 - Der p 5 - Der p 7 - Equ c 1 - Equ c_meat - Fel d…
Amb a - Amb a 1 - Bla g 9 - Can f_male urine - Car i - Cor a 11 - Cry j 1 - Cup a 1 - Der f 1 - Der f 2 - Der p 1 - Der p 2 - Der p 20 - Der p 7 - Gly d 2 - Hel a - Hom s LF - Jug r 2 - Jug r_pollen - Lep d 2 - Mala s 5 - Par j 2 - Pen m 2 - Phl p 2 - Pla a 2 - Pop n - Tyr p,1
Alt a 1 - Amb a - Amb a 1 - Api g 1 - Bet v 1 - Dau c - Dau c 1 - Fag s 1 - Fel d 1,1
Alt a 1 - Amb a - Amb a 1 - Amb a 4 - Art v 1 - Clu h - Clu h 1 - Cry j 1 - Cyp c 1 - Der f 1 - Der f 2 - Der p 1 - Der p 2 - Der p 23 - Fel d 1 - Fel d 4 - Gad m - Gad m 1 - Gal d 2 - Gal d 4 - Gal d_white - Gly d 2 - Hor v - Lol p 1 - Mus m 1 - Phl p 1 - Sal s - Sal s 1 - Sco s 1 - Sec c_flour - Sin - Sin a 1 - Thu a 1 - Tyr p 2 - Xip g 1,1
Alt a 1 - Fag e 2,1
Alt a 1 - Art v - Art v 1 - Cyn d - Cyn d 1 - Lol p 1 - Mala s 6 - Phl p 1 - Phl p 2,1
Aca s - Asp f 3 - Cor a 14 - Hom g - Ost e - Tyr p,1
Alt a 1 - Amb a - Amb a 1 - Asp f 3 - Bet v 2 - Cry j 1 - Cuc m 2 - Fel d 1 - Hev b 8 - Jug r_pollen - Mer a 1 - Phl p 12 - Phl p 2 - Pho d 2,1
Alt a 1 - Amb a - Amb a 4 - Equ c 1 - Equ c 3 - Fel d 1 - Lol p 1 - Phl p 1 - Phl p 2,1
Alt a 1 - Api m - Api m 1 - Art v - Art v 1 - Cla h 8 - Der f 2 - Der p 2 - Der p 23 - Equ c 3 - Par j 2 - Phl p 2,1
Alt a 1 - Amb a - Amb a 1 - Api m - Api m 1 - Api m 10 - Cry j 1 - Der f 1 - Der f 2 - Der p 1 - Der p 2 - Der p 23 - Gly d 2 - Jug r_pollen - Lep d 2,1
Alt a 1 - Amb a - Amb a 1 - Can f 1 - Can f_male urine - Cry j 1 - Cup a 1 - Cup s - Equ c 3 - Ory c 3 - Phl p 2,1
Alt a 1 - Amb a - Amb a 1 - Art v 1 - Can f 6 - Cry j 1 - Cuc m 2 - Der f 1 - Fel d 1 - Pho d 2 - Sec c_flour,1
Alt a 1 - Amb a - Amb a 1 - Art v - Can f 4 - Can f_Fd1 - Cry j 1 - Fel d 1 - Phl p 2,1
Alt a 1 - Amb a - Amb a 1 - Cry j 1 - Cuc m 2 - Phl p 12 - Pho d 2,1
Aca m - All s - Alt a 1 - Alt a 6 - Ama r - Amb a - Amb a 1 - Cla h - Cla h 8 - Cry j 1 - Cyn d - Cyn d 1 - Equ c 3 - Fel d 1 - Lol p 1 - Mala s 6 - Ost e - Par j 2 - Phl p 1 - Phl p 2 - Pis s - Pop n - Pru p 3 - Sec c_flour - Sec c_pollen,1
Alt a 1 - Amb a - Amb a 1 - Art v 1 - Cry j 1,1
Act d 10 - Aln g 4 - Alt a 1 - Amb a - Amb a 1 - Api g 2 - Api g 6 - Ara h 9 - Art v - Art v 3 - Can f 1 - Can f 2 - Can f 3 - Can f 4 - Can f 6 - Can f_Fd1 - Can s 3 - Car i - Car p - Che q - Clu h - Clu h 1 - Cor a 8 - Cry j 1 - Cyp c 1 - Der p 1 - Equ c 1 - Equ c 3 - Equ c_meat - Fag e - Fag e 2 - Fel d 1 - Fel d 2 - Fel d 4 - Fel d 7 - Fra a 1+3 - Gad m - Gad m 1 - Gad m 2+3 - Jug r 3 - Jug r…
Aca s - Alt a 1 - Amb a 1 - Art v 1 - Blo t 5 - Cyn d - Cyn d 1 - Der f 1 - Der f 2 - Der p 1 - Der p 10 - Der p 2 - Der p 21 - Der p 23 - Der p 5 - Der p 7 - Fel d 1 - Gly d 2 - Lep d 2 - Tyr p,1
Ail a - Alt a 1 - Amb a - Amb a 1 - Cry j 1 - Cup a 1 - Cyn d - Cyn d 1 - Equ c 3 - Fel d 1 - Jug r_pollen - Lol p 1 - Pas n - Phl p 1 - Phl p 2 - Raj c,1
Alt a 1 - Der f 1 - Der f 2 - Der p 1 - Der p 2 - Der p 23 - Fel d 1 - Gly d 2 - Lep d 2 - Tyr p - Tyr p 2,1
Alt a 1 - Cor a 11,1
Amb a - Amb a 1 - Amb a 4 - Art v - Art v 1 - Bet v 1 - Can f 1 - Can f_Fd1 - Cor a 1.0103 - Cor a 1.0401 - Dol spp - Fag s 1 - Fel d 1 - Fra a 1+3 - Hev b 1 - Mala s 11 - Mala s 6 - Phl p 5.0101 - Phl p 6 - Pol d - Pol d 5 - Sec c_pollen,1
Alt a 1 - Ara h 1 - Asp f 3 - Bla g 9 - Cyn d - Cyn d 1 - Gly m 6 - Lol p 1 - Mac i 2S Albumin - Mac inte - Phl p 1 - Phl p 5.0101 - Pol d 5 - Ten m - Ves v 5,1
Alt a 1 - Cup a 1 - Phl p 2,1
Alt a 1 - Amb a - Amb a 1 - Can f 1 - Can f 4 - Can f_Fd1 - Equ c 1 - Fel d 1 - Fel d 7 - Mal d 3 - Phl p 2 - Phl p 5.0101 - Phod s 1 - Pru p 3 - Sec c_pollen - Sola l 6,1
Act d 2 - Alt a 1 - Cry j 1 - Fel d 1 - Phl p 2,1
Alt a 1 - Amb a - Amb a 1 - Amb a 4 - Api m - Api m 1 - Api m 10 - Art v - Art v 1 - Can f 1 - Can f 6 - Can f_Fd1 - Can f_male urine - Cla h 8 - Cry j 1 - Equ c 1 - Fel d 1 - Fel d 2 - Fel d 4 - Fel d 7 - Gad m 1 - Hom s LF - Mus m 1 - Ory c 3 - Ovi a_meat - Pol d - Pol d 5 - Sal k - Sec c_pollen - Sola l - Sus d 1,1
Alt a 1 - Amb a - Amb a 1 - Art v - Can f 6 - Cry j 1 - Cup a 1 - Fel d 1 - Fel d 4 - Fel d 7 - Ost e - Raj c,1
Ail a - Amb a 1 - Asp f 4 - Urt d - Vac m,1
Alt a 1 - Tri a 14 - Vac m,1
Alt a 1 - Amb a - Amb a 1 - Bet v 2 - Can f 1 - Cry j 1 - Cuc m 2 - Der f 1 - Der f 2 - Der p 1 - Der p 2 - Fel d 1 - Hev b 8 - Lep d 2 - Mer a 1 - Ory c 3 - Pap s - Phl p 12 - Phl p 2 - Pho d 2 - Pop n - Sal k,1
Aca m - Ail a - All s - Alt a 1 - Ama r - Amb a - Amb a 1 - Amb a 4 - Art v - Art v 1 - Bet v 2 - Cap a - Cic a - Cit s - Cry j 1 - Cuc m 2 - Cyn d - Cyn d 1 - Fra e - Hev b 8 - Hor v - Jug r_pollen - Lol p 1 - Lol spp. - Mer a 1 - Mus a - Ori v - Ost e - Pas n - Pers a - Phl p 1 - Phl p 12 - Phl p 2 - Pho d 2 - Phr c - Pla l - Pop n - Pyr c - Raj c Parvalbumin - Sal k - Sco s 1 - Sec c_flour - S…
Ach d - Amb a - Amb a 1 - Ana o 2 - Asp f 1 - Can f 4 - Che a 1 - Cla h - Cla h 8 - Cor a 14 - Cry j 1 - Cyn d - Cyn d 1 - Der f 1 - Der f 2 - Der p 1 - Der p 2 - Der p 21 - Der p 23 - Der p 5 - Fag s 1 - Fel d 1 - Gly d 2 - Hev b 6.02 - Lep d 2 - Lol p 1 - Pas n - Phl p 1 - Phl p 2 - Pis v 4_RUO - Sin a 1,1
Alt a 1 - Equ c 3 - Phl p 2,1
Alt a 1 - Amb a - Amb a 1 - Cyn d - Cyn d 1 - Der f 1 - Der f 2 - Der p 1 - Der p 2 - Der p 21 - Der p 23 - Fel d 1 - Fel d 4 - Fel d 7 - Lol p 1 - Ory c 3 - Ost e - Phl p 1 - Phl p 5.0101 - Phl p 6 - Sec c_pollen,1
Alt a 1 - Bos d 6 - Can f 3 - Can f 6 - Can f_Fd1 - Equ c 1 - Fel d 1 - Fel d 2 - Fel d 4 - Fel d 7 - Gal d_white - Mus m 1 - Ost e - Ovi a_meat - Rat n - Sus d 1 - Sus d_epithelia - Ten m,1
Alt a 1 - Amb a - Amb a 1 - Api m 1 - Fel d 1 - Lol p 1 - Phl p 1,1
All s - Alt a 1 - Amb a - Amb a 1 - Bos d 6 - Can f 1 - Can f 2 - Can f 3 - Can f 4 - Can f 6 - Can f_male urine - Cap h_epithelia - Cla h 8 - Cry j 1 - Equ c 1 - Equ c 3 - Equ c_meat - Fel d 1 - Fel d 2 - Fel d 4 - Fel d 7 - Mala s 6 - Ory c 3 - Ory_meat - Phl p 2 - Rat n - Sus d 1 - Sus d_epithelia,1
Alt a 1 - Amb a - Amb a 1 - Art v - Art v 1 - Can f_Fd1 - Der f 2 - Der p 2 - Fel d 1 - Lep d 2 - Mes a 1_RUO,1
Alt a 1 - Amb a - Amb a 1 - Amb a 4 - Cry j 1 - Der f 2 - Der p 2 - Fic c - Fra e 1 - Hev b 11 - Lep d 2 - Tri a aA_TI - Ves v,1
Act d 2 - Alt a 1 - Amb a 1 - Bos d 6 - Cry j 1 - Cup a 1 - Fel d 1 - Fel d 2 - Fel d 4 - Lol p 1 - Phl p 1 - Phl p 2 - Sus d 1,1
Alt a 1 - Cyn d - Cyn d 1 - Der f 1 - Lol p 1 - Phl p 1,1
Alt a 1 - Amb a 1 - Ani s 1 - Ani s 3 - Bla g 1 - Blo t 10 - Can f 2 - Der p 1 - Der p 10 - Fag s 1 - Fel d 2 - Gly m 6 - Hev b 1 - Hev b 5 - Hev b 6.02 - Lit s - Pen m 1 - Per a 7 - Pis v 1 - Pru p 3 - Sus d 1 - Sus d_epithelia - Sus d_meat - Tri a 14,1
Alt a 1 - Der p 21 - Thu a,1
Aca s - Alt a 1 - Amb a - Amb a 1 - Amb a 4 - Cry j 1 - Fel d 1 - Lol p 1 - Phl p 1 - Raj c - Tyr p,1
Alt a 1 - Amb a - Amb a 1 - Der f 2 - Der p 2 - Lol p 1 - Phl p 1,1
Alt a 1 - Art v - Can f_male urine,1
Aca s - Ach d - Alt a 1 - Amb a - Amb a 1 - Chi spp. - Clu h - Clu h 1 - Cry j 1 - Cyn d - Cyn d 1 - Cyp c 1 - Der f 1 - Der f 2 - Der p 1 - Der p 2 - Der p 23 - Der p 5 - Fel d 1 - Fra e 1 - Gad m - Gad m 1 - Gad m 2+3 - Gly d 2 - Hom g - Hor v - Lep d 2 - Loc m - Lol p 1 - Myt e - Per a - Phl p 1 - Phl p 2 - Rud spp. - Sal k - Sal s - Sal s 1 - Sco s 1 - Sec c_flour - Sol spp. - Sus d 1 - Sus d…
Alt a 1 - Blo t 5 - Der f 1 - Der f 2 - Der p 1 - Der p 2 - Der p 21 - Der p 23 - Der p 5 - Der p 7 - Lep d 2,1
Aca m - Act d 2 - Alt a 1 - Ama r - Amb a - Amb a 1 - Bet v 2 - Cuc m 2 - Cup a 1 - Cyn d - Cyn d 1 - Fel d 1 - Hev b 8 - Jug r_pollen - Lol p 1 - Mer a 1 - Pas n - Phl p 1 - Phl p 12 - Pho d 2 - Pyr c - Sal k,1
Alt a 1 - Amb a - Amb a 1 - Art v 1 - Cla h 8 - Der f 2 - Der p 2 - Phl p 2,1
Alt a 1 - Amb a - Amb a 1 - Cyn d 1 - Jug r_pollen - Lol p 1 - Pas n - Phl p 1 - Phl p 2 - Phl p 5.0101 - Phl p 6 - Raj c - Sec c_pollen,1
Bla g 1 - Che a - Cla h 8 - Cup a 1 - Der p 10 - Equ c 4 - Equ c_meat - Gad m 1 - Hev b 11 - Hev b 3 - Lol spp. - Mor r - Ory_meat - Ost e - Thu a - Ves v,1
Act d 2 - Alt a 1 - Amb a - Amb a 1 - Amb a 4 - Art v - Art v 1 - Can f_Fd1 - Cry j 1 - Cuc p - Fel d 1 - Jug r_pollen - Sec c_pollen,1
Alt a 1 - Amb a - Amb a 1 - Bos d 5 - Car i - Der f 1 - Der f 2 - Der p 1 - Der p 2 - Fel d 1 - Gal d 2 - Gal d_white - Jug r 1 - Jug r 2 - Jug r 4 - Jug r 6,1
Aca s - Amb a 1 - Der f 1 - Der f 2 - Der p 1 - Der p 2 - Der p 23 - Der p 5 - Fel d 1 - Lep d 2 - Mala s 6 - Tyr p - Tyr p 2 - Ves v 5,1
Alt a 1 - Amb a 1 - Bos d 4 - Der f 2 - Der p 2 - Der p 23 - Der p 7 - Fel d 1 - Lep d 2 - Tyr p,1
Aca s - Ach d - Alt a 1 - Amb a - Amb a 1 - Bet v 2 - Blo t 21 - Can f_Fd1 - Cra c 6 - Cry j 1 - Cuc m 2 - Der f 1 - Der f 2 - Der p 1 - Der p 2 - Der p 21 - Der p 23 - Der p 5 - Fel d 1 - Gly d 2 - Hev b 8 - Jug r_pollen - Lep d 2 - Mer a 1 - Phl p 12 - Pho d 2 - Tyr p,1
Ana o 2 - Asp f 4 - Can f 4 - Cla h 8 - Cyn d 1 - Der p 20 - Equ c_meat - Ory_meat - Pen m 2 - Phl p 1 - Phl p 12 - Pis v 4_RUO - Sco s - Sco s 1,1
Aca m - Alt a 1 - Amb a - Amb a 1 - Art v - Bet v 1 - Bet v 2 - Can f 1 - Can f 6 - Can f_Fd1 - Can f_male urine - Cuc m 2 - Equ c 3 - Fag e - Fag s 1 - Fel d 1 - Hev b 8 - Jug r_pollen - Mala s 6 - Mer a 1 - Pas n - Pers a - Phl p 12 - Phl p 2 - Pho d 2 - Pop n,1
Ail a - Alt a 1 - Ama r - Amb a - Amb a 1 - Amb a 4 - Art v - Art v 1 - Cry j 1 - Der f 2 - Der p 2 - Fel d 1 - Jug r_pollen - Pop n - Raj c - Sal k,1
Cyn d - Cyn d 1 - Der f 1 - Der f 2 - Der p 1 - Der p 2 - Der p 23 - Der p 5 - Der p 7 - Gly d 2 - Mala s 5,1
Alt a 1 - Can f 3 - Der f 1 - Der p 1 - Fel d 1 - Fel d 2 - Fel d 4 - Jug r_pollen - Lol p 1 - Phl p 1 - Pop n,1
Aca s - Ach d - Amb a - Amb a 1 - Amb a 4 - Ani s 3 - Ara h 15 - Ara h 6 - Arg r 1 - Art v - Art v 1 - Asp f 3 - Asp f 4 - Ave s - Ber e 1 - Blo t 10 - Blo t 5 - Bos d 4 - Can f_Fd1 - Chi spp. - Clu h - Clu h 1 - Cry j 1 - Cyn d - Cyn d 1 - Cyp c 1 - Der f 1 - Der f 2 - Der p 1 - Der p 10 - Der p 2 - Der p 21 - Der p 23 - Der p 5 - Equ c 1 - Equ c 3 - Fel d 1 - Fel d 4 - Gad m - Gad m 1 - Gad m 2…
Alt a 1 - Bla g 4 - Gly m 5,1
Aca s - Alt a 1 - Amb a 1 - Cuc p - Der f 1 - Der f 2 - Der p 1 - Der p 2 - Der p 23 - Gly d 2 - Lep d 2 - Ost e - Phl p 2 - Tyr p,1
Aca s - Alt a 1 - Amb a - Amb a 1 - Blo t 5 - Cry j 1 - Cyn d - Cyn d 1 - Der f 1 - Der f 2 - Der p 1 - Der p 2 - Der p 21 - Der p 23 - Der p 5 - Equ c 3 - Fel d 1 - Gly d 2 - Lep d 2 - Phl p 2 - Tyr p - Tyr p 2,1
Alt a 1 - Art v 3 - Der f 1 - Der f 2 - Der p 1 - Der p 2 - Der p 23 - Fel d 1,1
Act d 2 - All s - Alt a 1 - Cla h 8 - Mala s 6 - Phl p 2,1
Alt a 1 - Fel d 1 - Fel d 7,1
Aca s - Ach d - Ani s 3 - Ara h 6 - Arg r 1 - Asp f 4 - Bla g 9 - Blo t 10 - Bos d 2 - Chi spp. - Cic a - Cla h - Cra c 6 - Cyp c 1 - Der f 1 - Der f 2 - Der p 1 - Der p 10 - Der p 2 - Der p 20 - Der p 23 - Der p 5 - Fel d 2 - Fel d 4 - Gad m 1 - Gly d 2 - Gly m 4 - Hom g - Lep d 2 - Lit s - Loc m - Lol spp. - Mus m 1 - Myt e - Ost e - Pan b - Pec spp. - Pen m 1 - Pen m 2 - Per a - Per a 7 - Phl …
Act d 2 - Alt a 1 - Art v 1 - Fel d 1 - Hor v - Phl p 2,1
Act d 1 - Act d 2 - Asp f 6 - Bos d 6 - Can f 1 - Can f 3 - Can f 6 - Cap h_epithelia - Equ c 1 - Equ c 3 - Equ c_meat - Fel d 1 - Fel d 2 - Fel d 4 - Fel d 7 - Mala s 11 - Mala s 6 - Mus m 1 - Ory_meat - Ovi a_meat - Rat n - Sus d 1 - Sus d_epithelia - Sus d_meat,1
Mala s 11 - Mala s 6 - Par j 2,1
Act d 2 - Alt a 1 - Art v - Art v 1 - Cuc m 2 - Fic c - Ost e - Phl p 2 - Pho d 2,1
Alt a 1 - Amb a - Amb a 1 - Can f 2 - Can f 4 - Can f 6 - Can f_Fd1 - Equ c 1 - Fel d 1,1
Act d 2 - Alt a 1 - Cla h 8 - Fel d 1 - Pap s - Phl p 2,1
Alt a 1 - Der f 1 - Der f 2 - Der p 1 - Der p 2 - Fel d 1 - Lep d 2 - Phl p 1,1
Alt a 1 - Urt d,1
Alt a 1 - Ama r - Asp f 4 - Can f 4 - Cyn d 1 - Der f 2 - Der p 10 - Der p 23 - Equ c_meat - Hev b 3 - Ory_meat - Pen m 2 - Pers a - Pha v - Pis v 4_RUO - Ten m,1
Aca s - Ach d - Alt a 1 - Amb a - Amb a 1 - Ana o 3 - Ani s 3 - Ara h 1 - Ara h 6 - Arg r 1 - Asp f 4 - Bla g 2 - Blo t 10 - Blo t 21 - Bos d 4 - Can f 2 - Can f 6 - Chi spp. - Cla h - Cla h 8 - Cra c 6 - Cuc p - Cyp c 1 - Der f 1 - Der f 2 - Der p 1 - Der p 10 - Der p 2 - Der p 21 - Der p 23 - Der p 5 - Equ c 4 - Fel d 2 - Fel d 4 - Gad m 1 - Gal d 1 - Gal d 2 - Gal d 4 - Gal d_white - Gly d 2 -…
Aca m - Act d 2 - All s - Ama r - Amb a - Amb a 1 - Art v - Art v 1 - Bet v 2 - Bos d 6 - Bro pa - Can f 1 - Can f 6 - Can f_male urine - Car c - Cic a - Cit s - Cla h 8 - Cor a 11 - Cry j 1 - Cuc m 2 - Cup a 1 - Cup s - Equ c 1 - Fag e - Fel d 1 - Fel d 2 - Fel d 4 - Fel d 7 - Fic b - Fra e - Hel a - Hev b 8 - Hom s LF - Jug r 2 - Jug r 6 - Jug r_pollen - Jun a - Mac inte - Mer a 1 - Mor r - Mus…
Aca s - Alt a 1 - Ara h 6 - Blo t 21 - Blo t 5 - Can f 1 - Can f 4 - Cyn d - Cyn d 1 - Der f 2 - Der p 21 - Der p 23 - Der p 5 - Der p 7 - Fel d 1 - Gly d 2 - Lol p 1 - Phl p 1 - Phl p 2 - Tyr p - Tyr p 2,1
Amb a 1 - Ana o 2 - Art v 3 - Asp f 1 - Che a 1 - Cla h - Cla h 8 - Cor a 1.0103 - Cyn d - Cyn d 1 - Der p 5 - Equ c 4 - Fag s 1 - Fra a 1+3 - Hev b 6.02 - Jug r 1 - Mal d 3 - Pis v 4_RUO - Pla l - Pla l 1 - Sin a 1 - Sola l 6,1
Alt a 1 - Amb a 1 - Art v 1 - Bet v 1 - Cry j 1 - Hev b 5 - Sus d_meat - Tyr p 2 - Zea m 14,1
Aca m - Ail a - All s - Alt a 1 - Ama r - Amb a - Amb a 1 - Api m - Api m 10 - Art v 1 - Bet v 2 - Cry j 1 - Cuc m 2 - Cup a 1 - Hev b 8 - Jug r_pollen - Mer a 1 - Par j 2 - Phl p 12 - Phl p 2 - Pho d 2 - Sol spp.,1
Aca m - Ail a - Alt a 1 - Ama r - Amb a - Amb a 1 - Api g 2 - Art v - Bet v 2 - Can s 3 - Cry j 1 - Cuc m 2 - Cup a 1 - Cyn d - Der f 2 - Der p 2 - Der p 23 - Fel d 1 - Gly d 2 - Hev b 8 - Jug r_pollen - Lep d 2 - Man i - Mer a 1 - Pas n - Pers a - Pha v - Phl p 12 - Pho d 2 - Pyr c - Raj c - Sal k - Sec c_pollen,1
Aca s - Cyn d 1 - Der f 1 - Der f 2 - Der p 1 - Der p 2 - Der p 21 - Der p 23 - Der p 5 - Fel d 1 - Gad m 1 - Gly d 2 - Lep d 2 - Mala s 5 - Myt e - Ost e - Tyr p,1
Aln g 1 - Api g 1 - Ara h 8 - Bet v 1 - Blo t 21 - Blo t 5 - Can f_Fd1 - Cav p 1 - Cor a 1.0103 - Cor a 1.0401 - Cor a_pollen - Cry j 1 - Cup a 1 - Cyn d - Cyn d 1 - Dau c - Dau c 1 - Der f 1 - Der f 2 - Der p 2 - Der p 21 - Der p 23 - Der p 5 - Der p 7 - Fag s 1 - Fel d 1 - Fra a 1+3 - Gly m 4 - Jug r_pollen - Lep d 2 - Lol p 1 - Mal d 1 - Mala s 11 - Pas n - Phl p 1 - Phl p 5.0101 - Phl p 6 - P…
Alt a 1 - Asp f 3 - Bet v 1 - Cor a 1.0103 - Fag s 1 - Fra a 1+3 - Mal d 1 - Phl p 2 - Phl p 5.0101 - Pop n - Ves v 5,1
Alt a 1 - Can f 1 - Can f_Fd1 - Der f 1 - Der p 1 - Fel d 1 - Fel d 4 - Fel d 7 - Ovi a_meat - Phl p 1 - Sus d 1,1
Alt a 1 - Amb a - Amb a 1 - Art v - Art v 1 - Asp f 3 - Bet v 2 - Blo t 21 - Can f 1 - Can f 6 - Cry j 1 - Cuc m 2 - Der f 1 - Der f 2 - Der p 1 - Der p 2 - Der p 21 - Der p 5 - Fel d 1 - Fel d 4 - Fel d 7 - Jug r_pollen - Lep d 2 - Mer a 1 - Pha v - Phl p 12 - Phl p 2 - Pho d 2 - Urt d,1
Aln g 1 - Alt a 1 - Bet v 1 - Can f_Fd1 - Cor a 1.0103 - Cyn d 1 - Fag s 1 - Fel d 1 - Lol p 1 - Phl p 1 - Phl p 5.0101 - Phl p 6 - Pla l - Pop n - Sec c_flour - Sec c_pollen,1
Alt a 1 - Amb a - Amb a 1 - Amb a 4 - Art v - Art v 1 - Bet v 1 - Bet v 2 - Can f 1 - Can s - Cic a - Cor a 1.0103 - Cuc m 2 - Cyn d - Der p 23 - Fag s 1 - Hev b 8 - Jug r_pollen - Mer a 1 - Mus a - Par j - Pas n - Phl p 12 - Phl p 2 - Pho d 2 - Phr c - Pla a 2 - Pop n - Sec c_pollen - Ulm c - Ves v - Ves v 5,1
Aca s - Alt a 1 - Art v - Art v 1 - Lol spp. - Myt e - Ost e - Phl p 1 - Phl p 5.0101 - Tyr p - Ves v - Ves v 5,1
Alt a 1 - Art v - Art v 1 - Art v 3 - Bet v 1 - Bet v 2 - Cry j 1 - Cuc m 2 - Cup a 1 - Cyn d - Cyn d 1 - Fel d 1 - Hev b 8 - Lol p 1 - Mer a 1 - Phl p 1 - Phl p 12 - Pho d 2,1
Alt a 1 - Amb a - Amb a 1 - Bet v 1 - Bet v 2 - Can f 1 - Can f 4 - Che a 1 - Cuc m 2 - Der f 1 - Der p 1 - Fel d 1 - Hel a - Hev b 8 - Mer a 1 - Phl p 12 - Pho d 2 - Sec c_flour - Ses i,1
All s - Aln g 1 - Alt a 6 - Amb a - Amb a 1 - Amb a 4 - Api g 1 - Ara h 8 - Art v - Art v 1 - Bet v 1 - Bet v 2 - Bet v 6 - Bla g 4 - Can f 1 - Can f_Fd1 - Can f_male urine - Car p - Che a 1 - Cla h - Cla h 8 - Cor a 1.0103 - Cor a 1.0401 - Cor a_pollen - Cry j 1 - Cuc m 2 - Cyn d - Cyn d 1 - Equ c 1 - Fag s 1 - Fel d 1 - Fel d 7 - Fra a 1+3 - Gal d 4 - Gal d_white - Hev b 8 - Hor v - Jug r_polle…
Aca s - Alt a 1 - Cry j 1 - Der f 1 - Der f 2 - Der p 1 - Der p 2 - Der p 23 - Gly d 2 - Lep d 2 - Tyr p,1
Alt a 1 - Amb a - Amb a 1 - Bet v 2 - Cuc m 2 - Cup a 1 - Hev b 8 - Jug r_pollen - Lol p 1 - Mer a 1 - Pas n - Phl p 1 - Phl p 12 - Pho d 2 - Raj c,1
Alt a 1 - Amb a 1 - Can f 3 - Can f 4 - Can f 6 - Can f_Fd1 - Cap h_epithelia - Equ c 1 - Equ c 3 - Equ c_meat - Fel d 1 - Fel d 2 - Fel d 4 - Gal d 5 - Lol p 1 - Ory c 3 - Ory_meat - Ovi a_meat - Phl p 1 - Sus d 1 - Sus d_epithelia,1
Alt a 1 - Amb a - Amb a 1 - Bet v 2 - Cuc m 2 - Fel d 1 - Hev b 8 - Jug r_pollen - Mer a 1 - Phl p 12 - Pho d 2 - Pop n,1
Aln g 1 - Aln g 4 - Alt a 1 - Ama r - Amb a - Amb a 1 - Amb a 4 - Api g 1 - Ara h 1 - Ara h 2 - Ara h 3 - Ara h 6 - Ara h 8 - Art v - Art v 1 - Art v 3 - Bet v 1 - Bet v 2 - Bos d 4 - Can f 1 - Can f 2 - Can f 4 - Can f 6 - Can f_Fd1 - Can f_male urine - Can s - Can s 3 - Car i - Cor a 1.0103 - Cor a 1.0401 - Cor a_pollen - Cry j 1 - Cuc m 2 - Cuc p - Dau c - Dau c 1 - Equ c 1 - Fag e - Fag s 1 -…
Act d 1 - Act d 10 - Aln g 1 - Alt a 1 - Ama r - Amb a - Amb a 1 - Amb a 4 - Api g 1 - Art v - Art v 1 - Art v 3 - Bet v 1 - Bet v 2 - Cor a 1.0103 - Cor a 1.0401 - Cor a_pollen - Cry j 1 - Cuc m 2 - Dau c - Dau c 1 - Der f 1 - Der f 2 - Der p 1 - Der p 2 - Der p 21 - Der p 23 - Fag s 1 - Fel d 1 - Fra a 1+3 - Gly d 2 - Gly m 4 - Hev b 8 - Jug r_pollen - Lep d 2 - Mal d 1 - Mala s 6 - Mer a 1 - M…
Alt a 1 - Amb a - Amb a 1 - Cyn d - Cyn d 1 - Fel d 1 - Lol p 1 - Pas n - Phl p 1 - Phl p 5.0101 - Sec c_pollen,1
Act d 2 - Alt a 1 - Phl p 2 - Phl p 5.0101 - Phl p 6,1
Alt a 1 - Can f 1 - Cuc p - Fel d 1 - Fel d 7 - Mus m 1 - Phl p 2 - Rat n,1
Amb a - Amb a 1 - Asp f 3 - Blo t 10 - Can f 1 - Can f_Fd1 - Fel d 1 - Fel d 7,1
Ach d - Act d 2 - Aln g 1 - Alt a 1 - Alt a 6 - Amb a - Amb a 1 - Ana o - Ana o 3 - Api g 1 - Ara h 8 - Arg r 1 - Ber e - Bet v 1 - Bet v 2 - Car i - Cor a 1.0103 - Cor a 1.0401 - Cor a 14 - Cor a 9 - Cor a_pollen - Cry j 1 - Cuc m 2 - Cup a 1 - Cyn d - Cyn d 1 - Dau c - Dau c 1 - Fag s 1 - Fel d 1 - Fra a 1+3 - Gly m 4 - Hev b 8 - Jug r 1 - Jug r 2 - Jug r 4 - Jug r 6 - Lol p 1 - Mac inte - Mal …
Alt a 1 - Amb a - Amb a 1 - Amb a 4 - Api m - Api m 10 - Asp f 3 - Bet v 1 - Can f_male urine - Cav p 1 - Cla h 8 - Cor a 1.0103 - Cor a 1.0401 - Cry j 1 - Cyn d - Cyn d 1 - Fag s 1 - Fel d 1 - Fra a 1+3 - Lol p 1 - Mal d 1 - Pas n - Phl p 1 - Phl p 2,1
Aca m - Ach d - Ail a - Aln g 1 - Alt a 1 - Ama r - Amb a - Amb a 1 - Api g 1 - Ara h 8 - Art v - Bet v 1 - Bet v 2 - Cor a 1.0103 - Cor a 1.0401 - Cor a_pollen - Cry j 1 - Cuc m 2 - Cup a 1 - Cyn d - Cyn d 1 - Dau c - Dau c 1 - Fag s 1 - Fel d 1 - Fel d 4 - Fra a 1+3 - Gly m 4 - Hev b 8 - Jug r_pollen - Lol p 1 - Mac inte - Mal d 1 - Man i - Mer a 1 - Mor r - Pas n - Phl p 1 - Phl p 12 - Phl p 2…
Aln g 1 - Alt a 1 - Bet v 1 - Can f 3 - Can f 4 - Can f 6 - Can f_Fd1 - Can f_male urine - Cor a 1.0103 - Der f 2 - Der p 2 - Fag s 1 - Fel d 1 - Fel d 2 - Lep d 2 - Mes a 1_RUO - Sus d 1 - Ves v,1
Aca m - Act d 2 - Ail a - All c - Alt a 1 - Ama r - Amb a - Amb a 1 - Amb a 4 - Art v - Art v 1 - Bet v 2 - Blo t 10 - Bro pa - Cap a - Car p - Che a - Cit s - Cry j 1 - Cuc m 2 - Cuc p - Cup a 1 - Cyn d - Der p 10 - Fag e - Fel d 1 - Fra e - Gly m 8 - Hev b 8 - Hor v - Jug r_pollen - Mer a 1 - Myt e - Pan m - Pas n - Pen m 1 - Per a 7 - Pers a - Phl p 12 - Phl p 2 - Pho d 2 - Phr c - Pla a 2 - P…
Alt a 1 - Amb a - Amb a 1 - Bet v 1 - Can f 1 - Can f 6 - Can f_Fd1 - Can f_male urine - Cav p 1 - Cor a 1.0103 - Cor a 1.0401 - Cry j 1 - Equ c 1 - Fel d 1 - Fel d 4 - Fel d 7 - Fra a 1+3 - Lol p 1 - Mal d 1 - Mus m 1 - Ory c 3 - Phl p 1 - Phod s 1 - Rat n,1
Alt a 1 - Amb a - Amb a 1 - Bet v 1 - Can f_Fd1 - Cor a 1.0103 - Cor a 1.0401 - Fag s 1 - Fel d 1 - Fra a 1+3 - Mal d 1,1
Act d 1 - Act d 10 - Act d 2 - Alt a 1 - Amb a - Amb a 1 - Ana o - Ana o 3 - Api g 2 - Can f 2 - Can f 3 - Can f 4 - Can f 6 - Can f_Fd1 - Can s 3 - Cap a - Cav p 1 - Cic a - Clu h 1 - Cor a 14 - Cor a 8 - Cry j 1 - Cuc m 2 - Cuc p - Fag e - Fel d 1 - Fel d 2 - Fra a 1+3 - Gal d 5 - Mal d 3 - Ole e 7_RUO - Ovi a_meat - Par j 2 - Pha v - Phl p 2 - Pho d 2 - Pis v 1 - Pla a 3 - Pop n - Pru du - Pru…
Alt a 1 - Ana o - Art v 1 - Ber e - Can f 1 - Can f 6 - Car i - Clu h - Clu h 1 - Cor a 11 - Cor a 14 - Cor a 9 - Cyp c 1 - Der f 2 - Der p 2 - Der p 23 - Fag e - Fel d 1 - Fel d 7 - Gad m - Gad m 1 - Hel a - Jug r 1 - Jug r 2 - Jug r 4 - Jug r 6 - Pap s - Phl p 5.0101 - Pru du - Sal s - Sal s 1 - Sco s 1 - Thu a 1 - Xip g 1,1
Aln g 1 - Alt a 1 - Api g 1 - Bet v 1 - Bla g 4 - Bla g 5 - Can f 1 - Cor a 1.0103 - Cor a 1.0401 - Cor a_pollen - Dau c - Dau c 1 - Der f 1 - Der f 2 - Der p 1 - Der p 2 - Der p 23 - Fag s 1 - Fel d 1 - Fel d 7 - Gly d 2 - Lep d 2 - Ory c 3,1
Aln g 1 - Alt a 1 - Amb a - Amb a 1 - Ana o - Ana o 3 - Bet v 1 - Can f_Fd1 - Clu h 1 - Cor a 1.0103 - Cor a 1.0401 - Cor a 8 - Cor a_pollen - Cry j 1 - Cyp c 1 - Dau c - Dau c 1 - Fag s 1 - Fel d 1 - Fra a 1+3 - Lol p 1 - Mal d 1 - Phl p 1 - Phl p 2 - Pop n - Pru p 3 - Sal s 1 - Sco s 1 - Thu a 1 - Urt d - Xip g 1,1
Aln g 1 - Alt a 1 - Bet v 1 - Bos d 2 - Can f 1 - Can f 6 - Can f_Fd1 - Cor a 1.0103 - Der f 1 - Der f 2 - Der p 1 - Der p 2 - Der p 23 - Equ c 1 - Fag s 1 - Fel d 1 - Fel d 4 - Fel d 7 - Jug r 1 - Jug r 4 - Lep d 2 - Mus m 1 - Rat n,1
Ail a - Alt a 1 - Amb a - Amb a 1 - Bet v 2 - Bos d_meat - Can f 6 - Cap a - Cuc m 2 - Equ c_meat - Fel d 4 - Hev b 8 - Mer a 1 - Phl p 12 - Pho d 2 - Pop n - Sec c_flour,1
Alt a 1 - Amb a - Amb a 1 - Bet v 1 - Bet v 2 - Cry j 1 - Cuc m 2 - Fel d 1 - Hev b 8 - Jug r_pollen - Mer a 1 - Phl p 12 - Pho d 2 - Pop n - Raj c - Sal k - Sec c_flour,1
Act d 1 - Amb a 1 - Blo t 21 - Blo t 5 - Cyn d - Cyn d 1 - Der f 1 - Der f 2 - Der p 1 - Der p 2 - Der p 21 - Der p 23 - Der p 5 - Equ c_meat - Fel d 1 - Gal d_meat - Lep d 2 - Lol p 1 - Mala s 6 - Mel g - Ory_meat - Ost e - Ovi a_meat - Pas n - Phl p 1 - Phr c - Sac c - Sal s - Sco s - Thu a - Ves v 5,1
Alt a 1 - Bet v 1 - Can f_male urine - Cuc m 2 - Cyn d - Cyn d 1 - Lol p 1 - Mer a 1 - Pas n - Pha v - Phl p 1 - Phl p 12 - Phl p 2 - Phl p 5.0101 - Phl p 6 - Pho d 2 - Phr c - Pop n - Sec c_flour - Sec c_pollen,1
Aca m - Act d 2 - Aln g 1 - Alt a 1 - Alt a 6 - Ama r - Amb a - Amb a 1 - Api g 1 - Api g 6 - Api m - Api m 1 - Api m 10 - Ara h 8 - Art v - Bet v 1 - Bla g 4 - Can f 1 - Can f 6 - Can f_Fd1 - Can f_male urine - Cla h - Cla h 8 - Cor a 1.0103 - Cor a 1.0401 - Cor a_pollen - Cry j 1 - Cuc p - Cup a 1 - Dau c - Dau c 1 - Der f 1 - Der f 2 - Der p 1 - Der p 2 - Der p 23 - Equ c 1 - Fag s 1 - Fel d 1…
Aln g 1 - Alt a 1 - Bet v 1 - Cor a 1.0103 - Cor a 1.0401 - Cor a_pollen - Cyn d 1 - Der f 1 - Der f 2 - Der p 1 - Der p 2 - Der p 23 - Fag s 1 - Fel d 1 - Fra a 1+3 - Lep d 2 - Lol p 1 - Mal d 1 - Phl p 1 - Pho d 2 - Pol d - Pol d 5 - Ves v - Ves v 5,1
Alt a 1 - Ara h 8 - Bet v 1 - Can f 1 - Cor a 1.0103 - Cor a 1.0401 - Cor a_pollen - Cyn d - Cyn d 1 - Equ c 1 - Fag s 1 - Fel d 1 - Fel d 4 - Fel d 7 - Fra a 1+3 - Gly m 4 - Jug r_pollen - Lol p 1 - Mal d 1 - Ory c 3 - Phl p 1 - Phl p 2 - Pis s - Sec c_pollen - Ves v 5,1
Alt a 1 - Bet v 1 - Can f 3 - Equ c 3 - Fel d 2 - Jug r_pollen - Ovi a_meat - Sus d 1,1
Alt a 1 - Amb a - Amb a 1 - Asp f 3 - Bet v 2 - Clu h - Clu h 1 - Cry j 1 - Cuc m 2 - Cup a 1 - Cyp c 1 - Der f 2 - Der p 2 - Fel d 1 - Gad m - Gad m 1 - Gly d 2 - Hev b 8 - Jug r_pollen - Lep d 2 - Mer a 1 - Phl p 12 - Phl p 2 - Pho d 2 - Pyr c - Raj c - Sal s 1 - Sco s 1 - Thu a 1 - Xip g 1,1
Aca s - Alt a 1 - Art v 1 - Blo t 21 - Cyn d - Cyn d 1 - Der f 1 - Der f 2 - Der p 1 - Der p 2 - Der p 21 - Der p 23 - Der p 5 - Der p 7 - Gly d 2 - Gly m 6 - Lep d 2 - Mala s 5 - Pha v - Phl p 2 - Pop n - Tyr p - Tyr p 2,1
Alt a 1 - Amb a - Amb a 1 - Amb a 4 - Ana o - Api m - Api m 10 - Art v - Art v 1 - Asp f 3 - Can f 1 - Can f 6 - Can f_Fd1 - Can f_male urine - Cry j 1 - Cyn d - Cyn d 1 - Equ c 1 - Fel d 1 - Fel d 4 - Fel d 7 - Lol p 1 - Mes a 1_RUO - Phl p 1,1
Alt a 1 - Amb a 1 - Art v 1 - Der f 1 - Der p 1,1
Alt a 1 - Lol p 1 - Ost e - Phl p 1 - Phl p 2,1
Alt a 1 - Che q - Cic a - Fel d 1 - Pap s - Phl p 2 - Pis s - Pop n - Sec c_flour - Ves v 5,1
Alt a 1 - Bet v 1 - Can f 1 - Cla h 8 - Cor a 1.0103 - Cor a 1.0401 - Fel d 1 - Fel d 7 - Mala s 6 - Ory c 3,1
Aln g 1 - Alt a 1 - Amb a 1 - Art v - Art v 1 - Bet v 1 - Cyn d - Cyn d 1 - Der f 1 - Der f 2 - Der p 1 - Der p 2 - Der p 21 - Der p 23 - Der p 5 - Der p 7 - Fag s 1 - Fel d 1 - Fra a 1+3 - Gly d 2 - Lep d 2 - Lol p 1 - Mal d 1 - Ost e - Pas n - Phl p 1 - Tyr p 2,1
Alt a 1 - Bla g 4 - Cuc m 2 - Par j 2 - Phl p 12 - Phl p 2 - Phl p 5.0101 - Phl p 6 - Pho d 2 - Pla l - Pop n - Pru p 3 - Sec c_pollen,1
Aln g 1 - Alt a 6 - Amb a - Amb a 1 - Amb a 4 - Api g 1 - Art v - Art v 1 - Art v 3 - Bet v 1 - Bet v 2 - Can f 1 - Can f 4 - Can f_Fd1 - Clu h 1 - Cor a 1.0103 - Cor a 1.0401 - Cor a_pollen - Cry j 1 - Cuc m 2 - Cup a 1 - Cyn d - Cyn d 1 - Cyp c 1 - Der f 2 - Der p 2 - Der p 21 - Equ c 3 - Equ c_meat - Fag s 1 - Fel d 1 - Fel d 2 - Fra a 1+3 - Fra e - Fra e 1 - Gly d 2 - Gly m 4 - Jug r 1 - Jug …
All s - Alt a 1 - Cla h 8 - Der f 2 - Der p 2 - Gal d 2 - Lep d 2 - Phl p 2 - Pis s,1
All s - Alt a 1 - Asp f 3 - Cap a - Der p 23 - Fel d 1 - Pha v - Phl p 2 - Pop n - Pru av - Sal k - Sec c_flour - Ses i,1
Ach d - Alt a 1 - Ana o - Ber e - Car i - Che q - Cic a - Cor a 11 - Cor a 9 - Cor a_pollen - Cuc p - Fag e - Gly m 6 - Hel a - Jug r 4 - Len c - Loc m - Lup a - Pap s - Pru du - Ses i - Sin - Ten m - Ves v - Ves v 5,1
Aca s - Ach d - Art v - Art v 1 - Asp f 3 - Blo t 5 - Can f_Fd1 - Cra c 6 - Cyn d 1 - Der f 1 - Der f 2 - Der p 1 - Der p 2 - Der p 21 - Der p 23 - Der p 5 - Der p 7 - Fel d 1 - Gly d 2 - Lep d 2 - Loc m - Mala s 5 - Mes a 1_RUO - Phl p 7 - Ten m - Tyr p,1
Alt a 1 - Bet v 2 - Cuc m 2 - Cyn d - Cyn d 1 - Der f 2 - Der p 2 - Hev b 8 - Lol p 1 - Mer a 1 - Ole e 9 - Pas n - Phl p 1 - Phl p 12 - Phl p 2 - Phl p 5.0101 - Pho d 2 - Sec c_pollen,1
Alt a 1 - Der f 2 - Der p 2 - Der p 21 - Der p 5 - Fel d 1,1
Aln g 1 - Alt a 1 - Amb a 1 - Bet v 1 - Der f 1 - Der f 2 - Der p 1 - Der p 2 - Der p 23 - Der p 7 - Fag s 1 - Gly d 2 - Lep d 2 - Tyr p,1
Aca s - Amb a - Amb a 1 - Blo t 21 - Blo t 5 - Clu h 1 - Cra c 6 - Cry j 1 - Cyn d - Cyn d 1 - Cyp c 1 - Der f 1 - Der f 2 - Der p 1 - Der p 2 - Der p 21 - Der p 23 - Der p 5 - Der p 7 - Gad m - Gad m 1 - Raj c Parvalbumin - Sac c - Sal s 1 - Sco s 1 - Thu a 1 - Tyr p - Xip g 1,1
Alt a 1 - Amb a 1 - Art v - Art v 1 - Can f 1 - Can f 6 - Can f_Fd1 - Cry j 1 - Equ c 1 - Fel d 1 - Fel d 4 - Fel d 7 - Lol p 1 - Phl p 1 - Phl p 5.0101 - Phl p 6,1
Alt a 1 - Bla g 4 - Cav p 1 - Lep d 2 - Par j 2,1
Act d 1 - Alt a 1 - Amb a 1 - Cry j 1 - Cuc m 2 - Der f 1 - Der f 2 - Der p 1 - Der p 2 - Der p 23 - Gal d_white - Gly d 2 - Lep d 2 - Phl p 12 - Pho d 2,1
Aca m - All s - Aln g 1 - Alt a 1 - Alt a 6 - Ama r - Amb a - Amb a 1 - Api g 1 - Bet v 1 - Bet v 2 - Bro pa - Cic a - Cor a 1.0103 - Cor a 1.0401 - Cry j 1 - Cuc m 2 - Cup a 1 - Cyn d - Cyn d 1 - Dau c - Dau c 1 - Fag s 1 - Fra e - Hev b 8 - Jug r_pollen - Len c - Lol p 1 - Mal d 1 - Mala s 6 - Mer a 1 - Pas n - Pers a - Pha v - Phl p 1 - Phl p 12 - Phl p 2 - Phl p 5.0101 - Pho d 2 - Pis s - Pla…
Act d 1 - Aln g 1 - Alt a 1 - Amb a - Amb a 1 - Bet v 1 - Blo t 5 - Bos d 8 - Bos d_milk - Can f 1 - Can f 6 - Can f_Fd1 - Car i - Cor a 1.0103 - Cor a 1.0401 - Cry j 1 - Cyn d - Cyn d 1 - Der f 1 - Der f 2 - Der p 1 - Der p 2 - Der p 21 - Der p 23 - Der p 5 - Der p 7 - Fag s 1 - Fel d 1 - Fel d 4 - Fel d 7 - Gly d 2 - Jug r 1 - Jug r 2 - Jug r_pollen - Lep d 2 - Lol p 1 - Lol spp. - Mal d 1 - My…
Aln g 1 - Alt a 1 - Api g 1 - Bet v 1 - Can f 1 - Cap a - Cor a 1.0103 - Cor a 1.0401 - Cor a_pollen - Der f 1 - Der f 2 - Der p 1 - Der p 2 - Der p 7 - Fag s 1 - Fel d 1 - Fra a 1+3 - Gly d 2 - Gly m 4 - Lep d 2 - Mal d 1 - Pha v - Pop n - Sec c_flour - Ses i,1
Ach d - Alt a 1 - Amb a - Amb a 1 - Bet v 2 - Can f 1 - Cry j 1 - Cuc m 2 - Cyn d - Cyn d 1 - Fra e - Fra e 1 - Hev b 8 - Lol p 1 - Mer a 1 - Pen m 4 - Phl p 1 - Phl p 12 - Pho d 2 - Ten m,1
Alt a 1 - Pha v - Phl p 1 - Pop n,1
Ail a - All s - Alt a 1 - Amb a - Amb a 1 - Bet v 1 - Can f 4 - Cry j 1 - Cuc m 2 - Cup a 1 - Phl p 12 - Phl p 2 - Pho d 2 - Pla a 1 - Pop n,1
Aln g 1 - Alt a 1 - Bet v 1 - Bet v 2 - Can f 2 - Cor a 1.0103 - Cor a 1.0401 - Cor a_pollen - Cuc m 2 - Cyn d - Cyn d 1 - Equ c 3 - Fag s 1 - Fel d 1 - Fra a 1+3 - Hev b 8 - Lol p 1 - Mal d 1 - Mer a 1 - Pas n - Phl p 1 - Phl p 12 - Phl p 2 - Pho d 2 - Phr c - Sec c_pollen,1
Alt a 1 - Amb a - Amb a 1 - Asp f 3 - Bet v 1 - Can f_Fd1 - Fel d 1 - Mal d 1 - Phl p 2,1
Bet v 1 - Cla h 8 - Cor a 1.0103 - Cyn d - Cyn d 1 - Der f 1 - Der f 2 - Der p 1 - Der p 2 - Der p 21 - Der p 23 - Fag s 1 - Fel d 1 - Fel d 7 - Gly d 2 - Gly m 4 - Jug r_pollen - Lep d 2 - Lol p 1 - Pas n - Phl p 1 - Phl p 2 - Phl p 5.0101 - Phr c - Sec c_pollen - Tyr p 2,1
Alt a 1 - Amb a 1 - Der f 1 - Der f 2 - Der p 2 - Equ c 3 - Fel d 1 - Lep d 2 - Lol p 1 - Mala s 6 - Phl p 1 - Phl p 2,1
Aca m - All s - Aln g 1 - Ama r - Amb a - Amb a 1 - Ana o - Ana o 2 - Ana o 3 - Api g 1 - Ara h 1 - Ara h 2 - Ara h 3 - Ara h 6 - Ara h 8 - Arg r 1 - Ave s - Ber e - Ber e 1 - Bet v 1 - Cap a - Car c - Car i - Che q - Cic a - Cor a 1.0103 - Cor a 1.0401 - Cor a 11 - Cor a 14 - Cor a 9 - Cor a_pollen - Cry j 1 - Cuc p - Dau c - Dau c 1 - Fag e - Fag e 2 - Fag s 1 - Fra a 1+3 - Gal d 4 - Gly m 4 - …
Aca m - Ail a - All c - All s - Aln g 1 - Alt a 1 - Ama r - Amb a - Amb a 1 - Amb a 4 - Api g 1 - Ara h 1 - Ara h 8 - Art v - Art v 1 - Ber e - Bet v 1 - Bet v 2 - Bla g 4 - Bro pa - Can f 1 - Can f 6 - Can f_Fd1 - Can f_male urine - Can s - Cap a - Car i - Cav p 1 - Che a - Che q - Cic a - Cla h - Cla h 8 - Cor a 1.0103 - Cor a 1.0401 - Cor a 11 - Cor a_pollen - Cry j 1 - Cuc m 2 - Cuc p - Cup a…
Act d 2 - Aln g 1 - Alt a 1 - Amb a - Amb a 1 - Api g 1 - Ara h 8 - Bet v 1 - Bet v 2 - Can f_male urine - Cor a 1.0103 - Cor a 1.0401 - Cor a_pollen - Cry j 1 - Cuc m 2 - Dau c - Dau c 1 - Der f 1 - Der f 2 - Der p 1 - Der p 2 - Der p 21 - Der p 23 - Der p 5 - Der p 7 - Fag s 1 - Fel d 1 - Fra a 1+3 - Hev b 8 - Jug r_pollen - Lep d 2 - Lol p 1 - Mal d 1 - Mala s 6 - Mer a 1 - Mus m 1 - Phl p 1 -…
Ama r - Api m 10 - Art v 1 - Ave s - Ber e - Cic a - Cla h - Cuc p - Equ c 4 - Fic b - Gly m 6 - Jug r_pollen - Lep d 2 - Mal d 1 - Pers a - Pha v - Phr c - Pop n,1
Alt a 1 - Amb a - Amb a 1 - Bet v 1 - Can f_male urine - Cry j 1 - Cyn d - Cyn d 1 - Der f 1 - Fag s 1 - Fel d 1 - Lol p 1 - Ory c 3 - Phl p 1,1
Ach d - Aln g 1 - Alt a 1 - Amb a - Amb a 1 - Api g 1 - Api m - Api m 10 - Ara h 8 - Art v - Art v 1 - Bet v 1 - Bet v 2 - Bet v 6 - Can f 1 - Clu h 1 - Cor a 1.0103 - Cor a 1.0401 - Cor a_pollen - Cra c 6 - Cry j 1 - Cuc m 2 - Cup a 1 - Dau c - Dau c 1 - Der f 2 - Der p 1 - Der p 2 - Der p 21 - Der p 7 - Fag e - Fag s 1 - Fel d 7 - Fra a 1+3 - Gly m 4 - Hev b 8 - Jug r_pollen - Lep d 2 - Loc m -…
Ach d - Act d 1 - Act d 2 - Alt a 1 - Amb a - Amb a 1 - Ana o 2 - Ani s 3 - Bet v 6 - Bla g 2 - Bla g 4 - Bla g 5 - Bla g 9 - Blo t 10 - Chi spp. - Clu h 1 - Cyn d - Cyn d 1 - Cyp c 1 - Der p 1 - Der p 10 - Der p 20 - Fel d 1 - Gal d 2 - Gal d_white - Hom g - Lit s - Loc m - Lol p 1 - Mala s 6 - Ost e - Pan b - Par j 2 - Pas n - Pen m 1 - Pen m 2 - Per a - Per a 7 - Phl p 1 - Phl p 2 - Phl p 5.01…
Aln g 1 - Alt a 1 - Api g 1 - Ara h 8 - Bet v 1 - Cor a 1.0103 - Cor a 1.0401 - Cor a_pollen - Der f 1 - Der f 2 - Der p 1 - Der p 2 - Der p 23 - Fag s 1 - Fra a 1+3 - Gly d 2 - Gly m 4 - Lep d 2 - Mal d 1 - Phl p 1 - Phl p 2,1
Cla h 8 - Par j 2 - Phl p 1 - Pop n - Sec c_flour,1
Alt a 1 - Amb a - Amb a 1 - Cuc m 2 - Pho d 2,1
Alt a 1 - Amb a - Amb a 1 - Amb a 4 - Art v - Art v 1 - Bet v 1 - Bet v 2 - Cuc m 2 - Cyn d - Cyn d 1 - Fel d 1 - Hev b 8 - Jug r_pollen - Lol p 1 - Mer a 1 - Pas n - Phl p 1 - Phl p 12 - Phl p 2 - Phl p 5.0101 - Phl p 6 - Pho d 2 - Phr c - Sec c_pollen,1
Alt a 1 - Amb a - Amb a 1 - Bet v 1 - Bet v 2 - Can f 1 - Can f_Fd1 - Cor a 1.0103 - Cor a 1.0401 - Cor a_pollen - Cry j 1 - Cuc m 2 - Cup a 1 - Cyn d - Cyn d 1 - Fag s 1 - Fel d 1 - Fel d 7 - Lol p 1 - Mal d 1 - Pha v - Phl p 1 - Phl p 12 - Pho d 2 - Pop n,1
Alt a 1 - Phl p 2 - Pis s,1
Aca m - Act d 10 - All s - Alt a 1 - Alt a 6 - Amb a - Amb a 1 - Amb a 4 - Api g 2 - Api g 6 - Ara h 9 - Art v - Art v 3 - Bet v 1 - Bet v 2 - Bet v 6 - Can f_Fd1 - Can s - Can s 3 - Car i - Cor a 1.0103 - Cor a 1.0401 - Cor a 8 - Cor a_pollen - Cry j 1 - Cuc m 2 - Cup a 1 - Dau c 1 - Fag s 1 - Fel d 1 - Fra a 1+3 - Hev b 8 - Jug r 1 - Jug r 3 - Jug r_pollen - Mal d 1 - Mal d 3 - Mala s 6 - Mer a…
Aca m - Alt a 1 - Ama r - Amb a - Amb a 1 - Art v - Bet v 2 - Bro pa - Can f_male urine - Cap a - Cit s - Cuc m 2 - Equ c 3 - Fra e - Fra e 1 - Hev b 8 - Hor v - Jug r_pollen - Mer a 1 - Mus a - Ole e 1 - Pas n - Pers a - Phl p 12 - Phl p 2 - Pho d 2 - Phr c - Pop n - Pyr c - Sal k - Sec c_flour - Ves v - Ves v 5,1
Aca s - Ama r - Amb a - Amb a 1 - Ani s 3 - Bet v 2 - Blo t 5 - Cry j 1 - Cuc m 2 - Cup a 1 - Cyn d - Cyn d 1 - Der f 1 - Der f 2 - Der p 1 - Der p 2 - Der p 21 - Der p 23 - Der p 5 - Der p 7 - Gly d 2 - Hev b 8 - Jug r_pollen - Lep d 2 - Mala s 6 - Mer a 1 - Pas n - Phl p 12 - Pho d 2 - Tyr p,1
Alt a 1 - Amb a - Amb a 4 - Art v - Art v 1 - Cla h 8 - Der f 1 - Der p 1 - Der p 23 - Fel d 1 - Mes a 1_RUO - Pha v - Phl p 2 - Phr c,1
Aln g 1 - Alt a 1 - Amb a - Amb a 1 - Api g 1 - Ara h 8 - Bet v 1 - Cor a 1.0103 - Cor a 1.0401 - Cor a_pollen - Cuc m 2 - Cyn d - Cyn d 1 - Dau c - Dau c 1 - Der f 2 - Der p 2 - Fag s 1 - Fra a 1+3 - Gly m 4 - Jug r_pollen - Lol p 1 - Mal d 1 - Phl p 1 - Phl p 5.0101 - Phl p 6 - Pho d 2 - Sec c_pollen,1
Aln g 1 - Alt a 1 - Amb a - Amb a 1 - Ara h 8 - Asp f 3 - Bet v 1 - Can f_Fd1 - Cla h - Cla h 8 - Cor a 1.0103 - Cor a 1.0401 - Cor a_pollen - Cry j 1 - Cup a 1 - Fag s 1 - Fel d 1 - Fra a 1+3 - Gly m 4 - Mal d 1 - Phl p 2 - Phod s 1 - Raj c,1
Alt a 1 - Can f 1 - Can f_Fd1 - Der f 1 - Der f 2 - Der p 1 - Der p 2 - Fel d 1 - Fel d 7 - Gly d 2 - Lep d 2 - Pan b,1
Alt a 1 - Amb a - Amb a 1 - Asp f 3 - Can f_Fd1 - Fel d 1 - Fel d 4 - Phl p 2,1
Alt a 1 - Amb a - Amb a 1 - Bet v 2 - Cuc m 2 - Phl p 12 - Pho d 2 - Phod s 1 - Pop n - Sec c_flour,1
Act d 2 - Alt a 1 - Amb a 1 - Art v - Art v 1 - Bet v 2 - Cla h 8 - Cry j 1 - Cuc m 2 - Fel d 1 - Hev b 8 - Jug r_pollen - Lol p 1 - Mer a 1 - Pas n - Phl p 1 - Phl p 12 - Phl p 2 - Pho d 2 - Phod s 1 - Pop n - Sec c_flour - Sec c_pollen - Sola l,1
Alt a 1 - Ana o - Ana o 3 - Art v - Art v 1 - Can f 1 - Can f_Fd1 - Clu h 1 - Cyp c 1 - Fel d 1 - Fel d 7 - Gad m - Gad m 1 - Jug r 1 - Pis v 1 - Pis v 2 - Pis v 3 - Sal s 1 - Sco s 1 - Thu a 1 - Xip g 1,1
Act d 2 - Alt a 1 - Amb a - Amb a 1 - Amb a 4 - Ara h 9 - Art v - Art v 1 - Art v 3 - Bla g 2 - Bla g 4 - Can f 1 - Can f 4 - Can f 6 - Can f_Fd1 - Can f_male urine - Cla h - Cla h 8 - Cyn d - Cyn d 1 - Der f 1 - Fel d 1 - Fel d 7 - Gal d 4 - Gal d_white - Jug r_pollen - Lol p 1 - Mala s 6 - Par j 2 - Pas n - Pers a - Phl p 1 - Phl p 2 - Pru p 3 - Sac c - Sco s 1 - Ten m - Vit v 1 - Zea m - Zea m…
Act d 2 - Aln g 1 - Alt a 1 - Alt a 6 - Ama r - Amb a - Amb a 1 - Api g 1 - Ara h 8 - Bet v 1 - Bet v 2 - Can f_Fd1 - Cor a 1.0103 - Cor a 1.0401 - Cor a_pollen - Cry j 1 - Cuc m 2 - Cyn d - Cyn d 1 - Dau c 1 - Fag e - Fag s 1 - Fel d 1 - Fic c - Fra a 1+3 - Gal d_white - Gly m 4 - Hev b 8 - Jug r_pollen - Lol p 1 - Mal d 1 - Mer a 1 - Pas n - Phl p 1 - Phl p 12 - Phl p 2 - Pho d 2 - Phr c - Sec …
All s - Bla g 4 - Cic a - Cla h 8 - Lol p 1 - Pap s - Par j 2 - Phl p 1 - Pop n - Pru p 3,1
Act d 1 - Act d 2 - Aln g 1 - Alt a 1 - Ama r - Amb a - Amb a 1 - Amb a 4 - Ara h 8 - Art v - Art v 1 - Art v 3 - Bet v 1 - Can f 1 - Can f_male urine - Cic a - Cor a 1.0103 - Cor a 1.0401 - Cor a_pollen - Cry j 1 - Cup a 1 - Cyn d - Cyn d 1 - Der p 23 - Fag s 1 - Fel d 1 - Fra a 1+3 - Fra e - Fra e 1 - Hel a - Jug r 6 - Jug r_pollen - Lol p 1 - Mal d 1 - Par j 2 - Pas n - Phl p 1 - Phl p 5.0101 …
Alt a 1 - Bet v 1 - Cor a 1.0103 - Der f 1 - Der f 2 - Der p 1 - Der p 2 - Der p 23 - Der p 7 - Fag s 1 - Fel d 1 - Fra a 1+3 - Gly d 2 - Lep d 2 - Lol p 1 - Phl p 1 - Phl p 5.0101 - Phl p 6 - Sec c_pollen,1
Alt a 1 - Amb a - Amb a 1 - Cla h 8 - Cyn d - Cyn d 1 - Fel d 1 - Jug r_pollen - Lol p 1 - Phl p 1 - Phl p 5.0101 - Phl p 6 - Sec c_pollen,1
Aln g 1 - Amb a - Amb a 1 - Api g 1 - Art v - Art v 1 - Asp f 6 - Bet v 1 - Bet v 2 - Can f 1 - Can f 4 - Can f 6 - Can f_male urine - Cic a - Cor a 1.0103 - Cor a 1.0401 - Cor a_pollen - Cuc m 2 - Dau c 1 - Equ c 1 - Fag s 1 - Fel d 1 - Fel d 7 - Fra a 1+3 - Hev b 8 - Jug r_pollen - Mal d 1 - Mala s 11 - Mala s 5 - Mer a 1 - Pas n - Phl p 12 - Phl p 5.0101 - Phl p 6 - Pho d 2 - Pis s - Pop n - S…
Aca s - Ach d - Ani s 3 - Blo t 10 - Chi spp. - Cyn d 1 - Der f 1 - Der f 2 - Der p 1 - Der p 10 - Der p 2 - Der p 23 - Der p 5 - Gly d 2 - Gly m 6 - Hom g - Lep d 2 - Lit s - Loc m - Lol spp. - Mala s 5 - Ory c 3 - Pan b - Pen m 1 - Per a 7 - Rud spp. - Ten m,1
Aln g 1 - Art v - Art v 1 - Asp f 6 - Bet v 1 - Can f 1 - Can f 2 - Can f 4 - Can f 6 - Can f_Fd1 - Clu h - Clu h 1 - Cor a 1.0103 - Cor a 1.0401 - Cor a_pollen - Cyp c 1 - Der f 2 - Der p 2 - Equ c 1 - Fag s 1 - Fel d 1 - Fel d 4 - Fel d 7 - Fra a 1+3 - Gad m - Gad m 1 - Mal d 1 - Mala s 11 - Mala s 6 - Myt e - Par j 2 - Raj c Parvalbumin - Sal s - Sal s 1 - Sco s 1 - Sin - Sin a 1 - Thu a 1 - U…
Alt a 1 - Amb a - Amb a 1 - Bet v 2 - Can f_male urine - Cry j 1 - Cuc m 2 - Hev b 8 - Jug r_pollen - Mer a 1 - Phl p 12 - Pho d 2,1
Alt a 1 - Fel d 1 - Lol p 1 - Phl p 1 - Ves v - Ves v 1 - Ves v 5,1
Alt a 1 - Amb a - Amb a 1 - Can f 1 - Cuc m 2 - Fel d 1 - Fel d 7 - Hev b 1 - Phl p 12 - Pho d 2,1
Bet v 1 - Can f 3 - Can f 6 - Can f_Fd1 - Cor a 1.0401 - Equ c 3 - Equ c_meat - Fag s 1 - Fel d 1 - Fel d 2 - Fel d 4 - Fra a 1+3 - Lol p 1 - Mala s 6 - Ory_meat - Ovi a_meat - Phl p 1 - Pol d 5 - Pop n - Sec c_flour - Sus d 1 - Ves v - Ves v 5,1
Aln g 1 - Amb a - Amb a 1 - Amb a 4 - Api g 1 - Ara h 8 - Art v - Art v 1 - Asp f 6 - Bet v 1 - Bos d 6 - Can f 1 - Can f 2 - Can f 3 - Can f 4 - Can f 6 - Can f_male urine - Cap h_epithelia - Cav p 1 - Cor a 1.0103 - Cor a 1.0401 - Cor a 8 - Cor a_pollen - Cry j 1 - Dau c - Dau c 1 - Der p 23 - Equ c 1 - Equ c 3 - Fag s 1 - Fel d 1 - Fel d 2 - Fel d 4 - Fel d 7 - Fra a 1+3 - Gly d 2 - Gly m 4 - …
Alt a 1 - Amb a - Amb a 1 - Amb a 4 - Art v - Art v 1 - Bet v 1 - Bet v 2 - Bla g 4 - Can f_male urine - Cap a - Che a - Cla h 8 - Cor a 1.0401 - Cry j 1 - Cuc m 2 - Cyn d - Der f 2 - Der p 2 - Fel d 1 - Hev b 8 - Jug r_pollen - Lep d 2 - Mer a 1 - Mus a - Par j 2 - Pas n - Pet c - Phl p 12 - Phl p 2 - Pho d 2 - Phr c - Sal k - Sec c_pollen,1
Aca m - Ama r - Amb a - Amb a 1 - Amb a 4 - Art v - Art v 1 - Bet v 1 - Bet v 2 - Bos d_meat - Can f 1 - Cap a - Cic a - Cit s - Cor a 1.0401 - Cuc m 2 - Cyn d - Cyn d 1 - Fel d 7 - Fra a 1+3 - Hev b 8 - Jug r_pollen - Lol p 1 - Mala s 6 - Man i - Mer a 1 - Mor r - Myt e - Ory c 3 - Ovi a_meat - Par j 2 - Pas n - Pers a - Phl p 1 - Phl p 12 - Pho d 2 - Phr c - Pla l - Pop n - Pru p 3 - Pyr c - Sa…
Aln g 1 - Alt a 1 - Amb a - Amb a 1 - Api g 1 - Bet v 1 - Can f 1 - Cla h 8 - Cor a 1.0103 - Cor a 1.0401 - Cor a_pollen - Fag s 1 - Fel d 1 - Fra a 1+3 - Jug r_pollen - Lol p 1 - Mal d 1 - Phl p 1 - Phl p 2 - Phl p 5.0101 - Phl p 6 - Sec c_pollen,1
Alt a 1 - Amb a - Amb a 1 - Der f 1 - Der f 2 - Der p 1 - Der p 2 - Der p 23 - Der p 7 - Fel d 1 - Gly d 2 - Lep d 2,1
Alt a 1 - Amb a - Amb a 4 - Art v - Art v 1 - Can f 4 - Fel d 1 - Par j 2 - Phl p 2 - Pop n - Sec c_flour,1
Aln g 1 - Alt a 1 - Amb a - Amb a 1 - Amb a 4 - Ara h 8 - Art v - Art v 1 - Bet v 1 - Can f 6 - Can f_Fd1 - Cor a 1.0103 - Cor a 1.0401 - Cor a_pollen - Cry j 1 - Cyn d - Fag s 1 - Fel d 1 - Fra a 1+3 - Gly m 4 - Mal d 1 - Ost e - Phl p 5.0101 - Phr c - Sec c_pollen,1
Aca m - Aln g 1 - Alt a 1 - Ama r - Amb a - Amb a 1 - Art v - Art v 1 - Bet v 1 - Bet v 2 - Cor a 1.0103 - Cor a 1.0401 - Cry j 1 - Cuc m 2 - Der f 2 - Der p 2 - Der p 5 - Fag s 1 - Fra a 1+3 - Fra e - Fra e 1 - Gly m 4 - Hev b 8 - Jug r_pollen - Lep d 2 - Mer a 1 - Ole e 1 - Pas n - Pers a - Phl p 1 - Phl p 12 - Pho d 2 - Phr c - Pop n - Pyr c - Raj c - Sec c_pollen,1
Alt a 1 - Amb a - Amb a 1 - Amb a 4 - Art v - Art v 1 - Bet v 1 - Cuc m 2 - Cyn d - Cyn d 1 - Phl p 1 - Pho d 2 - Phr c - Sec c_pollen,1
Api m - Api m 1 - Api m 10 - Asp f 6 - Bla g 9 - Der p 20 - Jug r_pollen - Mala s 11 - Myt e - Ory_meat - Par j 2 - Pen m 2 - Phl p 1 - Pis v 4_RUO - Pla l - Ten m,1
Act d 2 - Alt a 1 - Amb a - Amb a 1 - Bet v 1 - Bet v 2 - Can f_male urine - Cuc m 2 - Fel d 1 - Fra a 1+3 - Hev b 8 - Jug r_pollen - Mer a 1 - Phl p 12 - Pho d 2,1
Alt a 1 - Amb a - Amb a 1 - Amb a 4 - Art v - Art v 1 - Bet v 1 - Bet v 2 - Cuc m 2 - Cyn d - Cyn d 1 - Fel d 1 - Hev b 8 - Jug r_pollen - Lol p 1 - Mer a 1 - Ory c 3 - Phl p 1 - Phl p 12 - Pho d 2,1
Act d 10 - Aln g 1 - Alt a 1 - Amb a - Amb a 1 - Ana o - Ana o 3 - Api g 2 - Ara h 9 - Art v - Art v 1 - Art v 3 - Bet v 1 - Can s - Can s 3 - Car i - Cor a 1.0103 - Cor a 14 - Cor a 8 - Cor a_pollen - Cry j 1 - Cup a 1 - Fag s 1 - Fel d 1 - Fra a 1+3 - Jug r 1 - Jug r 2 - Jug r 3 - Jug r 4 - Jug r 6 - Lol p 1 - Mal d 3 - Phl p 1 - Phl p 5.0101 - Phl p 6 - Pis v 1 - Pis v 2 - Pis v 3 - Pla a 3 - …
Aca s - Alt a 1 - Art v - Art v 1 - Can f 1 - Der f 1 - Der f 2 - Der p 1 - Der p 2 - Der p 23 - Lep d 2 - Lol p 1 - Pas n - Phl p 1 - Phl p 2 - Pop n - Sec c_flour - Sec c_pollen - Tyr p - Ves v - Ves v 5,1
Aln g 1 - Alt a 1 - Amb a - Amb a 1 - Ara h 8 - Bet v 1 - Cla h 8 - Cor a 1.0103 - Cor a 1.0401 - Cor a_pollen - Cry j 1 - Fag s 1 - Fel d 1 - Fra a 1+3 - Gly m 4 - Mal d 1 - Phl p 2 - Pop n - Sec c_flour,1
Ach d - Amb a - Amb a 1 - Asp f 4 - Bla g 9 - Blo t 21 - Blo t 5 - Cyn d - Cyn d 1 - Der f 1 - Der f 2 - Der p 1 - Der p 2 - Der p 20 - Der p 21 - Der p 23 - Der p 5 - Der p 7 - Dol spp - Fel d 1 - Gly d 2 - Hev b 3 - Lep d 2 - Lol p 1 - Mala s 5 - Pas n - Pen m 2 - Per a - Phl p 1 - Pol d - Pol d 5 - Sol spp. - Sol t - Ten m - Tyr p - Tyr p 2 - Ves v - Ves v 5,1
Act d 2 - Aln g 1 - Alt a 1 - Amb a - Amb a 1 - Api g 1 - Api m - Ara h 8 - Bet v 1 - Bet v 2 - Can f 4 - Can f_Fd1 - Can f_male urine - Cor a 1.0103 - Cor a 1.0401 - Cor a_pollen - Cry j 1 - Cuc m 2 - Cuc p - Cup a 1 - Dau c - Dau c 1 - Der p 5 - Fag s 1 - Fel d 1 - Fra a 1+3 - Hev b 8 - Jug r_pollen - Mal d 1 - Mer a 1 - Phl p 12 - Phl p 2 - Pho d 2 - Pla a 2 - Pop n - Pyr c - Sal k,1
Aca s - Blo t 5 - Cyn d - Cyn d 1 - Der f 1 - Der f 2 - Der p 1 - Der p 2 - Der p 21 - Der p 23 - Der p 5 - Der p 7 - Gly d 2 - Lep d 2 - Mala s 5 - Pen m 1 - Phl p 2 - Tyr p - Tyr p 2,1
Aca m - Ach d - Ail a - Alt a 1 - Ama r - Amb a - Amb a 1 - Amb a 4 - Art v - Art v 1 - Bet v 1 - Bet v 2 - Cor a 1.0103 - Cor a 1.0401 - Cry j 1 - Cuc m 2 - Cup a 1 - Cyn d - Cyn d 1 - Der p 21 - Fag s 1 - Fel d 1 - Fra a 1+3 - Gly m 4 - Hev b 8 - Jug r_pollen - Lol p 1 - Mer a 1 - Pas n - Phl p 1 - Phl p 12 - Phl p 2 - Pho d 2 - Ten m,1
Asp f 4 - Mal d 1 - Myt e - Ost e,1
Aln g 1 - Alt a 1 - Bet v 1 - Can f 1 - Can f 3 - Can f 6 - Can f_Fd1 - Cap h_epithelia - Cor a 1.0103 - Cor a 1.0401 - Cor a_pollen - Equ c 1 - Equ c 3 - Equ c_meat - Fag s 1 - Fel d 1 - Fel d 2 - Fel d 4 - Fel d 7 - Fra a 1+3 - Mal d 1 - Ory_meat - Ovi a_meat - Phl p 2 - Sus d 1 - Sus d_epithelia,1
Alt a 1 - Amb a - Amb a 1 - Amb a 4 - Art v 1 - Can f 1 - Can f 4 - Fel d 1 - Pha v - Phl p 5.0101 - Phl p 6 - Pop n - Sec c_pollen - Ves v - Ves v 5,1
Aln g 1 - Alt a 1 - Ama r - Amb a - Amb a 1 - Amb a 4 - Art v - Art v 1 - Bet v 1 - Bet v 2 - Can f_male urine - Che a 1 - Cor a 1.0103 - Cor a 1.0401 - Cor a_pollen - Cuc m 2 - Cyn d - Cyn d 1 - Fag s 1 - Fel d 1 - Fra a 1+3 - Gly m 4 - Hev b 8 - Jug r_pollen - Lol p 1 - Mac inte - Mal d 1 - Mer a 1 - Pas n - Phl p 1 - Phl p 12 - Phl p 2 - Pho d 2 - Pol d 5 - Sal k - Sal k 1 - Sec c_pollen,1
Alt a 1 - Art v - Art v 1 - Bet v 1 - Can f_male urine - Cor a 1.0103 - Der f 2 - Der p 2 - Fag s 1 - Fel d 1 - Jug r_pollen - Lep d 2 - Phl p 5.0101 - Sec c_pollen,1
Alt a 1 - Bla g 4 - Blo t 5 - Can f_Fd1 - Der p 1 - Fel d 1 - Ory c 2 - Par j 2 - Pru p 3 - Sac c - Ses i 1,1
Alt a 1 - Amb a - Amb a 1 - Cuc m 2 - Der f 1 - Der p 1 - Phl p 1 - Pho d 2,1
Alt a 1 - Api g 1 - Art v 1 - Bet v 1 - Cor a 1.0103 - Fra a 1+3,1
Aln g 1 - Art v - Art v 1 - Bet v 1 - Bla g 2 - Bla g 4 - Blo t 5 - Can f 1 - Can f_Fd1 - Cav p 1 - Cla h 8 - Cor a 1.0103 - Cyn d - Cyn d 1 - Der f 1 - Der f 2 - Der p 1 - Der p 2 - Der p 21 - Der p 23 - Der p 5 - Der p 7 - Fag s 1 - Fel d 1 - Fel d 7 - Fra a 1+3 - Gly d 2 - Hev b 11 - Lep d 2 - Mal d 1 - Mala s 6 - Par j 2 - Pen ch - Pru p 3 - Sac c,1
Ach d - Act d 2 - Alt a 1 - Api m - Api m 1 - Fel d 1 - Loc m - Ost e - Sin - Sin a 1 - Ten m,1
Alt a 1 - Can f 3 - Cap h_epithelia - Equ c 1 - Equ c 3 - Equ c_meat - Fel d 1 - Fel d 2 - Fel d 4 - Mus m 1 - Ost e - Ovi a_meat - Sus d 1 - Sus d_epithelia,1
Alt a 1 - Amb a - Amb a 1 - Asp f 3 - Bla g 4 - Bos d_meat - Can f 6 - Can f_Fd1 - Cla h 8 - Equ c 1 - Equ c_meat - Fel d 1 - Fel d 4 - Ory c 3 - Ost e - Phl p 2 - Pol d - Pol d 5 - Ves v 5,1
Alt a 1 - Amb a - Amb a 4 - Par j 2 - Pol d 5 - Pop n - Sec c_flour - Ves v - Ves v 5,1
Act d 2 - Alt a 1 - Mala s 11 - Phl p 2 - Pop n - Sal k - Sec c_flour,1
Alt a 1 - Asp f 3 - Phl p 2 - Ves v 5,1
Aln g 1 - Amb a - Amb a 1 - Amb a 4 - Api g 1 - Art v - Art v 1 - Bet v 1 - Bos d_meat - Can f_Fd1 - Can f_male urine - Cor a 1.0103 - Cor a 1.0401 - Cor a_pollen - Der f 1 - Der f 2 - Der p 1 - Der p 2 - Der p 23 - Der p 7 - Equ c 1 - Equ c_meat - Fag s 1 - Fel d 1 - Fra a 1+3 - Gly d 2 - Gly m 5 - Lep d 2 - Lol p 1 - Mal d 1 - Mala s 6 - Mus m 1 - Ovi a_meat - Phl p 1 - Rat n,1
Alt a 1 - Amb a - Amb a 1 - Phl p 2 - Pop n,1
All s - Aln g 1 - Alt a 1 - Amb a - Amb a 1 - Api g 1 - Ara h 8 - Bet v 1 - Can f 6 - Can f_male urine - Cor a 1.0103 - Cor a 1.0401 - Cor a_pollen - Cry j 1 - Cup a 1 - Dau c - Dau c 1 - Der f 1 - Der f 2 - Der p 1 - Der p 2 - Der p 23 - Equ c 3 - Fag s 1 - Fel d 1 - Fra a 1+3 - Gly m 4 - Lep d 2 - Mal d 1 - Phl p 2,1
Aln g 1 - Alt a 1 - Amb a - Amb a 1 - Asp f 6 - Bet v 1 - Cor a 1.0103 - Cyn d - Cyn d 1 - Der f 2 - Der p 2 - Fag s 1 - Fel d 1 - Lol p 1 - Phl p 1 - Phl p 2,1
Aln g 1 - Alt a 1 - Amb a - Amb a 1 - Ara h 8 - Bet v 1 - Bet v 2 - Cor a 1.0103 - Cor a 1.0401 - Cor a_pollen - Cuc m 2 - Cyn d - Cyn d 1 - Fag s 1 - Fel d 1 - Fra a 1+3 - Gly m 4 - Hev b 8 - Jug r_pollen - Lol p 1 - Mal d 1 - Mer a 1 - Phl p 1 - Phl p 12 - Pho d 2 - Ves v - Ves v 5,1
Ail a - Ama r - Amb a - Amb a 1 - Art v - Asp f 4 - Bet v 2 - Bla g 4 - Can f 1 - Can f 2 - Can f 4 - Can f 6 - Can f_Fd1 - Cav p 1 - Cry j 1 - Cuc m 2 - Cup a 1 - Cyn d - Cyn d 1 - Equ c 1 - Fel d 1 - Fel d 4 - Fel d 7 - Gal d 4 - Gly d 2 - Hev b 8 - Jug r_pollen - Lol p 1 - Mac inte - Mer a 1 - Par j 2 - Pas n - Phl p 1 - Phl p 12 - Pho d 2 - Phod s 1 - Pol d 5 - Pru p 3 - Raj c - Sin - Sin a 1…
Aca m - Act d 10 - All s - Aln g 1 - Ama r - Api g 1 - Api g 2 - Ara h 8 - Ara h 9 - Art v - Art v 1 - Art v 3 - Bet v 1 - Bet v 2 - Blo t 5 - Can f 4 - Can s 3 - Car i - Clu h - Clu h 1 - Cor a 1.0103 - Cor a 1.0401 - Cor a 8 - Cor a_pollen - Cry j 1 - Cuc m 2 - Cup a 1 - Cyn d - Cyn d 1 - Cyp c 1 - Dau c - Dau c 1 - Der f 1 - Der f 2 - Der p 1 - Der p 2 - Der p 21 - Der p 23 - Der p 5 - Der p 7…
Aca m - Act d 10 - Ail a - All s - Alt a 1 - Amb a - Amb a 1 - Asp f 3 - Cry j 1 - Cup a 1 - Fel d 1 - Jug r_pollen - Ole e 1 - Phl p 2 - Pla a 2 - Pop n - Raj c - Ses i 1 - Ulm c,1
Aca s - Ach d - Blo t 5 - Can f 1 - Can f 2 - Can f_Fd1 - Cla h 8 - Cra c 6 - Cyn d - Cyn d 1 - Der f 1 - Der f 2 - Der p 1 - Der p 2 - Der p 21 - Der p 23 - Der p 5 - Fag s 1 - Fel d 1 - Fel d 7 - Gly d 2 - Lep d 2 - Lol p 1 - Pas n - Phl p 1 - Phl p 2 - Phl p 5.0101 - Phl p 6 - Phr c - Pis v 4_RUO - Sec c_pollen - Tyr p - Tyr p 2,1
Aca m - All s - Aln g 1 - Ama r - Amb a - Amb a 1 - Art v - Bet v 1 - Bet v 2 - Bro pa - Cap a - Car i - Che q - Cic a - Cit s - Cor a 1.0103 - Cor a 1.0401 - Cor a 11 - Cor a_pollen - Cry j 1 - Cuc m 2 - Cuc p - Cup a 1 - Cyn d - Cyn d 1 - Dol spp - Fag e - Fag s 1 - Fel d 1 - Fra a 1+3 - Fra e - Hel a - Hev b 8 - Hom s LF - Hor v - Jug r 2 - Jug r 6 - Jug r_pollen - Lol p 1 - Mac inte - Mal d 1…
Alt a 1 - Amb a - Amb a 1 - Cry j 1 - Der p 23 - Pas n - Phl p 5.0101 - Phl p 6 - Sec c_pollen,1
Alt a 1 - Art v - Art v 1 - Can f_male urine - Cor a 14 - Der f 2 - Der p 2 - Der p 23 - Hel a,1
Ach d - Aln g 1 - Amb a - Amb a 1 - Api g 1 - Ara h 8 - Asp f 6 - Bet v 1 - Bet v 2 - Cor a 1.0103 - Cor a 1.0401 - Cor a_pollen - Cry j 1 - Cuc m 2 - Cyn d - Cyn d 1 - Dau c - Dau c 1 - Der f 2 - Der p 2 - Der p 23 - Fag s 1 - Fel d 1 - Fra a 1+3 - Gly m 4 - Hev b 8 - Lep d 2 - Loc m - Lol p 1 - Mal d 1 - Mala s 11 - Mala s 5 - Mala s 6 - Mer a 1 - Pas n - Phl p 1 - Phl p 12 - Phl p 2 - Phl p 5.…
Ach d - Aln g 1 - Alt a 1 - Api g 1 - Ara h 8 - Bet v 1 - Can f 1 - Can f 3 - Can f 6 - Can f_Fd1 - Cor a 1.0103 - Cor a 1.0401 - Cor a_pollen - Dau c - Dau c 1 - Equ c 1 - Fag s 1 - Fel d 1 - Fel d 2 - Fel d 4 - Fel d 7 - Fra a 1+3 - Fra e 1 - Gly m 4 - Loc m - Mal d 1 - Per a - Pop n - Ten m - Tyr p,1
Act d 10 - Alt a 1 - Amb a - Amb a 1 - Art v 3 - Asp f 3 - Blo t 10 - Can f 1 - Can f_Fd1 - Cry j 1 - Cuc m 2 - Cup a 1 - Der f 1 - Der f 2 - Der p 1 - Der p 10 - Der p 2 - Der p 23 - Equ c 1 - Fel d 1 - Fel d 7 - Gly d 2 - Lep d 2 - Pen m 1 - Per a 7 - Phl p 12 - Phl p 2 - Pho d 2,1
Aln g 1 - Alt a 1 - Ama r - Amb a - Amb a 1 - Amb a 4 - Api g 1 - Ara h 8 - Art v - Art v 1 - Bet v 1 - Bet v 2 - Can f_male urine - Cap a - Cor a 1.0103 - Cor a 1.0401 - Cor a_pollen - Cry j 1 - Cuc m 2 - Cup a 1 - Cyn d - Dau c - Dau c 1 - Fag s 1 - Fel d 1 - Fra a 1+3 - Gly m 4 - Hev b 8 - Jug r_pollen - Mal d 1 - Mer a 1 - Phl p 12 - Phl p 5.0101 - Pho d 2 - Phr c - Pla a 2 - Pop n - Sal k - …
Act d 2 - Alt a 1 - Amb a - Amb a 1 - Art v 1 - Can f 1 - Can f 6 - Can f_Fd1 - Can f_male urine - Cic a - Cla h 8 - Cry j 1 - Cuc p - Cup a 1 - Equ c 1 - Fel d 1 - Fel d 4 - Fel d 7 - Jug r_pollen - Lol p 1 - Mus m 1 - Pha v - Phl p 1 - Phl p 2 - Phl p 5.0101 - Phl p 6 - Pis s - Pla a 2 - Pol d 5 - Pop n - Sec c_flour - Sec c_pollen - Ves v - Ves v 5,1
Aln g 1 - Alt a 1 - Amb a - Amb a 1 - Bet v 1 - Cor a 1.0103 - Cor a_pollen - Cry j 1 - Cup a 1 - Fag s 1 - Fel d 1 - Fra a 1+3 - Hom g - Mal d 1 - Pha v - Phl p 2 - Pop n,1
Alt a 1 - Amb a - Amb a 1 - Asp f 6 - Ave s - Cav p 1 - Cry j 1 - Hor v - Mala s 11 - Ory_meat - Phl p 5.0101 - Phl p 6 - Rud spp. - Sec c_pollen - Tri s,1
Alt a 1 - Amb a - Amb a 1 - Art v - Bet v 1 - Can f 3 - Can f 4 - Cav p 1 - Cry j 1 - Der f 2 - Der p 2 - Der p 20 - Der p 23 - Der p 5 - Equ c 1 - Equ c 3 - Fel d 1 - Fel d 2 - Fel d 4 - Gly d 2 - Lep d 2 - Lol p 1 - Mes a 1_RUO - Ory c 1 - Phl p 1,1
Alt a 1 - Amb a 1 - Der p 23 - Fel d 1 - Lol p 1 - Phl p 1,1
Alt a 1 - Art v 1 - Can f 1 - Can f 4 - Can f 6 - Can f_male urine - Cyn d 1 - Der f 1 - Der f 2 - Der p 1 - Der p 2 - Der p 21 - Der p 23 - Der p 5 - Der p 7 - Fel d 7 - Gly d 2 - Lol p 1 - Phl p 1,1
Aln g 1 - Alt a 1 - Amb a - Amb a 1 - Bet v 1 - Can f 1 - Can f_male urine - Cor a 1.0103 - Cor a 1.0401 - Der f 1 - Fag s 1 - Fel d 1 - Fel d 7 - Fra a 1+3 - Mal d 1,1
Act d 1 - Act d 10 - Aln g 1 - Alt a 1 - Amb a - Amb a 1 - Amb a 4 - Api g 1 - Art v - Art v 1 - Art v 3 - Asp f 1 - Bet v 1 - Cla h 8 - Cor a 1.0103 - Cor a 1.0401 - Cor a_pollen - Cyn d 1 - Dau c - Dau c 1 - Fag s 1 - Fel d 1 - Fra a 1+3 - Jug r 3 - Mal d 1 - Phl p 5.0101 - Phl p 6 - Pis v 4_RUO - Pla a 3 - Pop n - Pru p 3 - Sec c_pollen - Tri a 14,1
Asp f 6 - Bla g 9 - Car i - Der p 20 - Mala s 11,1
Alt a 1 - Fel d 2,1
Alt a 1 - Asp f 6 - Can f_Fd1 - Cla h - Cla h 8 - Fel d 1 - Myt e - Phl p 2 - Pop n - Sec c_flour,1
Act d 2 - Aln g 1 - Alt a 1 - Api g 1 - Ara h 8 - Bet v 1 - Clu h 1 - Cor a 1.0103 - Cor a 1.0401 - Cor a_pollen - Cuc p - Cyn d - Cyn d 1 - Dau c - Dau c 1 - Fag s 1 - Fel d 1 - Fra a 1+3 - Gly m 4 - Lol p 1 - Mal d 1 - Phl p 1 - Pru p 3 - Sal s 1 - Sco s 1 - Sec c_flour - Thu a 1,1
Act d 10 - Aln g 1 - Alt a 1 - Amb a - Amb a 1 - Api g 2 - Ara h 8 - Ara h 9 - Art v - Art v 1 - Art v 3 - Bet v 1 - Can f 4 - Can s - Can s 3 - Car i - Cor a 1.0103 - Cor a 1.0401 - Cor a 8 - Cor a_pollen - Cyn d - Cyn d 1 - Der f 2 - Der p 2 - Fag s 1 - Fel d 1 - Fra a 1+3 - Gly m 4 - Hel a - Jug r 1 - Jug r 2 - Jug r 3 - Jug r 6 - Lep d 2 - Lol p 1 - Mal d 1 - Mal d 3 - Pan m - Pha v - Phl p 1…
Alt a 1 - Amb a - Amb a 1 - Asp f 4 - Can f 1 - Can f 4 - Can f 6 - Can f_Fd1 - Cup a 1 - Cyn d 1 - Equ c 1 - Fel d 1 - Fel d 4 - Fel d 7 - Fra a 1+3 - Mus m 1 - Ory c 3 - Phl p 1 - Phl p 2 - Pop n - Sal k - Zea m 14,1
Alt a 1 - Can f_Fd1 - Cyn d 1 - Fel d 1 - Fel d 4 - Lol p 1 - Mes a 1_RUO - Phl p 1 - Ves v 5,1
Alt a 1 - Amb a 1 - Art v 1 - Cla h - Cla h 8 - Der f 2 - Der p 2 - Phl p 2,1
Aca m - Aln g 1 - Ama r - Amb a - Amb a 1 - Amb a 4 - Api g 1 - Ara h 8 - Art v - Art v 1 - Bet v 1 - Bet v 2 - Bos d 2 - Bro pa - Can f 1 - Cap a - Cic a - Cor a 1.0103 - Cor a 1.0401 - Cor a_pollen - Cry j 1 - Cuc m 2 - Cup a 1 - Dau c - Dau c 1 - Fag s 1 - Fel d 1 - Fra a 1+3 - Fra e - Gly m 4 - Hev b 8 - Hor v - Jug r_pollen - Mal d 1 - Mala s 6 - Mer a 1 - Pas n - Pers a - Pha v - Phl p 12 -…
Alt a 1 - Der f 1 - Der f 2 - Der p 1 - Der p 2 - Der p 23 - Gly d 2 - Lep d 2 - Pop n - Sec c_flour,1
Aca m - All c - Aln g 1 - Alt a 1 - Ama r - Amb a - Amb a 1 - Api g 1 - Ara h 8 - Bet v 1 - Bet v 2 - Cor a 1.0103 - Cor a 1.0401 - Cor a_pollen - Cry j 1 - Cuc m 2 - Cup a 1 - Cyn d - Cyn d 1 - Der f 2 - Der p 2 - Der p 23 - Fag s 1 - Fra a 1+3 - Gly d 2 - Hev b 8 - Jug r_pollen - Lep d 2 - Lol p 1 - Mal d 1 - Mer a 1 - Myt e - Pas n - Pha v - Phl p 1 - Phl p 12 - Phl p 5.0101 - Phl p 6 - Pho d …
Act d 10 - Aln g 1 - Alt a 1 - Bet v 1 - Cor a 1.0103 - Cor a_pollen - Fag s 1 - Fel d 1 - Fra a 1+3 - Lol p 1 - Phl p 1,1
Alt a 1 - Amb a - Amb a 1 - Cry j 1 - Cup a 1 - Der p 21 - Phl p 12 - Pho d 2,1
Act d 2 - Aln g 1 - Alt a 1 - Amb a - Amb a 1 - Amb a 4 - Ara h 8 - Bet v 1 - Cor a 1.0103 - Cor a 1.0401 - Cor a_pollen - Cry j 1 - Cuc p - Cup a 1 - Cyn d - Cyn d 1 - Der f 1 - Der f 2 - Der p 1 - Der p 10 - Der p 2 - Equ c 1 - Fag s 1 - Fel d 1 - Fel d 4 - Fra a 1+3 - Gly m 4 - Lep d 2 - Lol p 1 - Mal d 1 - Pas n - Phl p 1 - Phl p 2 - Phl p 5.0101 - Phl p 6 - Pla a 2 - Pop n - Sec c_pollen - V…
Aca m - Ach d - All s - Alt a 6 - Ama r - Amb a - Amb a 1 - Api m - Api m 1 - Api m 10 - Bla g 4 - Cap a - Cry j 1 - Cup a 1 - Fag e - Hom s LF - Jug r 6 - Jug r_pollen - Loc m - Mala s 6 - Pan m - Par j 2 - Pas n - Per a - Pers a - Phr c - Pla a 2 - Pol d - Pol d 5 - Pop n - Sal k - Sec c_pollen - Ses i 1 - Sin a 1 - Sol spp. - Sol t - Sola l - Ten m - Ulm c - Ves v 5,1
Aln g 1 - Alt a 1 - Amb a 4 - Api g 1 - Ara h 8 - Art v - Art v 1 - Bet v 1 - Can f 1 - Can f 6 - Cor a 1.0103 - Cor a 1.0401 - Cor a_pollen - Cuc p - Dau c - Dau c 1 - Fag s 1 - Fel d 1 - Fra a 1+3 - Gly m 4 - Jug r_pollen - Mal d 1 - Mus m 1 - Phl p 5.0101 - Phl p 6 - Pla a 2 - Rat n - Sec c_pollen,1
Aln g 1 - Alt a 1 - Alt a 6 - Amb a - Amb a 1 - Amb a 4 - Art v - Art v 1 - Bet v 1 - Can f 4 - Can f 6 - Cav p 1 - Cla h - Cla h 8 - Cor a 1.0103 - Cor a 1.0401 - Cor a_pollen - Cry j 1 - Cuc p - Cyn d - Cyn d 1 - Equ c 1 - Fag s 1 - Fel d 4 - Fra a 1+3 - Lol p 1 - Mal d 1 - Mala s 11 - Mes a 1_RUO - Mus m 1 - Myt e - Ory c 1 - Pap s - Phl p 1 - Phl p 5.0101 - Pho d 2 - Phr c - Pis s - Sec c_pol…
Aln g 1 - Alt a 1 - Amb a - Amb a 1 - Bet v 1 - Can f 1 - Can f 2 - Can f 3 - Can f 4 - Can f 6 - Can f_male urine - Cap h_epithelia - Cry j 1 - Equ c 1 - Equ c 3 - Fag s 1 - Fel d 1 - Fel d 2 - Fel d 4 - Fel d 7 - Jug r_pollen - Lol spp. - Mus m 1 - Myt e - Ost e - Ovi a_meat - Phl p 1 - Rat n - Sus d 1 - Sus d_epithelia,1
Aln g 1 - Alt a 1 - Amb a - Amb a 1 - Api g 1 - Bet v 1 - Bet v 2 - Bet v 6 - Bla g 4 - Cor a 1.0103 - Cor a 1.0401 - Cor a_pollen - Cuc m 2 - Cyn d - Cyn d 1 - Fag s 1 - Hev b 8 - Lol p 1 - Mal d 1 - Par j 2 - Pas n - Phl p 1 - Phl p 12 - Phl p 2 - Pho d 2 - Pop n - Pru p 3 - Sec c_flour,1
Aca m - Ail a - Ama r - Amb a - Amb a 1 - Ana o 2 - Ara h 8 - Asp f 4 - Bet v 1 - Bet v 2 - Can f 4 - Cit s - Cor a 1.0103 - Cor a 1.0401 - Cor a_pollen - Cry j 1 - Cuc m 2 - Cyn d - Cyn d 1 - Der p 20 - Der p 21 - Equ c_meat - Fag s 1 - Fel d 1 - Fra a 1+3 - Gly m 4 - Hev b 8 - Hor v - Jug r_pollen - Lol p 1 - Mal d 1 - Mer a 1 - Mus a - Pas n - Pen m 2 - Pers a - Pha v - Phl p 1 - Phl p 12 - Ph…
Alt a 1 - Amb a 1 - Bla g 4 - Can f 1 - Can f 6 - Can f_Fd1 - Cry j 1 - Der p 5 - Equ c 1 - Fel d 1 - Fel d 4 - Fel d 7 - Mala s 11 - Mes a 1_RUO - Mus m 1 - Par j 2 - Rat n - Sac c,1
Aln g 1 - Alt a 1 - Ama r - Amb a 1 - Ara h 8 - Art v - Art v 1 - Bet v 1 - Bet v 2 - Cor a 1.0103 - Cor a 1.0401 - Cor a_pollen - Cry j 1 - Cuc m 2 - Cuc p - Cup a 1 - Cyn d - Fag e - Fag s 1 - Fra a 1+3 - Hev b 8 - Jug r_pollen - Lol p 1 - Mal d 1 - Mala s 6 - Mer a 1 - Pha v - Phl p 1 - Phl p 12 - Pho d 2 - Pop n - Sal k - Sec c_pollen - Ulm c,1
Alt a 1 - Amb a 1 - Bet v 1 - Can f 1 - Can f_male urine - Cor a 1.0103 - Cor a 1.0401 - Cyn d - Cyn d 1 - Fag s 1 - Fel d 1 - Fra a 1+3 - Lol p 1 - Mal d 1 - Phl p 1 - Phl p 2 - Phl p 5.0101,1
Alt a 1 - Api g 1 - Bet v 1 - Bla g 4 - Bla g 9 - Cic a - Cor a 1.0103 - Cor a 1.0401 - Dau c - Dau c 1 - Der p 20 - Equ c 1 - Fag s 1 - Par j 2 - Phl p 2 - Pop n - Pru p 3 - Sac c - Sec c_flour,1
Aca s - Alt a 1 - Amb a - Amb a 1 - Art v 3 - Can f 1 - Can f_male urine - Cav p 1 - Der f 1 - Der f 2 - Der p 1 - Der p 2 - Fel d 1 - Gal d 1 - Gal d 2 - Gal d 3 - Gal d 4 - Gal d 5 - Gal d_white - Gal d_yolk - Gly d 2 - Lep d 2 - Lol p 1 - Mal d 3 - Mala s 5 - Ory c 3 - Phl p 1 - Phl p 2 - Pru p 3 - Ses i - Ses i 1 - Tyr p - Tyr p 2 - Zea m - Zea m 14,1
Alt a 6 - Amb a - Amb a 1 - Can f_Fd1 - Cla h 8 - Cyn d - Cyn d 1 - Der f 1 - Fel d 1 - Lol p 1 - Mala s 6 - Pas n - Phl p 1,1
Alt a 1 - Bet v 1 - Fel d 1 - Lol p 1 - Phl p 1,1
Aln g 1 - Alt a 1 - Amb a - Amb a 1 - Bet v 1 - Bet v 2 - Cor a 1.0103 - Cor a 1.0401 - Cry j 1 - Cuc m 2 - Fag s 1 - Fel d 1 - Fra a 1+3 - Hev b 8 - Mal d 1 - Mer a 1 - Phl p 12 - Pho d 2,1
Ama r - Api m - Asp f 1 - Bla g 9 - Cuc p - Der p 20 - Pop n - Sec c_flour,1
Amb a 1 - Ana o - Ana o 3 - Ara h 1 - Ara h 2 - Ara h 3 - Ara h 9 - Bos d 4 - Can f 1 - Can f 2 - Can f 4 - Can f 6 - Can f_male urine - Cla h 8 - Cor a 8 - Cry j 1 - Equ c 1 - Fel d 1 - Fel d 4 - Fel d 7 - Gal d 2 - Gal d 3 - Gal d 4 - Gal d_white - Gal d_yolk - Gly d 2 - Jug r 3 - Mala s 6 - Phl p 1 - Pis v 1 - Pru p 3 - Sin - Sin a 1 - Zea m 14,1
Alt a 1 - Asp f 3 - Cyn d - Cyn d 1 - Lol p 1 - Pas n - Phl p 1,1
Alt a 1 - Amb a - Amb a 1 - Ara h 8 - Bet v 1 - Bos d 6 - Can f 1 - Can f 3 - Can f 6 - Can f_male urine - Cap h_epithelia - Cor a 1.0103 - Cor a 1.0401 - Cyn d 1 - Equ c 3 - Fag s 1 - Fel d 1 - Fel d 2 - Fel d 4 - Fel d 7 - Fra a 1+3 - Gly m 4 - Lol p 1 - Mal d 1 - Ory_meat - Ovi a_meat - Phl p 1 - Sus d 1,1
Aca s - Amb a - Amb a 4 - Ara h 3 - Art v - Art v 1 - Asp f 3 - Asp f 6 - Blo t 10 - Blo t 5 - Bos d 6 - Can f 1 - Can f 3 - Can f 4 - Can f 6 - Can f_Fd1 - Can f_male urine - Can s - Cav p 1 - Cla h 8 - Cyn d - Cyn d 1 - Der f 1 - Der f 2 - Der p 1 - Der p 2 - Der p 21 - Der p 23 - Der p 5 - Der p 7 - Dol spp - Equ c 1 - Equ c 3 - Equ c_meat - Fel d 1 - Fel d 2 - Fel d 4 - Fel d 7 - Gal d_white …
Aca m - All s - Aln g 1 - Alt a 1 - Ama r - Api g 2 - Ara h 9 - Bet v 1 - Bet v 2 - Bro pa - Can f 1 - Can f 6 - Can s 3 - Che a - Cic a - Cor a 1.0103 - Cor a 1.0401 - Cor a 8 - Cor a_pollen - Cry j 1 - Cuc m 2 - Cup a 1 - Cup s - Equ c 1 - Fag s 1 - Fel d 1 - Fel d 4 - Fel d 7 - Fra a 1+3 - Gly m 4 - Hev b 8 - Hom s LF - Jug r 6 - Jug r_pollen - Jun a - Len c - Lol p 1 - Mal d 1 - Mal d 3 - Mer…
Alt a 1 - Cyn d 1 - Der f 1 - Der f 2 - Der p 1 - Der p 2 - Der p 23 - Der p 5 - Fel d 1 - Gly d 2,1
Aln g 1 - Alt a 1 - Bet v 1 - Cor a 1.0103 - Cyn d - Cyn d 1 - Fag s 1 - Lol p 1 - Phl p 1,1
Aca s - Ach d - Aln g 1 - Aln g 4 - Amb a - Amb a 4 - Api g 1 - Api g 6 - Ara h 1 - Ara h 2 - Ara h 6 - Ara h 8 - Art v - Art v 1 - Art v 3 - Bet v 1 - Can f 1 - Can f_Fd1 - Clu h - Clu h 1 - Cor a 1.0103 - Cor a 1.0401 - Cor a 8 - Cor a_pollen - Cyn d - Cyp c 1 - Dau c - Dau c 1 - Der f 1 - Der f 2 - Der p 1 - Der p 2 - Der p 21 - Der p 23 - Fag s 1 - Fel d 1 - Fel d 7 - Fra a 1+3 - Gad m - Gad …
Alt a 6 - Clu h 1 - Cyp c 1 - Der f 1 - Fel d 1 - Gad m - Gad m 1 - Sal s 1 - Sco s 1 - Thu a 1 - Xip g 1,1
Aln g 1 - Alt a 1 - Amb a - Amb a 1 - Ara h 8 - Bet v 1 - Cla h - Cla h 8 - Cor a 1.0103 - Cor a 1.0401 - Cor a_pollen - Cry j 1 - Cyn d - Cyn d 1 - Der p 23 - Fag s 1 - Fel d 1 - Fra a 1+3 - Gly m 4 - Hom g - Lol p 1 - Lol spp. - Mal d 1 - Mala s 6 - Ost e - Pan b - Pas n - Pec spp. - Phl p 1 - Phl p 5.0101 - Sec c_pollen,1
Aln g 4 - Amb a - Amb a 1 - Asp f 6 - Ave s - Bla g 9 - Can f 1 - Can f 4 - Can f 6 - Can f_male urine - Cav p 1 - Cry j 1 - Cyn d 1 - Der p 20 - Equ c 1 - Fel d 1 - Fel d 4 - Fic c - Lol p 1 - Mala s 11 - Mala s 5 - Mala s 6 - Mes a 1_RUO - Mus m 1 - Ory c 1 - Ory_meat - Pen m 2 - Phl p 1 - Phod s 1 - Phr c - Rat n - Sus d 1,1
Alt a 1 - Amb a - Amb a 1 - Can f 1 - Can f 2 - Can f 3 - Can f 4 - Can f_Fd1 - Can f_male urine - Cry j 1 - Equ c 3 - Fel d 1 - Fel d 2 - Fel d 7 - Ovi a_meat - Sec c_flour - Sus d 1,1
All s - Aln g 1 - Alt a 1 - Amb a - Amb a 1 - Bet v 1 - Can f 4 - Can f_male urine - Cic a - Cla h 8 - Cry j 1 - Cyn d - Cyn d 1 - Der f 2 - Der p 2 - Fag s 1 - Fel d 1 - Fra a 1+3 - Gly d 2 - Lol p 1 - Mala s 6 - Mus m 1 - Ory c 2 - Pap s - Pas n - Phl p 1 - Phl p 2 - Phl p 5.0101 - Phl p 6 - Phr c - Pis s - Pop n - Sec c_pollen,1
Cla h - Cla h 8 - Der p 23 - Lol p 1 - Phl p 1 - Pop n - Pru p 3 - Sec c_flour - Vac m,1
Aca s - Alt a 1 - Can f 4 - Der f 2 - Der p 1 - Der p 2 - Der p 23 - Der p 7 - Fel d 1 - Gly d 2 - Lep d 2 - Pol d 5,1
Alt a 1 - Amb a - Amb a 1 - Bet v 1 - Cav p 1 - Cry j 1 - Cyn d - Cyn d 1 - Fra a 1+3 - Lol p 1 - Pas n - Phl p 1 - Phl p 2 - Phl p 5.0101 - Phl p 6 - Phr c - Sec c_pollen,1
Ach d - Alt a 1 - Amb a - Amb a 1 - Der p 23 - Fra e - Fra e 1 - Jug r_pollen - Loc m - Ole e 1 - Phl p 2 - Pho d 2 - Pol d - Pol d 5 - Ten m - Ves v - Ves v 5,1
Aln g 1 - Alt a 1 - Amb a - Amb a 1 - Api g 1 - Ara h 8 - Art v 1 - Asp f 3 - Bet v 1 - Cor a 1.0103 - Cor a 1.0401 - Cor a_pollen - Dau c - Dau c 1 - Fag s 1 - Fel d 1 - Fra a 1+3 - Mal d 1 - Mala s 6 - Phl p 2,1
Alt a 1 - Fel d 1 - Pop n - Sec c_flour,1
Aln g 1 - Alt a 1 - Amb a - Amb a 1 - Api g 1 - Ara h 8 - Bet v 1 - Can f 1 - Can f 4 - Can f 6 - Can f_male urine - Cor a 1.0103 - Cor a 1.0401 - Cor a_pollen - Cyn d - Cyn d 1 - Dau c - Dau c 1 - Equ c 1 - Fag s 1 - Fel d 4 - Fel d 7 - Fra a 1+3 - Lol p 1 - Mal d 1 - Ory c 3 - Phl p 1 - Phl p 5.0101 - Phl p 6 - Sec c_pollen,1
Alt a 1 - Amb a - Amb a 4 - Art v 1 - Cyn d 1 - Der f 2 - Der p 2 - Der p 23 - Fra e - Fra e 1 - Lep d 2 - Lol p 1 - Ole e 1 - Phl p 1,1
Alt a 1 - Amb a - Amb a 1 - Art v - Art v 1 - Bet v 2 - Can f_male urine - Cry j 1 - Cuc m 2 - Fel d 1 - Hev b 8 - Jug r_pollen - Mer a 1 - Phl p 12 - Phl p 2 - Pho d 2 - Pop n - Sal k,1
Aca s - Act d 2 - Aln g 1 - Alt a 1 - Bet v 1 - Bla g 9 - Cor a 1.0401 - Der f 1 - Der f 2 - Der p 1 - Der p 2 - Der p 20 - Der p 23 - Der p 7 - Fag s 1 - Fra a 1+3 - Gly d 2 - Lep d 2 - Lol p 1 - Mal d 1 - Pen m 2 - Phl p 1 - Tyr p - Tyr p 2,1
Alt a 1 - Can f 1 - Cla h 8 - Phl p 1,1
Aln g 1 - Alt a 1 - Api g 1 - Art v 1 - Bet v 1 - Cor a 1.0103 - Cor a 1.0401 - Cor a_pollen - Cyn d - Cyn d 1 - Dau c - Der f 1 - Der f 2 - Der p 1 - Der p 2 - Der p 23 - Der p 7 - Fag s 1 - Fel d 1 - Fra a 1+3 - Gal d 1 - Gal d 2 - Gal d_white - Gly d 2 - Lep d 2 - Lol p 1 - Mal d 1 - Pas n - Phl p 1 - Phl p 5.0101 - Phl p 6 - Sec c_pollen,1
Aln g 1 - Alt a 1 - Ama r - Amb a - Amb a 1 - Api g 1 - Ara h 8 - Bet v 1 - Bet v 2 - Bet v 6 - Can f_Fd1 - Cor a 1.0103 - Cor a 1.0401 - Cor a_pollen - Cry j 1 - Cuc m 2 - Cyn d - Cyn d 1 - Dau c - Dau c 1 - Fag s 1 - Fel d 1 - Fel d 7 - Fra a 1+3 - Gly m 4 - Hev b 8 - Jug r_pollen - Lol p 1 - Mal d 1 - Mala s 6 - Mer a 1 - Phl p 1 - Phl p 12 - Pho d 2 - Urt d - Ves v 5,1
Alt a 1 - Amb a - Amb a 1 - Bet v 2 - Can f_Fd1 - Cor a_pollen - Cry j 1 - Cuc m 2 - Der f 2 - Der p 2 - Fel d 1 - Hev b 8 - Jug r_pollen - Lep d 2 - Mer a 1 - Phl p 12 - Pho d 2,1
Alt a 1 - Amb a - Amb a 1 - Asp f 3 - Can f 1 - Can f_Fd1 - Der p 5 - Fel d 1 - Fel d 4 - Fel d 7 - Phl p 2,1
Alt a 1 - Cla h - Cla h 8 - Fel d 1 - Gal d 3 - Lol p 1 - Phl p 1 - Phl p 2 - Phl p 5.0101 - Phl p 6 - Pol d 5 - Sec c_pollen,1
Aln g 1 - Alt a 1 - Amb a - Amb a 1 - Api g 6 - Ara h 8 - Art v 3 - Bet v 1 - Can f_male urine - Cla h - Cor a 1.0103 - Cor a 1.0401 - Cor a_pollen - Fag s 1 - Fel d 1 - Fra a 1+3 - Gly m 4 - Mal d 1 - Phl p 2 - Pol d - Pol d 5 - Pop n - Sal k - Ves v 5,1
Aca m - Act d 10 - Alt a 1 - Ama r - Amb a - Amb a 1 - Ara h 9 - Art v 3 - Bet v 1 - Bet v 2 - Bla g 4 - Cla h - Cla h 8 - Cor a 8 - Cuc m 2 - Cyn d - Cyn d 1 - Fel d 1 - Fra a 1+3 - Hev b 8 - Jug r 3 - Jug r_pollen - Lol p 1 - Mal d 3 - Mala s 6 - Mer a 1 - Ost e - Pan m - Pas n - Phl p 1 - Phl p 12 - Phl p 2 - Pho d 2 - Phod s 1 - Phr c - Pla a 3 - Pop n - Pru p 3 - Pyr c - Sac c - Sal k - Sec …
Alt a 1 - Art v - Art v 1 - Cap a - Lol p 1 - Phl p 1 - Phl p 2 - Pop n - Sec c_flour - Ves v 5,1
Alt a 1 - Art v - Art v 1 - Bet v 1 - Cla h 8 - Mala s 6 - Phl p 5.0101 - Phl p 6 - Pop n - Sec c_flour - Sec c_pollen,1
Alt a 1 - Amb a - Amb a 1 - Art v - Bet v 2 - Can f_Fd1 - Cry j 1 - Cuc m 2 - Cup a 1 - Fel d 1 - Hev b 8 - Jug r_pollen - Mer a 1 - Phl p 1 - Phl p 12 - Pho d 2,1
Act d 2 - Aln g 1 - Alt a 1 - Amb a - Amb a 1 - Bet v 1 - Bet v 2 - Cla h 8 - Cor a 1.0103 - Cor a 1.0401 - Cor a_pollen - Cry j 1 - Cuc m 2 - Cup a 1 - Equ c 1 - Fag e - Fag s 1 - Mal d 1 - Ory c 2 - Ory c 3 - Par j 2 - Pha v - Phl p 12 - Phl p 2 - Pho d 2 - Pop n - Sec c_flour,1
Aln g 1 - Alt a 1 - Amb a - Amb a 1 - Ana o - Ana o 3 - Ara h 1 - Ara h 8 - Bet v 1 - Bet v 2 - Can f 1 - Can f 4 - Can f_Fd1 - Car i - Clu h - Clu h 1 - Cor a 1.0103 - Cor a 1.0401 - Cor a_pollen - Cuc m 2 - Cyp c 1 - Der f 1 - Der p 1 - Fag s 1 - Fel d 1 - Fel d 7 - Fra a 1+3 - Gad m - Gad m 1 - Gal d 4 - Gly m 4 - Jug r 1 - Jug r 2 - Jug r 6 - Mal d 1 - Mes a 1_RUO - Phl p 12 - Phl p 5.0101 - …
Act d 10 - Aln g 1 - Alt a 1 - Amb a - Amb a 1 - Ara h 9 - Art v 3 - Bet v 1 - Can s 3 - Cor a 1.0103 - Cor a 1.0401 - Cor a 8 - Cor a_pollen - Cry j 1 - Cyn d 1 - Fag s 1 - Fra a 1+3 - Gly m 4 - Lol p 1 - Mal d 1 - Mal d 3 - Phl p 1 - Pla a 3 - Pru p 3 - Zea m - Zea m 14,1
Alt a 1 - Amb a - Amb a 1 - Amb a 4 - Art v 1 - Bet v 1 - Bet v 2 - Cav p 1 - Cor a 1.0103 - Cor a 1.0401 - Cuc m 2 - Cyn d - Cyn d 1 - Fag s 1 - Fra e - Fra e 1 - Hev b 8 - Lol p 1 - Mal d 1 - Ole e 1 - Ory c 1 - Pas n - Pha v - Phl p 1 - Phl p 12 - Phl p 2 - Pho d 2 - Pop n - Sec c_flour - Sec c_pollen - Sin a 1,1
Alt a 1 - Bla g 5 - Bla g 9 - Cyn d - Cyn d 1 - Lol p 1 - Pha v - Phl p 1 - Pop n - Sal k - Sec c_flour,1
Alt a 1 - Amb a 1 - Cry j 1 - Der f 1 - Fel d 1 - Phl p 2 - Ves v 5,1
Alt a 1 - Can f 1 - Can f_Fd1 - Fel d 1 - Fel d 4 - Fel d 7 - Lol p 1 - Phl p 1 - Phl p 2 - Phl p 5.0101,1
Aln g 4 - Alt a 1 - Amb a - Amb a 1 - Art v - Art v 1 - Cyn d - Der p 23 - Par j 2 - Phl p 2 - Sec c_pollen - Thu a 1,1
Alt a 1 - Amb a - Amb a 1 - Amb a 4 - Art v - Art v 1 - Bla g 9 - Cry j 1 - Der p 20 - Mac inte - Pen m 2,1
Alt a 1 - Lol p 1 - Pha v - Phl p 1 - Phl p 2 - Pop n - Sec c_flour,1
Act d 2 - Alt a 1 - Amb a - Amb a 1 - Asp f 3 - Fel d 1 - Ten m,1
Alt a 1 - Amb a - Amb a 1 - Der f 1 - Der p 1 - Fel d 1,1
Alt a 1 - Amb a 1 - Cyn d - Cyn d 1 - Der f 1 - Lol p 1 - Phl p 1,1
Act d 10 - Act d 2 - Alt a 1 - Amb a - Amb a 1 - Amb a 4 - Ara h 9 - Art v - Art v 1 - Can f 1 - Can f 6 - Can f_Fd1 - Can f_male urine - Cor a 8 - Cry j 1 - Cuc m 2 - Equ c 1 - Fel d 1 - Fel d 7 - Fra a 1+3 - Mal d 3 - Pho d 2 - Pla a 3 - Zea m - Zea m 14,1
Act d 2 - Alt a 1 - Blo t 21 - Can f 1 - Der p 20 - Der p 21 - Pha v - Phl p 1 - Phl p 2 - Pis v 4_RUO - Pop n - Sco s - Sec c_flour - Sin a 1,1
Amb a - Amb a 1 - Api m 1 - Api m 10 - Art v - Ave s - Ber e - Bet v 1 - Bet v 2 - Can f 4 - Cla h - Cry j 1 - Cuc m 2 - Cuc p - Gal d 5 - Gal d_white,1
Aln g 1 - Alt a 1 - Amb a - Amb a 1 - Bet v 1 - Cor a 1.0103 - Cor a 1.0401 - Cor a_pollen - Cuc m 2 - Fag s 1 - Fel d 1 - Mal d 1 - Mer a 1 - Phl p 12 - Pho d 2 - Sal k 1,1
Alt a 1 - Der f 1 - Ost e - Phl p 2 - Sec c_flour,1
Aca m - Ail a - Alt a 1 - Ama r - Amb a - Amb a 1 - Art v - Bet v 2 - Cit s - Cry j 1 - Cuc m 2 - Cup a 1 - Cyn d - Cyn d 1 - Der p 23 - Hev b 8 - Jug r_pollen - Lol p 1 - Mer a 1 - Mor r - Pas n - Phl p 1 - Phl p 12 - Phl p 5.0101 - Phl p 6 - Pho d 2 - Pop n - Pyr c - Raj c - Sal k - Sec c_pollen - Ves v 5,1
Alt a 1 - Art v 1 - Cyn d - Cyn d 1 - Lol p 1 - Phl p 1,1
Aca m - Ach d - Act d 10 - Act d 2 - Ail a - All c - All s - Aln g 1 - Alt a 1 - Ama r - Amb a - Amb a 1 - Ana o - Ana o 2 - Api g 1 - Api g 2 - Ara h 1 - Ara h 2 - Ara h 3 - Ara h 8 - Ara h 9 - Art v - Art v 3 - Ber e - Bet v 1 - Bet v 2 - Bla g 4 - Bro pa - Can f 1 - Can f 2 - Can s 3 - Cap a - Car i - Car p - Che q - Cic a - Cit s - Cor a 1.0103 - Cor a 1.0401 - Cor a 11 - Cor a 8 - Cor a 9 - …
Aca m - Ach d - Act d 1 - Ail a - All c - All s - Aln g 1 - Ama r - Amb a - Amb a 1 - Ana o - Ana o 3 - Api g 1 - Art v - Art v 1 - Bet v 1 - Bet v 2 - Bet v 6 - Bro pa - Can f 1 - Can f 4 - Can f 6 - Cap a - Car i - Car p - Cav p 1 - Che a - Che q - Cic a - Cit s - Clu h - Cor a 1.0103 - Cor a 1.0401 - Cor a 14 - Cor a 8 - Cor a_pollen - Cry j 1 - Cuc m 2 - Cuc p - Cup a 1 - Cyn d - Dau c - Dau …
Alt a 1 - Asp f 3 - Pol d 5,1
Alt a 1 - Can f_Fd1 - Cyn d - Cyn d 1 - Equ c 1 - Fel d 1 - Fel d 4 - Fel d 7 - Lol p 1 - Mus m 1 - Pas n - Phl p 1 - Rat n,1
Aln g 1 - Alt a 1 - Api g 1 - Ara h 8 - Bet v 1 - Cor a 1.0103 - Cor a 1.0401 - Cyn d - Cyn d 1 - Der f 2 - Der p 2 - Fag s 1 - Fel d 1 - Fra a 1+3 - Gly m 4 - Lol p 1 - Mal d 1 - Phl p 1 - Phl p 2,1
Alt a 1 - Der f 1 - Der f 2 - Der p 1 - Der p 2 - Der p 23 - Gly d 2 - Lep d 2,1
Alt a 1 - Amb a - Amb a 1 - Bet v 1 - Cry j 1 - Fel d 1,1
Aca m - Ail a - All s - Aln g 1 - Alt a 1 - Ama r - Amb a - Amb a 1 - Api g 1 - Ara h 8 - Bet v 1 - Can f_Fd1 - Car i - Cor a 1.0103 - Cor a 1.0401 - Cor a_pollen - Cry j 1 - Cuc p - Cup a 1 - Dau c - Dau c 1 - Fag s 1 - Fel d 1 - Fra a 1+3 - Gly m 4 - Jug r 1 - Jug r 2 - Jug r 6 - Jug r_pollen - Mal d 1 - Mala s 6 - Ost e - Phl p 2 - Pla a 2 - Pop n - Pru av - Pyr c - Sal k - Ses i - Ses i 1,1
Act d 10 - Aln g 1 - Alt a 1 - Amb a - Amb a 1 - Amb a 4 - Ana o - Ana o 3 - Api g 1 - Api g 2 - Ara h 8 - Ara h 9 - Art v - Art v 1 - Art v 3 - Bet v 1 - Bet v 2 - Car i - Cor a 1.0103 - Cor a 1.0401 - Cor a_pollen - Cuc m 2 - Cyn d - Cyn d 1 - Dau c - Dau c 1 - Fag s 1 - Fel d 1 - Fra a 1+3 - Gly m 4 - Hev b 8 - Jug r 1 - Jug r 2 - Jug r 6 - Jug r_pollen - Lol p 1 - Mal d 1 - Mal d 3 - Mer a 1 …
Aca m - Act d 10 - Act d 2 - All c - All s - Aln g 1 - Alt a 1 - Ama r - Amb a - Amb a 1 - Ana o - Ana o 3 - Api g 1 - Api g 2 - Api g 6 - Ara h 8 - Ara h 9 - Arg r 1 - Art v - Art v 1 - Art v 3 - Asp f 6 - Ave s - Ber e - Ber e 1 - Bet v 1 - Bos d 4 - Bos d 8 - Bos d_milk - Can f 1 - Can f_Fd1 - Can s - Can s 3 - Cap a - Cap h_milk - Car i - Che q - Cor a 1.0103 - Cor a 1.0401 - Cor a 11 - Cor a…
Alt a 1 - Ost e - Phl p 1,1
Amb a - Amb a 1 - Amb a 4 - Art v - Art v 1 - Bet v 6 - Can f 1 - Can f 4 - Can f 6 - Cav p 1 - Equ c 1 - Fel d 1 - Fel d 4 - Fel d 7 - Gal d 3 - Gal d 5 - Gal d_meat - Gal d_white - Jug r 2 - Mala s 11 - Mes a 1_RUO - Mus m 1 - Ory c 1 - Ory c 2 - Ory c 3 - Par j 2 - Phod s 1 - Sol t - Sus d_meat,1
Alt a 1 - Ana o - Ana o 3 - Pha v - Phl p 2 - Pis v 1 - Pop n,1
Ach d - Alt a 1 - Ama r - Amb a - Amb a 1 - Ani s 3 - Bet v 1 - Bet v 2 - Blo t 10 - Can f 1 - Can f 4 - Can f 6 - Can f_Fd1 - Chi spp. - Cic a - Cry j 1 - Cuc m 2 - Cyn d - Cyn d 1 - Der f 2 - Der p 10 - Der p 2 - Equ c 1 - Fag s 1 - Fel d 1 - Fel d 4 - Fel d 7 - Hev b 8 - Jug r_pollen - Lep d 2 - Loc m - Lol p 1 - Mal d 1 - Mer a 1 - Mus m 1 - Ory c 3 - Pap s - Pas n - Pen m 1 - Per a 7 - Phl p…
Amb a - Amb a 1 - Cry j 1 - Der f 1 - Der f 2 - Der p 1 - Der p 2 - Der p 23 - Der p 7 - Fel d 1 - Gly d 2 - Lep d 2 - Mala s 5,1
Alt a 1 - Amb a - Amb a 1 - Bet v 1 - Can f_Fd1 - Cor a 1.0103 - Cor a 1.0401 - Cor a_pollen - Fag s 1 - Fel d 1 - Fra a 1+3 - Mal d 1,1
Aca m - Alt a 1 - Art v - Art v 1 - Bet v 2 - Cuc m 2 - Cyn d - Cyn d 1 - Der f 1 - Der f 2 - Der p 1 - Der p 2 - Der p 21 - Der p 23 - Der p 5 - Gly d 2 - Hev b 8 - Jug r_pollen - Lol p 1 - Mer a 1 - Pas n - Phl p 1 - Phl p 12 - Phl p 5.0101 - Phl p 6 - Pho d 2 - Phod s 1 - Phr c - Sec c_pollen,1
Act d 2 - Alt a 1 - Amb a - Amb a 1 - Can f 1 - Can f_Fd1 - Cyn d - Cyn d 1 - Der f 1 - Der f 2 - Der p 1 - Der p 2 - Fel d 1 - Lol p 1 - Phl p 1 - Phl p 2,1
Aln g 1 - Alt a 1 - Ara h 8 - Bet v 1 - Can f_male urine - Cor a 1.0103 - Cor a 1.0401 - Cor a_pollen - Der f 2 - Der p 2 - Der p 5 - Fag s 1 - Fel d 1 - Fel d 4 - Fra a 1+3 - Lep d 2 - Mal d 1 - Pla l 1,1
Alt a 1 - Amb a - Amb a 1 - Can f 1 - Cry j 1 - Fel d 1,1
Asp f 6 - Can f 1 - Can f 6 - Can f_male urine - Equ c 1 - Fel d 1 - Fel d 4 - Fel d 7 - Mala s 11 - Mala s 6,1
Aln g 1 - Alt a 1 - Amb a - Amb a 1 - Api g 1 - Ara h 8 - Bet v 1 - Bet v 2 - Cor a 1.0103 - Cor a 1.0401 - Cor a_pollen - Cuc m 2 - Cyn d - Cyn d 1 - Dau c - Dau c 1 - Der f 1 - Der f 2 - Der p 1 - Der p 2 - Fag s 1 - Fel d 1 - Fra a 1+3 - Gly d 2 - Gly m 4 - Hev b 8 - Lep d 2 - Lol p 1 - Mal d 1 - Mer a 1 - Phl p 1 - Phl p 12 - Phl p 5.0101 - Phl p 6 - Pho d 2 - Sec c_pollen,1
Alt a 1 - Lol p 1 - Phl p 1 - Pop n - Sec c_flour,1
Aca m - All s - Aln g 1 - Alt a 1 - Ama r - Amb a - Amb a 1 - Api g 1 - Ara h 8 - Bet v 1 - Cor a 1.0103 - Cor a 1.0401 - Cor a_pollen - Dau c - Dau c 1 - Fag s 1 - Fel d 1 - Fra a 1+3 - Mala s 6 - Phl p 2 - Ses i 1,1
Alt a 1 - Art v - Art v 1 - Bet v 1 - Cor a 1.0103 - Der p 23 - Fag s 1 - Fel d 1,1
Alt a 1 - Can f 1 - Cla h - Cla h 8 - Fel d 7 - Myt e - Ost e - Phl p 2,1
Alt a 1 - Amb a - Amb a 1 - Can f_male urine - Cry j 1 - Cyn d - Cyn d 1 - Der f 1 - Der p 1 - Fel d 1 - Fel d 4 - Lol p 1 - Mus m 1 - Pha v - Phl p 1 - Pop n - Rat n,1
Alt a 1 - Can f_Fd1 - Der p 23 - Fel d 1 - Phl p 2,1
Act d 10 - Ail a - Aln g 1 - Aln g 4 - Alt a 1 - Amb a - Amb a 1 - Api g 2 - Ara h 2 - Ara h 8 - Ara h 9 - Art v - Art v 3 - Bet v 1 - Car i - Clu h - Clu h 1 - Cor a 1.0103 - Cor a 1.0401 - Cor a 14 - Cor a 8 - Cor a_pollen - Cry j 1 - Cup a 1 - Cyp c 1 - Der f 2 - Der p 2 - Fag s 1 - Fel d 1 - Fra a 1+3 - Gad m - Gad m 1 - Gly m 4 - Hel a - Jug r 1 - Jug r 2 - Lep d 2 - Mal d 1 - Mal d 3 - Pla …
Alt a 1 - Fel d 1 - Phl p 2 - Ves v 5,1
Alt a 1 - Amb a - Amb a 1 - Amb a 4 - Art v - Art v 1 - Cry j 1 - Der p 23 - Fag e 2 - Fel d 1 - Phl p 5.0101 - Pla l - Pol d 5 - Pop n - Raj c,1
Fel d 1 - Lol p 1 - Mala s 6 - Phl p 1 - Pol d 5,1
Aln g 1 - Alt a 1 - Bet v 1 - Bos d 6 - Can f 1 - Can f 3 - Can f_Fd1 - Che a 1 - Cor a 1.0103 - Cor a 1.0401 - Cor a_pollen - Fag s 1 - Fel d 1 - Fel d 2 - Fel d 4 - Fel d 7 - Fra a 1+3 - Mal d 1 - Mus m 1 - Phl p 5.0101 - Phl p 6,1
Alt a 1 - Ana o - Ana o 2 - Ber e - Car i - Cic a - Cor a 11 - Cor a 9 - Cor a_pollen - Cuc p - Gly m 5 - Gly m 6 - Hel a - Jug r 4 - Len c - Pap s - Pop n - Pru du - Sec c_flour - Sin - Sin a 1,1
Aln g 1 - Alt a 1 - Amb a - Amb a 1 - Ara h 8 - Art v 1 - Bet v 1 - Cor a 1.0103 - Cor a 1.0401 - Cor a_pollen - Der f 1 - Fag s 1 - Fel d 1 - Fra a 1+3 - Gly m 4 - Mal d 1,1
Alt a 1 - Amb a - Amb a 1 - Bet v 2 - Cuc m 2 - Der f 2 - Der p 2 - Der p 23 - Fel d 1 - Hev b 8 - Lep d 2 - Mer a 1 - Phl p 12 - Pho d 2,1
Alt a 1 - Bet v 1 - Cor a 1.0401 - Der f 1 - Der f 2 - Der p 1 - Der p 2 - Der p 23 - Der p 5 - Der p 7 - Fag s 1 - Fel d 1 - Fra a 1+3 - Lep d 2 - Phl p 5.0101 - Phl p 6 - Sec c_pollen - Ves v 5,1
Aln g 1 - Alt a 1 - Amb a - Amb a 1 - Bet v 1 - Bet v 2 - Cor a 1.0103 - Cuc m 2 - Cyn d - Cyn d 1 - Fag s 1 - Fra a 1+3 - Hev b 8 - Lol p 1 - Mal d 1 - Mer a 1 - Phl p 1 - Phl p 12 - Pho d 2,1
Alt a 1 - Amb a - Amb a 1 - Bet v 1 - Can f_male urine - Cor a 1.0103 - Cry j 1 - Cyn d - Cyn d 1 - Fag s 1 - Fel d 1 - Jug r_pollen - Lol p 1 - Pas n - Phl p 1 - Phl p 2 - Phl p 5.0101 - Phl p 6 - Phl p 7 - Phr c - Pla l - Pop n - Sal k - Sec c_pollen - Ves v 5,1
Aln g 1 - Alt a 1 - Amb a - Amb a 1 - Api g 1 - Ara h 8 - Art v - Art v 1 - Bet v 1 - Can f 1 - Can f 3 - Can f_Fd1 - Can f_male urine - Cla h 8 - Cor a 1.0103 - Cor a 1.0401 - Cor a_pollen - Cry j 1 - Dau c - Dau c 1 - Der f 1 - Der f 2 - Der p 2 - Fag s 1 - Fel d 1 - Fel d 2 - Fra a 1+3 - Gly m 4 - Jug r_pollen - Lep d 2 - Loc m - Lol p 1 - Mal d 1 - Mus m 1 - Ory c 3 - Phl p 1 - Phl p 2 - Phl …
Aca s - Ach d - Amb a 1 - Ani s 3 - Ara h 1 - Ara h 2 - Ara h 6 - Arg r 1 - Bla g 2 - Blo t 10 - Blo t 21 - Can f 2 - Can f 4 - Chi spp. - Cla h - Cor a 12_RUO - Cra c 6 - Cyn d - Cyn d 1 - Cyp c 1 - Der f 1 - Der f 2 - Der p 1 - Der p 10 - Der p 2 - Der p 23 - Der p 5 - Equ c 3 - Equ c 4 - Fel d 1 - Fel d 2 - Fel d 4 - Gad m 1 - Gal d 1 - Gly d 2 - Gly m 4 - Gly m 6 - Hev b 11 - Hom g - Lep d 2 …
Alt a 1 - Amb a - Amb a 1 - Amb a 4 - Art v - Art v 1 - Blo t 5 - Can f 6 - Can f_Fd1 - Can f_male urine - Cra c 6 - Cry j 1 - Fel d 1 - Fel d 2 - Mus m 1 - Ory c 2 - Ory c 3 - Rat n - Sus d 1 - Ves v 5,1
Aln g 1 - Alt a 1 - Bet v 1 - Can f_Fd1 - Fag s 1 - Fel d 1 - Lol p 1 - Phl p 1,1
Aln g 1 - Alt a 1 - Amb a - Amb a 1 - Amb a 4 - Art v - Art v 1 - Bet v 1 - Can f 1 - Can f_Fd1 - Clu h - Clu h 1 - Cor a 1.0103 - Cor a 1.0401 - Cor a_pollen - Cry j 1 - Cyn d - Cyn d 1 - Cyp c 1 - Der f 1 - Der f 2 - Der p 2 - Fag s 1 - Fel d 1 - Fel d 4 - Fel d 7 - Fra a 1+3 - Gad m - Gad m 1 - Gal d 2 - Gal d_white - Jug r_pollen - Lol p 1 - Ost e - Pan b - Phl p 1 - Sal s - Sal s 1 - Sco s 1…
Alt a 1 - Api m - Api m 1 - Api m 10 - Cla h 8 - Phl p 2,1
All c - Der f 2 - Der p 2 - Mala s 6 - Phl p 1 - Ves v - Ves v 5,1
Aln g 1 - Amb a - Amb a 1 - Api g 1 - Ara h 8 - Bet v 1 - Bet v 6 - Can f 4 - Can f_Fd1 - Can f_male urine - Cor a 1.0103 - Cor a 1.0401 - Cor a_pollen - Dau c - Dau c 1 - Der f 1 - Fag s 1 - Fel d 1 - Fra a 1+3 - Gly m 4 - Jug r_pollen - Mal d 1 - Pop n - Pyr c - Sac c - Ulm c,1
Aca m - Aca s - Ach d - Ani s 3 - Arg r 1 - Bet v 1 - Blo t 10 - Chi spp. - Cuc p - Der f 2 - Der p 10 - Der p 2 - Der p 23 - Gly d 2 - Hom g - Lep d 2 - Lit s - Loc m - Lol p 1 - Lol spp. - Mala s 5 - Mus m 1 - Myt e - Ost e - Pan b - Pen m 1 - Per a - Per a 7 - Phl p 1 - Rud spp. - Sol spp. - Ten m - Tyr p 2 - Ves v - Ves v 5,1
Alt a 1 - Amb a - Amb a 1 - Amb a 4 - Can f_Fd1 - Cry j 1 - Fel d 1,1
Aln g 1 - Alt a 1 - Amb a - Amb a 1 - Ara h 8 - Ara h 9 - Art v 1 - Bet v 1 - Bet v 2 - Clu h 1 - Cor a 1.0103 - Cor a 1.0401 - Cor a_pollen - Cuc m 2 - Cyp c 1 - Der f 2 - Der p 2 - Fag s 1 - Fel d 1 - Fra a 1+3 - Gad m - Gad m 1 - Gly m 4 - Hev b 8 - Jug r_pollen - Lep d 2 - Mal d 1 - Mer a 1 - Ory c 3 - Phl p 12 - Pho d 2 - Pop n - Sal k 1 - Sal s 1 - Sco s 1 - Sec c_flour - Thu a 1 - Xip g 1,1
Alt a 1 - Amb a - Amb a 1 - Amb a 4 - Bet v 1 - Clu h 1 - Cor a 1.0103 - Cry j 1 - Cyp c 1 - Der f 1 - Der p 1 - Fag s 1 - Fel d 1 - Fra a 1+3 - Gad m - Pha v - Phl p 2 - Pop n - Sal s 1 - Sco s 1 - Thu a 1 - Xip g 1,1
Alt a 1 - Amb a - Amb a 1 - Bet v 1 - Bet v 2 - Cor a 1.0103 - Cor a 1.0401 - Cuc m 2 - Fag s 1 - Fel d 1 - Fra a 1+3 - Mal d 1 - Pho d 2,1
Alt a 1 - Amb a - Amb a 1 - Bet v 1 - Can f 1 - Can f_Fd1 - Cor a 1.0401 - Cry j 1 - Fag s 1 - Fel d 1 - Fra a 1+3 - Phl p 2,1
Bla g 4 - Can f_male urine - Fel d 1 - Par j 2 - Pen ch - Pru p 3,1
Alt a 1 - Fel d 1 - Lol p 1 - Phl p 1,1
Alt a 1 - Api m 10,1
Alt a 1 - Amb a - Amb a 1 - Amb a 4 - Art v - Art v 1 - Bet v 2 - Can s - Cap a - Cry j 1 - Cuc m 2 - Cuc p - Cyn d - Cyn d 1 - Der f 2 - Der p 2 - Fel d 1 - Hev b 8 - Jug r_pollen - Lol p 1 - Mer a 1 - Pas n - Phl p 1 - Phl p 12 - Phl p 2 - Phl p 5.0101 - Phl p 6 - Pho d 2 - Phr c - Sec c_pollen - Ulm c,1
Alt a 1 - Cuc p - Pha v - Pop n - Sec c_flour,1
Aca m - Aca s - Act d 2 - Ail a - All s - Aln g 1 - Alt a 1 - Ama r - Api g 1 - Ara h 8 - Bet v 1 - Bet v 2 - Bla g 4 - Bro pa - Cap a - Car i - Che q - Cic a - Cit s - Cor a 1.0103 - Cor a 1.0401 - Cor a 11 - Cor a_pollen - Cry j 1 - Cuc m 2 - Cuc p - Cup a 1 - Cup s - Cyn d - Cyn d 1 - Dau c - Dau c 1 - Der f 1 - Der f 2 - Der p 1 - Der p 2 - Der p 23 - Fag e - Fag s 1 - Fic b - Fic c - Fra a 1…
Act d 10 - Alt a 1 - Amb a - Amb a 1 - Amb a 4 - Ara h 9 - Art v - Art v 1 - Asp f 3 - Bla g 4 - Can f 1 - Can f 2 - Can f 4 - Can f 6 - Can f_Fd1 - Can f_male urine - Cav p 1 - Cla h - Cry j 1 - Cup a 1 - Cyn d - Der f 1 - Fel d 1 - Fel d 4 - Fra a 1+3 - Mal d 3 - Mes a 1_RUO - Ory c 1 - Par j 2 - Phl p 2 - Phr c - Pla a 3 - Pru p 3 - Sec c_pollen - Ves v 5 - Zea m 14,1
Aln g 1 - Amb a - Api g 1 - Ara h 8 - Art v - Art v 1 - Asp f 6 - Bet v 1 - Cor a 1.0103 - Cor a 1.0401 - Cor a_pollen - Cyn d - Dau c - Dau c 1 - Fag s 1 - Fel d 1 - Fra a 1+3 - Gly m 4 - Lol p 1 - Mal d 1 - Mala s 11 - Phl p 1 - Phod s 1 - Pyr c - Sec c_pollen,1
Act d 2 - Alt a 1 - Cuc p - Fel d 1 - Phl p 2 - Sec c_flour - Ves v 5,1
Alt a 1 - Amb a 1 - Blo t 5 - Cyn d - Cyn d 1 - Der f 1 - Der f 2 - Der p 1 - Der p 2 - Der p 21 - Der p 5 - Der p 7 - Fel d 1 - Fel d 4 - Lep d 2 - Lol p 1 - Phl p 1 - Phl p 2,1
Alt a 1 - Can f_Fd1 - Der f 1 - Der p 1 - Fel d 1,1
Alt a 1 - Cuc p - Cup a 1 - Pha v - Phl p 2 - Pop n,1
Ach d - Ana o 2 - Che a 1 - Cla h - Cla h 8 - Cor a 14 - Cyn d - Cyn d 1 - Fag s 1 - Fra a 1+3 - Hev b 6.02 - Loc m - Pis v 4_RUO - Pla l 1 - Pru p 7_RUO - Ten m,1
Aca s - Alt a 1 - Amb a 1 - Der f 1 - Der f 2 - Der p 1 - Der p 2 - Der p 23 - Gly d 2 - Lep d 2 - Tyr p,1
Act d 2 - Alt a 1 - Amb a - Amb a 1 - Bet v 2 - Cuc m 2 - Fel d 1 - Mer a 1 - Phl p 1 - Phl p 12 - Pho d 2,1
Aln g 1 - Alt a 1 - Ama r - Amb a - Amb a 1 - Api g 1 - Ara h 8 - Bet v 1 - Bet v 2 - Bet v 6 - Bos d 6 - Can f 3 - Can f_male urine - Cap h_epithelia - Cor a 1.0103 - Cor a 1.0401 - Cor a_pollen - Cry j 1 - Cuc m 2 - Cyn d - Cyn d 1 - Dau c - Dau c 1 - Equ c 3 - Fag s 1 - Fel d 1 - Fel d 2 - Fra a 1+3 - Gly m 4 - Hev b 8 - Jug r_pollen - Lol p 1 - Mal d 1 - Mala s 6 - Mer a 1 - Phl p 1 - Phl p 1…
Ach d - Alt a 1 - Ani s 3 - Blo t 10 - Chi spp. - Der p 10 - Der p 23 - Fel d 1 - Hom g - Lit s - Loc m - Lol p 1 - Pan b - Par j 2 - Pen m 1 - Per a 7 - Phl p 1 - Ten m,1
Alt a 1 - Amb a - Amb a 1 - Cry j 1 - Phl p 2,1
Alt a 1 - Gal d_meat,1
Alt a 1 - Amb a - Amb a 1 - Bos d 6 - Can f 1 - Can f 3 - Can f 6 - Can f_Fd1 - Cry j 1 - Cyn d - Cyn d 1 - Der f 1 - Der p 1 - Equ c 3 - Equ c_meat - Equ c_milk - Fel d 1 - Fel d 2 - Fel d 4 - Fel d 7 - Lol p 1 - Mus m 1 - Ory_meat - Ovi a_meat - Pan b - Phl p 1 - Rat n - Sec c_flour - Sin a 1 - Sus d 1 - Sus d_epithelia,1
Alt a 1 - Amb a - Amb a 1 - Can f 1 - Can f 6 - Equ c 1 - Fel d 1 - Fel d 7,1
All s - Alt a 1 - Alt a 6 - Amb a - Amb a 1 - Amb a 4 - Art v - Art v 1 - Can f 1 - Cla h - Cla h 8 - Der f 2 - Der p 2 - Der p 23 - Fel d 1 - Gly d 2 - Mus m 1 - Phl p 2 - Rat n,1
Alt a 1 - Amb a - Amb a 1 - Can f 1 - Can f 4 - Der f 1 - Der f 2 - Der p 1 - Der p 2 - Fel d 1 - Fel d 7 - Fra e - Fra e 1 - Jug r_pollen - Lol p 1 - Ole e 1 - Phl p 1 - Phl p 2,1
Aca m - Act d 10 - Ail a - All s - Aln g 1 - Alt a 1 - Ama r - Amb a - Amb a 1 - Amb a 4 - Ara h 8 - Ara h 9 - Art v - Art v 1 - Art v 3 - Bet v 1 - Bro pa - Can f 1 - Can f 6 - Can f_Fd1 - Can s 3 - Cap a - Car p - Cic a - Cor a 1.0103 - Cor a 1.0401 - Cor a 11 - Cor a 8 - Cor a_pollen - Cry j 1 - Cup a 1 - Cup s - Cyn d - Dau c - Dau c 1 - Der f 2 - Der p 2 - Der p 23 - Equ c 1 - Fag s 1 - Fel …
Ach d - Aln g 1 - Alt a 1 - Amb a - Amb a 1 - Amb a 4 - Ani s 3 - Bet v 1 - Blo t 10 - Chi spp. - Cor a 1.0103 - Cor a 1.0401 - Der p 10 - Fag s 1 - Fel d 1 - Fra a 1+3 - Gly m 4 - Hom g - Lit s - Loc m - Mal d 1 - Ory c 3 - Pen m 1 - Per a 7 - Phl p 1 - Phl p 5.0101 - Ten m,1
Aca m - Aln g 1 - Alt a 6 - Ama r - Amb a - Amb a 1 - Api g 1 - Ara h 1 - Ara h 2 - Ara h 6 - Ara h 8 - Art v - Bet v 1 - Bet v 2 - Bla g 9 - Can f_male urine - Car i - Clu h - Clu h 1 - Cor a 1.0103 - Cor a 1.0401 - Cor a 14 - Cor a_pollen - Cry j 1 - Cuc m 2 - Cuc p - Cup a 1 - Cyn d - Cyn d 1 - Cyp c 1 - Dau c - Dau c 1 - Der f 2 - Der p 2 - Der p 20 - Fag s 1 - Fel d 1 - Fra a 1+3 - Gad m - G…
Aca s - Ach d - Alt a 1 - Ani s 3 - Blo t 10 - Chi spp. - Der p 10 - Hom g - Lit s - Loc m - Lol spp. - Myt e - Ory c 3 - Ost e - Pan b - Pec spp. - Pen m 1 - Per a - Per a 7 - Phl p 2 - Rud spp. - Sol spp. - Ten m,1
Ach d - Alt a 1 - Amb a - Amb a 1 - Can f 1 - Can f 4 - Cic a - Cla h - Cla h 8 - Cyn d - Cyn d 1 - Fel d 1 - Loc m - Lol p 1 - Phl p 1 - Phl p 2 - Ten m,1
Alt a 1 - Amb a - Amb a 1 - Bet v 2 - Cry j 1 - Cuc m 2 - Fel d 1 - Hev b 8 - Mer a 1 - Phl p 12 - Phl p 2 - Pho d 2,1
Aln g 1 - Alt a 1 - Amb a - Amb a 1 - Ana o - Ana o 3 - Art v - Art v 1 - Bet v 1 - Cor a 1.0103 - Cor a 1.0401 - Cor a_pollen - Cyn d - Cyn d 1 - Fag s 1 - Fra a 1+3 - Lol p 1 - Mal d 1 - Phl p 1,1
Alt a 1 - Amb a 1 - Can f 2 - Can f 4 - Can f 6 - Can f_male urine - Cyn d - Cyn d 1 - Der f 1 - Der p 1 - Der p 23 - Equ c 1 - Fel d 1 - Fel d 4 - Fel d 7 - Lol p 1 - Pas n - Phl p 1 - Phl p 5.0101 - Rat n - Sec c_flour,1
Alt a 1 - Cry j 1 - Cuc p - Cyn d - Cyn d 1 - Lol p 1 - Pas n - Phl p 1 - Phl p 2,1
Alt a 1 - Can f_male urine - Cuc p - Pop n - Sec c_flour,1
Aca m - Act d 10 - Ail a - Aln g 1 - Alt a 1 - Ama r - Amb a - Amb a 1 - Amb a 4 - Api g 1 - Api g 2 - Api g 6 - Api m - Api m 1 - Ara h 1 - Ara h 2 - Ara h 8 - Ara h 9 - Art v - Art v 1 - Art v 3 - Ber e - Bet v 1 - Bet v 2 - Bet v 6 - Can f 1 - Can f_Fd1 - Can s - Can s 3 - Cap a - Car c - Car i - Che q - Cic a - Cit s - Cor a 1.0103 - Cor a 1.0401 - Cor a 11 - Cor a 8 - Cor a_pollen - Cry j 1 …
Alt a 1 - Amb a - Amb a 1 - Can f 2 - Can f 3 - Can f 6 - Cry j 1 - Fel d 1 - Fel d 2 - Phl p 2 - Pop n - Sec c_flour - Sus d 1,1
Alt a 1 - Bla g 9 - Cry j 1 - Fel d 1 - Jug r 2 - Pen m 2 - Phl p 5.0101 - Phl p 6 - Sec c_pollen,1
Ach d - Asp f 1 - Bla g 9 - Der f 1 - Der f 2 - Der p 1 - Der p 2 - Der p 20 - Der p 21 - Der p 23 - Der p 5 - Der p 7 - Gal d_meat - Gly d 2 - Lep d 2 - Pen m 2 - Ten m - Tyr p 2,1
Aca s - Act d 10 - Act d 2 - Alt a 1 - Amb a - Amb a 1 - Amb a 4 - Api g 2 - Ara h 9 - Art v - Art v 1 - Art v 3 - Asp f 6 - Blo t 21 - Blo t 5 - Can f 1 - Can s 3 - Cap a - Car p - Clu h - Clu h 1 - Cor a 8 - Cyn d - Cyp c 1 - Der f 2 - Der p 2 - Der p 21 - Der p 23 - Der p 5 - Der p 7 - Fag e - Fel d 7 - Fra a 1+3 - Gad m - Gad m 1 - Gly d 2 - Jug r 3 - Lep d 2 - Mal d 3 - Mala s 11 - Ory c 3 -…
Aca s - Ach d - Act d 1 - Alt a 1 - Ama r - Amb a - Amb a 1 - Api g 1 - Api m - Ave s - Ber e - Bet v 1 - Bet v 2 - Cam d - Can f 3 - Can f_Fd1 - Cap a - Cic a - Cit s - Cry j 1 - Cuc m 2 - Der f 1 - Der p 1 - Der p 23 - Fag e - Fel d 1 - Hev b 8 - Jug r_pollen - Mer a 1 - Phl p 12 - Pho d 2,1
Alt a 1 - Api m - Api m 1 - Api m 10 - Bla g 9 - Cla h 8 - Der p 20 - Hom g - Phl p 5.0101 - Phl p 6 - Sec c_pollen,1
Aln g 1 - Alt a 1 - Amb a 1 - Api g 1 - Art v - Art v 1 - Bet v 1 - Bet v 2 - Cor a 1.0103 - Cor a 1.0401 - Cor a_pollen - Cuc m 2 - Cyn d - Cyn d 1 - Dau c - Dau c 1 - Fag s 1 - Fel d 1 - Fra a 1+3 - Hev b 8 - Jug r_pollen - Lol p 1 - Mal d 1 - Mer a 1 - Phl p 1 - Phl p 12 - Pho d 2,1
Aln g 1 - Alt a 1 - Api g 1 - Bet v 1 - Cor a 1.0103 - Cor a 1.0401 - Cor a_pollen - Dau c 1 - Fag s 1 - Fel d 1 - Fra a 1+3 - Mal d 1 - Phl p 1 - Phl p 2 - Pop n - Sec c_flour,1
Alt a 1 - Amb a 1 - Bos d_meat - Clu h - Equ c_meat - Gal d_meat - Mus m 1 - Ory_meat - Ovi a_meat - Phl p 2 - Raj c - Rat n - Sco s - Sus d_meat - Thu a,1
Alt a 1 - Bla g 9 - Der p 20 - Lol p 1 - Phl p 1,1
Aca m - Alt a 1 - Ama r - Amb a - Amb a 1 - Cla h 8 - Mala s 6 - Phl p 2 - Ses i 1 - Ves v 5,1
Alt a 1 - Asp f 3 - Bet v 1 - Can f 1 - Can f 4 - Can f 6 - Can f_Fd1 - Equ c 1 - Fag s 1 - Fel d 1 - Fel d 4 - Fel d 7 - Lol p 1 - Mus m 1 - Ost e - Phl p 1 - Phl p 2 - Rat n,1
Alt a 1 - Cyn d 1 - Der f 2 - Der p 2 - Lep d 2 - Lol p 1 - Phl p 1,1
Alt a 1 - Bla g 2 - Bla g 4 - Pha v - Pop n - Sec c_flour,1
Aca s - Act d 2 - Amb a - Amb a 1 - Blo t 21 - Can f 1 - Can f_Fd1 - Cyn d - Cyn d 1 - Der f 1 - Der f 2 - Der p 1 - Der p 2 - Der p 21 - Der p 23 - Fel d 1 - Fel d 7 - Lol p 1 - Mala s 5 - Pas n - Phl p 1 - Phl p 2 - Phr c - Sal s - Sec c_pollen - Sol spp. - Tyr p,1
Cla h - Cla h 8 - Fel d 1 - Pha v - Phl p 1 - Pop n,1
Alt a 1 - Amb a - Amb a 1 - Bet v 2 - Cry j 1 - Cuc m 2 - Cup a 1 - Cyn d - Cyn d 1 - Fel d 1 - Hev b 8 - Jug r_pollen - Lol p 1 - Mer a 1 - Pas n - Phl p 1 - Phl p 12 - Phl p 2 - Phl p 5.0101 - Phl p 6 - Pho d 2 - Pop n - Raj c - Sec c_pollen,1
Act d 2 - Alt a 1 - Asp f 3 - Bet v 1 - Bos d 5 - Can f_male urine - Cyn d - Cyn d 1 - Gal d 2 - Gal d_white - Lol p 1 - Pas n - Phl p 1 - Phl p 2 - Phr c - Sec c_pollen - Sola l,1
Alt a 1 - Amb a 1 - Asp f 6 - Bet v 1 - Can f 4 - Can f 6 - Can f_Fd1 - Cry j 1 - Cuc p - Cyn d - Cyn d 1 - Der p 1 - Equ c 1 - Fel d 1 - Fel d 7 - Lol p 1 - Mala s 11 - Par j 2 - Pas n - Phl p 1 - Phl p 2 - Phl p 5.0101 - Phl p 6 - Pho d 2 - Sec c_pollen - Ves v 5,1
Aln g 1 - Alt a 1 - Amb a 1 - Ana o - Ana o 3 - Api g 1 - Ara h 8 - Ara h 9 - Art v 3 - Ber e - Bet v 1 - Bet v 2 - Bla g 9 - Bos d 5 - Bos d 6 - Bos d 8 - Bos d_milk - Can f_Fd1 - Cap h_epithelia - Cap h_milk - Car i - Cic a - Clu h - Clu h 1 - Cor a 1.0103 - Cor a 1.0401 - Cor a 11 - Cor a 14 - Cor a 9 - Cor a_pollen - Cuc m 2 - Cyp c 1 - Dau c 1 - Fag e - Fag s 1 - Fel d 1 - Fra a 1+3 - Gad m …
Alt a 1 - Ama r - Amb a - Amb a 1 - Amb a 4 - Art v - Art v 1 - Bet v 2 - Can s - Cit s - Cry j 1 - Cuc m 2 - Cyn d - Hev b 8 - Jug r_pollen - Mer a 1 - Mor r - Phl p 12 - Pho d 2 - Pyr c - Sec c_pollen,1
Api m - Api m 1 - Asp f 3,1
Alt a 1 - Cav p 1 - Cyn d - Cyn d 1 - Lol p 1 - Pas n - Phl p 1,1
Aca s - Ach d - Ani s 3 - Api m - Api m 10 - Ara h 6 - Asp f 4 - Bla g 9 - Blo t 10 - Blo t 5 - Can f 2 - Chi spp. - Cla h - Cra c 6 - Der f 2 - Der p 10 - Der p 2 - Der p 20 - Der p 21 - Der p 23 - Der p 5 - Hom g - Lep d 2 - Lit s - Loc m - Lol spp. - Myt e - Ost e - Pan b - Pec spp. - Pen m 1 - Pen m 2 - Per a - Per a 7 - Phl p 7 - Rud spp. - Ten m - Tyr p,1
Alt a 1 - Amb a - Amb a 1 - Cry j 1 - Phl p 5.0101 - Phl p 6 - Sec c_pollen,1
Alt a 1 - Bet v 1 - Cor a 1.0103 - Cor a 1.0401 - Fag s 1 - Lol p 1 - Mal d 1 - Phl p 1 - Sal k 1 - Sec c_flour,1
Ach d - Loc m - Mala s 6 - Ten m,1
Ach d - Ana o 2 - Ana o 3 - Api g 2 - Api m - Art v 3 - Asp f 1 - Che a 1 - Cla h - Cla h 8 - Cor a 14 - Cyn d 1 - Equ c 4 - Fag s 1 - Hev b 6.02 - Jug r 1 - Loc m - Mal d 3 - Pis v 4_RUO - Pla l 1 - Pru p 7_RUO - Ten m,1
Amb a 4 - Art v - Art v 1 - Asp f 6 - Bet v 1 - Can f 1 - Can f 4 - Fag s 1 - Fel d 1 - Fel d 7 - Mala s 11 - Ory c 3,1
Ail a - Alt a 1 - Amb a - Amb a 1 - Api g 6 - Art v - Bet v 1 - Bet v 2 - Bla g 9 - Can f 1 - Can f 6 - Cap a - Cry j 1 - Cuc m 2 - Cup a 1 - Cyn d - Cyn d 1 - Der f 1 - Der f 2 - Der p 1 - Der p 2 - Der p 20 - Der p 23 - Fag s 1 - Fel d 1 - Hev b 8 - Jug r_pollen - Lep d 2 - Lol p 1 - Mer a 1 - Pas n - Pen m 2 - Phl p 1 - Phl p 12 - Pho d 2 - Pop n - Sal k - Sec c_flour,1
Aln g 1 - Alt a 1 - Amb a - Amb a 1 - Amb a 4 - Api m - Api m 1 - Ara h 8 - Art v - Art v 1 - Bet v 1 - Can f_Fd1 - Can f_male urine - Cor a 1.0103 - Cor a 1.0401 - Cor a_pollen - Cry j 1 - Cyn d - Cyn d 1 - Der f 1 - Der f 2 - Der p 1 - Der p 2 - Der p 21 - Der p 23 - Fag s 1 - Fel d 1 - Fra a 1+3 - Gly m 4 - Lep d 2 - Lol p 1 - Mal d 1 - Pas n - Phl p 1 - Phl p 5.0101 - Phl p 6 - Pop n - Sal k …
Alt a 1 - Amb a - Amb a 1 - Amb a 4 - Api g 6 - Art v - Bet v 2 - Cic a - Cry j 1 - Cuc m 2 - Fel d 1 - Hel a - Hev b 8 - Jug r_pollen - Mer a 1 - Pas n - Pha v - Phl p 12 - Pho d 2 - Phr c - Sal k - Sec c_pollen - Ulm c - Urt d,1
Alt a 1 - Cyn d - Cyn d 1 - Der f 1 - Der f 2 - Der p 1 - Der p 2 - Der p 23 - Der p 7 - Fel d 1 - Gly d 2 - Lep d 2 - Lol p 1 - Phl p 1 - Vac m,1
Alt a 1 - Amb a - Amb a 1 - Api m 10 - Cry j 1 - Cyn d 1 - Der f 1 - Der f 2 - Der p 1 - Der p 2 - Der p 23 - Der p 5 - Gly d 2 - Lep d 2 - Tyr p 2,1
Alt a 1 - Amb a - Amb a 1 - Amb a 4 - Bet v 1 - Can f 6,1
Aln g 1 - Alt a 1 - Amb a - Amb a 1 - Ara h 8 - Bet v 1 - Can f_male urine - Cor a 1.0103 - Cor a 1.0401 - Cor a_pollen - Cry j 1 - Cyn d - Cyn d 1 - Der f 1 - Der f 2 - Der p 1 - Der p 2 - Fag s 1 - Fra a 1+3 - Gly m 4 - Lep d 2 - Lol p 1 - Mal d 1 - Phl p 1,1
Alt a 1 - Amb a - Amb a 1 - Bet v 1 - Can f 1 - Can f_male urine - Cor a 1.0103 - Cry j 1 - Cyn d - Cyn d 1 - Fel d 4 - Fel d 7 - Lol p 1 - Mal d 1 - Phl p 1 - Phl p 5.0101 - Phl p 6 - Sec c_pollen,1
Ach d - Aln g 1 - Alt a 1 - Amb a - Amb a 1 - Api g 1 - Bet v 1 - Cor a 1.0103 - Cor a 1.0401 - Cor a_pollen - Cry j 1 - Fag s 1 - Fel d 1 - Loc m - Lol p 1 - Mal d 1 - Pas n - Phl p 1 - Phl p 2 - Ten m,1
Ach d - Alt a 1 - Amb a - Amb a 1 - Cry j 1 - Phl p 2 - Ten m,1
Act d 1 - Aln g 1 - Alt a 1 - Api g 1 - Ara h 9 - Bet v 1 - Bla g 9 - Can f 1 - Cor a 1.0103 - Cor a 1.0401 - Cor a_pollen - Dau c - Dau c 1 - Der f 1 - Der f 2 - Der p 1 - Der p 2 - Fag s 1 - Fel d 1 - Fel d 7 - Fra a 1+3 - Lep d 2 - Mal d 1 - Pen m 2 - Ves v 5 - Zea m - Zea m 14,1
Act d 5 - Aln g 1 - Alt a 1 - Alt a 6 - Amb a - Amb a 1 - Ana o 3 - Ani s 1 - Ani s 3 - Ara h 1 - Ara h 6 - Art v 1 - Bet v 1 - Bla g 2 - Bla g 9 - Blo t 10 - Blo t 21 - Bos d 4 - Bos d 5 - Can f 1 - Can f 2 - Can f 4 - Can f 6 - Che q - Cic a - Cla h - Cla h 8 - Cor a 1.0103 - Cra c 6 - Cyn d - Cyn d 1 - Cyp c 1 - Dau c - Dau c 1 - Der p 1 - Der p 10 - Der p 5 - Der p 7 - Equ c 1 - Equ c 3 - Equ…
Aca s - Ach d - Aln g 1 - Asp f 3 - Asp f 6 - Bet v 1 - Bet v 6 - Bla g 4 - Bla g 9 - Can f 2 - Can f 4 - Can f_Fd1 - Cor a 1.0103 - Cor a 1.0401 - Cor a_pollen - Der p 20 - Fag s 1 - Fel d 1 - Fra a 1+3 - Loc m - Mal d 1 - Mala s 11 - Mala s 5 - Mala s 6 - Mes a 1_RUO - Ost e - Par j 2 - Pen m 2 - Sac c - Ten m - Tyr p,1
Ach d - Act d 10 - All s - Aln g 1 - Alt a 1 - Ama r - Amb a - Amb a 1 - Amb a 4 - Api g 1 - Ara h 1 - Ara h 9 - Art v - Art v 1 - Asp f 3 - Bet v 1 - Bet v 2 - Bla g 4 - Can f 1 - Can f 4 - Can f 6 - Can f_male urine - Can s 3 - Car i - Cor a 1.0103 - Cor a 1.0401 - Cor a 11 - Cor a 8 - Cor a_pollen - Cry j 1 - Cuc m 2 - Cup a 1 - Cyn d - Cyn d 1 - Dau c - Dau c 1 - Der f 2 - Der p 2 - Equ c 1 -…
Asp f 3 - Can f_male urine,1
Alt a 1 - Amb a 4 - Art v - Art v 1 - Cuc p - Cyn d - Cyn d 1 - Lol p 1 - Par j 2 - Pas n - Pha v - Phl p 1 - Phl p 5.0101 - Pop n - Sec c_flour - Sec c_pollen - Ves v 5,1
Ach d - Act d 1 - Amb a - Amb a 1 - Amb a 4 - Ara h 15 - Art v - Art v 1 - Asp f 4 - Asp f 6 - Bet v 1 - Bla g 4 - Bos d_meat - Can f 1 - Can f 4 - Can f 6 - Can f_male urine - Cav p 1 - Cor a 1.0103 - Cor a 1.0401 - Dau c - Der p 7 - Fag s 1 - Fel d 1 - Fel d 4 - Fel d 7 - Fra a 1+3 - Gal d 2 - Gal d_white - Gly m 4 - Loc m - Lol p 1 - Mal d 1 - Mala s 11 - Mala s 5 - Par j 2 - Pas n - Pen ch - …
Asp f 6 - Clu h - Clu h 1 - Cyp c 1 - Fel d 1 - Gad m - Gad m 1 - Mala s 11 - Sal s - Sal s 1 - Sco s 1 - Thu a 1 - Xip g 1,1
Alt a 1 - Amb a - Amb a 1 - Can s 3 - Cry j 1 - Fel d 1 - Lol p 1 - Phl p 1,1
Aca s - Ach d - Art v - Art v 1 - Blo t 21 - Blo t 5 - Can f 1 - Can f_Fd1 - Can f_male urine - Cav p 1 - Cra c 6 - Cyn d - Cyn d 1 - Cyp c 1 - Der f 1 - Der f 2 - Der p 1 - Der p 2 - Der p 21 - Der p 23 - Der p 5 - Der p 7 - Dol spp - Equ c 1 - Fel d 1 - Fel d 4 - Fel d 7 - Gly d 2 - Hom g - Lep d 2 - Loc m - Mala s 5 - Mes a 1_RUO - Mus m 1 - Per a 7 - Phl p 2 - Pol d - Pol d 5 - Sal s 1 - Sin …
Aln g 1 - Alt a 1 - Amb a - Amb a 1 - Api g 1 - Ara h 8 - Bet v 1 - Bet v 6 - Can f 1 - Can f 4 - Can f 6 - Can f_Fd1 - Can f_male urine - Cav p 1 - Cor a 1.0103 - Cor a 1.0401 - Cor a_pollen - Cyn d - Cyn d 1 - Dau c - Dau c 1 - Equ c 1 - Fag s 1 - Fel d 1 - Fel d 4 - Fel d 7 - Fra a 1+3 - Gly m 4 - Lol p 1 - Mal d 1 - Phl p 1 - Phl p 5.0101 - Phl p 6 - Pyr c - Rat n - Sec c_pollen - Sol t,1
Aln g 1 - Alt a 1 - Amb a - Amb a 1 - Amb a 4 - Api g 1 - Ara h 8 - Art v - Art v 1 - Bet v 1 - Can f 4 - Cav p 1 - Cor a 1.0103 - Cor a 1.0401 - Cor a_pollen - Dau c 1 - Der f 2 - Der p 2 - Der p 21 - Der p 23 - Fag s 1 - Fel d 1 - Fra a 1+3 - Gly m 4 - Lep d 2 - Lol p 1 - Mal d 1 - Phl p 1 - Phl p 5.0101 - Phl p 6 - Pla a 2 - Sec c_pollen - Urt d,1
Aln g 1 - Api g 1 - Ara h 8 - Asp f 6 - Bet v 1 - Can f 1 - Cor a 1.0103 - Cor a 1.0401 - Cor a_pollen - Cyn d - Cyn d 1 - Dau c - Dau c 1 - Fag s 1 - Fel d 1 - Fra a 1+3 - Gly m 4 - Lol p 1 - Mal d 1 - Mala s 11 - Pas n - Phl p 1 - Phl p 2 - Phr c - Sec c_pollen,1
Alt a 1 - Asp f 3 - Cla h - Cla h 8 - Fel d 1 - Fel d 4,1
Alt a 1 - Amb a 1 - Can f_Fd1 - Can f_male urine - Cla h 8 - Der f 1 - Der p 1 - Der p 21 - Der p 5 - Fel d 1 - Phl p 5.0101 - Phl p 6 - Pop n - Sec c_flour - Sec c_pollen,1
Act d 2 - Aln g 1 - Alt a 1 - Ama r - Ara h 9 - Bet v 1 - Can f_Fd1 - Che q - Cic a - Cor a 1.0103 - Cor a 1.0401 - Cor a 8 - Cor a_pollen - Fag e - Fag s 1 - Fel d 1 - Fra a 1+3 - Mal d 1 - Mal d 3 - Ole e 9 - Ory c 1 - Ory c 2 - Ory c 3 - Ory_meat - Pan m - Pha v - Phl p 2 - Phod s 1 - Pis s - Zea m - Zea m 14,1
Act d 10 - Aln g 1 - Alt a 1 - Amb a - Amb a 1 - Api g 2 - Ara h 9 - Art v - Art v 1 - Art v 3 - Bet v 1 - Bet v 2 - Can f_Fd1 - Can f_male urine - Cor a 1.0103 - Cry j 1 - Cuc m 2 - Cyn d - Cyn d 1 - Der f 1 - Der f 2 - Der p 1 - Der p 2 - Der p 23 - Fag s 1 - Fel d 1 - Fra a 1+3 - Hev b 8 - Lep d 2 - Lol p 1 - Mal d 3 - Mer a 1 - Phl p 1 - Phl p 12 - Pho d 2 - Pla a 3 - Pru p 3 - Zea m 14,1
Alt a 1 - Api g 1 - Bet v 1 - Cor a 1.0401 - Dau c - Dau c 1 - Fag s 1 - Fel d 1 - Fra a 1+3 - Phl p 5.0101 - Ves v 5,1
Alt a 1 - Amb a - Amb a 1 - Bet v 1 - Cor a 1.0401 - Cyn d 1 - Der f 1 - Der f 2 - Der p 1 - Der p 2 - Der p 21 - Der p 5 - Fel d 1 - Lep d 2 - Lol p 1 - Pas n - Phl p 1 - Phl p 2 - Ves v 5,1
Amb a - Amb a 1 - Bet v 1 - Blo t 5 - Can f 1 - Can f 2 - Can f 4 - Can f 6 - Can f_male urine - Che a 1 - Cla h 8 - Cor a 1.0103 - Cry j 1 - Cyn d - Cyn d 1 - Der f 1 - Der f 2 - Der p 1 - Der p 2 - Der p 21 - Der p 23 - Der p 5 - Der p 7 - Fag s 1 - Fel d 1 - Fel d 7 - Gly d 2 - Lep d 2 - Lol p 1 - Phl p 1 - Phl p 2 - Raj c - Ves v - Ves v 1 - Ves v 5,1
Ach d - Alt a 1 - Api m - Api m 1 - Api m 10 - Asp f 1 - Bla g 9 - Der p 20 - Loc m - Sin a 1 - Ten m,1
Alt a 1 - Amb a - Amb a 1 - Can f 1 - Can f_Fd1 - Cry j 1 - Fel d 1 - Fel d 7 - Lol p 1 - Phl p 1 - Phl p 5.0101 - Phl p 6 - Phod s 1 - Sec c_pollen,1
Act d 2 - Aln g 1 - Alt a 1 - Ama r - Ara h 9 - Bet v 1 - Can f_Fd1 - Che q - Cic a - Cor a 1.0103 - Cor a 1.0401 - Cor a 8 - Cor a_pollen - Fag e - Fag s 1 - Fel d 1 - Fra a 1+3 - Mal d 1 - Mal d 3 - Ole e 9 - Ory c 1 - Ory c 2 - Ory c 3 - Ory_meat - Phl p 2 - Phod s 1 - Pis s - Zea m - Zea m 14,1
Act d 2 - Aln g 1 - Alt a 1 - Ara h 9 - Bet v 1 - Can f_Fd1 - Che q - Cic a - Cor a 1.0103 - Cor a 1.0401 - Cor a 8 - Cor a_pollen - Fag e - Fag s 1 - Fel d 1 - Fra a 1+3 - Mal d 1 - Mal d 3 - Ole e 9 - Ory c 1 - Ory c 2 - Ory c 3 - Ory_meat - Phl p 2 - Phod s 1 - Pis s - Zea m - Zea m 14,1
Aln g 1 - Alt a 1 - Bet v 1 - Blo t 5 - Can f_Fd1 - Cor a 1.0103 - Cor a 1.0401 - Cor a_pollen - Der f 1 - Der f 2 - Der p 1 - Der p 2 - Der p 21 - Der p 23 - Der p 5 - Fag s 1 - Fel d 1 - Gly d 2 - Lep d 2 - Mal d 1 - Mes a 1_RUO - Ory c 3,1
Ach d - Alt a 1 - Ara h 1 - Art v 1 - Asp f 3 - Bla g 4 - Loc m - Phl p 2 - Pho d 2,1
Aca m - Ach d - Ail a - All s - Aln g 1 - Alt a 1 - Ama r - Amb a - Amb a 1 - Amb a 4 - Api g 1 - Ara h 8 - Art v - Art v 1 - Asp f 3 - Bet v 1 - Bet v 2 - Can f 1 - Can f 6 - Can f_Fd1 - Car i - Cor a 1.0103 - Cor a 1.0401 - Cor a 11 - Cor a_pollen - Cry j 1 - Cuc m 2 - Cup a 1 - Der f 2 - Der p 2 - Der p 5 - Equ c 1 - Fag e - Fag s 1 - Fel d 1 - Fel d 4 - Fel d 7 - Fra a 1+3 - Gal d 3 - Gal d 5…
Alt a 6 - Car i - Clu h 1 - Cyp c 1 - Gal d 2 - Gal d 3 - Gal d_white - Jug r 1 - Jug r 2 - Jug r 4 - Jug r 6 - Mala s 6 - Sco s 1 - Thu a 1,1
Alt a 1 - Amb a - Amb a 1 - Phl p 1,1
Aln g 1 - Amb a - Amb a 1 - Amb a 4 - Api g 1 - Ara h 8 - Art v - Art v 1 - Bet v 1 - Bla g 4 - Blo t 21 - Blo t 5 - Can f 1 - Can f_Fd1 - Can f_male urine - Cor a 1.0103 - Cor a 1.0401 - Cor a_pollen - Cyn d 1 - Dau c 1 - Der f 1 - Der f 2 - Der p 1 - Der p 2 - Der p 21 - Der p 5 - Fag s 1 - Fel d 1 - Fel d 7 - Gly m 4 - Jug r_pollen - Lep d 2 - Lol p 1 - Mal d 1 - Mala s 5 - Mala s 6 - Mes a 1_…
Aln g 1 - Alt a 1 - Ama r - Amb a - Amb a 1 - Amb a 4 - Ara h 8 - Ara h 9 - Art v - Art v 1 - Bet v 1 - Bet v 2 - Can f 1 - Can f_male urine - Che a 1 - Cor a 1.0103 - Cor a 1.0401 - Cor a_pollen - Cuc m 2 - Cyn d - Cyn d 1 - Dau c - Dau c 1 - Der f 1 - Der p 1 - Fag s 1 - Fel d 1 - Fra a 1+3 - Hev b 11 - Hev b 8 - Jug r_pollen - Lol p 1 - Mal d 1 - Mer a 1 - Mus a - Ory c 3 - Pen m 2 - Phl p 1 -…
Alt a 1 - Amb a - Amb a 1 - Can f 1 - Can f_Fd1 - Equ c 1 - Fel d 1 - Fel d 4 - Fel d 7 - Lol p 1 - Mus m 1 - Ory c 3 - Phl p 1 - Phl p 2,1
Ach d - Alt a 1 - Loc m - Pha v - Pop n - Sec c_flour - Ten m,1
Aca s - Alt a 6 - Blo t 5 - Can f 1 - Can f 6 - Can f_male urine - Cyn d - Cyn d 1 - Der f 2 - Der p 2 - Der p 21 - Der p 23 - Der p 5 - Der p 7 - Fel d 7 - Gly d 2 - Hev b 3 - Lep d 2 - Sol spp. - Tyr p - Tyr p 2,1
Ach d - Aln g 1 - Alt a 1 - Amb a - Amb a 1 - Amb a 4 - Art v - Art v 1 - Bet v 1 - Cor a 1.0103 - Cor a 1.0401 - Cor a_pollen - Fag s 1 - Fel d 1 - Fra a 1+3 - Gly m 4 - Mal d 1 - Ten m,1
Aln g 1 - Alt a 1 - Art v 1 - Bet v 1 - Bet v 2 - Can f 1 - Can f 4 - Can f 6 - Can f_male urine - Che q - Cor a 1.0103 - Cor a 1.0401 - Cor a_pollen - Cuc m 2 - Cuc p - Cyn d - Cyn d 1 - Dau c 1 - Equ c 1 - Fag s 1 - Fel d 1 - Fel d 4 - Hev b 8 - Jug r_pollen - Lol p 1 - Mal d 1 - Mer a 1 - Pas n - Pha v - Phl p 1 - Phl p 12 - Phl p 5.0101 - Phl p 6 - Pho d 2 - Pop n - Sal k - Sec c_flour - Sec …
Aca m - Ail a - Alt a 1 - Ama r - Amb a - Amb a 1 - Art v - Asp f 3 - Bet v 2 - Can f 1 - Can f 6 - Can f_Fd1 - Can f_male urine - Cic a - Cit s - Cor a_pollen - Cry j 1 - Cuc m 2 - Cup a 1 - Cyn d - Cyn d 1 - Der p 5 - Equ c 1 - Fel d 1 - Fel d 4 - Fel d 7 - Fra e - Hel a - Hev b 11 - Hev b 8 - Jug r_pollen - Lol p 1 - Mer a 1 - Mes a 1_RUO - Mus a - Mus m 1 - Ory c 3 - Pas n - Pers a - Phl p 1 …
Aca s - Ach d - Act d 5 - Alt a 1 - Amb a - Ani s 3 - Ara h 6 - Arg r 1 - Ber e 1 - Bla g 2 - Blo t 10 - Bos d 4 - Can f 2 - Can f 6 - Chi spp. - Cic a - Clu h - Cor a 12_RUO - Cra c 6 - Cyp c 1 - Der p 1 - Der p 10 - Der p 5 - Equ c 3 - Fel d 2 - Fel d 4 - Gal d 1 - Gly d 2 - Gly m 4 - Hom g - Lep d 2 - Lit s - Loc m - Lol spp. - Mal d 2 - Mus m 1 - Myt e - Ost e - Pan b - Pec spp. - Pen m 1 - P…
Alt a 1 - Ara h 8 - Bet v 1 - Can f 1 - Can f 4 - Can f_male urine - Cor a 1.0103 - Cor a 1.0401 - Cyn d - Cyn d 1 - Der f 1 - Der f 2 - Der p 1 - Der p 2 - Der p 23 - Der p 7 - Dol spp - Fag s 1 - Fel d 1 - Fra a 1+3 - Gly m 4 - Lep d 2 - Lol p 1 - Phl p 1 - Phl p 5.0101 - Phl p 6 - Sec c_pollen,1
Alt a 1 - Amb a 4 - Art v - Art v 1 - Asp f 3 - Fel d 1,1
Asp f 6 - Blo t 5 - Cav p 1 - Der f 1 - Der f 2 - Der p 1 - Der p 2 - Der p 21 - Der p 23 - Der p 5 - Gly d 2 - Lep d 2,1
Aln g 1 - Alt a 1 - Amb a - Amb a 1 - Ara h 8 - Bet v 1 - Can f 6 - Cor a 1.0103 - Cor a 1.0401 - Cor a_pollen - Fag s 1 - Fel d 1 - Fra a 1+3 - Mal d 1 - Phl p 2 - Phl p 5.0101 - Phl p 6 - Pol d 5 - Pop n - Pru av - Sec c_pollen - Ves v 5,1
Aln g 1 - Amb a - Amb a 1 - Api g 1 - Ara h 8 - Asp f 6 - Bet v 1 - Blo t 5 - Can f 1 - Can f 2 - Can f 3 - Can f 4 - Can f 6 - Can f_Fd1 - Can f_male urine - Clu h - Clu h 1 - Cor a 1.0103 - Cor a 1.0401 - Cor a_pollen - Cry j 1 - Cup a 1 - Cyn d - Cyn d 1 - Cyp c 1 - Dau c - Dau c 1 - Der f 1 - Der f 2 - Der p 1 - Der p 2 - Der p 21 - Der p 23 - Der p 5 - Der p 7 - Equ c 1 - Fag s 1 - Fel d 1 -…
Alt a 1 - Blo t 21 - Cyn d - Cyn d 1 - Der f 1 - Der f 2 - Der p 1 - Der p 2 - Der p 21 - Der p 23 - Der p 5 - Der p 7 - Gly d 2 - Lep d 2 - Lol p 1 - Pan b - Phl p 1 - Pop n - Sec c_flour,1
Alt a 1 - Cla h 8 - Fel d 1 - Ory c 3 - Phl p 2,1
Aca s - Ach d - Act d 1 - Aln g 1 - Amb a - Amb a 4 - Ani s 3 - Api g 6 - Art v - Art v 1 - Bet v 1 - Bla g 1 - Bla g 9 - Blo t 10 - Bos d 6 - Can f 1 - Can f 3 - Can f 6 - Can s - Cap h_epithelia - Car i - Chi spp. - Cic a - Clu h - Clu h 1 - Cor a 1.0103 - Cor a 1.0401 - Cor a 14 - Cor a_pollen - Cry j 1 - Cup a 1 - Cyn d - Cyn d 1 - Cyp c 1 - Der f 1 - Der f 2 - Der p 1 - Der p 10 - Der p 11 -…
Aln g 1 - Alt a 1 - Amb a - Amb a 1 - Amb a 4 - Api m - Api m 1 - Ara h 8 - Art v - Art v 1 - Bet v 1 - Cor a 1.0103 - Cor a 1.0401 - Cor a_pollen - Cuc p - Cyn d - Cyn d 1 - Fag s 1 - Fra a 1+3 - Gly m 4 - Jug r_pollen - Lol p 1 - Mal d 1 - Pas n - Phl p 1 - Phl p 5.0101 - Phl p 6 - Pop n - Sal k - Sec c_pollen - Urt d,1
Alt a 1 - Amb a - Amb a 1 - Fel d 1 - Ory c 2 - Ory c 3 - Phl p 5.0101 - Phod s 1,1
Ach d - Amb a - Amb a 1 - Asp f 6 - Bla g 4 - Can f 1 - Cry j 1 - Cyn d - Cyn d 1 - Fel d 1 - Fel d 7 - Lol p 1 - Mala s 11 - Mala s 5 - Pap s - Par j 2 - Pas n - Phl p 1 - Phr c,1
Ach d - Alt a 1 - Loc m - Ten m,1
Alt a 1 - Alt a 6 - Amb a - Amb a 1 - Cla h 8 - Fel d 7 - Lol p 1 - Phl p 1 - Phl p 2 - Phl p 5.0101,1
Aln g 1 - Alt a 1 - Amb a - Amb a 1 - Amb a 4 - Bet v 1 - Bet v 2 - Can f 1 - Cor a 1.0103 - Cor a 1.0401 - Cor a_pollen - Cry j 1 - Cuc m 2 - Cyn d - Cyn d 1 - Der f 2 - Der p 2 - Fag s 1 - Lol p 1 - Mal d 1 - Phl p 1 - Phl p 12 - Pho d 2,1
Aln g 1 - Amb a - Amb a 4 - Api g 1 - Art v - Art v 1 - Bet v 1 - Can f 1 - Can f 2 - Can f 4 - Cla h 8 - Cor a 1.0103 - Cor a 1.0401 - Cor a_pollen - Cyn d - Cyn d 1 - Dau c - Dau c 1 - Fag s 1 - Fel d 1 - Fel d 7 - Lol p 1 - Phl p 1,1
Aca s - Act d 1 - Act d 10 - All s - Api m - Api m 10 - Ara h 9 - Art v 3 - Asp f 1 - Ave s - Bos d 2 - Bos d 4 - Bos d 5 - Bos d 6 - Bos d 8 - Bos d_milk - Can f 3 - Can f 4 - Can f_Fd1 - Can s 3 - Cap h_epithelia - Cap h_milk - Cav p 1 - Chi spp. - Cic a - Cor a 8 - Der f 1 - Der p 1 - Der p 21 - Der p 23 - Der p 5 - Fel d 2 - Fra a 1+3 - Gal d 3 - Gal d 4 - Gal d 5 - Gal d_meat - Gal d_white -…
Aln g 1 - Alt a 1 - Amb a 4 - Art v - Art v 1 - Bet v 1 - Cor a 1.0103 - Cor a 1.0401 - Cyn d - Cyn d 1 - Fag s 1 - Fra a 1+3 - Lol p 1 - Mal d 1 - Pas n - Phl p 1 - Phl p 2 - Phl p 5.0101 - Phl p 6 - Phr c - Pru p 3 - Sec c_pollen,1
Alt a 1 - Amb a - Amb a 1 - Amb a 4 - Bet v 2 - Blo t 21 - Blo t 5 - Can f 1 - Can f_Fd1 - Can f_male urine - Cuc m 2 - Der f 1 - Der f 2 - Der p 1 - Der p 2 - Der p 21 - Der p 23 - Der p 5 - Fel d 1 - Fel d 4 - Fel d 7 - Gly d 2 - Hev b 8 - Jug r_pollen - Lep d 2 - Mer a 1 - Phl p 12 - Pho d 2 - Raj c,1
Alt a 1 - Bet v 1 - Blo t 5 - Cor a 1.0103 - Cor a 1.0401 - Cyn d - Cyn d 1 - Der f 1 - Der f 2 - Der p 1 - Der p 2 - Der p 21 - Der p 23 - Der p 5 - Fag s 1 - Fel d 1 - Lep d 2 - Lol p 1 - Phl p 1 - Phl p 5.0101 - Phl p 6 - Sec c_pollen,1
Ail a - Aln g 1 - Alt a 1 - Ama r - Api g 1 - Ara h 3 - Ara h 8 - Bet v 1 - Can f_Fd1 - Can f_male urine - Cap a - Cor a 1.0103 - Cor a 1.0401 - Cor a_pollen - Cyn d - Cyn d 1 - Dau c - Dau c 1 - Fag s 1 - Fel d 1 - Fra a 1+3 - Gly m 4 - Hor v - Lol p 1 - Mal d 1 - Mus a - Pas n - Pha v - Phl p 1 - Phl p 2 - Phl p 5.0101 - Phl p 6 - Phr c - Pop n - Sal k - Sec c_pollen,1
Alt a 1 - Can f_Fd1 - Fel d 1 - Fel d 4 - Fel d 7 - Phl p 2 - Pop n,1
Aln g 1 - Alt a 1 - Amb a - Amb a 1 - Api g 1 - Ara h 8 - Art v - Art v 1 - Art v 3 - Bet v 1 - Can f 6 - Can f_Fd1 - Can f_male urine - Can s 3 - Che a 1 - Cor a 1.0103 - Cor a 1.0401 - Cor a_pollen - Dau c - Dau c 1 - Der f 1 - Der f 2 - Der p 1 - Der p 2 - Der p 21 - Der p 23 - Der p 5 - Equ c 1 - Fag s 1 - Fel d 1 - Fra a 1+3 - Gly m 4 - Jug r 3 - Jug r_pollen - Lep d 2 - Mal d 1 - Mus m 1 - …
Alt a 1 - Ves v - Ves v 1 - Ves v 5,1
Aca s - Ana o 2 - Bla g 1 - Blo t 21 - Blo t 5 - Can f_male urine - Che a 1 - Cla h 8 - Cyn d - Cyn d 1 - Der f 1 - Der f 2 - Der p 1 - Der p 2 - Der p 21 - Der p 23 - Der p 5 - Equ c 1 - Fag s 1 - Fel d 1 - Fel d 4 - Gly d 2 - Lep d 2 - Mus m 1 - Ory c 3 - Phl p 2 - Pis v 4_RUO - Rat n - Sin a 1 - Ten m - Tyr p - Tyr p 2,1
Aca m - Aca s - Ach d - All s - Aln g 4 - Alt a 1 - Ama r - Amb a - Amb a 1 - Ani s 3 - Api m - Ara h 6 - Asp f 3 - Asp f 4 - Bet v 2 - Bla g 9 - Blo t 10 - Bos d 4 - Can f 2 - Can f 6 - Cap a - Chi spp. - Cit s - Cla h 8 - Cor a_pollen - Cry j 1 - Cuc m 2 - Cuc p - Cyn d - Cyn d 1 - Der f 1 - Der p 1 - Der p 10 - Der p 20 - Der p 5 - Fag e - Fel d 1 - Fic c - Gal d_meat - Gly d 2 - Hel a - Hev b…
Aln g 1 - Alt a 1 - Amb a - Amb a 1 - Amb a 4 - Api g 1 - Ara h 8 - Art v - Art v 1 - Bet v 1 - Can f 6 - Cor a 1.0103 - Cor a 1.0401 - Cor a_pollen - Cyn d - Cyn d 1 - Dau c - Dau c 1 - Der f 2 - Der p 2 - Equ c 1 - Fag s 1 - Fel d 1 - Fra a 1+3 - Gal d_white - Gal d_yolk - Gly m 4 - Jug r_pollen - Lol p 1 - Mal d 1 - Phl p 1 - Phl p 2 - Phl p 5.0101 - Phl p 6 - Pol d 5 - Sec c_pollen - Ves v - …
Ach d - Alt a 1 - Amb a - Amb a 1 - Bet v 1 - Can f_male urine - Cor a 1.0401 - Cry j 1 - Cup s - Cyn d - Cyn d 1 - Der f 1 - Der f 2 - Der p 1 - Der p 2 - Der p 23 - Fag s 1 - Fel d 1 - Fra a 1+3 - Gly d 2 - Lep d 2 - Loc m - Lol p 1 - Mal d 1 - Mes a 1_RUO - Ost e - Pas n - Phl p 1 - Phl p 2 - Pop n - Sal k - Sec c_pollen - Ten m,1
Ach d - Alt a 1 - Amb a - Amb a 1 - Api g 1 - Asp f 3 - Bet v 1 - Can f 1 - Can f 4 - Can f_Fd1 - Cor a 1.0103 - Cor a 1.0401 - Cor a_pollen - Cyn d 1 - Dau c - Dau c 1 - Fag s 1 - Fel d 1 - Fel d 7 - Lol p 1 - Mal d 1 - Mes a 1_RUO - Phl p 1 - Phl p 2 - Sin a 1,1
Aln g 1 - Alt a 1 - Api m - Api m 10 - Bet v 1 - Can f_male urine - Cla h 8 - Cor a 1.0103 - Cor a_pollen - Der f 2 - Der p 2 - Der p 23 - Fag s 1 - Fel d 1 - Fra a 1+3 - Lep d 2 - Pop n - Sec c_flour,1
Aln g 1 - Alt a 1 - Amb a - Amb a 1 - Ara h 8 - Bet v 1 - Bet v 2 - Can f 4 - Can f_Fd1 - Cor a 1.0103 - Cor a 1.0401 - Cor a_pollen - Cry j 1 - Cuc m 2 - Fag s 1 - Fel d 1 - Fra a 1+3 - Hev b 8 - Hom g - Lol p 1 - Mal d 1 - Mer a 1 - Phl p 1 - Phl p 12 - Phl p 2 - Phl p 5.0101 - Pho d 2,1
Aln g 1 - Amb a 1 - Art v - Art v 1 - Bla g 4 - Bla g 5 - Blo t 10 - Bos d_meat - Can f 1 - Can f 6 - Can f_Fd1 - Cap a - Chi spp. - Cry j 1 - Equ c 1 - Equ c_meat - Fel d 1 - Fel d 4 - Fel d 7 - Gad m 1 - Gly m 4 - Gly m 5 - Lol p 1 - Lol spp. - Mala s 6 - Mus m 1 - Myt e - Ory_meat - Ost e - Ovi a_meat - Phl p 1 - Rat n - Sus d_epithelia - Sus d_meat,1
Alt a 1 - Amb a - Amb a 1 - Amb a 4 - Art v - Art v 1 - Asp f 3 - Bet v 2 - Bla g 4 - Can f 1 - Clu h 1 - Cor a 11 - Cry j 1 - Cuc m 2 - Cuc p - Cup a 1 - Cyn d - Cyp c 1 - Fag e - Fel d 1 - Fel d 4 - Fel d 7 - Gal d 2 - Gal d_white - Hel a - Hev b 8 - Jug r_pollen - Mer a 1 - Par j 2 - Phl p 12 - Phl p 2 - Pho d 2 - Phod s 1 - Phr c - Pla a 2 - Pop n - Sac c - Sal s 1 - Sco s 1 - Sec c_pollen - …
Alt a 1 - Amb a - Amb a 1 - Amb a 4 - Art v - Art v 1 - Can f 1 - Can f_male urine - Fel d 1 - Fel d 7 - Phl p 2,1
Alt a 1 - Art v - Art v 1 - Fel d 1,1
Ach d - Act d 2 - All s - Alt a 1 - Ama r - Amb a - Amb a 1 - Api m - Art v - Art v 1 - Bla g 4 - Cla h - Cla h 8 - Cry j 1 - Cup a 1 - Cyp c 1 - Equ c 3 - Fel d 1 - Fra a 1+3 - Hom s LF - Par j 2 - Pha v - Phl p 2 - Pla l - Pol d - Pol d 5 - Pop n - Pru p 3 - Pyr c - Sac c - Sal k - Sec c_flour - Ten m - Thu a 1 - Ves v - Ves v 5,1
Alt a 1 - Can f 1 - Can f 4 - Can f 6 - Can f_Fd1 - Can f_male urine - Cry j 1 - Cup a 1 - Der f 1 - Der f 2 - Der p 1 - Der p 2 - Der p 21 - Der p 23 - Der p 5 - Der p 7 - Fel d 1 - Fel d 7 - Fra e - Fra e 1 - Gly d 2 - Lep d 2 - Lol p 1 - Ole e 1 - Phl p 1 - Phl p 2 - Pla l - Pla l 1 - Tyr p 2,1
Aln g 1 - Alt a 1 - Amb a - Amb a 1 - Amb a 4 - Api g 1 - Ara h 8 - Art v - Art v 1 - Art v 3 - Bet v 1 - Bet v 2 - Can f 4 - Can f_male urine - Cor a 1.0103 - Cor a 1.0401 - Cor a_pollen - Cry j 1 - Cuc m 2 - Dau c - Dau c 1 - Fag s 1 - Fel d 1 - Fra a 1+3 - Gly m 4 - Hev b 8 - Jug r_pollen - Lol p 1 - Mal d 1 - Mal d 3 - Mer a 1 - Phl p 1 - Phl p 12 - Pho d 2 - Phr c - Sec c_pollen - Ves v 1,1
Act d 2 - Alt a 1 - Alt a 6 - Bla g 4 - Can f 1 - Cla h - Cla h 8 - Fel d 1 - Ory_meat - Pap s - Par j 2 - Phl p 2 - Pis s - Pop n - Sec c_flour,1
Aln g 1 - Amb a - Amb a 1 - Api g 1 - Ara h 8 - Asp f 6 - Bet v 1 - Bet v 2 - Bos d 6 - Can f 1 - Can f 2 - Can f 3 - Can f 4 - Can f 6 - Cap h_epithelia - Clu h 1 - Cor a 1.0103 - Cor a 1.0401 - Cor a_pollen - Cuc m 2 - Cyn d - Cyn d 1 - Cyp c 1 - Dau c - Dau c 1 - Equ c 1 - Equ c 3 - Equ c_meat - Fag s 1 - Fel d 1 - Fel d 2 - Fel d 4 - Fel d 7 - Fra a 1+3 - Gad m - Gad m 1 - Gly m 4 - Hev b 8 -…
Act d 1 - Aln g 1 - Amb a - Amb a 1 - Ara h 9 - Bet v 1 - Bet v 2 - Can f 1 - Can f_Fd1 - Can f_male urine - Cav p 1 - Cor a 1.0103 - Cor a 1.0401 - Cor a_pollen - Cry j 1 - Cuc m 2 - Cyn d - Cyn d 1 - Equ c 1 - Fag s 1 - Fel d 4 - Fra a 1+3 - Hev b 8 - Jug r_pollen - Lol p 1 - Mal d 1 - Mala s 6 - Mer a 1 - Mus m 1 - Pas n - Phl p 1 - Phl p 12 - Phl p 5.0101 - Phl p 6 - Pho d 2 - Phod s 1 - Rat …
Aca m - Amb a - Amb a 1 - Asp f 6 - Bet v 2 - Bos d_meat - Cry j 1 - Cuc m 2 - Equ c_meat - Fel d 1 - Hev b 8 - Jug r_pollen - Mala s 11 - Mer a 1 - Ory_meat - Pas n - Phl p 12 - Pho d 2 - Pyr c - Sus d_meat,1
Alt a 1 - Hom g - Loc m - Myt e - Ost e - Pan b - Ten m,1
Ach d - Aln g 1 - Asp f 3 - Bet v 1 - Bla g 9 - Blo t 5 - Can f_male urine - Cor a 1.0103 - Cyn d - Cyn d 1 - Der f 1 - Der f 2 - Der p 1 - Der p 2 - Der p 21 - Der p 23 - Der p 5 - Fag s 1 - Fel d 1 - Hom g - Lep d 2 - Loc m - Lol p 1 - Ost e - Pan b - Pas n - Phl p 1 - Phl p 2 - Phl p 5.0101 - Phl p 6 - Sec c_pollen - Ten m,1
Ach d - Amb a - Amb a 1 - Asp f 6 - Can f 6 - Can f_Fd1 - Cyn d - Cyn d 1 - Fel d 1 - Hom g - Loc m - Lol p 1 - Mala s 11 - Mes a 1_RUO - Pas n - Phl p 1 - Phl p 2 - Phl p 5.0101 - Phl p 6 - Sec c_pollen,1
Aln g 1 - Alt a 1 - Bet v 1 - Bla g 4 - Bla g 9 - Can f_male urine - Cor a 1.0103 - Cor a 1.0401 - Cor a_pollen - Cyn d - Cyn d 1 - Der f 2 - Der p 2 - Der p 20 - Fag s 1 - Fel d 1 - Fel d 4 - Fra a 1+3 - Lep d 2 - Lol p 1 - Pas n - Phl p 1 - Phl p 2 - Phl p 5.0101 - Phl p 6 - Sec c_pollen,1
Alt a 1 - Amb a - Amb a 1 - Bla g 4 - Can f 1 - Can f_Fd1 - Cry j 1 - Fel d 1 - Fel d 4 - Fel d 7 - Lol p 1 - Par j 2 - Phl p 1 - Pru p 3 - Sac c,1
Aln g 1 - Alt a 1 - Amb a 1 - Api g 1 - Ara h 8 - Asp f 6 - Bet v 1 - Can f_male urine - Che a 1 - Cor a 1.0103 - Cor a 1.0401 - Cor a_pollen - Cup a 1 - Der f 1 - Der p 1 - Der p 23 - Fag s 1 - Fel d 1 - Fra a 1+3 - Hel a - Mal d 1 - Mala s 11 - Pha v - Phl p 2 - Pop n - Sal k,1
Mala s 5 - Pop n,1
Amb a 1 - Cla h 8 - Ten m,1
Amb a 1 - Can f_male urine - Der f 2 - Der p 2 - Lep d 2 - Mala s 11,1
Can f_male urine - Mala s 11,1
Ana o 3 - Api m - Api m 1 - Api m 10 - Asp f 6 - Bla g 1 - Bla g 4 - Can f 1 - Fel d 7 - Mala s 11 - Pas n - Per a - Pha v - Pol d 5 - Pop n - Sec c_flour - Sec c_pollen - Ten m - Ves v 5,1
Alt a 1 - Amb a - Amb a 1 - Cry j 1 - Lol p 1 - Pha v - Phl p 1 - Pop n - Sec c_flour,1
Aca s - Ach d - Ani s 3 - Ara h 6 - Asp f 4 - Blo t 10 - Blo t 5 - Chi spp. - Der p 10 - Der p 23 - Der p 5 - Hom g - Lit s - Loc m - Lol spp. - Ory c 3 - Ost e - Pan b - Pec spp. - Pen m 1 - Per a 7 - Rud spp. - Sec c_flour - Ten m - Vac m - Ves v 5,1
Alt a 1 - Amb a - Amb a 1 - Art v 3 - Cry j 1 - Fel d 1,1
Ach d - Asp f 6 - Mala s 11 - Ory c 3 - Sco s 1 - Sec c_flour - Ten m,1
Aca m - All s - Alt a 1 - Amb a 1 - Cap a - Car p - Cry j 1 - Cup a 1 - Equ c 3 - Fel d 1 - Fel d 4 - Fel d 7 - Hom s LF - Jug r_pollen - Ole e 1 - Ost e - Pan b - Phl p 2 - Pla a 2 - Pop n - Sec c_flour - Ses i 1,1
Blo t 5 - Cyn d - Cyn d 1 - Der f 1 - Der f 2 - Der p 1 - Der p 2 - Der p 21 - Der p 23 - Der p 5 - Der p 7 - Gly d 2 - Lep d 2 - Mala s 5 - Sec c_flour - Tyr p - Ulm c,1
Aca m - Ach d - Act d 10 - All s - Aln g 1 - Aln g 4 - Alt a 1 - Alt a 6 - Ama r - Amb a - Amb a 1 - Amb a 4 - Ani s 3 - Api g 1 - Api m - Api m 1 - Api m 10 - Ara h 15 - Ara h 8 - Ara h 9 - Art v - Art v 1 - Asp f 3 - Ave s - Bet v 1 - Bet v 2 - Blo t 10 - Bos d 4 - Bos d 8 - Can f 1 - Can f 6 - Can f_Fd1 - Car c - Car p - Che q - Chi spp. - Cic a - Cla h - Cla h 8 - Cor a 1.0103 - Cor a 1.0401 …
Aca s - Art v - Art v 1 - Bla g 4 - Blo t 21 - Blo t 5 - Bos d 2 - Can f_Fd1 - Cyn d - Cyn d 1 - Der f 1 - Der f 2 - Der p 1 - Der p 2 - Der p 21 - Der p 23 - Der p 5 - Der p 7 - Fel d 1 - Gly d 2 - Hom g - Lep d 2 - Mus m 1 - Par j 2 - Pen ch - Phl p 6 - Pop n - Pru p 3 - Rat n - Sec c_pollen - Tyr p - Tyr p 2,1
Aca s - Ach d - Ani s 3 - Ara h 6 - Arg r 1 - Asp f 3 - Asp f 4 - Blo t 10 - Blo t 5 - Can f 6 - Can f_male urine - Chi spp. - Der p 10 - Der p 21 - Der p 5 - Fel d 1 - Gal d 1 - Gly d 2 - Hom g - Lep d 2 - Lit s - Loc m - Lol p 1 - Lol spp. - Mus m 1 - Myt e - Ory c 3 - Ost e - Pan b - Pec spp. - Pen m 1 - Per a - Per a 7 - Pers a - Phl p 1 - Phl p 2 - Rud spp. - Sol spp. - Ten m - Tyr p - Vac m…
Aca s - Alt a 1 - Can f_Fd1 - Cyn d - Cyn d 1 - Der f 1 - Der f 2 - Der p 1 - Der p 2 - Der p 23 - Der p 7 - Fel d 1 - Lep d 2 - Lol p 1 - Mes a 1_RUO - Pas n - Phl p 1 - Phl p 5.0101 - Phl p 6 - Tyr p,1
Alt a 1 - Art v 1 - Blo t 21 - Cyn d 1 - Der f 1 - Der f 2 - Der p 1 - Der p 2 - Der p 21 - Der p 23 - Der p 5 - Der p 7 - Gly d 2 - Sec c_flour,1
Aca s - Ach d - Act d 10 - Aln g 1 - Amb a - Amb a 1 - Amb a 4 - Ani s 3 - Api g 2 - Ara h 6 - Art v - Art v 1 - Asp f 3 - Asp f 4 - Bet v 1 - Bet v 2 - Blo t 10 - Bos d_meat - Can f 1 - Can f 6 - Chi spp. - Clu h - Clu h 1 - Cor a 1.0103 - Cor a 1.0401 - Cor a 8 - Cor a_pollen - Cry j 1 - Cuc m 2 - Cyn d - Cyn d 1 - Cyp c 1 - Der p 10 - Fag s 1 - Fel d 4 - Fra a 1+3 - Gad m - Gad m 1 - Gad m 2+3…
Alt a 1 - Asp f 3 - Der f 2 - Der p 11 - Der p 2 - Der p 23 - Lol p 1 - Pas n - Phl p 1 - Phl p 5.0101 - Phl p 6 - Pla l - Sec c_pollen,1
Aln g 1 - Bet v 1 - Can f_Fd1 - Cor a 1.0103 - Cor a 1.0401 - Cor a_pollen - Fag s 1 - Fel d 1 - Mal d 1 - Mala s 11 - Mala s 6 - Phl p 5.0101 - Phod s 1,1
Aca m - Aca s - Ail a - All c - All s - Aln g 1 - Alt a 6 - Ama r - Ana o - Api g 1 - Ara h 8 - Asp f 4 - Ave s - Ber e - Bet v 1 - Bos d 6 - Bos d_milk - Bro pa - Can f 1 - Can f 3 - Can s - Cap h_epithelia - Car c - Che a - Cic a - Clu h - Clu h 1 - Cor a 1.0103 - Cor a 1.0401 - Cor a 11 - Cor a 9 - Cor a_pollen - Cry j 1 - Cup a 1 - Cup s - Cyn d - Cyn d 1 - Cyp c 1 - Dau c - Dau c 1 - Der f 1…
Alt a 1 - Bet v 1 - Fag s 1 - Lol p 1 - Pha v - Phl p 1 - Pop n - Sal k - Sec c_flour - Vac m,1
Alt a 1 - Api m - Api m 1 - Api m 10 - Fel d 1 - Mala s 5,1
Alt a 1 - Cla h 8 - Cyn d - Cyn d 1 - Der p 23 - Fel d 1 - Lol p 1 - Phl p 1 - Phl p 2,1
Aln g 1 - Alt a 1 - Amb a - Amb a 4 - Api g 1 - Art v - Art v 1 - Bet v 1 - Bet v 2 - Can f 1 - Can f 6 - Can f_male urine - Clu h - Clu h 1 - Cor a 1.0103 - Cor a 1.0401 - Cor a_pollen - Cuc m 2 - Cyn d - Cyn d 1 - Cyp c 1 - Dau c - Dau c 1 - Der f 2 - Der p 2 - Der p 23 - Fag s 1 - Fel d 1 - Fel d 4 - Fel d 7 - Fra a 1+3 - Gad m - Gad m 1 - Gly d 2 - Gly m 4 - Hev b 8 - Jug r_pollen - Lep d 2 -…
Alt a 1 - Dau c - Dau c 1 - Der f 1 - Der f 2 - Der p 1 - Der p 2 - Der p 20 - Der p 23 - Der p 7 - Fel d 1 - Gly d 2 - Lep d 2,1
All s - Aln g 1 - Alt a 1 - Bet v 1 - Cor a 1.0103 - Cor a 1.0401 - Cor a_pollen - Cry j 1 - Cup a 1 - Cyn d - Cyn d 1 - Fag s 1 - Fra a 1+3 - Gly m 4 - Hel a - Jug r 2 - Jug r_pollen - Lol p 1 - Mal d 1 - Ole e 1 - Pas n - Phl p 1 - Pla a 2 - Ulm c,1
Alt a 1 - Ara h 1 - Bos d 6 - Can f 1 - Can f 2 - Can f 3 - Can f 4 - Can f 6 - Can f_Fd1 - Can f_male urine - Cyn d 1 - Der p 23 - Der p 5 - Equ c 1 - Equ c 3 - Equ c_meat - Fag s 1 - Fel d 1 - Fel d 2 - Fel d 7 - Gal d 3 - Hev b 6.02 - Ory c 3 - Ory_meat - Ost e - Ovi a_meat - Ovi a_milk - Pen m 2 - Pers a - Pis v 4_RUO - Rat n - Sus d 1 - Sus d_epithelia - Sus d_meat,1
Ach d - Cla h 8 - Loc m - Ten m,1
Aca s - Ach d - Act d 1 - Ani s 3 - Blo t 10 - Chi spp. - Der p 10 - Hom g - Lit s - Loc m - Mala s 6 - Pan b - Pen m 1 - Pen m 3 - Per a 7 - Raj c - Ten m - Tyr p - Ves v - Ves v 1 - Ves v 5,1
Aca s - Ach d - Aln g 4 - Alt a 1 - Amb a - Amb a 1 - Amb a 4 - Ani s 3 - Ara h 15 - Ara h 6 - Art v - Art v 1 - Asp f 3 - Asp f 4 - Bla g 4 - Blo t 10 - Blo t 21 - Blo t 5 - Bos d 2 - Bos d 8 - Chi spp. - Clu h 1 - Cra c 6 - Cyn d - Cyn d 1 - Cyp c 1 - Der f 1 - Der f 2 - Der p 1 - Der p 10 - Der p 2 - Der p 21 - Der p 23 - Der p 5 - Fel d 1 - Gly d 2 - Hom g - Lep d 2 - Lit s - Loc m - Lol p 1 …
Amb a - Amb a 1 - Art v - Art v 1 - Asp f 3 - Bet v 2 - Cuc m 2 - Cyn d - Cyn d 1 - Fel d 1 - Hev b 8 - Lol p 1 - Mala s 5 - Mer a 1 - Phl p 1 - Phl p 12 - Pho d 2 - Sec c_pollen,1
[truncated: 938 more rows]
